# Supplementary material for: Desert Hedgehog mediates stem Leydig cell differentiation through Ptch2/Gli1/Sf1 signaling axis
Source: eLife. 2026 Jun 29;15:RP109979. doi: 10.7554/eLife.109979 (PMC13313686; doi:10.7554/eLife.109979)
Supplement: Figure 1—figure supplement 1—source data 1. [file elife-109979-fig1-figsupp1-data1.xlsx]

## Sheet: Sheet1
test_id	gene_id	gene	locus		brain _1	heart_2	kidney _1	liver_2	testis_value_1	ovary _1	skeletal muscle	HK
ENSONIG00000000001	ENSONIG00000000001	PPFIBP1 (1 of 2)	GL831243.1:195804-234623		6.81145	27.9315	4.47581	2.40936	21.1988	15.6521	18.4635	9.25412
ENSONIG00000000002	ENSONIG00000000002	cyb5r3	GL831243.1:195804-234623		74.0442	160.274	26.2864	26.4289	121.664	59.9883	176.652	119.463
ENSONIG00000000003	ENSONIG00000000003	syt1a	GL831243.1:237232-296029		292.017	10.6309	0.0447311	0.239574	6.47699	0.290693	0.210545	1.28283
ENSONIG00000000004	ENSONIG00000000004	pawr	GL831243.1:475958-543538		5.06667	12.4621	10.2084	6.32004	8.77466	3.6414	1.24154	1.53874
ENSONIG00000000005	ENSONIG00000000005	ppp1r12a	GL831243.1:558165-615914		7.63603	5.46909	2.07882	1.40953	9.64925	1.77472	3.24621	7.13619
ENSONIG00000000006	ENSONIG00000000006	rps16	GL831243.1:653138-656057		1176.63	4103.77	1027.59	5782.53	1964.66	540.892	2569.44	5892.94
ENSONIG00000000007	ENSONIG00000000007	myf6	GL831243.1:697392-699565		0	0	0	0	0.105815	0.0601543	14.7015	0
ENSONIG00000000008	ENSONIG00000000008	guca1a	GL831243.1:2151992-2156712		0	115.966	0.094628	0	0	0.129711	0	0
ENSONIG00000000009	ENSONIG00000000009	golgb1	GL831243.1:2162662-2175369		2.07185	1.25998	0.546276	0.738376	3.10541	0.828046	0.466678	4.79392
ENSONIG00000000010	ENSONIG00000000010	hcls1	GL831243.1:2181655-2197855		9.28136	18.955	10.6087	1.6396	21.3651	3.02764	6.70237	85.2286
ENSONIG00000000011	ENSONIG00000000011	LLPH	GL831243.1:2181655-2197855		13.7704	10.2167	4.65373	11.7541	35.9568	67.699	24.341	31.7123
ENSONIG00000000012	ENSONIG00000000012	pex26	GL831243.1:2181655-2197855		1.85619	1.72275	0.284909	0	4.10751	8.93501	1.39957	1.74707
ENSONIG00000000013	ENSONIG00000000013	USP41	GL831243.1:2199758-2208790		4.48334	13.0221	5.13768	4.46072	5.45871	5.49388	1.00425	24.8385
ENSONIG00000000014	ENSONIG00000000014	ccnd2b	GL831243.1:2243067-2258693		10.835	43.6062	3.7675	6.21668	37.3254	11.366	10.3253	21.7658
ENSONIG00000000015	ENSONIG00000000015	C12orf5 (1 of 2)	GL831243.1:2304270-2309272		7.25751	2.65815	0.459946	0.366309	22.4574	13.7233	2.18853	3.13876
ENSONIG00000000016	ENSONIG00000000016	fgf23	GL831243.1:2311992-2314957		0.317893	0	0	0	0.376501	0	0.317198	0
ENSONIG00000000017	ENSONIG00000000017	fgf6b (1 of 2)	GL831243.1:2315908-2322511		1.57045	0.082238	0.014941	0.160657	0.0745891	0.130206	11.3217	0.0323419
ENSONIG00000000018	ENSONIG00000000018	galnt8b	GL831243.1:2348119-2363923		0	0	0.0854372	0	0.309856	23.3123	2.40263	0.298479
ENSONIG00000000019	ENSONIG00000000019	xpo1a	GL831280.1:2152-29592		10.4805	12.4675	4.45414	4.50004	73.292	10.254	5.4479	43.0764
ENSONIG00000000020	ENSONIG00000000020	cecr1b	GL831243.1:2348119-2363923		0.322499	5.35064	2.45407	0.577584	0.242317	1.55098	1.32225	0.407096
ENSONIG00000000021	ENSONIG00000000021	atp6v1e1b	GL831243.1:2365374-2376212		363.88	63.6169	42.5559	13.6424	23.7964	62.5786	19.4532	96.0976
ENSONIG00000000022	ENSONIG00000000022	ENDOD1 (1 of 22)	GL831446.1:59672-62819		0	0	0	0	0	0	0	0.182571
ENSONIG00000000023	ENSONIG00000000023	ENDOD1 (2 of 22)	GL831446.1:83087-85992		0	0	0	0	0	0	0	0
ENSONIG00000000024	ENSONIG00000000024	ENDOD1 (3 of 22)	GL831446.1:109632-111113		0	0	0	0	0	0	0	0
ENSONIG00000000025	ENSONIG00000000025	-	GL831446.1:138979-142025		0	0.303966	0	3.82095	0.698873	0	0	0.226847
ENSONIG00000000026	ENSONIG00000000026	ENDOD1 (4 of 22)	GL831446.1:161770-163603		0	0	0	0	0	0	0	0.172733
ENSONIG00000000027	ENSONIG00000000027	-	GL831446.1:212895-215002		0	0	0.166133	0.229634	0	0	0	1.54387
ENSONIG00000000028	ENSONIG00000000028	-	GL831446.1:298858-299503		1.07443	0	0	0	0	0	0	0.462212
ENSONIG00000000029	ENSONIG00000000029	cct4	GL831280.1:32957-53546		66.7997	159.7	54.5014	166.91	69.0685	32.9925	202.201	293.126
ENSONIG00000000030	ENSONIG00000000030	-	GL831446.1:325577-327690		0	0	0	0	0	0	0	0
ENSONIG00000000031	ENSONIG00000000031	spic	GL831243.1:2392098-2394442		1.5294	1.62207	1.96808	0.191345	0.532351	0	1.37482	10.2875
ENSONIG00000000032	ENSONIG00000000032	-	GL831446.1:330638-333181		4.05	0	0.971282	0	0	16.342	5.43101	0.912777
ENSONIG00000000033	ENSONIG00000000033	TMEM185B	GL831446.1:367523-374863		15.9684	22.3386	7.71035	5.55489	25.925	14.9579	6.2111	12.6922
ENSONIG00000000034	ENSONIG00000000034	mybpc1	GL831243.1:2400554-2438259		0.0674018	38.9333	3.44163	0	1.16292	0.164658	0.504029	0.288177
ENSONIG00000000035	ENSONIG00000000035	mus81	GL831446.1:375493-384908		3.194	2.05488	0.514722	0.921267	10.7924	14.5523	1.80846	3.78619
ENSONIG00000000036	ENSONIG00000000036	pus10	GL831280.1:32957-53546		12.1271	13.5505	10.4284	14.8752	14.5207	7.35693	23.0316	84.4175
ENSONIG00000000037	ENSONIG00000000037	ovol1	GL831446.1:388319-399226		0	0	0.582017	0	0.172809	2.10275	0.65957	0.013255
ENSONIG00000000038	ENSONIG00000000038	AKT3 (1 of 2)	GL831280.1:55935-74118		47.4508	23.1966	2.48843	2.03053	19.4971	2.58958	2.71327	7.15408
ENSONIG00000000039	ENSONIG00000000039	cmasa	GL831446.1:470543-479862		0.0509246	1.38361	2.47973	0.266396	0.340842	4.45645	1.20026	0
ENSONIG00000000040	ENSONIG00000000040	-	GL832066.1:22477-30190		0.410815	0.388281	0.815002	0.37237	1.64754	0.230994	0.691702	3.77771
ENSONIG00000000041	ENSONIG00000000041	crfb17	GL831280.1:132396-143223		0	0	0.165066	0.105151	0.960097	4.32174	0.828228	0.430823
ENSONIG00000000042	ENSONIG00000000042	ltv1	GL831280.1:146160-154100		9.24175	28.7186	6.60236	15.1665	31.3092	45.7476	38.9863	24.4564
ENSONIG00000000043	ENSONIG00000000043	capn9	GL831280.1:155167-167753		0.269694	0.241184	0.305441	0	0.625881	0.328779	1.01504	2.61041
ENSONIG00000000044	ENSONIG00000000044	-	GL831268.1:35355-35838		0	0	0	0	0	0	0	0
ENSONIG00000000045	ENSONIG00000000045	-	GL831268.1:38291-41062		0	0	0	93.8916	0	0.0549195	0	0
ENSONIG00000000046	ENSONIG00000000046	rspo2	GL831268.1:45783-106479		5.44754	1.00244	0.0916053	0.625074	5.58276	0.200685	0.140672	0
ENSONIG00000000047	ENSONIG00000000047	eif3ea	GL831268.1:112185-141135		47.5114	302.784	143.844	341.113	129.393	64.0068	150.914	412.43
ENSONIG00000000048	ENSONIG00000000048	chpt1	GL831243.1:2442640-2449076		18.7292	22.5041	11.9824	47.1224	23.9145	8.66323	12.9121	16.2397
ENSONIG00000000049	ENSONIG00000000049	emc2	GL831268.1:149525-176522		31.6035	30.0225	12.6904	18.3774	32.252	22.8163	21.6592	28.495
ENSONIG00000000050	ENSONIG00000000050	gnptab	GL831243.1:2456692-2477366		4.98871	1.21571	1.34757	0.804562	9.69479	2.54343	2.02222	21.6682
ENSONIG00000000051	ENSONIG00000000051	trhra	GL831268.1:244797-254554		4.57882	0.990781	0.148132	0	2.51852	0.04016	0.420438	0.0296794
ENSONIG00000000052	ENSONIG00000000052	gdf6a	GL831268.1:399789-407641		0.0877089	0.312522	1.93392	0.985193	0.182059	0	0.0894121	0.177454
ENSONIG00000000053	ENSONIG00000000053	dram1	GL831243.1:2485281-2489048		0.228929	1.73194	1.03524	0.788426	0.180971	0.315068	0	8.06474
ENSONIG00000000054	ENSONIG00000000054	ccdc53	GL831243.1:2493615-2497857		10.9209	13.2506	4.92599	7.59555	18.9289	37.745	13.0993	21.8782
ENSONIG00000000055	ENSONIG00000000055	sybu	GL831268.1:416403-423827		107.666	8.91097	0.131431	0.22425	6.2055	20.7912	3.60615	0.012983
ENSONIG00000000056	ENSONIG00000000056	ebag9	GL831268.1:427650-432011		20.9501	18.8544	8.28893	14.979	34.3876	11.3735	38.5269	27.4649
ENSONIG00000000057	ENSONIG00000000057	zgc:113263	GL831243.1:2498613-2505339		1.58619	1.90789	0.793074	0.605731	5.2092	3.18937	0.85286	2.14719
ENSONIG00000000058	ENSONIG00000000058	-	GL831243.1:2514969-2528569		3.05594	35.2844	27.3367	70.2305	8.0773	0.678723	1.31307	5.18939
ENSONIG00000000059	ENSONIG00000000059	ttk	GL831268.1:432110-442611		1.17817	2.42339	1.22668	1.02154	38.4789	16.9137	3.32157	33.5104
ENSONIG00000000060	ENSONIG00000000060	aste1	AERX01073626.1:342-3069		0.297861	7.54276	0.682105	0.793656	3.02507	0.307114	0.172691	11.2808
ENSONIG00000000061	ENSONIG00000000061	taf5l	GL831280.1:169735-177495		3.76323	5.20963	1.00364	1.47771	11.5042	10.193	3.84023	8.63441
ENSONIG00000000062	ENSONIG00000000062	bckdhb	GL831268.1:445918-501624		65.4524	169.179	102.48	66.9144	36.6169	35.9542	59.5541	28.1814
ENSONIG00000000063	ENSONIG00000000063	nup133	GL831280.1:178913-199138		5.39037	4.50346	2.02112	2.52228	9.98245	6.22503	4.0658	17.4755
ENSONIG00000000064	ENSONIG00000000064	FAM46A (1 of 2)	GL831268.1:575250-580751		3.72084	9.10096	0.288847	0.451193	1.30923	0.170355	1.51033	0.176135
ENSONIG00000000065	ENSONIG00000000065	ibtk	GL831268.1:593273-612730		14.6346	16.3823	6.90014	4.27173	15.5554	2.47312	14.8576	17.3713
ENSONIG00000000066	ENSONIG00000000066	acta1a	GL831280.1:203307-208798		0.0736255	373.976	0.972163	0.226764	2.70905	0.110287	2.19713	0.451455
ENSONIG00000000067	ENSONIG00000000067	ARHGEF37	GL831451.1:162534-171664		10.0211	10.0262	1.58712	2.67926	14.114	3.55689	56.7659	5.69845
ENSONIG00000000068	ENSONIG00000000068	cdc6	GL831280.1:221118-226353		0.180831	0.828825	0.553083	0.275476	8.0724	11.9548	3.8803	15.1136
ENSONIG00000000069	ENSONIG00000000069	-	GL831451.1:247029-260192		1.70176	5.12924	4.03062	3.20988	1.50427	0.203129	6.20778	25.3988
ENSONIG00000000070	ENSONIG00000000070	polr2b	GL831451.1:301623-332095		24.4605	19.4645	10.5298	24.6082	67.7127	16.7891	21.0549	43.7038
ENSONIG00000000071	ENSONIG00000000071	ube3d	GL831268.1:648878-667869		3.9036	4.25953	1.36414	1.36564	31.9302	25.6589	3.98469	8.69926
ENSONIG00000000072	ENSONIG00000000072	dopey1	GL831268.1:668711-696938		6.57845	4.54076	1.47991	2.13978	15.1882	2.9226	1.61736	4.39521
ENSONIG00000000073	ENSONIG00000000073	WIPF2	GL831280.1:259913-272279		2.87038	4.65316	1.88012	2.51314	12.4267	3.89259	2.12451	2.82043
ENSONIG00000000074	ENSONIG00000000074	igfbp7	GL831451.1:332709-342224		43.0437	40.8609	12.1591	88.8204	11.3128	4.15639	25.5915	10.9806
ENSONIG00000000075	ENSONIG00000000075	cry1a	GL831243.1:32385-48822		66.6272	54.2589	11.8807	4.26222	24.6996	5.05403	23.4507	30.6138
ENSONIG00000000076	ENSONIG00000000076	syt10	GL831243.1:83684-102371		15.5388	0.766596	1.4244	0.50387	7.84957	0.212788	0.299946	0
ENSONIG00000000077	ENSONIG00000000077	myf5	GL831243.1:705568-708716		0	0	0	0	0.880334	0	12.4711	0
ENSONIG00000000078	ENSONIG00000000078	lin7a	GL831243.1:723219-743713		36.7403	8.51083	0.998876	1.42585	2.64828	0	0.806127	4.09411
ENSONIG00000000079	ENSONIG00000000079	acss3	GL831243.1:768726-815383		2.70284	3.81073	2.90303	0.932131	6.73071	3.88711	2.54544	6.54604
ENSONIG00000000080	ENSONIG00000000080	ppfia2	GL831243.1:821453-995200		11.6385	1.03848	0.025425	0	2.45773	1.12411	0.203715	0.0489711
ENSONIG00000000081	ENSONIG00000000081	-	GL831243.1:1037163-1043954		8.74766	0.336851	0.462191	68.0516	5.9962	35.6056	1.43076	0
ENSONIG00000000082	ENSONIG00000000082	foxm1 (1 of 2)	GL831243.1:1052408-1055819		0.407771	0	0	0	14.433	4.29394	0.797762	6.75056
ENSONIG00000000083	ENSONIG00000000083	-	GL831243.1:1056829-1057879		0.224498	0.388123	0.453615	0	13.662	57.2626	3.49151	15.897
ENSONIG00000000084	ENSONIG00000000084	TULP3	GL831243.1:1072276-1083811		9.62579	1.91576	2.39074	0.19898	7.36083	0.102868	0.694742	0.382306
ENSONIG00000000085	ENSONIG00000000085	TRIM35 (1 of 54)	GL831243.1:1090460-1092526		6.2703	9.20365	3.90655	4.59133	0.761515	33.5552	6.23778	19.4055
ENSONIG00000000086	ENSONIG00000000086	ptn	GL831243.1:1160308-1173842		385.571	25.6811	0.208951	17.4931	0	0	0	0
ENSONIG00000000087	ENSONIG00000000087	mtpn	GL831243.1:1402531-1420291		66.1906	31.4792	29.2656	18.5691	25.9685	5.17679	7.22004	91.3899
ENSONIG00000000088	ENSONIG00000000088	FAM180A (1 of 2)	GL831243.1:1462658-1472815		0.444009	18.1654	0.669468	4.7366	1.49662	0.074864	1.5974	0.314595
ENSONIG00000000089	ENSONIG00000000089	sema3c	GL831243.1:1520465-1542878		7.60917	6.36189	0.249836	0	59.5782	1.51818	123.775	0.122126
ENSONIG00000000090	ENSONIG00000000090	cd36	GL831243.1:1545555-1553043		6.10848	0.295736	0	0	0.868185	0	0.168415	0
ENSONIG00000000091	ENSONIG00000000091	gnai1	GL831243.1:1556451-1571989		47.3341	167.435	7.7543	32.0947	49.7247	11.715	6.94876	65.8884
ENSONIG00000000092	ENSONIG00000000092	magi2	GL831243.1:1742563-1928974		0.570399	7.25274	0.238622	0	2.43246	1.43321	0.91552	0.220701
ENSONIG00000000093	ENSONIG00000000093	-	AERX01071771.2:9-5216		0.820637	1.50831	0.168665	0.1589	4.14104	0.564961	0.201595	2.99936
ENSONIG00000000094	ENSONIG00000000094	FAR2	GL831243.1:1941682-1996321		13.3989	8.5851	2.67285	0.365197	9.54943	7.53637	3.99617	38.1676
ENSONIG00000000095	ENSONIG00000000095	ERGIC2 (1 of 2)	GL831243.1:2000340-2004992		21.2948	1.34038	0.285009	0	9.47805	0.111401	0	0.268559
ENSONIG00000000096	ENSONIG00000000096	kdm7aa	GL831243.1:2008397-2036880		4.17422	3.79477	1.97609	1.17616	10.6742	0.696552	3.5867	5.89224
ENSONIG00000000097	ENSONIG00000000097	kmt2e	GL831243.1:2058195-2077950		11.6055	11.4595	4.79366	3.85583	23.3098	1.34285	4.39246	16.0515
ENSONIG00000000098	ENSONIG00000000098	lhfpl3	GL831243.1:2083059-2137469		18.4726	1.40645	0.0208256	0	0.363267	0.827986	0.126836	0
ENSONIG00000000099	ENSONIG00000000099	orc5	GL831243.1:2139223-2150050		3.33337	1.50059	0.491341	1.19626	36.4443	32.019	2.09712	12.4056
ENSONIG00000000100	ENSONIG00000000100	COX18	GL831451.1:346052-354691		9.43817	10.139	2.76053	8.12975	16.5226	18.9169	9.30111	14.0368
ENSONIG00000000101	ENSONIG00000000101	selt2	GL831451.1:363501-372993		54.1463	85.2573	34.797	41.0419	60.6605	85.7486	76.293	75.1383
ENSONIG00000000102	ENSONIG00000000102	npepps	GL831280.1:289647-316879		15.6156	12.2692	5.49507	3.44987	27.781	4.49712	19.7988	26.657
ENSONIG00000000103	ENSONIG00000000103	sqstm1	GL831451.1:382844-386180		47.4327	118.975	39.358	96.4618	29.9471	13.8426	50.0492	50.7219
ENSONIG00000000104	ENSONIG00000000104	snap91	GL831268.1:698098-750932		27.7066	1.45661	0.0135032	0	3.53569	0.0697152	0.0756082	0.0273222
ENSONIG00000000105	ENSONIG00000000105	TBC1D9B	GL831451.1:413435-427508		22.9124	18.7845	6.39158	7.3078	21.1914	3.51646	33.6918	17.0732
ENSONIG00000000106	ENSONIG00000000106	me1	GL831268.1:807469-859564		0.901065	68.5906	2.27918	4.2066	15.3402	1.26726	79.3779	10.8913
ENSONIG00000000107	ENSONIG00000000107	mrpl45	GL831280.1:319166-328819		15.3594	60.8274	10.2777	15.7697	37.3652	42.6558	49.225	31.6622
ENSONIG00000000108	ENSONIG00000000108	RNF130	GL831451.1:436493-477283		10.9369	8.03694	1.49223	2.38265	9.52143	2.74889	2.37078	4.35906
ENSONIG00000000109	ENSONIG00000000109	GPR179	GL831280.1:330444-358774		3.66041	0.168864	0.0205437	0.0543822	0.27005	3.27995	0.371978	0.0496929
ENSONIG00000000110	ENSONIG00000000110	F2RL3	GL831451.1:482114-483383		0.593136	3.64897	0.270314	0.45778	2.52945	0	0.495291	0.969423
ENSONIG00000000111	ENSONIG00000000111	arap3	GL831451.1:495489-565510		11.4356	13.4599	2.32153	1.34455	5.20165	0.309907	2.56189	3.57608
ENSONIG00000000112	ENSONIG00000000112	prdm13	GL831268.1:904332-911334		0.44562	2.24222	0	0	0.0261189	0	0.208785	0.00799327
ENSONIG00000000113	ENSONIG00000000113	zgc:172323	GL831268.1:917115-921443		0	0.102375	0	0	0	0.1672	0	0.030171
ENSONIG00000000114	ENSONIG00000000114	socs7	GL831280.1:368604-387983		4.79488	0.537857	0.0784359	0.229554	0.43712	0.0114637	0.107776	0.301776
ENSONIG00000000115	ENSONIG00000000115	si:dkey-165n16.1	GL831268.1:923448-926259		3.26918	5.05911	2.11037	1.6607	4.55179	68.1587	13.1453	5.42634
ENSONIG00000000116	ENSONIG00000000116	usp45	GL831268.1:928166-959767		4.91455	3.35517	1.23187	1.02759	8.92924	3.97905	7.03653	7.55517
ENSONIG00000000117	ENSONIG00000000117	sp2	GL831280.1:393487-404835		4.51838	3.01031	1.4738	0.825933	8.0083	0.451002	1.25847	5.55142
ENSONIG00000000118	ENSONIG00000000118	si:dkeyp-110e4.11	GL831451.1:570604-585300		5.63897	0	0.165802	1.2695	0.410103	5.81029	0.499306	0
ENSONIG00000000119	ENSONIG00000000119	ABCC10	GL831280.1:409939-425315		1.29175	1.01804	0.31253	0.192838	2.10706	0.0254776	0.368241	1.57815
ENSONIG00000000120	ENSONIG00000000120	pnisr	GL831268.1:966473-972901		92.3049	53.1842	21.0243	28.8363	51.9332	37.8663	26.407	62.861
ENSONIG00000000121	ENSONIG00000000121	fam98a (1 of 3)	GL832371.1:5558-9104		0.198267	0.531354	0.0324266	0.183546	0.317515	0.048757	0	0.230246
ENSONIG00000000122	ENSONIG00000000122	-	GL832133.1:1754-4246		0.702385	0.6705	0.339297	0	0.765534	0.466021	0	2.19621
ENSONIG00000000123	ENSONIG00000000123	-	AERX01075601.2:193-1542		0	0	0	0	0	0	0	0.529901
ENSONIG00000000124	ENSONIG00000000124	coq3	GL831268.1:976834-981939		14.0332	10.3202	4.29447	5.83448	17.3444	33.1925	7.0621	6.92998
ENSONIG00000000125	ENSONIG00000000125	faxcb	GL831268.1:983938-999191		10.9446	1.27738	0.502938	0.282717	18.7027	1.21755	1.30625	1.49451
ENSONIG00000000126	ENSONIG00000000126	-	GL831893.1:29899-31971		0	0	0.0390681	0	0	0	0.256818	0
ENSONIG00000000127	ENSONIG00000000127	fbxl4	GL831268.1:1028854-1046043		4.74293	4.583	1.18334	4.88017	5.91049	1.02803	3.94893	4.49432
ENSONIG00000000128	ENSONIG00000000128	mms22l	GL831268.1:1268760-1317735		0.224016	0.26009	0.0736497	0.180421	3.70391	2.37285	0.314048	3.55051
ENSONIG00000000129	ENSONIG00000000129	PTPRM (1 of 3)	GL831812.1:3035-99163		1.72061	4.8148	2.06083	0	3.05468	1.66455	2.6264	1.23239
ENSONIG00000000130	ENSONIG00000000130	klhl32	GL831268.1:1268760-1317735		4.84973	3.53677	0.206333	0	2.55439	0.462402	0.0656645	0.990203
ENSONIG00000000131	ENSONIG00000000131	-	GL831395.1:7370-11141		0	6.63094	0.595924	1.40132	1.59708	0	0	0.53799
ENSONIG00000000132	ENSONIG00000000132	-	AERX01073306.1:5-1375		0	0	0	0	0	0	0	0
ENSONIG00000000133	ENSONIG00000000133	-	GL831395.1:16878-20276		2.86794	15.1434	9.79241	3.94884	3.88699	0.465506	10.1012	15.4603
ENSONIG00000000134	ENSONIG00000000134	GTF3C1 (1 of 2)	GL831395.1:22726-46499		5.31976	3.90089	1.20498	1.06306	16.8901	3.72321	1.82688	6.63782
ENSONIG00000000135	ENSONIG00000000135	fzd6	GL831268.1:1319884-1328498		7.0514	30.2308	17.6498	4.25637	19.3593	0.789304	4.50112	3.83395
ENSONIG00000000136	ENSONIG00000000136	zgmrpl4	GL831280.1:446158-457569		2.74684	9.15746	1.47187	2.85812	4.09006	8.2475	11.2236	10.5043
ENSONIG00000000137	ENSONIG00000000137	cthrc1b	GL831268.1:1331276-1336874		4.05077	7.11741	1.73951	0.547123	2.34997	0.43211	1.34207	1.57727
ENSONIG00000000138	ENSONIG00000000138	HYLS1	GL831280.1:446158-457569		6.29905	5.18823	1.56954	1.6283	20.1505	23.7386	3.09968	10.3602
ENSONIG00000000139	ENSONIG00000000139	slc25a32b	GL831268.1:1337682-1342009		8.87508	4.2874	1.74835	1.96183	15.6275	19.4788	11.0516	14.8132
ENSONIG00000000140	ENSONIG00000000140	sema6dl	GL831420.1:27930-48568		15.2587	2.45819	5.86169	2.40967	11.6409	1.26831	2.41998	0.784572
ENSONIG00000000141	ENSONIG00000000141	COL9A1 (1 of 2)	GL831280.1:459035-480806		3.58028	4.65396	0	0	0.90864	0.396727	0.0934519	0.0632723
ENSONIG00000000142	ENSONIG00000000142	dcaf13	GL831268.1:1342955-1356285		15.2944	9.01346	4.02254	3.62751	30.1184	36.7231	9.26269	27.8989
ENSONIG00000000143	ENSONIG00000000143	rims2a	GL831268.1:1357827-1498039		27.7287	2.13365	0.353323	0.0627299	1.8673	0.214338	0.181012	0.0294186
ENSONIG00000000144	ENSONIG00000000144	AXIN1 (1 of 2)	GL831395.1:48877-67257		9.55167	7.52441	3.73635	3.14543	12.5445	1.16924	3.30673	12.0531
ENSONIG00000000145	ENSONIG00000000145	DMXL2	GL831420.1:298756-343668		28.0107	2.89063	0.465189	1.60531	7.89761	1.08801	1.48303	2.1953
ENSONIG00000000146	ENSONIG00000000146	thumpd1	GL831395.1:85686-87351		13.936	10.8754	1.85236	2.04174	46.1166	28.9995	6.94212	12.3975
ENSONIG00000000147	ENSONIG00000000147	ERI2	GL831395.1:90234-94319		0.294724	0.905667	0.118597	0	6.02413	6.76297	0.865298	2.23019
ENSONIG00000000148	ENSONIG00000000148	-	GL831395.1:94749-106347		1.15935	1.63592	0.641934	2.12347	13.2942	2.3785	1.56205	4.40469
ENSONIG00000000149	ENSONIG00000000149	DCSTAMP	GL831268.1:1507181-1529880		0	0	0	0	0.488964	0	0	0
ENSONIG00000000150	ENSONIG00000000150	dpys	GL831268.1:1533752-1548638		0	0	1.68768	57.2035	0.994867	0.0263707	0	0.021862
ENSONIG00000000151	ENSONIG00000000151	parn	GL831395.1:108188-120927		13.4251	7.59939	3.41065	2.97282	16.4607	77.4865	23.5417	23.2439
ENSONIG00000000152	ENSONIG00000000152	zfpm2a	GL831268.1:1642028-1731860		29.7535	1.10856	0.0400215	0.133676	4.48349	0.135674	0.597889	0.113021
ENSONIG00000000153	ENSONIG00000000153	colm	GL831420.1:298756-343668		0.872963	0.709217	0.105932	0	0.117474	0.163856	3.1057	0.0817364
ENSONIG00000000154	ENSONIG00000000154	OXR1	GL831268.1:1883541-1930334		39.8054	20.8313	5.764	9.65726	12.4039	1.38569	11.3838	5.97812
ENSONIG00000000155	ENSONIG00000000155	cyp19a1a	GL831420.1:347058-350035		0	0	0	0	0.0823346	26.2716	0	0.0578692
ENSONIG00000000156	ENSONIG00000000156	ptp4a1	GL831280.1:485663-489158		109.244	49.2035	10.9593	9.73984	18.8179	8.77459	8.63289	90.9375
ENSONIG00000000157	ENSONIG00000000157	lgsn	GL831280.1:497799-500830		0	0.292988	0.026121	0	0.656604	0.0647532	0	0.0611146
ENSONIG00000000158	ENSONIG00000000158	FAM83B (1 of 2)	GL831280.1:512259-515165		0	0	0	0	0	0	0	0
ENSONIG00000000159	ENSONIG00000000159	MYOM2 (1 of 2)	GL831280.1:515766-542576		0.300588	463.096	0.163549	2.71386	2.32063	1.67903	824.325	0.303983
ENSONIG00000000160	ENSONIG00000000160	elfn1b	GL831395.1:295063-303036		2.41066	0	0.0165468	0	0.434006	0	0	0.0262707
ENSONIG00000000161	ENSONIG00000000161	sqlea	GL831268.1:1933831-1939803		6.8701	2.01311	0.156667	71.846	5.80393	0.602679	0.177573	0.093119
ENSONIG00000000162	ENSONIG00000000162	mad1l1	GL831395.1:329383-396127		4.40203	6.303	2.49463	1.67424	20.3971	25.0371	5.83651	11.5269
ENSONIG00000000163	ENSONIG00000000163	RNF144B	GL831268.1:1955177-1965660		2.33987	7.83328	0.935585	3.35853	4.83484	0.123714	0.862532	1.73995
ENSONIG00000000164	ENSONIG00000000164	IQCG	GL831268.1:1969591-1974483		1.54133	0.322616	3.21561	0	31.9119	0.235451	0.273735	1.52083
ENSONIG00000000165	ENSONIG00000000165	SPIRE1 (1 of 2)	GL831268.1:1975083-2011860		27.8513	1.44649	0.0667476	0.0573941	0.961079	0	0	0
ENSONIG00000000166	ENSONIG00000000166	tnfaip8l3	GL831420.1:361648-385292		10.6274	0.92407	1.48933	0.134442	0.874967	0.267997	0.375796	1.46288
ENSONIG00000000167	ENSONIG00000000167	scg3	GL831420.1:392046-406346		65.1548	22.5761	0.0906153	0.632725	3.69214	3.5792	1.3313	0.702498
ENSONIG00000000168	ENSONIG00000000168	-	GL831395.1:456367-460468		1.87708	0.527354	1.49623	0	0.792163	0.0654913	0.284832	0.249836
ENSONIG00000000169	ENSONIG00000000169	-	GL831395.1:505598-516034		8.15737	54.237	1.94309	0.692455	4.86645	9.26288	3.00721	8.01196
ENSONIG00000000170	ENSONIG00000000170	fpr1 (1 of 10)	GL831268.1:2025245-2036781		0.139232	0.264712	0	0	4.50692	2.86846	0.285647	0
ENSONIG00000000171	ENSONIG00000000171	ttyh3b	GL831395.1:520802-547863		83.8665	3.42898	0.792453	4.49937	9.03375	0.0911719	0.91623	3.21771
ENSONIG00000000172	ENSONIG00000000172	lysmd2	GL831420.1:407507-413785		22.3425	5.85967	2.00913	0.534686	13.5792	4.93096	8.38909	11.3033
ENSONIG00000000173	ENSONIG00000000173	-	GL832573.1:2346-4666		0	0	0	0	0.262667	0	0.335727	0.324661
ENSONIG00000000174	ENSONIG00000000174	tmod2	GL831420.1:425524-440432		49.9408	28.1293	9.07356	4.932	22.2751	7.39847	13.4035	59.9404
ENSONIG00000000175	ENSONIG00000000175	iqce	GL831395.1:548657-558372		10.0084	2.31913	1.41917	0.078927	21.803	2.0144	1.01389	1.13457
ENSONIG00000000176	ENSONIG00000000176	leo1	GL831420.1:443293-453552		20.947	11.678	5.49819	4.08705	27.6635	15.8018	8.56419	22.8892
ENSONIG00000000177	ENSONIG00000000177	si:ch211-160d14.1	GL831395.1:562565-569221		152.383	6.62918	0.224774	0.339301	1.71923	0.202822	2.77239	0.0180742
ENSONIG00000000178	ENSONIG00000000178	zgc:152698	GL831395.1:574282-575465		6.5727	0.589867	0	0	0.512708	0.55788	0	0
ENSONIG00000000179	ENSONIG00000000179	plk1	GL831395.1:578467-584167		0.388	3.87113	1.4212	1.12358	38.7431	28.6922	6.78776	53.3899
ENSONIG00000000180	ENSONIG00000000180	mapk6	GL831420.1:478368-489289		59.9814	66.5685	67.8589	56.3674	25.5233	4.07626	60.1199	67.5589
ENSONIG00000000181	ENSONIG00000000181	palb2	GL831395.1:587107-595693		0	0.149167	0.0472021	0	7.5666	2.66011	0.597117	1.80472
ENSONIG00000000182	ENSONIG00000000182	tbx5a	GL831315.1:35001-53946		0	75.7828	0	0	0.0722604	0	0.0922731	0.0157429
ENSONIG00000000183	ENSONIG00000000183	USP50	GL831420.1:500390-518812		0.0695334	0.236046	0	0	4.86017	0	0.126432	0
ENSONIG00000000184	ENSONIG00000000184	RDH8 (1 of 2)	GL831395.1:598985-604303		0	0	0	0	0	0	0	0
ENSONIG00000000185	ENSONIG00000000185	usp8	GL831420.1:500390-518812		13.9819	12.653	8.1978	4.79185	21.0808	2.24112	5.57852	15.8043
ENSONIG00000000186	ENSONIG00000000186	hk1 (1 of 2)	GL831280.1:548236-566757		99.2459	545.277	3.07743	0.960242	2.5433	0.140063	13.0569	7.15128
ENSONIG00000000187	ENSONIG00000000187	tbx3a	GL831315.1:76329-86049		2.92763	3.26257	0.777277	0.435608	0.592378	0.0150411	0.257778	3.16047
ENSONIG00000000188	ENSONIG00000000188	col5a3b	GL831395.1:607539-650390		0.321084	0.0942518	0.0228831	0	1.07614	0	0	0
ENSONIG00000000189	ENSONIG00000000189	MED13L	GL831315.1:255666-340772		3.87024	1.96556	0.633431	0.89193	1.79567	0.077326	0.501801	6.48002
ENSONIG00000000190	ENSONIG00000000190	hdc	GL831420.1:523807-526945		0	0.250969	0	0	0	0	0	0
ENSONIG00000000191	ENSONIG00000000191	ZBTB45	GL831280.1:568155-574854		0.376534	0	0	0	0.274983	0	0	0.995472
ENSONIG00000000192	ENSONIG00000000192	SLC27A2 (1 of 4)	GL831420.1:572422-584647		0.562908	0.465014	0.145138	0.229579	1.20045	6.51552	0.126177	0.278062
ENSONIG00000000193	ENSONIG00000000193	MTFP1	GL831315.1:357102-364791		9.85661	17.9943	1.27524	1.31363	17.589	2.05717	9.1972	3.18824
ENSONIG00000000194	ENSONIG00000000194	dla	GL831280.1:586864-592597		1.72864	0.0990437	0.0177304	0	0.291727	0	0.205572	0.10463
ENSONIG00000000195	ENSONIG00000000195	-	GL831315.1:380998-382463		0.304651	0	0.0949859	0	0.723288	0	0	0
ENSONIG00000000196	ENSONIG00000000196	LMAN2L (1 of 2)	GL831315.1:387521-396926		10.7223	3.41321	0.370772	0	7.43463	1.49729	0.87021	0.516351
ENSONIG00000000197	ENSONIG00000000197	RHOU (1 of 2)	GL831280.1:606636-610877		5.60749	0.172803	0	0	0.154999	0.366531	0.604422	0.0321345
ENSONIG00000000198	ENSONIG00000000198	gatm	GL831420.1:588589-593265		0.0664788	5.33013	0.544404	0.113579	0.743753	0.2478	78.4246	0.103246
ENSONIG00000000199	ENSONIG00000000199	arhgap19	GL831280.1:632607-643887		0.0698074	0.469633	0.0357642	0	5.33594	2.8275	0.606674	5.999
ENSONIG00000000200	ENSONIG00000000200	pde8a	GL831420.1:630107-654258		9.30269	10.9162	2.4357	4.23713	3.26962	3.69649	7.04596	5.59997
ENSONIG00000000201	ENSONIG00000000201	zgc:77391	GL831315.1:404764-409026		4.38785	8.8331	1.44487	0.974811	16.731	0.480217	9.43203	7.13505
ENSONIG00000000202	ENSONIG00000000202	slit1b	GL831280.1:646257-717628		3.94127	0.560951	0.00727985	0	0.207204	0.0491143	0.0437237	0
ENSONIG00000000203	ENSONIG00000000203	-	GL831315.1:410576-414087		0.321805	0.559775	0.0893637	0	8.1888	0	0	0
ENSONIG00000000204	ENSONIG00000000204	olfm2b	GL831395.1:658906-693770		41.0915	0.446574	0.10661	0	0.305327	0.098575	0	0
ENSONIG00000000205	ENSONIG00000000205	pax8	GL831315.1:437123-446164		0.188118	0	25.378	0	0.315208	0	0	0
ENSONIG00000000206	ENSONIG00000000206	-	GL831420.1:657141-670725		7.2387	3.90324	1.39871	2.49357	14.0473	3.22507	2.03252	6.45225
ENSONIG00000000207	ENSONIG00000000207	FSD2	GL831420.1:657141-670725		0.943764	20.0507	0.308828	0.571143	2.56442	0.41935	43.4395	2.37804
ENSONIG00000000208	ENSONIG00000000208	PSD4	GL831315.1:455502-460319		1.70767	7.79864	5.03003	0.878399	13.2319	0.369513	0.655972	72.1408
ENSONIG00000000209	ENSONIG00000000209	WHAMM	GL831420.1:671441-685437		3.63588	4.01167	1.59634	3.2408	5.82371	2.18159	4.47173	2.98772
ENSONIG00000000210	ENSONIG00000000210	MFAP4 (1 of 9)	GL831395.1:718389-720421		0.410765	0	0	74.0882	0.910198	0	0	0
ENSONIG00000000211	ENSONIG00000000211	-	GL831315.1:469461-472547		5.71677	0.622811	0.353985	0.497471	4.26133	0.235754	0.65242	1.16867
ENSONIG00000000212	ENSONIG00000000212	SAPCD2	GL831315.1:481006-492444		13.7154	4.29838	3.98042	0	14.8575	0.118417	0.785918	3.13211
ENSONIG00000000213	ENSONIG00000000213	TRIP10 (1 of 2)	GL831395.1:722906-741198		0.648318	4.21527	1.3206	10.6477	4.02121	2.01826	1.91298	4.33307
ENSONIG00000000214	ENSONIG00000000214	HOMER2	GL831420.1:691652-721522		9.84385	1.90832	2.54396	1.16637	6.5063	2.97878	18.6769	0.300778
ENSONIG00000000215	ENSONIG00000000215	-	GL831731.1:8303-31112		0.832894	2.04359	0.720774	0.166908	1.94927	0.329862	0.379049	2.48085
ENSONIG00000000216	ENSONIG00000000216	-	GL831731.1:60356-62188		1.16422	4.26624	1.40012	2.01818	4.59109	0.641601	0.784117	6.42322
ENSONIG00000000217	ENSONIG00000000217	tmem141	GL831315.1:493859-500730		2.35869	3.16907	1.27703	2.7727	4.61572	6.14328	1.94008	2.22443
ENSONIG00000000218	ENSONIG00000000218	-	GL831731.1:82228-84387		0.792564	1.26797	1.90945	1.03664	4.58379	0.568888	0.23672	2.75732
ENSONIG00000000219	ENSONIG00000000219	zmynd19	GL831315.1:510374-515932		9.94655	8.30415	2.62581	3.7999	22.4973	30.0524	11.6831	11.3997
ENSONIG00000000220	ENSONIG00000000220	-	GL831395.1:743596-756660		0.855289	1.40445	2.33527	5.44494	5.9079	8.04263	4.74104	0.215469
ENSONIG00000000221	ENSONIG00000000221	BTBD1	GL831420.1:734422-740741		35.5521	16.425	3.82126	3.28247	30.3972	17.426	9.24142	18.1245
ENSONIG00000000222	ENSONIG00000000222	bspry	GL831315.1:524132-531961		0	0	2.40606	0.30185	1.49464	2.03714	0.175582	0.0194423
ENSONIG00000000223	ENSONIG00000000223	SLC7A11	GL831793.1:51988-98131		1.03214	0.926728	4.75146	1.08549	0.599102	0.076324	0.649079	68.1932
ENSONIG00000000224	ENSONIG00000000224	-	GL831315.1:575432-580661		0.661031	0	0.0377302	0	0.101872	0	0	0.0665458
ENSONIG00000000225	ENSONIG00000000225	TM6SF1	GL831420.1:741651-749073		1.36129	0.173875	0	0.513409	6.85995	0.194925	0.191401	0.324815
ENSONIG00000000226	ENSONIG00000000226	VAV1	GL831395.1:758104-787745		4.38511	6.352	5.6423	1.27828	6.05908	2.54222	0.944107	81.006
ENSONIG00000000227	ENSONIG00000000227	ubr7	GL831315.1:998696-1011840		11.6417	4.85973	2.86322	6.52724	14.248	63.4071	7.19114	25.7569
ENSONIG00000000228	ENSONIG00000000228	zrsr2	GL831420.1:750520-762560		8.29491	5.72965	2.1874	3.25238	13.6429	4.86204	6.20378	6.56248
ENSONIG00000000229	ENSONIG00000000229	-	GL831420.1:750520-762560		34.0908	65.4341	10.07	7.13787	47.3029	64.1862	14.9678	104.05
ENSONIG00000000230	ENSONIG00000000230	-	GL831909.1:20483-21513		0	0.936988	0	0	0.844243	1.01508	0	0.194556
ENSONIG00000000231	ENSONIG00000000231	asb2a.1	GL831315.1:1021287-1034342		0.62381	9.52108	0.0271612	0.138211	0.18483	0.189551	103.773	0.183233
ENSONIG00000000232	ENSONIG00000000232	-	GL831909.1:34047-44174		0	0	0	0	20.2873	0.0997739	0	0.252718
ENSONIG00000000233	ENSONIG00000000233	-	GL831603.1:71786-77279		0.421803	1.52974	0.344902	0	1.70127	0.0423684	0	13.2068
ENSONIG00000000234	ENSONIG00000000234	-	GL831603.1:102667-127192		1.18825	3.69345	1.05793	1.12416	2.07979	0.523608	1.24157	12.0357
ENSONIG00000000235	ENSONIG00000000235	CD22 (1 of 10)	GL832016.1:35744-41571		1.35759	2.09454	0.718376	0	0.442568	0.38002	0.560693	52.8062
ENSONIG00000000236	ENSONIG00000000236	asb2a.1	GL831315.1:1037393-1046570		0.454364	0	0.453569	0	0	3.63266	61.2836	0
ENSONIG00000000237	ENSONIG00000000237	ppp4r4	GL831315.1:1061188-1074167		24.3386	0.546139	8.01897	0.398472	27.4753	0.16789	2.35005	0.0495271
ENSONIG00000000238	ENSONIG00000000238	-	AERX01074624.1:499-1315		0	1.08417	0.162096	0	13.8484	0.528591	0	3.7499
ENSONIG00000000239	ENSONIG00000000239	-	AERX01072586.2:167-3504		1.47405	3.08638	1.07777	0.63055	9.33302	31.6323	8.78921	4.10525
ENSONIG00000000240	ENSONIG00000000240	-	GL831603.1:142258-151840		0.0365525	0.368708	0.0965715	0	0.407383	0.0811795	0.0787149	3.83811
ENSONIG00000000241	ENSONIG00000000241	-	GL831603.1:163542-175218		2.11776	9.40521	2.53625	1.22757	3.88741	4.03495	2.59546	31.4129
ENSONIG00000000242	ENSONIG00000000242	serpina10a	GL831315.1:1081506-1084109		184.155	59.6103	11.557	9.76892	20.169	1.50678	39.2291	18.8997
ENSONIG00000000243	ENSONIG00000000243	-	GL831603.1:230225-252425		0	3.43188	0	0	0.347125	0	0	3.28697
ENSONIG00000000244	ENSONIG00000000244	-	GL831987.1:1387-4039		0	0	0	0	0.0595041	0	0	0.0395532
ENSONIG00000000245	ENSONIG00000000245	xrcc3	GL831315.1:1096512-1104939		5.12064	5.51027	2.05489	3.28643	8.87325	22.0579	3.68165	10.6503
ENSONIG00000000246	ENSONIG00000000246	brf1b (1 of 2)	GL831315.1:1107095-1118062		10.8304	5.6189	3.34038	2.57719	9.50321	3.24449	2.22533	9.07098
ENSONIG00000000247	ENSONIG00000000247	-	AERX01075951.1:20-1437		0	14.5957	0	0	9.22936	0	0	0.176368
ENSONIG00000000248	ENSONIG00000000248	snrpb	GL831390.1:658-5852		44.9788	76.9244	20.5235	51.541	83.5033	33.8231	90.265	67.0327
ENSONIG00000000249	ENSONIG00000000249	-	GL831528.1:113543-119103		0.400343	0	0	0	0.579102	0.0447643	0.182584	0.107901
ENSONIG00000000250	ENSONIG00000000250	RNF182 (1 of 2)	GL831390.1:7916-10169		33.8699	3.60661	0.730194	0.6557	12.8145	5.01773	2.24242	0.18723
ENSONIG00000000251	ENSONIG00000000251	UBL5	GL831395.1:788544-790443		116.432	99.4485	47.3626	67.589	119.213	174.608	197.468	187.477
ENSONIG00000000252	ENSONIG00000000252	zgc:109913	GL831390.1:11121-14667		1.17594	0	0	0	0	8.03256	0	0
ENSONIG00000000253	ENSONIG00000000253	pin1	GL831395.1:791056-798038		110.099	82.9479	23.2815	35.8666	134.699	132.866	69.0405	90.9272
ENSONIG00000000254	ENSONIG00000000254	ube2c	GL831390.1:24298-27447		2.76027	9.01447	3.81777	6.19231	118.407	709.363	35.238	138.666
ENSONIG00000000255	ENSONIG00000000255	lcor	GL831280.1:747224-825923		0	0	0	0	0	0	0	0.145946
ENSONIG00000000256	ENSONIG00000000256	btbd6b	GL831315.1:1107095-1118062		34.3647	13.2039	3.99732	4.93592	14.8567	58.2604	9.87512	8.84974
ENSONIG00000000257	ENSONIG00000000257	MORN4 (1 of 2)	GL831280.1:828199-848231		0.587574	0	0	0	2.27765	0	0	0
ENSONIG00000000258	ENSONIG00000000258	PRF1 (1 of 15)	GL831395.1:803128-831284		4.85794	3.13722	0.460661	1359.21	1.13659	0.502905	0.738123	5.04907
ENSONIG00000000259	ENSONIG00000000259	polr2j	GL831390.1:32662-34335		77.2857	103.04	19.8307	53.7269	97.5961	120.049	70.9639	181.858
ENSONIG00000000260	ENSONIG00000000260	SLC5A6 (1 of 2)	GL831315.1:1138106-1161806		10.6149	1.47956	13.0505	5.99723	7.70222	2.92254	1.07076	6.1098
ENSONIG00000000261	ENSONIG00000000261	pcif1	GL831390.1:64382-72854		19.6483	24.8924	6.38572	5.33435	19.6538	3.33626	14.8244	17.5264
ENSONIG00000000262	ENSONIG00000000262	hoga1	GL831280.1:867765-895059		2.68985	9.71062	21.7303	208.397	6.148	8.8644	23.6811	2.58803
ENSONIG00000000263	ENSONIG00000000263	-	GL831390.1:81853-105679		5.5985	3.70795	3.50219	0.7826	0.688192	0.108366	0	0.0444909
ENSONIG00000000264	ENSONIG00000000264	CNNM1 (1 of 2)	GL831280.1:900061-918867		3.12842	4.15367	0.0943641	2.99908	1.52862	0.167149	0.0860505	0.237279
ENSONIG00000000265	ENSONIG00000000265	PRF1 (2 of 15)	GL831395.1:867017-885058		0	0	0	0	1.32995	0	0	0
ENSONIG00000000266	ENSONIG00000000266	rpl7l1	GL831315.1:1167815-1172598		14.5544	14.539	7.14708	16.0315	19.7293	13.2481	16.3582	32.2525
ENSONIG00000000267	ENSONIG00000000267	rab43	GL831390.1:116553-120949		67.6144	27.3399	11.3069	9.23205	59.1792	55.9817	7.64299	36.0501
ENSONIG00000000268	ENSONIG00000000268	GOT1 (1 of 2)	GL831280.1:923464-929736		82.2259	270.085	53.9793	2.88619	29.161	26.3272	174.926	31.8267
ENSONIG00000000269	ENSONIG00000000269	cnbpb	GL831390.1:123690-155593		25.5711	13.0673	4.85574	6.80809	6.76036	4.6039	7.11898	7.91472
ENSONIG00000000270	ENSONIG00000000270	si:dkey-1j5.4	GL831315.1:1195692-1198148		0	0	0	0	0	0	0	0
ENSONIG00000000271	ENSONIG00000000271	-	GL831315.1:1244150-1248134		0	0	0	0	0.465964	0.143843	0	0.339725
ENSONIG00000000272	ENSONIG00000000272	si:ch211-15p9.2	GL831390.1:123690-155593		1.07118	1.39275	0.422506	1.67643	1.59447	1.759	1.18658	0.276638
ENSONIG00000000273	ENSONIG00000000273	cnih3	GL831315.1:1359858-1528339		33.7452	2.02905	0.366457	0	0.933384	0.362954	0	0
ENSONIG00000000274	ENSONIG00000000274	-	GL831390.1:123690-155593		8.71181	9.7691	2.41136	3.70743	18.4073	9.34906	4.58443	3.52449
ENSONIG00000000275	ENSONIG00000000275	-	GL831475.1:61742-69053		6.21172	3.242	1.33504	0.249761	14.9667	17.528	2.28224	3.7925
ENSONIG00000000276	ENSONIG00000000276	-	GL831866.1:44349-48883		0	0.070968	0.0134035	0.073025	0.0687815	0	0	0.262642
ENSONIG00000000277	ENSONIG00000000277	smg7	GL831475.1:89581-106663		4.80929	3.85253	1.75914	1.88628	21.1752	1.7832	1.59629	7.02613
ENSONIG00000000278	ENSONIG00000000278	tsen2	GL831390.1:161521-170072		18.9287	5.85721	3.61295	9.10867	21.294	7.34541	12.6445	12.5661
ENSONIG00000000279	ENSONIG00000000279	nkx2.3	GL831280.1:956500-961280		0	79.091	0.0300179	0	0	0	0	0.0184086
ENSONIG00000000280	ENSONIG00000000280	MKRN2OS	GL831390.1:174488-176931		2.50632	0	12.5756	2.92592	0.287048	0.3093	0	0
ENSONIG00000000281	ENSONIG00000000281	mkrn2	GL831390.1:184890-190202		24.3819	70.36	10.8867	11.0972	16.593	20.4372	158.317	13.8331
ENSONIG00000000282	ENSONIG00000000282	-	GL831475.1:116567-147194		0.662458	0.651338	0.271471	0	1.07018	3.36987	0.36169	1.96598
ENSONIG00000000283	ENSONIG00000000283	nmnat2	GL831475.1:151943-163892		173.067	0.701518	0.729972	0.858487	7.32725	0.13558	0	0.895563
ENSONIG00000000284	ENSONIG00000000284	TOX4 (1 of 2)	GL831457.1:52906-65377		6.72485	4.11566	1.92603	1.728	6.29504	18.5361	5.14918	4.08074
ENSONIG00000000285	ENSONIG00000000285	SLC25A28 (1 of 2)	GL831280.1:980547-986627		11.2445	8.56823	6.24622	9.09669	28.8156	1.74559	7.69617	12.9805
ENSONIG00000000286	ENSONIG00000000286	ENTPD7	GL831280.1:988629-998277		7.5282	2.26891	1.65131	1.59044	12.818	0.169616	0.331872	8.27858
ENSONIG00000000287	ENSONIG00000000287	SLC12A6	GL831457.1:72202-93491		7.36515	2.4391	7.00824	1.29276	7.59331	1.00652	0.785023	7.63436
ENSONIG00000000288	ENSONIG00000000288	LAMC2	GL831475.1:166547-175141		0.346863	0.689898	0.0521898	0.187195	0.425775	0	1.70054	0
ENSONIG00000000289	ENSONIG00000000289	FAM107A	GL831390.1:206741-209059		43.655	0	0.229804	26.8807	7.91535	10.6207	50.0889	0
ENSONIG00000000290	ENSONIG00000000290	pik3c2b	GL831390.1:228277-259867		11.7519	4.48555	2.46066	2.71753	7.31823	2.00762	3.83634	6.4984
ENSONIG00000000291	ENSONIG00000000291	nop10	GL831457.1:99173-104012		9.82671	28.4956	10.6261	27.4785	39.4191	125.292	39.7361	85.99
ENSONIG00000000292	ENSONIG00000000292	lpcat4	GL831457.1:136387-148103		0	0.579667	0.193819	0.135715	12.1166	0.496042	0.151669	0.141871
ENSONIG00000000293	ENSONIG00000000293	dhx9	GL831475.1:184170-197293		12.0702	15.9715	5.75878	4.59445	25.3713	9.05813	6.78421	17.7338
ENSONIG00000000294	ENSONIG00000000294	-	GL831280.1:1012433-1042201		0.620498	3.11322	0.559692	0.9259	2.39459	0.0312334	0.43701	5.16657
ENSONIG00000000295	ENSONIG00000000295	atpv0e2	GL831280.1:1053473-1059029		300.729	66.7461	0	0	12.6509	0	0	0
ENSONIG00000000296	ENSONIG00000000296	emc4	GL831457.1:149484-156979		54.0154	69.9925	15.8554	28.7409	34.057	46.5851	70.2584	42.0004
ENSONIG00000000297	ENSONIG00000000297	-	GL831280.1:1075128-1087191		1.03564	1.4405	12.5663	0	17.3698	1.19453	0.615635	1.03678
ENSONIG00000000298	ENSONIG00000000298	aldh4a1	GL831390.1:315790-330537		5.68224	3.68208	22.8707	76.3208	5.94737	4.46432	6.85067	3.08818
ENSONIG00000000299	ENSONIG00000000299	CD22 (2 of 10)	GL831280.1:1094899-1147520		0.636249	1.90859	2.73343	0.806833	1.70384	5.66358	3.79031	19.1389
ENSONIG00000000300	ENSONIG00000000300	-	GL831457.1:158371-171664		1.70421	5.01488	3.11658	2.6334	27.9392	4.29658	1.12794	10.4133
ENSONIG00000000301	ENSONIG00000000301	CD22 (3 of 10)	GL831280.1:1350922-1359558		0	0	0	0	0	0.0728045	0	0.0500085
ENSONIG00000000302	ENSONIG00000000302	CD22 (4 of 10)	GL831280.1:1376818-1390531		0.400157	1.6641	0.298116	0	1.43637	0.0582595	2.52765	8.30101
ENSONIG00000000303	ENSONIG00000000303	CD22 (5 of 10)	GL831280.1:1422510-1426137		0	0.838743	0.0677715	0	0.399187	0.316243	0	2.34567
ENSONIG00000000304	ENSONIG00000000304	rnf123	GL831390.1:332344-445502		15.1424	16.2161	3.90201	4.24442	19.1198	4.22986	184.087	9.59352
ENSONIG00000000305	ENSONIG00000000305	lamc1	GL831475.1:201564-266998		2.82273	12.2241	6.53698	54.1667	11.6832	1.48064	16.3705	1.6043
ENSONIG00000000306	ENSONIG00000000306	C3 (1 of 4)	GL831280.1:1586609-1616849		0.702657	2.05659	0.435881	391.944	2.30856	0.615004	1.67936	0.370954
ENSONIG00000000307	ENSONIG00000000307	-	GL831457.1:171789-197467		1.10602	0.853204	0.435271	0.095539	2.33194	0.0458167	0.162267	2.41916
ENSONIG00000000308	ENSONIG00000000308	GRM7 (1 of 2)	GL831390.1:499441-664709		13.6189	1.9298	0.0871202	0	3.20672	0.557557	0.157667	0.198473
ENSONIG00000000309	ENSONIG00000000309	-	GL831457.1:207559-221582		1.20633	1.01801	0.622554	0.452111	0.806365	3.81909	0.503326	4.57098
ENSONIG00000000310	ENSONIG00000000310	rasal2	GL831475.1:325583-359738		11.3883	40.4928	6.34757	5.73501	44.4383	6.44884	74.3861	9.31388
ENSONIG00000000311	ENSONIG00000000311	ripk3l	GL831457.1:225222-241959		1.43494	0.924137	1.81622	1.33604	1.17515	0.267076	0.386931	15.552
ENSONIG00000000312	ENSONIG00000000312	-	GL831457.1:243433-250764		50.5364	0.221439	0.10005	0.649232	0.0510797	0.0940323	0.126757	0
ENSONIG00000000313	ENSONIG00000000313	-	GL831457.1:251051-259106		0.0375487	0	1.51947	0.992736	0.0283921	0.129829	0	0
ENSONIG00000000314	ENSONIG00000000314	-	GL832059.1:2019-4642		0.0875646	0.548507	0.298597	0	0.568316	0.0717895	0.170524	4.85322
ENSONIG00000000315	ENSONIG00000000315	dlg1l	GL831475.1:368648-466918		19.4287	3.94066	3.47931	1.54737	10.6329	1.05103	3.99043	1.79813
ENSONIG00000000316	ENSONIG00000000316	TIGD1 (1 of 5)	AERX01074510.1:9-1221		0	0	0	0	0	0	0	0.0293934
ENSONIG00000000317	ENSONIG00000000317	-	GL831457.1:265150-271862		0.596281	0	0.146201	0	0.658359	0.126669	0.55287	0.0443096
ENSONIG00000000318	ENSONIG00000000318	-	GL831457.1:372548-379667		0.870705	0.228823	4.59432	0	0.16165	0	0.257283	0.638106
ENSONIG00000000319	ENSONIG00000000319	-	GL831475.1:504444-509979		0	0.233798	0	0.244239	1.98893	0.0675823	0	0.0572564
ENSONIG00000000320	ENSONIG00000000320	-	GL831457.1:419721-435155		0	0	0.0529348	0	0	0	0	0
ENSONIG00000000321	ENSONIG00000000321	-	GL831460.1:217822-221966		0	0	0	0	0	0	0	0
ENSONIG00000000322	ENSONIG00000000322	si:ch1073-59l16.1 (1 of 14)	GL831135.1:33501-36500		0	0	0	0	0.232653	0	0	0
ENSONIG00000000323	ENSONIG00000000323	-	GL831457.1:451251-466668		2.3114	1.85774	2.80479	1.842	1.01663	0.0805876	2.05953	17.7752
ENSONIG00000000324	ENSONIG00000000324	-	GL831457.1:489417-547849		0	0	0	0	0.098872	0	0	0.0331491
ENSONIG00000000325	ENSONIG00000000325	-	GL831460.1:344685-364041		0	0.398385	1.20527	0.390372	0.179532	0	0	0.596906
ENSONIG00000000326	ENSONIG00000000326	-	GL831460.1:391466-393512		0	1.66931	0	0	0	0	0	1.19193
ENSONIG00000000327	ENSONIG00000000327	si:ch1073-59l16.1 (2 of 14)	GL831135.1:45556-52367		1.10002	0.389673	0.0994981	0.194167	9.44778	0.467666	0	2.23305
ENSONIG00000000328	ENSONIG00000000328	si:ch1073-59l16.1 (3 of 14)	GL831135.1:98333-99821		0	0.999869	0	0	2.59902	0	0	0.35071
ENSONIG00000000329	ENSONIG00000000329	-	GL831460.1:407980-427372		0	2.09976	0.0779296	0	0.672987	0	0	0.595902
ENSONIG00000000330	ENSONIG00000000330	si:ch1073-59l16.1 (4 of 14)	GL831135.1:113442-114796		0.731235	0	0.225748	0	0	0	0	0
ENSONIG00000000331	ENSONIG00000000331	si:ch1073-59l16.1 (5 of 14)	GL831135.1:222688-225300		0	0.540365	0	0	0	0	0	6.61034
ENSONIG00000000332	ENSONIG00000000332	NLRP6 (1 of 51)	GL831460.1:543308-544633		4.99283	12.5148	5.31988	3.85783	2.41492	0.230536	8.23661	63.9017
ENSONIG00000000333	ENSONIG00000000333	si:ch1073-59l16.1 (6 of 14)	GL831135.1:245795-248274		0	3.21104	1.43052	0	1.41747	0	0	74.5023
ENSONIG00000000334	ENSONIG00000000334	polh	GL831135.1:258822-263943		7.09449	3.04738	2.12587	2.48798	10.2808	11.7092	2.24677	19.0553
ENSONIG00000000335	ENSONIG00000000335	ENDOD1 (5 of 22)	GL832410.1:3512-5376		0	0	0	0	0	0	0	0
ENSONIG00000000336	ENSONIG00000000336	NLRP6 (2 of 51)	GL831684.1:2172-12364		0.759973	1.64522	1.1292	0.68778	0.605402	0.0721161	0.526618	11.4484
ENSONIG00000000337	ENSONIG00000000337	GTPBP2 (1 of 2)	GL831135.1:266871-275147		4.076	11.1883	2.32371	1.60172	17.5019	0.991321	36.5718	11.2789
ENSONIG00000000338	ENSONIG00000000338	-	GL831684.1:100778-121578		0.902696	2.87398	2.35634	1.51113	1.6339	0.268415	3.26466	7.85358
ENSONIG00000000339	ENSONIG00000000339	-	GL831453.1:6404-8594		0	0	0	0	0	0	0	0
ENSONIG00000000340	ENSONIG00000000340	-	GL831453.1:13452-16450		0	0	91.1883	125.252	0.144475	0	0	0.20119
ENSONIG00000000341	ENSONIG00000000341	-	GL831684.1:142805-147738		12.8504	12.5481	9.01267	6.5068	3.04189	0.993783	14.4395	38.5763
ENSONIG00000000342	ENSONIG00000000342	-	GL831453.1:63992-66003		0	0	0.108544	99.3764	0	0.0855629	0	0
ENSONIG00000000343	ENSONIG00000000343	ins	GL831453.1:137840-139107		0	0	0	2.27057	0	0	0	0
ENSONIG00000000344	ENSONIG00000000344	ccdc130	GL831280.1:1617777-1624225		10.7479	15.3353	3.63669	4.23776	20.1638	28.1061	6.29032	8.37735
ENSONIG00000000345	ENSONIG00000000345	NIPAL4	GL831453.1:140485-151243		0	0	3.16576	1.44127	11.5761	10.4193	1.90311	0
ENSONIG00000000346	ENSONIG00000000346	OTOR	GL831135.1:278135-278995		0	12.2874	0	0	0	0	0	1.19684
ENSONIG00000000347	ENSONIG00000000347	pcsk2	GL831135.1:295004-336452		84.6309	2.44365	0.0548358	0.0583098	0.403957	15.2302	1.74644	0.64262
ENSONIG00000000348	ENSONIG00000000348	gria1b	GL831453.1:174294-275456		7.51929	0.261615	0	0	1.71116	0	0	0.0145905
ENSONIG00000000349	ENSONIG00000000349	wdr83	GL831280.1:1636229-1640218		8.43937	24.4235	4.22584	8.1089	27.7081	9.53263	17.3838	16.8601
ENSONIG00000000350	ENSONIG00000000350	WDR83OS	GL831280.1:1640710-1644913		23.0856	69.84	19.1161	36.9017	26.3195	55.2885	65.7582	54.189
ENSONIG00000000351	ENSONIG00000000351	cacna1ab	GL831280.1:1702038-1850137		3.82242	0.171035	0.106644	0	1.3434	0.0147384	0	0.00600526
ENSONIG00000000352	ENSONIG00000000352	BFSP1	GL831135.1:295004-336452		0.860755	0.428996	0.101204	0.102463	0.137862	67.0981	4.99431	0.115239
ENSONIG00000000353	ENSONIG00000000353	-	GL831135.1:346689-354213		3.16403	0.176011	0.0923744	0	1.58485	0.0466782	0	1.01228
ENSONIG00000000354	ENSONIG00000000354	plek	GL831135.1:369712-376921		2.888	8.73613	7.5327	0.666818	0.729463	0.748796	2.14638	79.6503
ENSONIG00000000355	ENSONIG00000000355	pcdh15a	GL831135.1:443870-611356		1.06028	1.13185	0.0111393	5.94086	2.77748	1.35424	0.063087	0.384162
ENSONIG00000000356	ENSONIG00000000356	-	GL831453.1:435471-436001		0	0	0	0	1.39298	0	0	0
ENSONIG00000000357	ENSONIG00000000357	ncf1	GL831453.1:503429-512059		6.19089	6.28723	9.03889	0.807843	2.45415	0.43599	1.37681	237.049
ENSONIG00000000358	ENSONIG00000000358	st6gal1	GL831453.1:525597-534670		31.1189	1.27666	0.15734	0	2.96629	0.0660248	0.52915	2.68369
ENSONIG00000000359	ENSONIG00000000359	tgm8 (1 of 5)	GL831191.1:8203-14607		0	0	0.028198	1.97268	5.94245	0.0429007	0.718183	0.0406688
ENSONIG00000000360	ENSONIG00000000360	tomm34 (1 of 2)	GL831191.1:15550-29413		1.67366	0.719729	0.839474	1.12998	10.751	1.24698	3.5482	8.03539
ENSONIG00000000361	ENSONIG00000000361	-	GL831453.1:541105-555853		0.782373	0	6.39165	14.3294	0.857974	0	0	0.411255
ENSONIG00000000362	ENSONIG00000000362	-	AERX01074731.1:2-2196		0	0	0.185294	0	0.480538	0	0	0.308566
ENSONIG00000000363	ENSONIG00000000363	YWHAB (1 of 2)	GL831191.1:40176-62676		185.837	210.22	71.927	35.8555	89.1035	88.2711	80.1765	474.983
ENSONIG00000000364	ENSONIG00000000364	sox18	GL831618.1:19925-22794		2.00793	3.28261	1.56213	0.970385	0.846287	0.12804	1.05917	0.91986
ENSONIG00000000365	ENSONIG00000000365	tcea2	GL831618.1:119054-125496		1.81323	0.32875	0.102192	0.283536	2.97737	8.18862	0.654655	0.0239925
ENSONIG00000000366	ENSONIG00000000366	RIMS4	GL831191.1:117456-159865		0.667535	0.576413	0	0	0.477018	0.13388	0	0
ENSONIG00000000367	ENSONIG00000000367	abraa	GL831191.1:176640-189134		0	0	0	0.289419	0.814004	0.0804778	89.377	0
ENSONIG00000000368	ENSONIG00000000368	dkk1a	GL831135.1:647623-649810		0.279247	1.27671	0	0	0.26027	0.246338	0.168014	0
ENSONIG00000000369	ENSONIG00000000369	prkg1a	GL831135.1:651233-744419		8.29884	9.39634	7.36551	23.1238	6.33588	0.492002	0.594535	0.84121
ENSONIG00000000370	ENSONIG00000000370	LSM3 (1 of 2)	GL831191.1:215804-219655		12.1415	20.4419	5.16469	10.0931	125.06	16.4721	10.0948	37.2644
ENSONIG00000000371	ENSONIG00000000371	SLC6A6 (1 of 2)	GL831191.1:302225-316822		1.06252	0.485054	0.214221	0	1.91902	0.0576905	0	19.0871
ENSONIG00000000372	ENSONIG00000000372	rgs19	GL831618.1:131136-135829		2.40866	0.615054	1.82649	1.69523	1.94503	3.00053	1.40461	29.0404
ENSONIG00000000373	ENSONIG00000000373	grip2b	GL831191.1:334224-422740		0.0492426	0	0	0	0.105424	0.0192079	0	0.0245586
ENSONIG00000000374	ENSONIG00000000374	A2ML1 (1 of 14)	GL832198.1:62-11569		0.957746	0	0.501329	213.695	0.19588	0	0	0.143325
ENSONIG00000000375	ENSONIG00000000375	TRBV25-1	GL831153.1:780-10150		7.47265	29.5672	11.4653	3.36996	1.9273	3.54073	1.47097	38.7281
ENSONIG00000000376	ENSONIG00000000376	paplna	GL831153.1:11271-34913		1.56191	1.19429	0.453608	0.0430267	0.540184	3.8547	0.558726	0.96093
ENSONIG00000000377	ENSONIG00000000377	SGMS1	GL831135.1:761745-770066		10.5521	16.6456	19.928	25.7835	16.7879	4.87475	10.6188	41.8067
ENSONIG00000000378	ENSONIG00000000378	psen1	GL831153.1:44881-57033		10.3661	13.0089	9.74668	4.29911	16.9655	0.560207	4.50285	20.8952
ENSONIG00000000379	ENSONIG00000000379	minpp1a	GL831135.1:791709-805916		20.6745	38.7579	11.0787	298.09	4.69809	1.60689	4.01086	13.933
ENSONIG00000000380	ENSONIG00000000380	-	GL831191.1:581929-605109		9.96647	0.444783	0.0200257	0	1.18846	1.06448	0.13285	0.0318083
ENSONIG00000000381	ENSONIG00000000381	papss2a	GL831135.1:808480-821529		3.22625	1.77644	9.54934	18.2504	3.12553	0.658381	0.171372	1.9109
ENSONIG00000000382	ENSONIG00000000382	erh	GL831153.1:57926-65086		6.86417	6.33725	5.02109	2.77162	14.3772	10.3886	3.81273	20.9833
ENSONIG00000000383	ENSONIG00000000383	si:ch211-168d23.3	GL831153.1:70247-79015		0.412751	0	0	0	0.0251138	0	0	0.02614
ENSONIG00000000384	ENSONIG00000000384	ptprt	GL831191.1:768521-1063571		14.0178	0.649511	0.0949882	0.0383834	2.85996	0.140209	0.133591	0.0383274
ENSONIG00000000385	ENSONIG00000000385	exd2	GL831153.1:83815-89048		5.69942	3.52599	1.20406	1.83924	10.6468	51.1276	13.9026	4.24154
ENSONIG00000000386	ENSONIG00000000386	ptena	GL831135.1:824216-836068		29.202	28.0476	8.78041	13.3328	9.56291	5.56926	8.55785	68.9767
ENSONIG00000000387	ENSONIG00000000387	numb	GL831153.1:92415-108994		12.8229	14.596	7.07588	6.08419	12.7966	1.0113	5.84497	10.0022
ENSONIG00000000388	ENSONIG00000000388	fas	GL831135.1:876247-880706		5.20896	8.19051	6.38339	1.69175	3.30879	0.994871	0.426472	58.2311
ENSONIG00000000389	ENSONIG00000000389	galnt16	GL831153.1:135779-174043		66.2723	13.2125	0.220124	66.522	1.9907	0.271204	5.34978	1.51731
ENSONIG00000000390	ENSONIG00000000390	-	GL831135.1:892636-894280		0.688645	14.1807	0.372374	1.1283	8.62914	26.8869	2.76654	6.67561
ENSONIG00000000391	ENSONIG00000000391	-	GL831135.1:905296-908637		24.0716	58.4047	20.0076	23.2935	45.379	264.575	33.657	55.8627
ENSONIG00000000392	ENSONIG00000000392	rspo4	GL831191.1:1123772-1160304		0	0	0.0652082	0	0.461011	0	0	0
ENSONIG00000000393	ENSONIG00000000393	CHD6	GL831191.1:1169369-1213872		0.292888	0.0645842	0.0611791	0.031296	1.16244	0.143152	0	0.390189
ENSONIG00000000394	ENSONIG00000000394	STX10	GL831280.1:1878991-1889268		12.2197	9.89288	6.44429	6.30845	10.5125	3.52958	6.88591	14.1211
ENSONIG00000000395	ENSONIG00000000395	wdr96	GL831135.1:908971-925969		1.32408	0.227565	1.38047	0.293862	14.8559	0.187648	0.264562	0.541435
ENSONIG00000000396	ENSONIG00000000396	sfr1	GL831135.1:926138-927027		1.08689	0.96699	1.49193	4.38732	43.471	66.458	13.0481	4.87531
ENSONIG00000000397	ENSONIG00000000397	col17a1b	GL831135.1:934337-954091		4.03821	6.07438	1.09708	1.96438	3.83081	1.03444	13.0876	0.419544
ENSONIG00000000398	ENSONIG00000000398	vps39	GL831153.1:185295-205533		5.037	3.26996	1.39514	1.75536	10.1625	1.58063	3.45756	7.24694
ENSONIG00000000399	ENSONIG00000000399	NACC1 (1 of 2)	GL831280.1:1908205-1919878		0	0.51698	0	0.298735	0.654257	0	0	0.44177
ENSONIG00000000400	ENSONIG00000000400	trmt1	GL831280.1:1935023-1963164		5.11721	8.84119	1.9218	3.59942	38.5416	32.6061	8.18351	11.5379
ENSONIG00000000401	ENSONIG00000000401	FAM65C	GL831191.1:1303223-1326995		0.711764	3.93366	0.759423	0.344429	0.261319	7.02233	2.06811	11.2268
ENSONIG00000000402	ENSONIG00000000402	SLK (1 of 2)	GL831135.1:956656-975625		11.9738	12.0304	4.44571	0.300251	11.891	1.27334	1.95642	29.0433
ENSONIG00000000403	ENSONIG00000000403	GANC	GL831153.1:220068-243709		1.08162	3.59229	1.4999	5.39307	7.9529	0.96136	16.5324	5.28666
ENSONIG00000000404	ENSONIG00000000404	mcm2	GL831191.1:1383306-1390847		1.4698	10.6876	3.32984	2.64266	75.0128	76.5804	7.92684	69.4128
ENSONIG00000000405	ENSONIG00000000405	man2b1	GL831280.1:1935023-1963164		4.55439	21.4538	7.27058	9.63417	8.7059	22.788	8.07416	23.1224
ENSONIG00000000406	ENSONIG00000000406	-	GL831135.1:980355-982057		0	0	0	0	0	0	0	0
ENSONIG00000000407	ENSONIG00000000407	sh3pxd2ab	GL831135.1:989730-1039078		2.35317	5.83162	5.59695	0.836491	4.70535	0.345792	6.75643	4.31415
ENSONIG00000000408	ENSONIG00000000408	lmcd1	GL831191.1:1400824-1405864		7.0394	53.6082	4.50713	0	2.36955	0.123062	0.619859	0.238653
ENSONIG00000000409	ENSONIG00000000409	NEURL1 (1 of 2)	GL831135.1:1044139-1078483		17.1353	1.69985	1.05979	0.175467	8.67567	1.79487	0.270313	0.263526
ENSONIG00000000410	ENSONIG00000000410	SORCS3 (1 of 2)	GL831135.1:1142932-1188252		1.71852	0	0.014152	0	0.568432	0.0578714	0	0
ENSONIG00000000411	ENSONIG00000000411	abhd6a	GL831191.1:1413061-1421827		15.4116	11.3915	9.90863	25.8243	15.422	1.36237	1.65854	32.1408
ENSONIG00000000412	ENSONIG00000000412	-	GL832222.1:1527-6527		6.44278	3.24586	3.75888	0	4.54931	2.87289	0.818126	36.971
ENSONIG00000000413	ENSONIG00000000413	pxk	GL831191.1:1428116-1458223		15.7171	19.0315	5.69999	20.177	17.9371	13.0935	14.0099	41.2322
ENSONIG00000000414	ENSONIG00000000414	-	GL831375.1:62962-110240		5.45085	3.1341	2.14497	1.06411	2.49581	2.90732	1.06814	6.50004
ENSONIG00000000415	ENSONIG00000000415	-	GL831375.1:140052-161776		0.114967	0	0.0245667	0.379799	0.873548	0.0331511	0	0.448821
ENSONIG00000000416	ENSONIG00000000416	pdhb	GL831191.1:1458258-1465991		89.4531	229.124	46.0645	19.0295	67.6686	77.7825	141.123	77.9221
ENSONIG00000000417	ENSONIG00000000417	dak	GL831375.1:187496-195802		1.95318	4.39349	23.359	47.805	5.83664	4.5457	1.70028	4.11962
ENSONIG00000000418	ENSONIG00000000418	znf106a	GL831153.1:246244-261701		2.13905	56.5446	0.479352	0.723266	18.2246	0.218427	95.6511	3.29551
ENSONIG00000000419	ENSONIG00000000419	SORCS1 (1 of 2)	GL831135.1:1197460-1246353		8.1328	0.413771	0.141741	0	1.31484	0.699438	0	0.271755
ENSONIG00000000420	ENSONIG00000000420	tmem206	GL831153.1:261953-268538		1.66522	23.2744	14.3036	48.8525	23.236	1.2412	0.458687	17.7044
ENSONIG00000000421	ENSONIG00000000421	add3b	GL831135.1:1274339-1297577		79.8537	51.3233	9.34792	6.14851	11.4192	2.41553	3.06886	6.05302
ENSONIG00000000422	ENSONIG00000000422	kctd6a	GL831191.1:1479494-1506376		21.9061	6.90204	1.52019	4.89137	17.1608	12.6033	14.0891	7.15643
ENSONIG00000000423	ENSONIG00000000423	nenf	GL831153.1:269229-271978		1.62114	4.63737	3.48267	2.73595	28.5522	1.11369	4.98146	0
ENSONIG00000000424	ENSONIG00000000424	exoc6b	GL831375.1:198615-327726		1.52492	1.93389	0.256747	0.213216	6.14968	1.14109	1.33422	3.04787
ENSONIG00000000425	ENSONIG00000000425	CCDC71	GL831191.1:1554162-1555158		6.63424	1.92171	1.40734	1.38696	25.8791	12.0388	3.14901	7.34329
ENSONIG00000000426	ENSONIG00000000426	stab1	GL831191.1:1617242-1739000		1.49521	19.1386	1.43094	0.138475	1.92753	0.261655	0.547661	43.2071
ENSONIG00000000427	ENSONIG00000000427	ezra	GL831153.1:273012-284154		1.56782	2.7753	190.448	57.5668	7.78347	0.778028	2.17299	0.104581
ENSONIG00000000428	ENSONIG00000000428	-	GL831143.1:21378-94513		0.179315	2.7351	1.00513	227.349	1.23695	0.481494	2.29232	10.2296
ENSONIG00000000429	ENSONIG00000000429	KCNK3 (1 of 2)	GL831153.1:285622-287967		2.32179	0	0.1225	0	13.5753	0.0856774	1.45682	0
ENSONIG00000000430	ENSONIG00000000430	2015-03-02	GL831153.1:293878-301345		6.33513	27.3596	103.139	178.341	15.4836	86.839	19.7832	1.23549
ENSONIG00000000431	ENSONIG00000000431	-	GL831143.1:99016-108254		0	0.243479	0.139854	291.811	0.0569621	0.104867	0.133745	0.62801
ENSONIG00000000432	ENSONIG00000000432	MXI1 (1 of 2)	GL831135.1:1299412-1305177		10.2139	6.4468	3.30614	0	1.37817	0	0	0.345649
ENSONIG00000000433	ENSONIG00000000433	HHIPL2	GL831153.1:307558-315807		0.395902	0.201354	0.0702918	0	0.675219	0	0.108988	0
ENSONIG00000000434	ENSONIG00000000434	smndc1	GL831135.1:1307556-1312393		76.9474	64.8134	23.8679	29.0945	70.6448	30.8033	70.4134	72.838
ENSONIG00000000435	ENSONIG00000000435	rps12	GL831143.1:114007-115300		6731.89	37570.2	6916.18	49966.2	9445.91	3027.04	21535.5	17909
ENSONIG00000000436	ENSONIG00000000436	eya4	GL831143.1:118462-143248		0.328131	28.2914	0.563121	0.63814	2.37937	0.845797	74.4159	0.327299
ENSONIG00000000437	ENSONIG00000000437	wdr32	GL831153.1:324726-335784		5.45928	4.65856	1.64765	1.21194	6.19061	0.763286	3.63407	3.20674
ENSONIG00000000438	ENSONIG00000000438	bnip4	GL831135.1:1325880-1335091		99.5888	98.091	31.692	74.3914	41.5075	42.248	35.5446	44.0227
ENSONIG00000000439	ENSONIG00000000439	fetub (1 of 4)	AERX01074356.1:20-2703		0	0	0	4240.23	1.94352	1.07324	0	0
ENSONIG00000000440	ENSONIG00000000440	-	GL831833.1:55962-58809		4.4408	0.507973	0	0	0	0	0.524689	0
ENSONIG00000000441	ENSONIG00000000441	TRIM35 (2 of 54)	GL831143.1:176409-179293		0	1.98893	1.13178	0	0.448629	0.203144	4.64521	6.52216
ENSONIG00000000442	ENSONIG00000000442	CPXM1 (1 of 2)	GL831153.1:335906-350262		3.64719	12.5764	3.08512	2.83732	3.06484	0.463806	3.7061	4.54637
ENSONIG00000000443	ENSONIG00000000443	ppp2r2d	GL831135.1:1325880-1335091		39.8046	32.2362	10.8616	22.0277	26.307	27.4825	21.876	33.255
ENSONIG00000000444	ENSONIG00000000444	NLRP6 (3 of 51)	GL831565.1:41020-118987		3.57564	14.317	3.06217	2.31737	3.67121	0.217203	6.08221	91.3329
ENSONIG00000000445	ENSONIG00000000445	-	GL831565.1:168340-168914		0	0	0	0	0	0	0	16.2863
ENSONIG00000000446	ENSONIG00000000446	tcf21	GL831143.1:198718-201056		0.2417	12.2094	6.6618	3.7911	1.64086	0.0530061	0.235841	19.8161
ENSONIG00000000447	ENSONIG00000000447	tbpl1	GL831143.1:225768-229903		15.8635	2.23643	1.35131	1.07769	46.1581	15.3279	3.48366	19.0261
ENSONIG00000000448	ENSONIG00000000448	-	GL832171.1:2892-7845		1.8345	1.40305	7.45382	0.34367	8.71552	0.263516	1.83929	2.86919
ENSONIG00000000449	ENSONIG00000000449	-	GL831153.1:353585-367388		6.45558	9.22382	2.40111	4.33579	18.0264	8.2027	5.02525	5.83523
ENSONIG00000000450	ENSONIG00000000450	slc2a12	GL831143.1:231916-241229		2.44172	8.55128	219.744	2.59807	7.68406	1.12429	16.2778	0.281637
ENSONIG00000000451	ENSONIG00000000451	ebf3	GL831135.1:1347642-1416221		21.5338	2.81881	0.0886041	0.0575488	0.923727	0	9.15676	0.0698933
ENSONIG00000000452	ENSONIG00000000452	sgk1	GL831143.1:249065-255623		77.1474	47.6762	83.7883	77.9291	23.4397	1.09324	68.4815	27.5466
ENSONIG00000000453	ENSONIG00000000453	cyp26b1	GL831375.1:372466-409316		4.28947	9.33637	1.33583	0.933302	1.59787	0.119091	3.6443	1.08822
ENSONIG00000000454	ENSONIG00000000454	-	GL831153.1:371452-389783		55.6837	72.4258	27.9135	32.0634	80.5845	174.957	85.6206	155.3
ENSONIG00000000455	ENSONIG00000000455	TRIM35 (3 of 54)	GL831191.1:1617242-1739000		0.876372	5.8317	1.16462	0.266965	1.10346	0.0753192	0.399329	15.6611
ENSONIG00000000456	ENSONIG00000000456	manba	GL831153.1:371452-389783		6.79451	3.92073	1.93285	3.5787	5.64066	9.81204	1.52444	9.10175
ENSONIG00000000457	ENSONIG00000000457	nisch	GL831191.1:1754270-1778556		2.30709	1.90141	0.527721	0.542936	4.27003	0.234147	0.452828	4.67535
ENSONIG00000000458	ENSONIG00000000458	gata5	GL831399.1:142331-152133		0	23.8495	0.700866	0.513181	4.71026	0	0	0.212399
ENSONIG00000000459	ENSONIG00000000459	aldh8a1	GL831143.1:326173-330293		1.1297	0.63721	49.2663	75.1087	2.7362	0.144228	0.219242	0.30455
ENSONIG00000000460	ENSONIG00000000460	hbs1l	GL831143.1:333920-358512		19.2249	16.4072	6.57581	9.0987	24.2633	6.5557	65.1232	22.2977
ENSONIG00000000461	ENSONIG00000000461	dysf	GL831375.1:652809-739234		2.19976	4.96857	2.53695	3.43275	1.08482	0.439518	32.9286	0.247771
ENSONIG00000000462	ENSONIG00000000462	fam203a	GL831191.1:1801138-1809063		3.36229	4.14293	1.8887	4.00503	18.1511	13.5862	4.92378	15.1268
ENSONIG00000000463	ENSONIG00000000463	POGK (1 of 9)	GL831399.1:188710-189791		0	0	0	0	0	0	0	0.0507823
ENSONIG00000000464	ENSONIG00000000464	hck	GL831399.1:275290-284094		16.5169	20.5452	23.1713	3.9522	4.34774	2.01814	11.7159	226.345
ENSONIG00000000465	ENSONIG00000000465	tm9sf4	GL831399.1:290589-310203		19.3582	11.0416	4.20799	8.5628	15.9416	3.58451	3.03396	34.7803
ENSONIG00000000466	ENSONIG00000000466	zgc:153675	GL831191.1:1810457-1816565		3.24292	6.19498	1.62022	5.27125	10.4521	32.764	3.70264	14.1328
ENSONIG00000000467	ENSONIG00000000467	sos2	GL831153.1:393535-431097		1.67922	1.43249	0.712022	0.485465	4.87241	0.435142	1.15131	3.88321
ENSONIG00000000468	ENSONIG00000000468	rbbp5	GL831191.1:1818942-1835364		6.18265	7.22147	3.39493	2.13586	26.8552	13.3076	8.55499	13.5834
ENSONIG00000000469	ENSONIG00000000469	cmyb	GL831143.1:367035-375914		0.374899	1.03596	2.96776	0.0683376	3.15696	0.0676704	0.470427	70.0288
ENSONIG00000000470	ENSONIG00000000470	mgmt	GL831135.1:1422622-1442425		4.59098	10.5144	1.1868	4.401	71.2944	3.30845	1.0546	2.27145
ENSONIG00000000471	ENSONIG00000000471	ptpreb	GL831135.1:1506322-1530645		18.9355	0.597647	0	0.0854946	1.34053	0	0.100226	0
ENSONIG00000000472	ENSONIG00000000472	ippk	GL831191.1:1837303-1861807		5.19132	4.11725	1.76933	1.05042	8.7456	5.76265	6.48153	16.1306
ENSONIG00000000473	ENSONIG00000000473	PLAGL2	GL831399.1:324547-327421		0	0.381155	0.077026	0	0.0702183	0	0	1.08866
ENSONIG00000000474	ENSONIG00000000474	pofut1	GL831399.1:379115-383781		3.66862	4.53006	2.64667	10.6571	28.6179	17.8208	3.06807	6.77113
ENSONIG00000000475	ENSONIG00000000475	ecm2	GL831191.1:1865378-1888554		1.07994	1.07125	0.152689	0.106419	0.227043	0	1.85397	0.469534
ENSONIG00000000476	ENSONIG00000000476	PDE7B	GL831143.1:417788-430900		4.11866	1.39891	0.887614	0.423361	14.7885	0.89553	0.241681	2.90608
ENSONIG00000000477	ENSONIG00000000477	l2hgdh	GL831153.1:432995-437522		4.41888	5.27562	49.8225	304.732	16.1348	61.6336	14.0468	11.4401
ENSONIG00000000478	ENSONIG00000000478	KLHL7 (1 of 2)	GL831399.1:388401-397544		0.198294	1.09455	0.160927	0.172685	21.3059	23.7133	2.56138	1.72617
ENSONIG00000000479	ENSONIG00000000479	bgl3	GL831191.1:1894719-1902565		0.193561	0.69228	0.12154	0	0	0	1.91583	0.143378
ENSONIG00000000480	ENSONIG00000000480	atp5s	GL831153.1:439029-444602		7.66542	14.4698	4.7957	5.2393	8.68394	11.1796	21.3679	6.50946
ENSONIG00000000481	ENSONIG00000000481	crata (1 of 4)	GL831399.1:402091-416529		0	0	0	0	0.329946	35.0383	2.02847	0
ENSONIG00000000482	ENSONIG00000000482	-	GL831143.1:447695-450186		0	1.96541	1.07723	0.292902	23.3753	33.2134	7.24238	26.5659
ENSONIG00000000483	ENSONIG00000000483	cdkl1	GL831153.1:445443-451853		4.30659	2.6984	6.32666	0.585291	3.05843	1.46985	0.340245	1.03264
ENSONIG00000000484	ENSONIG00000000484	armc1l	GL831143.1:451727-457232		13.5368	12.2219	8.00075	2.10318	30.2315	34.558	4.04495	34.6744
ENSONIG00000000485	ENSONIG00000000485	fam196ab	GL831135.1:1588838-1610478		2.54357	0.319595	0	0	0.347192	0	0.173791	0.0245843
ENSONIG00000000486	ENSONIG00000000486	map4k5	GL831153.1:455505-481963		12.6296	16.9642	3.87359	11.8776	17.6976	2.22043	4.50016	19.1306
ENSONIG00000000487	ENSONIG00000000487	IDO1	GL831135.1:1615948-1621756		0.115462	0	0.0737131	0	0.292906	0.122042	0	0.242744
ENSONIG00000000488	ENSONIG00000000488	ogn	GL831191.1:1932413-1939519		1.15365	15.0924	0.400699	0	0	0.122545	11.3239	0.233916
ENSONIG00000000489	ENSONIG00000000489	MAP7 (1 of 2)	GL831143.1:457399-479825		3.84951	3.34141	2.76843	0.354338	2.03672	8.27309	0.90934	0.0085896
ENSONIG00000000490	ENSONIG00000000490	kif3b	GL831399.1:423810-435754		7.02213	4.37066	2.04699	0.817983	29.3836	9.25101	2.20439	5.05772
ENSONIG00000000491	ENSONIG00000000491	nol8	GL831191.1:1954835-1967320		1.82992	2.53584	1.06797	2.51953	6.87995	2.02662	2.41489	6.7996
ENSONIG00000000492	ENSONIG00000000492	adam12	GL831135.1:1669847-1757553		2.46413	1.66628	2.77227	0.279859	2.40734	0.0389769	3.08096	0.980517
ENSONIG00000000493	ENSONIG00000000493	PCMTD2	GL831399.1:438751-441610		14.9971	9.60197	2.09247	4.08277	5.58344	2.02317	1.79169	6.0766
ENSONIG00000000494	ENSONIG00000000494	gpr37l1a	GL831191.1:1969073-1974992		7.0104	1.41256	0.0701384	0	2.46886	0.0424405	0.789785	0
ENSONIG00000000495	ENSONIG00000000495	ppp1r14c	GL831143.1:492322-515220		25.4445	155.898	1.56981	1.60517	5.05731	0	97.7983	0.166185
ENSONIG00000000496	ENSONIG00000000496	atp2b4	GL831191.1:2115785-2208741		3.72104	1.66746	1.75	0.704622	12.4624	0.0424213	0.391603	6.13564
ENSONIG00000000497	ENSONIG00000000497	iyd	GL831143.1:521695-526772		2.00337	2.14011	30.1761	73.0006	3.748	0.760808	0.966153	0.520217
ENSONIG00000000498	ENSONIG00000000498	adhfe1	GL831375.1:762608-770589		5.30331	11.0937	46.0395	23.4973	7.93864	9.63872	8.999	5.05903
ENSONIG00000000499	ENSONIG00000000499	myt1b	GL831399.1:453847-497271		2.20171	0.0590361	0.0341954	0	2.68869	0.0670679	0	0.309059
ENSONIG00000000500	ENSONIG00000000500	sec63	GL831143.1:526811-540036		16.0507	23.4765	8.92213	18.3592	22.2286	30.8125	64.1255	22.7027
ENSONIG00000000501	ENSONIG00000000501	scml4	GL831143.1:550757-561978		6.26553	1.89445	0.859366	0.431993	1.35876	0.202889	0.501629	16.7157
ENSONIG00000000502	ENSONIG00000000502	nbas	GL831143.1:724642-902736		2.72679	2.086	0.985484	1.16136	5.85444	6.44969	2.7486	5.20509
ENSONIG00000000503	ENSONIG00000000503	-	GL831375.1:775389-900628		0	0	0	0	0	0.317643	0	0
ENSONIG00000000504	ENSONIG00000000504	-	GL831375.1:775389-900628		0	0	0	0	0	0	0	0
ENSONIG00000000505	ENSONIG00000000505	tbc1d22b	GL831399.1:589705-608020		3.79293	1.20622	1.37298	0.27797	3.94947	0.312996	0.326232	9.31924
ENSONIG00000000506	ENSONIG00000000506	dhx32b	GL831135.1:1768726-1775793		3.52621	4.9485	1.06852	0	0.379766	0	0	0
ENSONIG00000000507	ENSONIG00000000507	EDRF1	GL831135.1:1777226-1789730		2.73825	2.70219	1.30114	1.28804	28.344	14.7648	7.05692	11.6137
ENSONIG00000000508	ENSONIG00000000508	-	GL832443.1:3729-5305		0.99517	0.895106	1.03273	0	0.825586	0	0	22.9515
ENSONIG00000000509	ENSONIG00000000509	atl1	GL831153.1:483830-497459		49.2377	1.63336	0	0	1.78628	0	0	0.043941
ENSONIG00000000510	ENSONIG00000000510	-	GL831135.1:1836681-1873236		12.7516	3.05269	0.837206	0.206165	5.84652	0.143285	0.483505	0.25873
ENSONIG00000000511	ENSONIG00000000511	prosc	GL831399.1:622470-626588		43.2004	33.6628	12.8746	12.4995	16.1332	37.0068	13.2996	18.8357
ENSONIG00000000512	ENSONIG00000000512	cept1b	GL831191.1:2231058-2250966		7.16959	6.82589	2.49359	3.74094	7.07838	11.3644	13.0311	11.1184
ENSONIG00000000513	ENSONIG00000000513	ddx1	GL831143.1:902780-909261		23.0241	23.0846	6.8646	8.57732	53.6219	24.9225	99.9477	39.1285
ENSONIG00000000514	ENSONIG00000000514	sav1	GL831153.1:500749-507561		4.04755	23.9545	4.77057	6.9129	37.4527	11.7329	26.8775	9.98526
ENSONIG00000000515	ENSONIG00000000515	zranb1b	GL831135.1:1878581-1902549		78.3791	30.8211	4.03131	3.75927	22.2269	3.62953	72.8445	3.73796
ENSONIG00000000516	ENSONIG00000000516	nin	GL831153.1:507600-539925		0.586611	8.25962	0.692441	0.319582	6.2975	6.74073	2.18329	10.9383
ENSONIG00000000517	ENSONIG00000000517	dram2b	GL831191.1:2253934-2259548		7.8871	19.1624	8.97189	13.3489	30.6692	44.4834	9.8827	61.4857
ENSONIG00000000518	ENSONIG00000000518	tmed4	GL831399.1:627634-642500		37.6092	8.17597	7.58087	13.1315	20.7263	7.09079	3.64597	8.04989
ENSONIG00000000519	ENSONIG00000000519	fam175b	GL831135.1:1906478-1914718		5.11941	3.92413	2.10314	1.03405	16.1687	2.42192	5.28966	4.88355
ENSONIG00000000520	ENSONIG00000000520	ikbkg	GL831399.1:647500-661050		14.3724	11.2056	4.1822	9.60663	10.1876	6.32755	4.95799	17.0545
ENSONIG00000000521	ENSONIG00000000521	C6orf89	GL831191.1:2260003-2269030		18.5324	15.6832	9.116	15.0326	12.4473	5.89615	10.067	20.7712
ENSONIG00000000522	ENSONIG00000000522	mettl10	GL831135.1:1914826-1920705		5.62449	13.3936	2.54701	6.92023	25.9122	85.6113	24.0839	15.4486
ENSONIG00000000523	ENSONIG00000000523	nfs1	GL831191.1:2269179-2278701		34.7839	46.3438	11.6604	9.77888	34.9418	16.926	11.3913	45.2424
ENSONIG00000000524	ENSONIG00000000524	FAM53B (1 of 2)	GL831135.1:1935310-1947833		2.86874	7.7146	5.46723	0.925835	5.89413	2.38099	6.76839	9.06286
ENSONIG00000000525	ENSONIG00000000525	sps2	GL831399.1:662950-670437		23.293	45.4251	68.5077	22.8434	30.4886	4.56287	36.6356	58.3985
ENSONIG00000000526	ENSONIG00000000526	nkx1.2la	GL831135.1:1984129-1986184		0	0	0	0	0	0	0	0.216687
ENSONIG00000000527	ENSONIG00000000527	CHST15 (1 of 2)	GL831135.1:2010065-2016161		12.5898	51.3505	8.5212	5.94305	4.01985	1.16823	17.3946	14.692
ENSONIG00000000528	ENSONIG00000000528	GPR26 (1 of 2)	GL831135.1:2035635-2040251		3.28502	1.46191	0.396576	0	0.344209	0	0.365935	0.112398
ENSONIG00000000529	ENSONIG00000000529	ap4b1	GL831399.1:670569-698089		5.91838	4.54685	1.30236	1.40913	6.61721	4.59577	3.01494	4.02278
ENSONIG00000000530	ENSONIG00000000530	hmx2	GL831135.1:2132365-2135038		1.12047	0	0.0268446	0	1.35167	0	0	0.0244247
ENSONIG00000000531	ENSONIG00000000531	ABHD12B	GL831153.1:507600-539925		0.190535	0.348226	29.8058	10.1488	2.47209	6.96956	1.80255	2.16204
ENSONIG00000000532	ENSONIG00000000532	hmx3	GL831135.1:2139775-2143360		3.35447	0.208653	0.156083	0	0.328804	0	0	0
ENSONIG00000000533	ENSONIG00000000533	ikzf5	GL831135.1:2163204-2173882		0.861047	0.487307	0.0813729	0	0.996353	1.05713	0.25099	0.107287
ENSONIG00000000534	ENSONIG00000000534	pygl	GL831153.1:540508-552330		10.3626	20.0082	46.2266	69.0429	33.7005	21.6655	7.12148	1163.62
ENSONIG00000000535	ENSONIG00000000535	CUZD1	GL831135.1:2163204-2173882		6.41188	3.39688	1.6291	1.49556	19.1136	8.65396	2.59631	4.22554
ENSONIG00000000536	ENSONIG00000000536	itsn2a	GL831143.1:933084-972636		7.2349	0.933939	1.43449	14.1645	7.05822	1.61379	0.748164	0.157123
ENSONIG00000000537	ENSONIG00000000537	agt	GL831135.1:2181072-2183418		1.66688	0.516361	0.276812	751.853	17.7768	0.186265	0	0.163815
ENSONIG00000000538	ENSONIG00000000538	cpne1	GL831191.1:2279573-2307014		20.1434	26.7667	11.6156	6.01147	18.033	6.84027	6.39768	79.6154
ENSONIG00000000539	ENSONIG00000000539	zgc:101663	GL831399.1:739906-744258		0.910808	2.20233	1.27888	0.200743	7.19701	2.63184	2.57896	4.76243
ENSONIG00000000540	ENSONIG00000000540	fam58a	GL831399.1:755788-766408		15.3042	17.0239	5.68679	4.09693	16.3644	2.84179	7.27502	12.6824
ENSONIG00000000541	ENSONIG00000000541	cog2	GL831135.1:2185820-2194985		10.2139	6.60017	2.58394	5.64426	23.492	17.8116	5.1257	9.60109
ENSONIG00000000542	ENSONIG00000000542	srp19	GL831312.1:62001-64383		211.105	336.688	50.1394	161.609	677.991	99.3648	506.751	105.805
ENSONIG00000000543	ENSONIG00000000543	atp2b3b	GL831399.1:793363-848820		3.17916	0.14802	0.0685493	0	2.15459	0.0355969	0.0773999	0
ENSONIG00000000544	ENSONIG00000000544	rtdr1	GL831312.1:66762-69647		1.21061	0.521768	1.06304	0	37.6019	0.164077	0.556045	0.402848
ENSONIG00000000545	ENSONIG00000000545	pgbd5	GL831135.1:2196210-2223076		9.80478	0.720994	0.347986	0	2.04155	26.0951	1.67687	0.259804
ENSONIG00000000546	ENSONIG00000000546	DMTN (1 of 2)	GL831312.1:85995-103060		21.7846	17.2757	1.44074	0.123462	1.29817	0.164757	0.284034	2.69258
ENSONIG00000000547	ENSONIG00000000547	klf5a	GL831135.1:2246184-2252697		2.91033	0.644349	0.440818	0	1.82897	0.148818	5.92184	0.347702
ENSONIG00000000548	ENSONIG00000000548	-	GL831191.1:2307452-2338502		0.144975	0.117556	0.106338	0.114801	0.190558	0.0095533	0	0.0212072
ENSONIG00000000549	ENSONIG00000000549	trim9	GL831153.1:558155-599783		10.8908	0.325253	0.153144	0	1.22451	0.163618	0.323064	0.150162
ENSONIG00000000550	ENSONIG00000000550	pibf1	GL831135.1:2254578-2289621		1.31041	1.18132	0.475253	0.16705	17.5861	4.4664	1.97141	3.56923
ENSONIG00000000551	ENSONIG00000000551	-	GL831143.1:980826-986719		3.86611	6.91371	21.5006	39.422	5.22308	0.085446	3.08171	0.573621
ENSONIG00000000552	ENSONIG00000000552	-	GL831191.1:2342190-2362523		0.275362	0	0	0	0.379822	0.0166271	0	0.0761032
ENSONIG00000000553	ENSONIG00000000553	tmx1	GL831153.1:622512-627188		30.1525	30.2675	11.3574	12.6788	42.6421	16.6203	12.6832	67.0798
ENSONIG00000000554	ENSONIG00000000554	LPIN1 (1 of 2)	GL831143.1:993281-1000858		5.03479	2.79343	3.63985	1.01041	3.72707	0.304597	88.194	7.26483
ENSONIG00000000555	ENSONIG00000000555	dis3	GL831135.1:2254578-2289621		2.51214	4.67126	1.23267	1.31548	8.47843	4.49706	2.42553	9.92229
ENSONIG00000000556	ENSONIG00000000556	frmd6	GL831153.1:674308-701552		5.90971	5.29481	2.86246	5.58857	17.624	0.330153	9.64575	1.77366
ENSONIG00000000557	ENSONIG00000000557	si:dkey-220o5.5	GL831312.1:112496-117119		1.56595	0	0.494363	2.31467	0.153395	0.077602	0	0.314569
ENSONIG00000000558	ENSONIG00000000558	-	GL831312.1:125259-132370		32.1404	20.2083	7.07626	6.57545	30.7206	50.4227	21.5643	17.7411
ENSONIG00000000559	ENSONIG00000000559	gng2	GL831153.1:726521-728262		503.004	143.063	2.74832	0	24.6534	0	52.6215	26.6519
ENSONIG00000000560	ENSONIG00000000560	mak16	GL831312.1:132477-139203		18.0821	13.2254	7.46932	7.87061	18.7858	37.7221	16.9677	36.2336
ENSONIG00000000561	ENSONIG00000000561	DUSP23	GL831153.1:731183-731988		5.18374	1.86139	1.50575	0	15.2007	52.4886	11.7986	5.43118
ENSONIG00000000562	ENSONIG00000000562	SLC22A3	GL831153.1:748127-751520		0	0.317132	0.650606	0.931943	0	0	0	0.19363
ENSONIG00000000563	ENSONIG00000000563	bora	GL831135.1:2254578-2289621		0.333144	1.23985	0.311066	0.476359	9.57213	20.2491	2.88933	4.73111
ENSONIG00000000564	ENSONIG00000000564	txlnbb	GL831153.1:757566-761099		0.32559	549.023	0.0313696	1.5013	1.69113	0.0908283	1224.32	0.251773
ENSONIG00000000565	ENSONIG00000000565	st3gal2l	GL831191.1:2368924-2374943		0.485983	6.00508	0.643555	3.3948	8.00396	17.8347	9.92203	16.2925
ENSONIG00000000566	ENSONIG00000000566	-	GL831312.1:143224-154573		24.265	9.28549	1.89733	1.06211	54.727	5.33377	3.5895	9.20561
ENSONIG00000000567	ENSONIG00000000567	-	GL831153.1:766156-774009		8.09049	2.08182	0.0501952	0	0.786982	0.0420216	2.00036	0.0921519
ENSONIG00000000568	ENSONIG00000000568	-	GL831135.1:2302316-2324814		9.29532	2.00454	23.6643	0.18772	3.57265	15.0463	1.85102	0.141595
ENSONIG00000000569	ENSONIG00000000569	fuca2	GL831153.1:780197-785383		7.81612	24.2611	14.4656	25.1837	16.9305	10.1399	5.4813	45.2813
ENSONIG00000000570	ENSONIG00000000570	gpatch2	GL831143.1:1007635-1019153		4.89264	3.18646	1.41545	0.710999	33.7868	2.02415	5.93003	2.77612
ENSONIG00000000571	ENSONIG00000000571	-	GL831191.1:2412874-2421881		1.02009	7.50472	3.51483	1.8869	3.85223	0.835987	3.77971	23.4491
ENSONIG00000000572	ENSONIG00000000572	si:ch211-87m7.2	GL831312.1:161055-166777		10.0983	9.63113	4.31653	2.33481	15.0889	2.23536	4.59215	19.8881
ENSONIG00000000573	ENSONIG00000000573	esrrgb	GL831143.1:1033108-1055297		1.76189	32.3799	1.4925	0.508084	3.44113	0.0793083	0	0.259275
ENSONIG00000000574	ENSONIG00000000574	rem1	GL831191.1:2502810-2509141		0.242888	9.32133	0.910454	1.05114	15.4017	0.602331	0	0.269728
ENSONIG00000000575	ENSONIG00000000575	ADCK3 (1 of 2)	GL831153.1:791346-803953		4.72896	25.4854	6.41165	5.8748	20.3653	22.6471	6.15498	26.4311
ENSONIG00000000576	ENSONIG00000000576	ZAN	GL831474.1:2985-13182		0.0534043	0	0.0169807	0.70649	0.315546	0.0653711	0	0.0292824
ENSONIG00000000577	ENSONIG00000000577	pnp4a	GL831191.1:2527187-2536376		0	5.88478	0.25871	0	0.207822	0.112149	0	0.0779309
ENSONIG00000000578	ENSONIG00000000578	LRRC2	GL831312.1:170470-175641		0	27.0395	0.0831501	0.399685	3.00791	1.88779	450.386	0
ENSONIG00000000579	ENSONIG00000000579	UBAC2	GL831135.1:2327081-2335822		14.8866	6.40841	13.0587	9.34461	19.0599	8.58481	13.6574	15.3809
ENSONIG00000000580	ENSONIG00000000580	si:ch211-57i17.5	GL831143.1:1060277-1063689		0.484259	0	0	0	1.17631	0	0	0
ENSONIG00000000581	ENSONIG00000000581	FEZ2 (1 of 2)	GL831143.1:1068628-1078716		28.4259	9.57254	1.79228	2.16441	6.53032	1.88945	4.75262	7.62243
ENSONIG00000000582	ENSONIG00000000582	trib3	GL831191.1:2560489-2565537		1.86764	2.2888	1.54422	1.18774	3.50605	0.103609	1.51266	4.04933
ENSONIG00000000583	ENSONIG00000000583	ank3a	GL831135.1:2410998-2471320		5.44561	0.188501	0.18674	0.139661	0.770806	0.0878516	0.642161	1.29531
ENSONIG00000000584	ENSONIG00000000584	atrip	GL831191.1:2568063-2585215		0.934181	0.580554	0.37456	0.284848	8.23071	9.77488	1.13533	2.38031
ENSONIG00000000585	ENSONIG00000000585	nudt18	GL831312.1:235963-244068		3.76505	2.39962	1.85901	1.41906	1.4007	0.567906	2.11175	3.40955
ENSONIG00000000586	ENSONIG00000000586	-	GL831153.1:804911-808861		0.274903	0	0.330041	0.863951	1.19591	0	0	0.385529
ENSONIG00000000587	ENSONIG00000000587	C7orf43 (1 of 2)	GL831474.1:183698-201147		0.826475	0.80244	0.445707	0.198593	2.45734	0.403449	0.207798	5.03931
ENSONIG00000000588	ENSONIG00000000588	wdr26b	GL831143.1:1079086-1096034		12.5935	15.9715	5.80691	9.41625	47.1619	1.84975	9.0214	25.2626
ENSONIG00000000589	ENSONIG00000000589	ercc6l	GL831312.1:284730-288429		0.317195	0.570266	0.339569	0.176094	12.8304	11.1932	1.91201	9.07315
ENSONIG00000000590	ENSONIG00000000590	OGDH (1 of 2)	GL831312.1:324256-349304		26.8698	77.7347	18.3406	8.49268	30.2521	7.51099	33.4349	35.6216
ENSONIG00000000591	ENSONIG00000000591	-	GL831191.1:2657223-2658769		4.52037	0	0.0525515	0	0	0	0.64754	0
ENSONIG00000000592	ENSONIG00000000592	-	GL831191.1:2661635-2662225		0	0	0	0	0	0	0	0
ENSONIG00000000593	ENSONIG00000000593	GAL3ST4	GL831474.1:206193-209125		6.60422	4.70226	0.0669849	0.340823	2.29813	1.7808	0.399353	0.589168
ENSONIG00000000594	ENSONIG00000000594	pank4	GL831191.1:2664830-2683208		3.61023	4.95839	2.35463	2.51901	5.52135	2.95388	4.85445	12.2916
ENSONIG00000000595	ENSONIG00000000595	zgc:172079	GL831474.1:254464-260299		0.458968	0.533701	0.652928	0	0.0803374	0.0478931	0	19.9764
ENSONIG00000000596	ENSONIG00000000596	MBLAC1	GL831474.1:262231-265110		11.621	33.5436	7.44246	17.5142	34.1905	27.6682	22.9396	25.9066
ENSONIG00000000597	ENSONIG00000000597	-	GL831153.1:811939-815877		6.87136	11.0508	5.38148	19.7119	29.6013	58.3861	13.984	50.5928
ENSONIG00000000598	ENSONIG00000000598	mpdu1b	GL831474.1:271720-278960		29.8658	43.0609	24.5976	34.0687	21.5259	61.5232	10.7321	71.0961
ENSONIG00000000599	ENSONIG00000000599	adcy3b	GL831143.1:1096732-1110796		2.17101	2.01856	0.250284	0.260577	2.77774	0.147908	0.936637	2.03129
ENSONIG00000000600	ENSONIG00000000600	TP53I3	GL831153.1:818851-823993		0.358004	1.52685	4.5344	1.48828	3.31174	2.01869	0.328249	21.5935
ENSONIG00000000601	ENSONIG00000000601	cenpo	GL831153.1:825173-829352		2.3687	0.829598	1.06543	0.68098	21.2666	6.08592	0.742036	18.2703
ENSONIG00000000602	ENSONIG00000000602	SOX19	GL831474.1:281999-285857		15.086	0.445291	0.256997	0	0.703575	0.0322135	1.25348	0.17578
ENSONIG00000000603	ENSONIG00000000603	naga	GL831143.1:1116936-1125362		2.52203	12.7005	11.2058	13.9147	6.73438	10.1473	12.799	45.9732
ENSONIG00000000604	ENSONIG00000000604	slc5a6	GL831153.1:829586-841613		2.01707	5.81393	1.52907	8.27312	12.0261	9.25709	2.95945	8.05264
ENSONIG00000000605	ENSONIG00000000605	draxin	GL831191.1:2687019-2707534		13.9755	0.673459	0.0583064	0.153689	1.17612	0.15916	0.173942	0.249499
ENSONIG00000000606	ENSONIG00000000606	eif4a1b	GL831474.1:291037-296456		53.0014	142.362	46.9852	198.394	50.1773	291.975	145.769	281.953
ENSONIG00000000607	ENSONIG00000000607	ccdc6b	GL831135.1:2479669-2500884		21.7269	15.8273	7.09927	5.54359	32.7546	21.1938	123.143	17.7322
ENSONIG00000000608	ENSONIG00000000608	agtrap	GL831191.1:2714422-2728395		1.17219	7.32645	5.26546	9.96106	3.32331	12.8835	3.75091	28.8743
ENSONIG00000000609	ENSONIG00000000609	mrps18a	GL831143.1:1254879-1264268		22.6443	46.4838	9.13863	13.1583	82.8784	76.9962	13.1183	59.916
ENSONIG00000000610	ENSONIG00000000610	slc16a9a	GL831135.1:2502138-2508405		11.0298	7.57906	139.238	0.448617	10.5738	0.453062	4.25611	5.28007
ENSONIG00000000611	ENSONIG00000000611	rsph9	GL831143.1:1254879-1264268		2.27927	4.39532	2.68832	2.37063	17.8929	4.66009	1.86592	5.54714
ENSONIG00000000612	ENSONIG00000000612	RNF207	GL831191.1:2732787-2763500		0.16666	13.1316	0.0477913	0.183058	5.22994	0.0120232	0	0.171488
ENSONIG00000000613	ENSONIG00000000613	FAM13C	GL831135.1:2508575-2540893		3.02954	0.275406	0.216168	0.0859437	19.2805	0.0817096	19.9938	0.201937
ENSONIG00000000614	ENSONIG00000000614	tmem63a	GL831143.1:1279679-1293847		1.69091	12.127	4.16393	10.311	13.2012	1.59563	8.81461	21.9126
ENSONIG00000000615	ENSONIG00000000615	rpl22	GL831191.1:2732787-2763500		440.734	2115.45	483.544	2260.66	615.573	118.995	1065.02	1453.29
ENSONIG00000000616	ENSONIG00000000616	ZMIZ2 (1 of 2)	GL831312.1:352502-367033		19.8021	16.3719	5.77812	5.3086	10.3996	6.63242	14.6295	8.84098
ENSONIG00000000617	ENSONIG00000000617	lrch4	GL831474.1:316538-347910		5.65138	8.10256	4.94882	3.42456	11.0126	7.47497	9.59439	68.5178
ENSONIG00000000618	ENSONIG00000000618	PHYHIPL (1 of 2)	GL831135.1:2508575-2540893		45.5472	5.83554	1.23111	0.304376	5.42774	0.688269	37.7581	35.9365
ENSONIG00000000619	ENSONIG00000000619	CHD5	GL831191.1:2770983-2801369		23.0837	0.438873	0.032155	0.0331795	1.55208	0.275385	0.365028	0.0604623
ENSONIG00000000620	ENSONIG00000000620	bicc1a	GL831135.1:2547505-2605318		1.82607	5.06735	1.24696	0.185287	18.909	3.69129	4.2374	0.542299
ENSONIG00000000621	ENSONIG00000000621	gprc6a (1 of 2)	GL831143.1:1298283-1304983		0	0	0	0	0	0	0	0
ENSONIG00000000622	ENSONIG00000000622	H2AFZ	GL831474.1:360345-362334		164.229	86.5466	35.3368	38.2642	222.721	626.305	99.8801	161.924
ENSONIG00000000623	ENSONIG00000000623	gprc6a (2 of 2)	GL831143.1:1321972-1328929		0	0	0	0	0.207206	0.0410318	0.169347	0
ENSONIG00000000624	ENSONIG00000000624	GPR113	GL831153.1:847589-853134		0	0	0.141351	0	0.120023	0	0	0
ENSONIG00000000625	ENSONIG00000000625	smc6	GL831153.1:880716-895989		0.44738	0.649513	0.156392	0.14585	2.96	1.01513	0.26288	1.5954
ENSONIG00000000626	ENSONIG00000000626	ube2d1a	GL831135.1:2606464-2611710		7.48661	11.7093	4.04396	3.26291	37.2777	52.2241	3.71618	42.2605
ENSONIG00000000627	ENSONIG00000000627	ARHGEF10L (1 of 2)	GL831191.1:2803179-2915897		17.2374	3.79961	0.746503	4.12545	7.50576	0.260527	1.93764	0.474806
ENSONIG00000000628	ENSONIG00000000628	FAXC (2 of 2)	GL831143.1:1375767-1386672		37.9135	2.75206	0.0639656	0	1.9612	0.0153552	0.587019	0.829015
ENSONIG00000000629	ENSONIG00000000629	ppiaa	GL831312.1:370802-373846		545.123	1174.66	412.238	657.958	327.058	489.978	727.306	1781.83
ENSONIG00000000630	ENSONIG00000000630	rgs7	GL831135.1:2641145-2665895		42.8155	0.650659	0.112176	0	2.65799	0	0	0
ENSONIG00000000631	ENSONIG00000000631	ccnc	GL831143.1:1387905-1408295		17.2057	11.0909	5.75868	6.55987	18.3855	45.7434	20.7015	25.5378
ENSONIG00000000632	ENSONIG00000000632	SLC18A1	GL831312.1:394768-405537		1.89839	0.724958	2.65806	0	2.74636	0.394487	0	0.618051
ENSONIG00000000633	ENSONIG00000000633	VSNL1 (1 of 2)	GL831153.1:901555-908274		608.855	9.92501	0.293733	0.530442	0.630573	0	0.308465	0.0351185
ENSONIG00000000634	ENSONIG00000000634	SCML4 (2 of 2)	GL831153.1:909276-915431		24.9484	1.06255	0.109634	0	5.47929	0.0229885	0.328427	0.871242
ENSONIG00000000635	ENSONIG00000000635	ngs	GL831143.1:1387905-1408295		0.842029	0.558059	0.071868	0.574018	2.65041	0.147746	0	0.163405
ENSONIG00000000636	ENSONIG00000000636	lace1a	GL831153.1:916550-928558		2.13911	2.68084	1.15262	0.204296	10.9069	7.82922	2.57123	4.89869
ENSONIG00000000637	ENSONIG00000000637	igsf21a	GL831191.1:3048901-3218819		36.199	1.00211	0	0	1.79172	0.206004	2.99797	0
ENSONIG00000000638	ENSONIG00000000638	foxo3a	GL831153.1:933294-939885		4.9072	0	0.209894	0	1.88967	3.24498	0.809458	2.16462
ENSONIG00000000639	ENSONIG00000000639	-	GL831153.1:944878-952928		0.534739	0	1.94315	0	0.506647	0	0	0.0250959
ENSONIG00000000640	ENSONIG00000000640	aadacl4	GL831191.1:3228910-3240684		0.484321	0.217528	0.0379555	0	0.65197	1.58032	0.227992	0
ENSONIG00000000641	ENSONIG00000000641	tti2	GL831312.1:422004-426020		4.6507	8.02378	2.12981	4.11702	13.2488	17.8274	1.70247	9.05091
ENSONIG00000000642	ENSONIG00000000642	dhrs3b	GL831191.1:3228910-3240684		7.47053	13.2007	2.1563	0.873951	10.4931	42.634	6.88452	1.21751
ENSONIG00000000643	ENSONIG00000000643	si:ch73-242m19.1	GL831153.1:954505-973362		5.54757	0.241106	16.8866	0	2.05787	0.434449	0.6734	0.174038
ENSONIG00000000644	ENSONIG00000000644	pgm3	GL831143.1:1408832-1414622		3.41275	2.08242	3.78672	2.36636	7.35566	8.28634	2.81673	12.8879
ENSONIG00000000645	ENSONIG00000000645	c5	GL831312.1:430097-458077		0.0863673	0.34255	0.241952	834.92	10.4784	0.488442	0.342489	0.0443492
ENSONIG00000000646	ENSONIG00000000646	zbtb24	GL831153.1:954505-973362		2.94113	1.55042	2.30579	0.446939	8.56009	0.576315	0.867868	2.50458
ENSONIG00000000647	ENSONIG00000000647	LRRC38	GL831191.1:3271565-3284303		2.88467	0.562031	0	0	0	0	1.15835	0.0877426
ENSONIG00000000648	ENSONIG00000000648	ephb2b	GL831191.1:3317731-3435943		0.483588	0	0.114316	0	2.67376	0.506384	0.21673	0.0145599
ENSONIG00000000649	ENSONIG00000000649	DDO	GL831153.1:977191-982475		1.56581	0.535577	1.46065	0.0665966	5.32395	1.94737	0.241072	7.86505
ENSONIG00000000650	ENSONIG00000000650	GREM2	GL831135.1:2672952-2673531		0	0	0	0	3.48088	0	0	1.85147
ENSONIG00000000651	ENSONIG00000000651	-	GL831135.1:2691174-2711775		0.794282	0.0828602	0.0280356	0	0.120129	1.06064	0.632351	0
ENSONIG00000000652	ENSONIG00000000652	SAMD5	GL831153.1:987339-1034981		2.20238	0.319627	0.654513	0	8.66625	4.18046	1.36875	1.22824
ENSONIG00000000653	ENSONIG00000000653	-	GL831135.1:2818155-2905802		0.0690681	46.4184	0.00324106	0	3.06464	0.728589	0.0570883	0
ENSONIG00000000654	ENSONIG00000000654	stxbp5b	GL831153.1:1035218-1065834		14.7979	12.8901	2.41895	1.92337	5.41479	1.46091	3.81066	9.87234
ENSONIG00000000655	ENSONIG00000000655	-	GL831143.1:1417608-1443264		77.1714	7.82232	0.0375892	1.3527	1.33674	0.021087	0	0.0655676
ENSONIG00000000656	ENSONIG00000000656	-	GL831143.1:1466933-1469139		0.98537	0	0.104673	0	2.91575	0.330583	0	0
ENSONIG00000000657	ENSONIG00000000657	-	GL831143.1:1478691-1480683		0	0	0	0	0	0	0	0.143494
ENSONIG00000000658	ENSONIG00000000658	-	GL831143.1:1498349-1501071		0.308098	0	0	0	0	0	0	1.12508
ENSONIG00000000659	ENSONIG00000000659	-	GL831143.1:1537764-1538740		0	0	0	0	0	0	0	0
ENSONIG00000000660	ENSONIG00000000660	-	GL831143.1:1551549-1552788		0	0	0	0	0	0	0	0
ENSONIG00000000661	ENSONIG00000000661	PRSS35 (1 of 2)	GL831143.1:1555241-1556939		0	0.54058	0.0477262	0	0.115005	0	0	0.0365963
ENSONIG00000000662	ENSONIG00000000662	-	GL831143.1:1558264-1559747		0	0	0	0	0	0	0	0
ENSONIG00000000663	ENSONIG00000000663	fam46a	GL831143.1:1583691-1589809		3.12461	9.41705	3.21478	0.926256	3.84554	0.291615	1.36609	41.5796
ENSONIG00000000664	ENSONIG00000000664	PRDM12 (1 of 2)	GL831312.1:493995-499973		1.14991	0	0	1.13008	0.215767	0	0	0
ENSONIG00000000665	ENSONIG00000000665	elovl4b	GL831143.1:1632193-1645331		3.8777	63.0361	0.510936	0	3.54149	0.0600993	0.243685	0.44681
ENSONIG00000000666	ENSONIG00000000666	FUBP3 (1 of 2)	GL831312.1:509652-525612		7.88198	13.423	5.64034	9.40227	17.6043	2.1519	25.2194	8.72199
ENSONIG00000000667	ENSONIG00000000667	soga3b	GL831143.1:1646636-1653969		31.7019	1.02737	0	0	2.76525	0.0179322	0.331358	0.0110922
ENSONIG00000000668	ENSONIG00000000668	rab32b	GL831153.1:1070225-1072137		0.142938	0	0.232401	0	0	0	0	0
ENSONIG00000000669	ENSONIG00000000669	GRM1 (1 of 2)	GL831153.1:1074090-1099836		17.7332	0.186009	0.0225634	0	0.143736	0.0153172	0.0649634	0
ENSONIG00000000670	ENSONIG00000000670	-	GL831143.1:1678599-1681372		2.90501	3.84694	1.64378	1.16631	20.0681	47.2709	7.06937	24.5639
ENSONIG00000000671	ENSONIG00000000671	hddc2	GL831143.1:1692244-1693696		6.54981	5.99957	3.31865	1.57746	12.5949	5.23659	7.22827	8.76852
ENSONIG00000000672	ENSONIG00000000672	tpd52l1	GL831143.1:1696471-1703629		3.0595	9.97202	4.64232	4.05796	2.59332	2.84317	0.801237	6.66879
ENSONIG00000000673	ENSONIG00000000673	rnf217	GL831143.1:1710913-1729736		3.92431	6.65491	3.12568	1.82047	5.1546	0.0659304	2.33202	3.83893
ENSONIG00000000674	ENSONIG00000000674	nkain2	GL831143.1:1730776-1839426		20.9214	3.94572	0.169332	8.13013	7.83561	0.137309	0.140702	0.214573
ENSONIG00000000675	ENSONIG00000000675	lactbl1b	GL831191.1:3475487-3496871		0.678395	4.56725	0.241883	0.138921	0.0622929	0.0343679	0	0
ENSONIG00000000676	ENSONIG00000000676	-	GL831191.1:3498556-3506536		1.43539	0.530687	0	0	0.805453	0.227299	0	0
ENSONIG00000000677	ENSONIG00000000677	surf4l	GL831312.1:556535-561788		4.84495	11.9242	5.09132	23.7223	12.4036	16.7421	12.8668	50.7332
ENSONIG00000000678	ENSONIG00000000678	TRDN (1 of 2)	GL831143.1:1863497-1888567		0.211844	28.8432	0	0	0.169702	0.199143	46.578	0.165423
ENSONIG00000000679	ENSONIG00000000679	GUCA2A	GL831191.1:3535675-3537457		1.09012	0.342421	221.509	2.73121	2.94891	0.521187	2.06546	0.300853
ENSONIG00000000680	ENSONIG00000000680	akap7	GL831143.1:1953364-1997365		27.4693	14.7996	6.15043	4.349	23.9827	0.83861	17.4634	5.37318
ENSONIG00000000681	ENSONIG00000000681	-	GL831191.1:3538980-3568355		0.093133	0.0920196	2.5119	5.78399	0.229079	0.0308138	0.116878	0.0602933
ENSONIG00000000682	ENSONIG00000000682	alpl	GL831191.1:3589285-3627228		10.5234	42.2271	51.3809	10.0028	8.49565	1.74546	0	4.00396
ENSONIG00000000683	ENSONIG00000000683	med23	GL831143.1:2016371-2035543		8.25204	7.79479	3.12621	2.86083	20.7118	6.29362	4.79433	16.6433
ENSONIG00000000684	ENSONIG00000000684	shprh	GL831153.1:1101679-1116008		6.20293	1.99948	0.760357	0.95723	6.58861	0.650546	1.0284	4.72645
ENSONIG00000000685	ENSONIG00000000685	si:dkeyp-110a12.4	GL831153.1:1120303-1123049		0	0	0.110475	0	0	0	0.729342	0
ENSONIG00000000686	ENSONIG00000000686	kazald3	GL831312.1:569055-571529		4.81509	0.850484	0	2.68361	1.8019	9.14352	3.16588	0.117645
ENSONIG00000000687	ENSONIG00000000687	fbxo30a	GL831153.1:1124279-1127702		0.507928	0.503903	0.266106	0.297347	5.59096	0.0376431	1.41773	2.58919
ENSONIG00000000688	ENSONIG00000000688	akap12a	GL831153.1:1153219-1157927		0	1.16222	0.0164909	0	0	0	0	0.106371
ENSONIG00000000689	ENSONIG00000000689	GRIN1 (1 of 2)	GL831312.1:582905-659712		7.9938	0.970095	0	0	0.957711	0.0386325	0	0.0355948
ENSONIG00000000690	ENSONIG00000000690	rmnd1	GL831153.1:1164619-1169277		4.7012	4.33501	1.64334	1.7996	7.47241	9.44054	1.14326	9.10335
ENSONIG00000000691	ENSONIG00000000691	crfb8	GL831143.1:2036895-2042045		0.127737	0	6.02198	0.590928	2.18159	8.47804	1.43834	0
ENSONIG00000000692	ENSONIG00000000692	syne1b	GL831153.1:1173339-1247040		4.73249	2.8112	0.751623	0.0893949	1.09445	0.181843	0.199566	10.6658
ENSONIG00000000693	ENSONIG00000000693	ehd3	GL831143.1:2047759-2065655		33.173	5.34751	167.964	36.7798	6.56631	0.963392	11.5948	2.94769
ENSONIG00000000694	ENSONIG00000000694	ece1	GL831191.1:3629258-3655949		2.75338	47.6654	18.2359	12.6707	9.78885	12.3201	7.31199	31.8514
ENSONIG00000000695	ENSONIG00000000695	C1orf95	GL831143.1:2104953-2122680		76.4181	0.440938	0.243125	0.454593	2.08849	0.134491	5.0758	0
ENSONIG00000000696	ENSONIG00000000696	adck3	GL831143.1:2131648-2152780		10.913	43.8418	11.5519	11.3045	21.346	9.79594	25.8238	33.7529
ENSONIG00000000697	ENSONIG00000000697	EIF4G3	GL831191.1:3676327-3746935		9.81373	5.05323	1.77888	0.831568	21.5846	0.803332	3.46519	4.74764
ENSONIG00000000698	ENSONIG00000000698	itpkb	GL831143.1:2156937-2176395		2.98245	4.32243	1.09608	0	4.13389	0.0735546	0.321825	7.06205
ENSONIG00000000699	ENSONIG00000000699	EPB41L2	GL831143.1:2194820-2244437		4.85707	1.65917	0.360228	0.674383	10.6985	0.276322	1.36728	5.14038
ENSONIG00000000700	ENSONIG00000000700	dok2	GL831312.1:676330-734857		7.97332	5.38936	3.83795	4.38126	0.728086	0.52242	1.61095	28.1168
ENSONIG00000000701	ENSONIG00000000701	tsc1a	GL831312.1:676330-734857		3.23011	6.63406	1.65356	2.60528	5.93824	4.16583	39.9069	3.43559
ENSONIG00000000702	ENSONIG00000000702	MYCT1 (1 of 2)	GL831153.1:1250159-1251577		3.74314	101.214	3.10346	1.96687	5.25309	0.522658	5.66714	6.30202
ENSONIG00000000703	ENSONIG00000000703	tulp4b	GL831153.1:1255187-1264559		20.6708	3.81881	0.118151	0.0503985	1.45397	0.0111769	0.557914	0.441358
ENSONIG00000000704	ENSONIG00000000704	ak8	GL831312.1:676330-734857		3.38891	1.10971	1.97597	0.812098	26.0742	1.69701	0.688297	0.274904
ENSONIG00000000705	ENSONIG00000000705	hp1bp3	GL831191.1:3750788-3756902		22.0964	10.3129	3.51842	2.94887	23.0999	1.85403	5.35631	20.0104
ENSONIG00000000706	ENSONIG00000000706	dcaf7 (1 of 2)	GL831149.1:6922-40811		27.9719	72.6829	4.91476	4.7646	28.4011	17.2781	12.0703	15.4946
ENSONIG00000000707	ENSONIG00000000707	slc18b1	GL831153.1:1268309-1274868		6.4169	10.759	2.20835	4.74774	12.5479	0.51206	0.973321	8.18461
ENSONIG00000000708	ENSONIG00000000708	tmem200a	GL831143.1:2292733-2298923		9.98879	0.977655	0.352421	0.0712512	0.676038	0.0399963	1.00462	0.283778
ENSONIG00000000709	ENSONIG00000000709	kif17	GL831191.1:3766504-3795383		0.522699	0.193359	0.89002	0.0937184	2.52978	0.19917	0.106781	0
ENSONIG00000000710	ENSONIG00000000710	kcnh6	GL831149.1:6922-40811		1.33305	48.5502	0.105915	0	0.677338	0.0701065	0	0.0216293
ENSONIG00000000711	ENSONIG00000000711	ddx31	GL831312.1:738721-750020		23.398	19.5419	7.34092	17.6553	36.7806	23.1953	9.85101	13.2846
ENSONIG00000000712	ENSONIG00000000712	ahi1	GL831153.1:1284007-1294840		2.72408	3.92236	2.75132	0.774361	15.6281	1.33738	0.871354	2.36483
ENSONIG00000000713	ENSONIG00000000713	tmem244	GL831143.1:2318975-2326725		4.16237	11.0196	0.219473	0	0	0.356733	0	0
ENSONIG00000000714	ENSONIG00000000714	fkbp6	GL831143.1:2327760-2333596		0.92755	0.807029	0.55218	0.408427	116.347	65.0856	5.41653	0
ENSONIG00000000715	ENSONIG00000000715	actn2	GL831135.1:2913440-2932371		0.599835	3099.28	0.182367	0.799241	9.38489	0.192977	0.975725	0.21225
ENSONIG00000000716	ENSONIG00000000716	C1orf116 (1 of 2)	GL831191.1:3799738-3801508		0.117909	2.82555	1.31905	0.589455	0.727213	1.79061	0.941169	0.068112
ENSONIG00000000717	ENSONIG00000000717	ARHGAP18	GL831143.1:2335058-2355306		13.6106	5.36689	46.3061	13.9382	8.85975	2.99084	21.2606	7.99779
ENSONIG00000000718	ENSONIG00000000718	si:dkey-226m8.7 (1 of 5)	GL832635.1:3745-5118		0.273152	4.50606	1.40893	0	3.74367	0.893812	0	129.984
ENSONIG00000000719	ENSONIG00000000719	MAP7 (2 of 2)	GL831153.1:1302554-1310839		20.6251	0.554746	0.104415	0	0.930886	1.72412	0.340928	0.0503066
ENSONIG00000000720	ENSONIG00000000720	-	GL831312.1:751301-757550		0.911195	0	0	0	0.811115	0.240926	0	0.0677298
ENSONIG00000000721	ENSONIG00000000721	OTOF (1 of 2)	GL831153.1:1317302-1335342		0.026123	0.0447424	0.0760761	0	3.71471	0	0.0492145	0.325236
ENSONIG00000000722	ENSONIG00000000722	sel1l	GL831143.1:2357773-2369003		7.18175	9.54935	4.93931	5.70231	12.7018	2.91637	9.7446	16.5487
ENSONIG00000000723	ENSONIG00000000723	QSOX2	GL831312.1:799823-807286		8.27859	4.27792	1.7501	1.04891	5.04709	9.4191	2.64028	7.4705
ENSONIG00000000724	ENSONIG00000000724	gfap	GL831149.1:45318-52126		418.705	22.3006	0.099615	0.176378	0.0801942	0.0708392	0.196471	0.0814772
ENSONIG00000000725	ENSONIG00000000725	chga	GL831143.1:2387035-2394427		187.759	0.679297	0.0893552	0	5.18686	0.0383049	0.478416	0.169912
ENSONIG00000000726	ENSONIG00000000726	PAK2 (1 of 2)	GL831153.1:1338788-1346340		6.84144	14.7007	7.9184	2.3947	15.5949	8.6166	9.636	101.354
ENSONIG00000000727	ENSONIG00000000727	NACC2 (1 of 2)	GL831312.1:821510-830806		7.14046	4.08731	0.0595611	0.144438	0.238851	0.10962	6.33123	0.0827009
ENSONIG00000000728	ENSONIG00000000728	map3k3	GL831149.1:57654-79781		2.55846	12.9687	7.34525	1.75207	3.27334	0.415358	2.74007	18.303
ENSONIG00000000729	ENSONIG00000000729	ctgfa	GL831143.1:2396001-2398078		7.38858	112.922	36.917	2.56142	8.94227	1.21203	4.45703	22.5055
ENSONIG00000000730	ENSONIG00000000730	cables2b	GL831387.1:49708-98780		1.86456	3.41871	0.530094	0	1.72657	0.395179	0.466435	3.16217
ENSONIG00000000731	ENSONIG00000000731	brd3a (1 of 2)	GL831312.1:842212-855196		23.4402	16.9728	6.53408	6.16624	18.2522	3.41313	7.829	13.2178
ENSONIG00000000732	ENSONIG00000000732	ccm2l	GL831387.1:103431-115739		3.3498	13.524	1.51595	1.12262	1.13758	0.0759485	1.76685	2.70259
ENSONIG00000000733	ENSONIG00000000733	stx7l	GL831143.1:2432634-2439487		4.58205	22.7123	12.788	29.2394	19.6402	17.2121	5.12079	61.0491
ENSONIG00000000734	ENSONIG00000000734	ddx42	GL831149.1:96825-106061		37.4705	22.0796	12.1447	11.1536	31.1174	7.67874	22.4787	28.0623
ENSONIG00000000735	ENSONIG00000000735	xkr7	GL831387.1:127966-139422		4.49046	0	0	0	0.772987	0.204537	0	0
ENSONIG00000000736	ENSONIG00000000736	cdk16	GL831387.1:265827-281624		42.2139	10.509	1.40125	1.65069	8.92754	32.9171	23.04	0.52364
ENSONIG00000000737	ENSONIG00000000737	p4ha1b	GL831135.1:2932400-2945419		1.81691	6.02515	6.31381	0.207689	10.6472	0.802273	2.16513	3.75588
ENSONIG00000000738	ENSONIG00000000738	strada	GL831149.1:106285-123112		10.648	6.11464	1.47262	2.66519	13.3557	31.4454	5.69378	2.53847
ENSONIG00000000739	ENSONIG00000000739	C6orf58	GL831143.1:2443082-2446262		0.137851	1.47495	0.360669	5034.36	5.79206	2.10709	0.546547	0.0630076
ENSONIG00000000740	ENSONIG00000000740	hltf	GL831153.1:1354292-1368837		4.87771	2.53325	1.1833	2.59342	21.4223	11.3102	2.49853	8.43086
ENSONIG00000000741	ENSONIG00000000741	rnf113a	GL831149.1:106285-123112		11.5521	11.5882	5.72738	4.63137	20.8773	24.8899	6.06646	23.6772
ENSONIG00000000742	ENSONIG00000000742	dpf3	GL831143.1:2449623-2462750		1.38725	0	0.0805059	0	2.14448	0.105998	0	0
ENSONIG00000000743	ENSONIG00000000743	ecd	GL831135.1:2956098-2961064		5.75691	5.10503	2.22769	1.913	13.6821	10.7946	2.35434	9.25746
ENSONIG00000000744	ENSONIG00000000744	PPAPDC3 (1 of 2)	GL831312.1:859171-863614		0.257286	9.10375	0	0	0.671993	1.31737	161.905	0.186054
ENSONIG00000000745	ENSONIG00000000745	zgc:66350	GL831312.1:880050-883537		10.4828	19.4326	13.7932	49.3712	30.9556	13.6844	25.6268	2.9037
ENSONIG00000000746	ENSONIG00000000746	wdr21	GL831143.1:2472114-2476373		10.6368	13.3201	3.08566	5.68445	28.8363	10.2283	13.9113	21.9004
ENSONIG00000000747	ENSONIG00000000747	chek2	GL831312.1:883968-889780		6.13404	5.87909	2.41091	5.966	10.588	52.6438	7.02487	17.1205
ENSONIG00000000748	ENSONIG00000000748	RUNDC3A (1 of 2)	GL831149.1:124006-137895		97.3095	2.13017	0.100694	0.12894	4.8769	0.277909	0.144293	0.977548
ENSONIG00000000749	ENSONIG00000000749	gyg1a	GL831153.1:1371705-1380170		17.4819	64.4763	13.7019	5.03528	19.569	2.04292	4.87194	127.318
ENSONIG00000000750	ENSONIG00000000750	abt1	GL831387.1:284589-287543		5.1097	6.10135	1.64076	1.48584	22.0613	11.5756	5.22746	8.66536
ENSONIG00000000751	ENSONIG00000000751	fam149b1	GL831135.1:2962164-2972194		4.20779	1.87108	0.61977	0.157331	9.72106	4.11258	0.914136	0.831544
ENSONIG00000000752	ENSONIG00000000752	pls1	GL831153.1:1385528-1421268		0.917021	0.449912	43.1017	0.234924	0.853486	0.0973526	0	0.12455
ENSONIG00000000753	ENSONIG00000000753	rad51c	GL831387.1:288341-292511		1.04993	1.64705	0.304553	0.478251	13.9933	20.8834	4.20937	3.02437
ENSONIG00000000754	ENSONIG00000000754	ZFYVE1 (1 of 2)	GL831143.1:2477941-2482196		5.50517	4.20763	1.96704	4.47372	4.38982	2.0198	10.9917	2.31399
ENSONIG00000000755	ENSONIG00000000755	grm6a	GL831387.1:296697-316577		0.0693862	0	0	0	0.755554	0.0750816	0	0
ENSONIG00000000756	ENSONIG00000000756	dnajc9	GL831135.1:2972815-2978422		32.9514	18.299	7.07062	5.66758	85.3628	72.2809	13.7196	38.443
ENSONIG00000000757	ENSONIG00000000757	FAM117A (1 of 2)	GL831149.1:139270-147351		0	2.49376	0.550525	0	6.39054	1.18893	26.6186	9.49011
ENSONIG00000000758	ENSONIG00000000758	slc35b1	GL831149.1:149314-154790		18.0088	4.41472	4.5872	13.8232	14.4935	17.7355	20.3248	25.2395
ENSONIG00000000759	ENSONIG00000000759	pigh	GL831143.1:2483705-2487239		10.6711	2.65548	1.65638	1.20174	9.01071	9.91119	12.5187	3.76799
ENSONIG00000000760	ENSONIG00000000760	si:ch73-34j14.3	GL831135.1:2981973-2992715		9.50162	0.760939	0.0589607	0.100471	0.438773	0	0	0.156442
ENSONIG00000000761	ENSONIG00000000761	CCSER2	GL831135.1:3033355-3071504		0.374861	3.09929	0.14018	0.249954	21.0581	1.39588	1.51461	1.31256
ENSONIG00000000762	ENSONIG00000000762	rhov	GL831143.1:2506042-2508934		10.556	1.41995	0.631268	8.91659	5.20349	4.84028	17.1679	7.15923
ENSONIG00000000763	ENSONIG00000000763	tsr2	GL831387.1:332565-337515		13.6547	14.7801	4.48912	8.89285	17.7453	39.5759	31.4491	26.0574
ENSONIG00000000764	ENSONIG00000000764	vps18	GL831143.1:2509645-2515789		16.7165	8.44763	3.35107	2.58028	18.0711	14.0083	12.3269	14.1036
ENSONIG00000000765	ENSONIG00000000765	olfm1a	GL831312.1:957117-974597		57.4684	0.264791	0.23242	0	0.118693	0	0	0.135319
ENSONIG00000000766	ENSONIG00000000766	ndufa4	GL831149.1:158751-161790		246.505	1640.41	263.135	276.901	219.823	222.445	516.554	740.631
ENSONIG00000000767	ENSONIG00000000767	-	GL831149.1:201528-295637		3.0034	1.86453	0.336773	0	6.08935	7.17268	1.69616	3.34172
ENSONIG00000000768	ENSONIG00000000768	grid1a	GL831135.1:3165581-3424215		11.2878	0.243256	0	0	2.56531	3.18322	0.450672	0.0122686
ENSONIG00000000769	ENSONIG00000000769	srpk3	GL831387.1:340846-348405		3.51171	4.2238	0.160935	0.5899	3.82511	2.57725	29.8221	1.19652
ENSONIG00000000770	ENSONIG00000000770	atr	GL831153.1:1421992-1440513		0.905823	1.27549	0.599822	0.281978	10.632	3.31707	0.656277	4.54821
ENSONIG00000000771	ENSONIG00000000771	fnbp1	GL831312.1:1021495-1101393		22.3068	0.512144	0.0796093	0.0702856	0.859416	0.206734	0	0.0405678
ENSONIG00000000772	ENSONIG00000000772	ino80	GL831143.1:2516056-2557258		5.63419	4.48547	1.8765	1.65703	15.2959	1.06041	1.79928	7.99835
ENSONIG00000000773	ENSONIG00000000773	NXPH3 (1 of 2)	GL831149.1:360392-378176		7.34563	0.184864	0.0458687	0	2.36205	0	0	0.187996
ENSONIG00000000774	ENSONIG00000000774	-	GL831153.1:1477274-1481768		12.0205	7.20775	0.233439	1.25787	13.2118	0.912225	0.502648	0.0698357
ENSONIG00000000775	ENSONIG00000000775	NGFR (1 of 2)	GL831149.1:453229-479127		28.6034	3.44239	1.62242	8.96307	11.0124	0.401296	1.10433	3.52917
ENSONIG00000000776	ENSONIG00000000776	-	GL831149.1:508024-514593		0	0	0.173152	0	0	0	0.541836	0.452216
ENSONIG00000000777	ENSONIG00000000777	wapala	GL831135.1:3507559-3524769		5.96073	6.27311	2.86296	0.900079	13.408	1.83194	2.32462	7.61207
ENSONIG00000000778	ENSONIG00000000778	slc4a1a	GL831149.1:522606-530973		10.9539	80.5257	17.0657	2.8563	2.28904	0.157446	3.00729	642.817
ENSONIG00000000779	ENSONIG00000000779	slc35g2a	GL831153.1:1492217-1493549		63.8394	4.42607	0	0.624494	0.836424	0.23223	0	0.0794711
ENSONIG00000000780	ENSONIG00000000780	stag1a	GL831153.1:1504526-1543194		9.36651	5.24632	2.38672	0.938102	24.2513	2.12245	6.68965	9.61338
ENSONIG00000000781	ENSONIG00000000781	chac1	GL831143.1:2558928-2560388		223.425	269.663	29.4998	108.226	88.6873	266.421	1554.94	102.025
ENSONIG00000000782	ENSONIG00000000782	dll4 (1 of 2)	GL831143.1:2567728-2575721		9.40193	43.7288	2.19894	2.12665	5.03929	0.990475	4.49441	3.23979
ENSONIG00000000783	ENSONIG00000000783	plxna1	GL831387.1:356212-414470		7.82307	7.40016	1.33501	4.55499	4.4099	1.00883	7.13954	1.08477
ENSONIG00000000784	ENSONIG00000000784	htra1a (1 of 2)	GL831135.1:3526278-3558423		3.87015	8.15375	0.101129	0.0892562	1.08086	0.0753137	21.4954	4.51507
ENSONIG00000000785	ENSONIG00000000785	med27	GL831312.1:1116932-1124005		46.5741	50.4896	12.6868	37.7552	64.915	57.4295	34.1153	37.2906
ENSONIG00000000786	ENSONIG00000000786	syndig1l	GL831143.1:2776568-2818791		27.5527	0.601151	0.0730773	0.0670136	0.904228	0.0383506	0.0777071	0.051217
ENSONIG00000000787	ENSONIG00000000787	vrtn	GL831143.1:2864853-2872847		0.049358	0	0	0	2.08122	0.542211	0.163579	0
ENSONIG00000000788	ENSONIG00000000788	SLC25A29 (1 of 3)	GL831143.1:2887059-2895031		2.7055	0.32897	0.598528	0	6.54628	1.30483	0.382444	0.81691
ENSONIG00000000789	ENSONIG00000000789	ntng2a	GL831312.1:1129454-1145958		0	0.201474	0	0	0.0832949	0	0	0
ENSONIG00000000790	ENSONIG00000000790	plekha1	GL831135.1:3562883-3575100		22.8763	13.7932	3.30386	3.03708	46.312	4.16849	6.7768	12.414
ENSONIG00000000791	ENSONIG00000000791	slc25a47a	GL831143.1:2904615-2909096		34.2708	30.8746	4.80214	1.72015	18.4411	16.2365	2.22903	19.1628
ENSONIG00000000792	ENSONIG00000000792	endog	GL831312.1:1210171-1211805		5.74683	18.8616	2.23122	8.61325	1.33501	6.79976	7.56506	8.81063
ENSONIG00000000793	ENSONIG00000000793	abcd1	GL831387.1:454025-474968		6.12073	19.1956	3.28968	4.50699	16.0852	2.46732	10.01	15.976
ENSONIG00000000794	ENSONIG00000000794	phactr2	GL831135.1:3606239-3628244		4.21137	3.13605	0.672126	0.257303	2.24874	0.0371745	2.18253	16.5393
ENSONIG00000000795	ENSONIG00000000795	PPP2R5C (1 of 2)	GL831143.1:3001934-3032071		24.3051	41.0328	8.92622	4.6221	29.8635	4.75854	11.0659	35.1107
ENSONIG00000000796	ENSONIG00000000796	ubtf	GL831149.1:535824-540586		40.0786	31.1171	10.357	10.1902	75.5367	4.58468	16.2173	48.9603
ENSONIG00000000797	ENSONIG00000000797	POGK (2 of 9)	GL831312.1:1214240-1215675		0	0	0.11709	0	0	0	0	0.743264
ENSONIG00000000798	ENSONIG00000000798	pccb	GL831153.1:1545948-1551098		30.2955	53.4046	23.8218	10.7119	35.6504	32.6601	24.3156	20.8164
ENSONIG00000000799	ENSONIG00000000799	ak5l	GL831312.1:1242574-1246336		1.41653	0.550365	0	0	0.172289	0	0	0
ENSONIG00000000800	ENSONIG00000000800	CCDC120 (1 of 2)	GL831387.1:486550-493883		0.104547	0.187737	0.0301977	0	0.270186	0.114903	0.174423	0.0206976
ENSONIG00000000801	ENSONIG00000000801	HCFC1 (1 of 2)	GL831387.1:524414-548600		6.05856	7.02905	2.7953	1.60781	24.3162	11.5525	3.15331	20.5184
ENSONIG00000000802	ENSONIG00000000802	-	GL831312.1:1251172-1262743		0.849417	8.41656	1.80853	1.42984	1.30927	1.33684	1.30695	1.90826
ENSONIG00000000803	ENSONIG00000000803	oprm1	GL831135.1:3652495-3695124		26.7574	0.189421	0.63099	0	0.586705	0.082097	0	0
ENSONIG00000000804	ENSONIG00000000804	rgs17	GL831135.1:3758483-3776873		0.713669	0.73785	0	0	1.54857	1.91853	0	1.26949
ENSONIG00000000805	ENSONIG00000000805	HSP90AA1	GL831143.1:3033201-3039387		119.087	11.317	3.84466	1.3406	242.411	9.12989	3.39801	19.7417
ENSONIG00000000806	ENSONIG00000000806	irak1	GL831387.1:549825-563384		2.73154	5.04723	1.754	2.13388	7.09484	11.5768	1.89043	9.17934
ENSONIG00000000807	ENSONIG00000000807	msl2a (1 of 2)	GL831153.1:1554783-1559918		7.09653	4.66679	2.09292	1.40393	14.5041	3.98889	2.36542	9.53358
ENSONIG00000000808	ENSONIG00000000808	pcnxl2	GL831135.1:3792833-3830917		20.3299	0.444973	0.215695	0	4.99536	0.396685	0.122851	0.129368
ENSONIG00000000809	ENSONIG00000000809	mecp2	GL831387.1:568860-591791		0.295701	0.502075	0.0662043	0.221201	11.596	0.365118	0.526506	0.980385
ENSONIG00000000810	ENSONIG00000000810	tnfsf10 (1 of 2)	GL831153.1:1560336-1565643		1.11246	2.28929	0.810582	0.323591	2.05751	1.20982	1.26867	4.48566
ENSONIG00000000811	ENSONIG00000000811	-	GL831312.1:1276755-1283728		0.575994	5.68509	0.379426	0.221862	4.06595	32.4546	1.24354	0.148659
ENSONIG00000000812	ENSONIG00000000812	atxn7l3	GL831149.1:545540-552175		4.74512	1.39031	0.73619	0.321474	7.1573	2.68771	0	4.63633
ENSONIG00000000813	ENSONIG00000000813	nceh1a	GL831153.1:1569174-1576892		6.26817	2.27349	71.6856	200.566	3.37112	0.258319	0.671416	12.0453
ENSONIG00000000814	ENSONIG00000000814	tmub2	GL831149.1:556126-557647		35.4689	31.6042	7.93234	16.8761	25.4458	93.593	29.6169	20.4088
ENSONIG00000000815	ENSONIG00000000815	-	GL831153.1:1619273-1640441		2.01678	4.18241	0.753421	0.223942	2.93084	0.137368	10.0291	0.646431
ENSONIG00000000816	ENSONIG00000000816	asb16	GL831149.1:557656-565267		2.0574	55.7369	3.12703	2.94525	1.4739	8.17693	30.3361	1.59128
ENSONIG00000000817	ENSONIG00000000817	fgd	GL831387.1:635278-645591		0.506347	0	0.0507955	0	0.729039	0.119805	0	0.0364664
ENSONIG00000000818	ENSONIG00000000818	phf19	GL831312.1:1309239-1313126		0.625927	2.30177	0.877942	0.194882	27.97	23.145	2.57393	9.29017
ENSONIG00000000819	ENSONIG00000000819	hsp90aa1.1	GL831143.1:3039920-3043080		0.0861141	55.0331	0.0261696	0.140788	1.73839	0.0356641	44.474	0.148663
ENSONIG00000000820	ENSONIG00000000820	tfe3a	GL831387.1:655956-669318		4.34291	6.10627	2.24799	2.33031	3.22346	0.185386	3.78092	22.9958
ENSONIG00000000821	ENSONIG00000000821	C17orf53	GL831149.1:566633-579117		1.75231	1.90081	0.135023	0.321206	13.661	36.3579	3.37095	3.49036
ENSONIG00000000822	ENSONIG00000000822	asic2	GL831149.1:839976-965139		18.5483	1.14908	0.341353	0	2.43529	0.786238	0.0869947	0.333924
ENSONIG00000000823	ENSONIG00000000823	wdr20b	GL831143.1:3046511-3058266		12.4136	12.2048	4.77573	4.28613	12.3975	6.6851	6.7623	12.3165
ENSONIG00000000824	ENSONIG00000000824	si:ch211-120p12.3	GL831135.1:3831375-3860977		1.19171	4.18449	4.24669	5.65358	14.5806	4.38753	2.57939	2.73795
ENSONIG00000000825	ENSONIG00000000825	fndc3ba	GL831153.1:1650384-1740520		3.13498	14.1211	4.00352	8.90605	4.98915	0.319436	3.15081	2.56531
ENSONIG00000000826	ENSONIG00000000826	zgc:113363	GL831387.1:675243-681153		0.966057	3.88184	0.731764	0.369098	0.34369	0	0	5.95228
ENSONIG00000000827	ENSONIG00000000827	MPP3 (1 of 2)	GL831149.1:984260-1009555		15.362	0.87058	0.0232458	0.7516	0.175789	0	0	0.0293061
ENSONIG00000000828	ENSONIG00000000828	cxxc1l	GL831387.1:697020-709684		11.0768	1.8628	9.34461	0.906286	12.5803	10.1787	1.30822	1.18759
ENSONIG00000000829	ENSONIG00000000829	rps29	GL831143.1:3068117-3069269		1512.29	6739.14	1276.67	5377.16	1636.63	464.35	3483.83	4732.3
ENSONIG00000000830	ENSONIG00000000830	dab2ipb	GL831312.1:1335814-1349558		23.7204	1.33025	0	0.12072	0.233104	0.45531	0.270222	0.0264872
ENSONIG00000000831	ENSONIG00000000831	MDGA2 (1 of 2)	GL831143.1:3226738-3408825		0.992461	0.0963532	0.135634	0.0836127	0.592773	0.0381801	0	0
ENSONIG00000000832	ENSONIG00000000832	crfb9	GL831135.1:3861767-3867672		0.249718	1.10163	1.58631	0	0.187338	0	9.34712	1.16217
ENSONIG00000000833	ENSONIG00000000833	-	GL831135.1:3874073-3880128		28.5131	37.3451	8.17923	9.60261	25.784	1.986	8.65874	128.747
ENSONIG00000000834	ENSONIG00000000834	gsnb	GL831312.1:1350438-1360981		0.0853295	0.137768	0.0774957	0.130756	0.695018	0.0318909	0	0
ENSONIG00000000835	ENSONIG00000000835	atl2	GL831135.1:3987094-4006602		1.90922	13.7747	5.24488	18.7227	22.0715	9.12317	24.3947	8.92165
ENSONIG00000000836	ENSONIG00000000836	hdac6	GL831387.1:710932-726564		3.79928	5.01556	33.7395	1.96482	42.0118	1.88467	9.03077	9.04411
ENSONIG00000000837	ENSONIG00000000837	si:ch211-198m17.1	GL831149.1:1017677-1027421		0.42987	4.89957	20.8837	2.88667	13.3451	0.150256	0	0.698505
ENSONIG00000000838	ENSONIG00000000838	-	GL831149.1:1017677-1027421		1.55324	1.46972	19.9978	1.01258	17.3767	0.145607	0	1.77689
ENSONIG00000000839	ENSONIG00000000839	ZNF281 (1 of 2)	GL831149.1:1045876-1057121		4.37644	4.22482	1.56835	2.82553	13.0462	2.74047	3.17157	5.4038
ENSONIG00000000840	ENSONIG00000000840	ASTL (1 of 12)	GL831143.1:3226738-3408825		0	0	0	0	0	0	0	0
ENSONIG00000000841	ENSONIG00000000841	slc29a1a	GL831135.1:4010961-4053733		17.2925	19.5976	2.38801	4.60904	28.5477	13.7129	27.5446	12.1652
ENSONIG00000000842	ENSONIG00000000842	ghsrb	GL831153.1:1747720-1749106		0.435603	0	0	1.69761	0.321844	0	0	0
ENSONIG00000000843	ENSONIG00000000843	pld1a	GL831153.1:1764160-1785604		46.1776	9.12967	18.3657	12.3684	9.89322	0.0973699	2.51508	3.39023
ENSONIG00000000844	ENSONIG00000000844	si:dkey-106c17.3	GL831149.1:1064473-1083934		11.1214	0.488426	0	0	0	0.047797	0	0
ENSONIG00000000845	ENSONIG00000000845	-	GL831312.1:1381097-1396480		4.56226	9.18551	3.3604	2.68761	10.2094	2.14493	6.78891	2.98448
ENSONIG00000000846	ENSONIG00000000846	tmem98	GL831149.1:1192543-1209970		2.40318	7.58218	1.91579	0.0739567	5.44585	2.38035	77.5259	0.0359951
ENSONIG00000000847	ENSONIG00000000847	si:dkeyp-57f11.2	GL831149.1:1192543-1209970		0.0504681	10.8288	0.0470838	0.0851744	1.06294	0.315081	141.666	0.0968262
ENSONIG00000000848	ENSONIG00000000848	si:dkeyp-57f11.1	GL831149.1:1222451-1228033		0.2038	0	0.0332698	0	86.1929	2.16379	0.579062	0.0363937
ENSONIG00000000849	ENSONIG00000000849	fkbp3	GL831143.1:3494124-3498783		11.4861	41.1393	10.5653	38.2809	33.3571	11.4619	46.1202	31.5697
ENSONIG00000000850	ENSONIG00000000850	retsat	GL831149.1:1228107-1237455		24.0699	24.8021	35.133	66.4888	8.08284	4.70938	21.8534	9.25178
ENSONIG00000000851	ENSONIG00000000851	-	GL831135.1:4061295-4063933		1.6244	1.18782	0.381468	4.70052	4.9692	1.58742	0.994149	1.02023
ENSONIG00000000852	ENSONIG00000000852	adss	GL831135.1:4067080-4093859		7.0421	10.4674	1.75756	1.12047	20.7812	1.57786	10.5311	3.96292
ENSONIG00000000853	ENSONIG00000000853	DNM1 (1 of 2)	GL831312.1:1420702-1480290		60.2639	1.25033	0.0186158	0.0904802	1.35117	0.0220965	0.102431	0.0259745
ENSONIG00000000854	ENSONIG00000000854	faua	GL831143.1:3494124-3498783		767.198	3007.04	833.638	3677.93	941.984	326.959	1574.44	2445.42
ENSONIG00000000855	ENSONIG00000000855	nmt1a	GL831149.1:1237525-1247138		30.1926	18.9845	15.2394	14.0156	18.7973	77.6083	99.7257	56.6009
ENSONIG00000000856	ENSONIG00000000856	sypa (1 of 2)	GL831387.1:751171-755622		169.913	6.77732	0.12431	0	2.57543	58.7024	5.94129	0.326936
ENSONIG00000000857	ENSONIG00000000857	TNIK (1 of 2)	GL831153.1:1787854-1848614		14.2104	8.27468	0.505625	1.45003	2.76743	0.323555	0.971963	3.50548
ENSONIG00000000858	ENSONIG00000000858	sypa (2 of 2)	GL831387.1:760212-779573		548.112	18.3944	0.0649653	0.203042	4.79719	1.52974	1.24396	0.487089
ENSONIG00000000859	ENSONIG00000000859	prpf39	GL831143.1:3499345-3507281		34.8685	46.6804	22.1455	38.7879	52.2493	3.54742	26.7007	108.537
ENSONIG00000000860	ENSONIG00000000860	plcd3a	GL831149.1:1247277-1275145		17.3273	1.92113	1.41862	7.2015	1.23938	0.759055	52.8286	0.131209
ENSONIG00000000861	ENSONIG00000000861	cacna1f	GL831387.1:785977-819954		0.773426	0.63757	0	0	0.934105	0.104997	0.0361464	0.00499764
ENSONIG00000000862	ENSONIG00000000862	zbtb18	GL831135.1:4120705-4128739		99.2773	7.13503	1.78556	0.525725	8.33949	0.0838295	2.53222	8.13224
ENSONIG00000000863	ENSONIG00000000863	AKT3 (2 of 2)	GL831135.1:4191458-4213701		7.63609	2.3575	0.810095	0.393447	9.28916	0.617791	0.469153	30.7188
ENSONIG00000000864	ENSONIG00000000864	ARF6 (1 of 2)	GL831143.1:3509902-3514881		8.89118	16.2594	13.9925	31.1241	14.4657	8.49004	16.1933	118.799
ENSONIG00000000865	ENSONIG00000000865	-	GL831143.1:3520987-3535002		3.25249	4.77724	1.38892	2.57632	13.4038	0.610533	0.898775	12.4978
ENSONIG00000000866	ENSONIG00000000866	otx2	GL831143.1:3557360-3558885		4.98571	0.391117	0	0	0.31852	0	0	0
ENSONIG00000000867	ENSONIG00000000867	sdccag8	GL831135.1:4218829-4265974		3.21521	1.34242	0.680354	1.07474	16.6405	10.9174	1.82692	5.65525
ENSONIG00000000868	ENSONIG00000000868	arhgap23a	GL831149.1:1283847-1309184		9.46816	0.35201	0.255788	0.129806	1.05598	0.0826683	0.404938	0.251486
ENSONIG00000000869	ENSONIG00000000869	naa30	GL831143.1:3574757-3579384		2.07529	2.30339	1.26981	0.834251	10.4164	0.953427	2.47545	4.60696
ENSONIG00000000870	ENSONIG00000000870	actr10	GL831143.1:3593015-3604003		60.2793	37.8594	13.0788	14.133	39.0429	21.9897	46.0398	37.8688
ENSONIG00000000871	ENSONIG00000000871	tnfaip3	GL831135.1:4272835-4285104		6.16249	6.47693	4.22559	12.6892	2.93761	1.07602	1.43205	18.3908
ENSONIG00000000872	ENSONIG00000000872	slc2a2	GL831153.1:1849084-1858911		0	0.141347	8.29445	222.62	0.582659	0.123438	0	0
ENSONIG00000000873	ENSONIG00000000873	-	GL831312.1:1527638-1544805		1.82975	1.21579	0.82692	0.156289	0.231589	0.0669143	0.0822108	12.5865
ENSONIG00000000874	ENSONIG00000000874	PGF (1 of 2)	GL831143.1:3607841-3615565		0.564253	0	0.401731	0	0.324618	0	0	0.0427106
ENSONIG00000000875	ENSONIG00000000875	si:ch73-387e10.3	GL831143.1:3619212-3627544		12.3843	17.107	19.3706	13.9501	17.4235	0.882582	7.17631	19.8695
ENSONIG00000000876	ENSONIG00000000876	znf410	GL831143.1:3627919-3641168		11.8634	13.9303	6.35946	4.32476	17.997	7.48145	12.802	9.89412
ENSONIG00000000877	ENSONIG00000000877	lasp1	GL831149.1:1359769-1387290		46.7857	32.4509	31.5383	19.3583	35.3054	13.5915	8.80328	99.7394
ENSONIG00000000878	ENSONIG00000000878	entpd5b	GL831143.1:3642051-3647995		6.78127	4.04741	0.55017	0.662423	9.28144	13.8329	11.2146	4.87402
ENSONIG00000000879	ENSONIG00000000879	-	GL831153.1:1859801-1867945		15.2084	12.4468	2.77767	12.4399	36.1891	9.94211	3.90939	7.82919
ENSONIG00000000880	ENSONIG00000000880	PLXDC1 (1 of 2)	GL831149.1:1388506-1399477		4.5412	1.95181	4.87559	0.254651	12.768	3.41614	0.575996	12.9885
ENSONIG00000000881	ENSONIG00000000881	perp	GL831135.1:4295885-4308001		39.5661	150.497	30.1517	64.3058	34.7804	4.01687	38.4168	31.2647
ENSONIG00000000882	ENSONIG00000000882	slc7a14a	GL831153.1:1900482-1923745		4.87551	0.13999	0	0	0.826002	0.134635	0	0.131641
ENSONIG00000000883	ENSONIG00000000883	TMEM26 (1 of 2)	GL831135.1:4313435-4320750		1.49519	2.1681	1.17987	1.08804	0.243331	0.150668	0	5.06809
ENSONIG00000000884	ENSONIG00000000884	aldh6a1 (1 of 2)	GL831143.1:3650352-3659369		42.9946	207.54	28.8698	69.5705	44.8507	4.55292	197.995	19.4746
ENSONIG00000000885	ENSONIG00000000885	-	GL831968.1:19829-21242		0	0	0	0	0	0	0	0.120446
ENSONIG00000000886	ENSONIG00000000886	TMEM26 (2 of 2)	GL831135.1:4327611-4333778		0.15995	1.6457	0.0272536	0	3.38416	0.960785	0	0.133947
ENSONIG00000000887	ENSONIG00000000887	cldn11a	GL831153.1:1930101-1933658		9.25079	7.0609	1.62775	0.356302	194.495	6.09747	18.4561	9.05495
ENSONIG00000000888	ENSONIG00000000888	GRIN3B (1 of 2)	GL831153.1:1983895-2045174		1.58244	0.0963041	0	0.0892618	0.0389137	5.09834	0.788497	0
ENSONIG00000000889	ENSONIG00000000889	ARID5B	GL831135.1:4359804-4432415		2.01893	0.559447	1.85626	0.542187	3.45148	0.0546718	0.602528	4.21047
ENSONIG00000000890	ENSONIG00000000890	arl5c	GL831149.1:1404431-1406449		9.16047	8.80542	4.40408	0	1.62541	0.608377	4.00292	28.5068
ENSONIG00000000891	ENSONIG00000000891	rtkn2a	GL831135.1:4435908-4445484		0.537556	1.17015	0.358353	0.428592	13.794	8.43496	2.36737	7.08226
ENSONIG00000000892	ENSONIG00000000892	cacnb1	GL831149.1:1411675-1445197		22.7534	1.04746	0.0942773	0.116659	1.80919	0.131753	28.2719	1.19611
ENSONIG00000000893	ENSONIG00000000893	lppr3a	GL831153.1:2051331-2068399		2.97148	0	0	0	1.1163	0	0	0.0149537
ENSONIG00000000894	ENSONIG00000000894	LRFN5 (1 of 2)	GL831143.1:3669639-3676636		13.3713	0.150601	0.132074	0	4.51631	0.0313309	0	0
ENSONIG00000000895	ENSONIG00000000895	cep170a	GL831135.1:4448324-4487528		9.75532	8.98899	0.90093	1.12811	18.3957	0.285005	3.26064	8.69679
ENSONIG00000000896	ENSONIG00000000896	yy1a (1 of 2)	GL831143.1:3691430-3695555		53.0284	33.3002	9.69795	15.8687	38.5216	21.4787	20.8523	44.0105
ENSONIG00000000897	ENSONIG00000000897	palm1b	GL831153.1:2097098-2103095		48.7013	144.888	4.36526	0.599935	8.74515	0.797849	3.5411	2.70993
ENSONIG00000000898	ENSONIG00000000898	evlb	GL831143.1:3698116-3715110		16.5804	0.785541	0	0	1.40896	1.58701	0.263822	0.0620789
ENSONIG00000000899	ENSONIG00000000899	ptbp1a	GL831153.1:2110395-2120595		2.78453	7.55015	3.52547	2.38407	32.4138	4.19065	2.33072	35.5931
ENSONIG00000000900	ENSONIG00000000900	rpl19 (1 of 2)	GL831149.1:1458572-1461650		1762.59	5169.2	1596.45	6106.48	1681.7	412.481	3268.01	4258.32
ENSONIG00000000901	ENSONIG00000000901	hint1	GL831135.1:4491570-4493857		240.556	337.346	145.1	209.049	184.158	139.292	565.046	232.142
ENSONIG00000000902	ENSONIG00000000902	st8sia6 (1 of 3)	GL831149.1:1475633-1481576		6.40731	16.5375	3.48289	4.10721	6.34322	0.342641	34.0631	12.5158
ENSONIG00000000903	ENSONIG00000000903	dync2li1	GL831135.1:4497696-4517140		6.28003	2.91229	1.58823	14.1316	13.0474	5.15986	0	1.70571
ENSONIG00000000904	ENSONIG00000000904	-	GL831143.1:3752312-3755276		0.767274	2.56764	0	0	1.18776	0	0	0.930952
ENSONIG00000000905	ENSONIG00000000905	efna2	GL831153.1:2205083-2211860		10.8539	3.66924	0.242045	0	3.76174	1.20458	5.43236	0
ENSONIG00000000906	ENSONIG00000000906	MAPKBP1 (1 of 2)	GL831143.1:3831749-3853285		0.280797	1.1136	0.0501104	0	0.313827	0.0109992	0	0.141052
ENSONIG00000000907	ENSONIG00000000907	SNAP23	GL831153.1:2217851-2229509		11.7249	65.1985	18.9278	19.7257	39.1419	79.2544	18.8214	67.0775
ENSONIG00000000908	ENSONIG00000000908	magixa	GL831387.1:844791-899434		1.60317	1.54438	0.507889	1.27504	1.69864	0.151258	0.164415	0
ENSONIG00000000909	ENSONIG00000000909	st8sia6 (2 of 3)	GL831149.1:1544324-1548768		0	0.727922	1.14135	0	1.23765	1.06467	2.18744	0
ENSONIG00000000910	ENSONIG00000000910	GJC1 (1 of 3)	GL831149.1:1559175-1560633		1.04296	0	0.0523018	0	0.245735	0	0	0.0387542
ENSONIG00000000911	ENSONIG00000000911	abcg5	GL831135.1:4497696-4517140		0.0960057	0	0	22.3667	0.273504	0	0	0
ENSONIG00000000912	ENSONIG00000000912	eftud2	GL831149.1:1607030-1620599		21.4889	9.92166	6.12361	3.95175	50.6861	47.88	9.0867	45.9827
ENSONIG00000000913	ENSONIG00000000913	-	GL831143.1:3854780-3858162		0.247757	20.4778	2.6567	0.705927	0.877731	0.781465	0.877893	0
ENSONIG00000000914	ENSONIG00000000914	sptb	GL831153.1:2234500-2270396		3.23585	32.1491	1.33376	0.361291	3.38438	0.189447	7.88441	40.295
ENSONIG00000000915	ENSONIG00000000915	abcg8	GL831135.1:4517205-4525950		0.0616771	0	0	11.4974	0.0478674	0	0	0
ENSONIG00000000916	ENSONIG00000000916	pak7	GL831143.1:3867006-3935289		18.3063	6.92043	0.0518178	0.839623	3.55017	0.633319	2.92231	0.178358
ENSONIG00000000917	ENSONIG00000000917	lrpprc	GL831135.1:4526725-4598583		14.5565	18.2442	4.4245	4.19049	19.1248	9.67941	9.86136	21.0451
ENSONIG00000000918	ENSONIG00000000918	LAMP5	GL831143.1:3941379-3945580		106.701	6.05312	0.0738047	0.372803	0.347183	0	0	0.0387878
ENSONIG00000000919	ENSONIG00000000919	PLCB4	GL831143.1:3954003-3983676		10.3207	1.15137	0.299604	0	4.16677	0.773707	0.400965	0.305026
ENSONIG00000000920	ENSONIG00000000920	SLC25A29 (2 of 3)	AERX01072772.1:1062-5195		0	0	0	0	0	0	0	0
ENSONIG00000000921	ENSONIG00000000921	znf652	GL831149.1:1629817-1639437		2.2182	1.28357	0.550371	0.757882	1.62979	0.941515	2.69278	1.33469
ENSONIG00000000922	ENSONIG00000000922	ighv14-1 (1 of 16)	GL832571.1:3734-4159		0	0	0	0	0	0	0	3.85415
ENSONIG00000000923	ENSONIG00000000923	phb	GL831149.1:1645685-1649195		52.5729	136.906	41.6758	63.8754	50.7635	102.185	120.876	92.9967
ENSONIG00000000924	ENSONIG00000000924	si:busm1-163l24.3	GL831149.1:1653135-1657561		1.56389	5.06483	2.31472	0	5.07057	0.14481	0.525925	16.9616
ENSONIG00000000925	ENSONIG00000000925	vat1	GL831149.1:1660107-1691612		83.9163	16.48	18.9957	1.98384	16.6794	1.16941	8.79202	2.19355
ENSONIG00000000926	ENSONIG00000000926	znhit2	GL831135.1:4600306-4602031		3.95388	2.77058	1.12338	1.37591	16.2899	20.8011	3.3308	4.07339
ENSONIG00000000927	ENSONIG00000000927	ppm1ba	GL831135.1:4631071-4634293		16.0977	17.5094	2.79949	6.73272	44.9172	23.8812	6.09522	14.2155
ENSONIG00000000928	ENSONIG00000000928	slc3a1	GL831135.1:4643404-4650400		5.63076	1.33353	106.216	0.677533	3.15824	1.05077	0.633686	0.732517
ENSONIG00000000929	ENSONIG00000000929	SLC19A1	GL831414.1:27276-40882		22.5446	10.7421	95.3397	78.2739	18.4405	7.80553	8.51091	13.6686
ENSONIG00000000930	ENSONIG00000000930	-	GL831153.1:2281911-2292222		0	0	0	0	0	0	2.48926	0
ENSONIG00000000931	ENSONIG00000000931	cdan1	GL831153.1:2312912-2326681		4.03128	5.5882	2.27827	2.33388	11.176	16.0388	4.94928	8.31242
ENSONIG00000000932	ENSONIG00000000932	arpc2	GL831414.1:59855-73040		48.341	108.956	44.9705	27.0926	28.4143	22.5164	78.3052	212.999
ENSONIG00000000933	ENSONIG00000000933	PLCB1 (1 of 2)	GL831143.1:4022408-4138224		9.85765	2.79442	0.607734	0.0635849	4.48101	0.127092	1.17567	0.188681
ENSONIG00000000934	ENSONIG00000000934	prepl	GL831135.1:4650615-4768846		0.450013	0.228913	0.16407	0.109681	9.0051	7.06639	0.753592	1.39809
ENSONIG00000000935	ENSONIG00000000935	rnd2	GL831149.1:1702452-1733615		13.9899	2.08013	2.22176	0.206393	4.45938	3.03497	26.9539	0.45249
ENSONIG00000000936	ENSONIG00000000936	MRC2	GL831149.1:1786288-1809902		4.39371	2.97801	2.29208	0.882466	5.36522	0.143337	2.72846	7.12268
ENSONIG00000000937	ENSONIG00000000937	camkmt	GL831135.1:4650615-4768846		3.38162	1.44862	0.697065	1.12577	7.92981	2.8735	1.27607	3.73755
ENSONIG00000000938	ENSONIG00000000938	zgc:92380	GL831414.1:73309-82257		0.723294	0.169073	0.295191	0	0.93453	0.134513	0	0.70991
ENSONIG00000000939	ENSONIG00000000939	six3b	GL831135.1:4854517-4857141		23.2388	11.7842	0.065361	0	2.65344	0	0	0
ENSONIG00000000940	ENSONIG00000000940	ttbk2	GL831153.1:2328573-2349710		22.2022	5.75279	0.410647	0.202794	3.35025	0.05253	0.52793	0.234693
ENSONIG00000000941	ENSONIG00000000941	six2a	GL831135.1:4876083-4880480		1.23113	0.732748	0.443354	0	0.189489	0.0266568	32.4038	0.0349658
ENSONIG00000000942	ENSONIG00000000942	nitr13 (1 of 44)	GL831156.1:21014-22492		0	1.24572	0	0	0.573911	0	0	0.462753
ENSONIG00000000943	ENSONIG00000000943	nitr13 (2 of 44)	GL831156.1:42461-43337		0	1.85767	0	0	0	0	0	0.826473
ENSONIG00000000944	ENSONIG00000000944	nitr13 (3 of 44)	GL831156.1:55976-59114		0	0	0	0	0	0.140968	0	0.101372
ENSONIG00000000945	ENSONIG00000000945	srbd1	GL831135.1:4969569-5023691		1.92004	0.752694	0.570899	0.627586	10.6287	2.87184	0.811313	2.9791
ENSONIG00000000946	ENSONIG00000000946	nitr13 (4 of 44)	GL831156.1:132062-134800		0	0.93268	0	0	0	0.12475	0	0.348939
ENSONIG00000000947	ENSONIG00000000947	tmem62	GL831153.1:2353790-2359191		16.3157	6.75927	1.95358	5.02557	10.3167	1.37982	2.64539	5.17317
ENSONIG00000000948	ENSONIG00000000948	-	GL831414.1:73309-82257		0.960932	0	0.372465	0	0.341745	0	0.55275	0.093679
ENSONIG00000000949	ENSONIG00000000949	PTGR2	GL831153.1:2362762-2368064		16.2995	48.284	10.6702	16.7305	22.8099	126.347	39.0601	23.7705
ENSONIG00000000950	ENSONIG00000000950	nitr13 (5 of 44)	GL831156.1:144823-176717		0	2.18484	0.0846499	0.481971	0.91152	0	0	1.82738
ENSONIG00000000951	ENSONIG00000000951	cd74b	GL831135.1:5039642-5043782		918.151	1468.36	638.381	157.167	208.795	110.415	267.003	2752.31
ENSONIG00000000952	ENSONIG00000000952	ELMSAN1 (1 of 2)	GL831153.1:2371824-2392161		18.6886	12.9558	3.14262	2.22288	20.0539	0.558975	7.02952	9.03901
ENSONIG00000000953	ENSONIG00000000953	nitr13 (6 of 44)	GL831156.1:144823-176717		0	0	0	0	1.10163	0	0	0.480854
ENSONIG00000000954	ENSONIG00000000954	nitr13 (7 of 44)	GL831156.1:144823-176717		0	2.27665	0.120628	0	0.672108	0	0	1.24323
ENSONIG00000000955	ENSONIG00000000955	crip2	GL831153.1:2402051-2451621		144.428	1303.6	157.864	24.1774	31.162	21.4886	229.573	1266.87
ENSONIG00000000956	ENSONIG00000000956	nitr13 (8 of 44)	GL831156.1:180701-182964		0	0	0.0915165	0.265507	2.46156	0	0	0.681834
ENSONIG00000000957	ENSONIG00000000957	GPBAR1	GL831414.1:88619-89603		0.303872	0	0.707558	0	0.48011	0.269001	0.557076	6.17562
ENSONIG00000000958	ENSONIG00000000958	bmp2b	GL831143.1:4168904-4174908		0.643355	0.136814	0.615899	4.01727	1.04806	0.0589339	0	1.34346
ENSONIG00000000959	ENSONIG00000000959	aamp	GL831414.1:100341-109051		9.11194	15.2847	4.93468	14.4291	32.6719	54.6854	38.1664	16.8008
ENSONIG00000000960	ENSONIG00000000960	tlk2	GL831149.1:1810318-1823708		14.4722	17.4227	3.6674	3.04253	30.0552	15.4425	11.7686	11.6906
ENSONIG00000000961	ENSONIG00000000961	fermt1	GL831143.1:4198133-4208728		0.0657629	0	0.208578	0.21698	0.897487	0.0290671	0	0
ENSONIG00000000962	ENSONIG00000000962	nitr13 (9 of 44)	GL831156.1:212663-216182		0.104435	0.588887	0.0354687	0	0.0966677	0.0620037	0	0.793417
ENSONIG00000000963	ENSONIG00000000963	PLD5 (1 of 2)	GL831135.1:5099831-5123701		2.18642	0	0.192842	0	2.11641	0	0	0
ENSONIG00000000964	ENSONIG00000000964	nitr13 (10 of 44)	GL831156.1:216665-217746		0	0	0.126237	0	0.34329	0	0	0.15652
ENSONIG00000000965	ENSONIG00000000965	nitr13 (11 of 44)	GL831156.1:223770-226364		0	0.717987	0.639301	0	0	0	0.767669	1.0126
ENSONIG00000000966	ENSONIG00000000966	hdac4 (1 of 2)	GL831414.1:123054-195983		1.3675	0.43908	0.471641	0	3.24127	0.11184	0.186683	1.82068
ENSONIG00000000967	ENSONIG00000000967	ccdc104	GL831135.1:5127796-5139745		21.9516	7.88374	24.9646	0.568638	20.1474	8.2247	4.20313	1.05794
ENSONIG00000000968	ENSONIG00000000968	trmt6	GL831143.1:4211341-4220122		7.22437	8.18178	5.20772	3.33052	29.0974	26.6701	7.47319	22.2633
ENSONIG00000000969	ENSONIG00000000969	MTA1	GL831153.1:2475182-2503653		14.78	3.08433	1.0934	1.62057	16.8716	2.05255	2.73864	10.4309
ENSONIG00000000970	ENSONIG00000000970	nitr13 (12 of 44)	GL831156.1:228224-230473		0.49258	6.55137	1.53462	0.315412	0.565421	0.269276	0	5.53418
ENSONIG00000000971	ENSONIG00000000971	-	GL831143.1:4238901-4249429		0	0	7.80533	0.380442	0.209473	0	0	0.039549
ENSONIG00000000972	ENSONIG00000000972	nitr13 (13 of 44)	GL831156.1:239901-243549		0	0	0.0807682	0	0	0	0	0.479961
ENSONIG00000000973	ENSONIG00000000973	zfp36l1a	GL831153.1:2610652-2613034		12.0188	45.4796	22.2351	51.2618	32.766	6.23404	15.5485	66.0051
ENSONIG00000000974	ENSONIG00000000974	SMEK2	GL831135.1:5144344-5152961		6.60594	13.1172	4.73786	20.4988	52.8555	8.29283	12.7302	32.2264
ENSONIG00000000975	ENSONIG00000000975	plekhh1	GL831153.1:2680631-2714892		0.701518	1.1062	4.0974	0.83943	7.85628	1.72279	1.3987	0.286542
ENSONIG00000000976	ENSONIG00000000976	nitr13 (14 of 44)	GL831156.1:256773-260590		0	0.227872	0	0	0.855203	0	0	0.527054
ENSONIG00000000977	ENSONIG00000000977	mettl2a	GL831149.1:1823803-1827763		5.30238	6.62054	2.26604	5.62955	11.3978	10.8618	24.3556	16.2701
ENSONIG00000000978	ENSONIG00000000978	gpcpd1	GL831143.1:4252181-4266605		56.8506	51.6097	10.852	70.9156	27.7739	10.4218	14.5224	35.8487
ENSONIG00000000979	ENSONIG00000000979	nitr13 (15 of 44)	GL831156.1:265405-267212		0	0.989853	0	0	0.435462	0	0	0.469968
ENSONIG00000000980	ENSONIG00000000980	itgb3a	GL831149.1:1832390-1844548		1.3666	7.26045	7.1886	0.81139	1.68902	0.33972	1.64922	8.83716
ENSONIG00000000981	ENSONIG00000000981	nitr13 (16 of 44)	GL831156.1:282243-283859		0	0	0	0	0	0	0	0.757299
ENSONIG00000000982	ENSONIG00000000982	nitr13 (17 of 44)	GL831156.1:289316-315308		0.0463009	2.80839	0.134949	0	1.28525	0	0	9.30243
ENSONIG00000000983	ENSONIG00000000983	PNPT1	GL831135.1:5155719-5163343		2.38962	3.81647	0.949706	1.06888	9.74974	7.68752	2.21849	6.67594
ENSONIG00000000984	ENSONIG00000000984	NAPB (1 of 2)	GL831143.1:4269299-4285418		61.0609	13.7356	1.14946	2.33727	6.72032	8.38026	2.16595	2.76429
ENSONIG00000000985	ENSONIG00000000985	slc25a21	GL831153.1:2772780-2798980		4.99009	4.00788	18.7665	38.5711	14.7324	5.03353	4.2048	5.49929
ENSONIG00000000986	ENSONIG00000000986	nitr13 (18 of 44)	GL831156.1:289316-315308		0	0	0	0	0.341544	0	0	0.158829
ENSONIG00000000987	ENSONIG00000000987	nitr13 (19 of 44)	GL831156.1:318777-320111		0	0	0	0	1.70819	0	0	0.431992
ENSONIG00000000988	ENSONIG00000000988	slit3	GL831156.1:389216-455558		1.39532	2.21576	0.530917	0.268818	2.31552	0.0661461	0.0762372	0.138146
ENSONIG00000000989	ENSONIG00000000989	hnrnpa0l	GL831143.1:4269299-4285418		22.148	16.4507	3.33801	2.7189	19.2373	10.3109	4.86664	7.63368
ENSONIG00000000990	ENSONIG00000000990	pax9	GL831153.1:2802772-2811463		0.075908	0.312313	0.0241577	0	0.274583	0.227905	0	0.0276226
ENSONIG00000000991	ENSONIG00000000991	-	GL831414.1:203069-213249		29.2254	58.6875	31.3079	44.7652	59.4972	31.2887	15.2506	180.055
ENSONIG00000000992	ENSONIG00000000992	trib2	GL831143.1:4328783-4333287		13.0854	16.0859	6.07751	0.88358	5.18645	0.900509	2.62723	4.54771
ENSONIG00000000993	ENSONIG00000000993	-	GL831414.1:273588-281674		169.813	5.76476	0.281747	0	5.69049	0.497492	0	1.24286
ENSONIG00000000994	ENSONIG00000000994	nkx2.2b	GL831153.1:2824077-2825033		0	0	0	0	0	0	0	0
ENSONIG00000000995	ENSONIG00000000995	nkx2.1b (1 of 2)	GL831153.1:2833458-2837641		2.88235	0	0.0155285	0	0.186056	0.0210769	0	0
ENSONIG00000000996	ENSONIG00000000996	KLHL29	GL831143.1:4474749-4597927		18.9037	1.80267	1.33169	0.195939	26.6995	11.2736	2.86251	0.206115
ENSONIG00000000997	ENSONIG00000000997	mbip	GL831153.1:2856313-2861649		10.3069	6.29584	0.480033	1.82574	27.8757	42.5715	9.47442	6.44946
ENSONIG00000000998	ENSONIG00000000998	tcap	GL831149.1:1871880-1875212		0.54032	969.696	0.0876331	0.727606	0.555393	0.232698	5801.27	0.372576
ENSONIG00000000999	ENSONIG00000000999	MREG	GL831149.1:1878718-1881652		0.51053	0.533457	0	0	0.155161	0.0874941	0.188484	0.404095
ENSONIG00000001000	ENSONIG00000001000	atad2b	GL831143.1:4598064-4666909		2.54859	1.2118	0.766689	1.20663	5.76075	1.46515	1.03005	6.12459
ENSONIG00000001001	ENSONIG00000001001	RPS6KA5	GL831153.1:2905355-2921340		0.196325	0.55475	0.580401	0.324163	9.23238	1.40552	0.118985	3.28128
ENSONIG00000001002	ENSONIG00000001002	stard3	GL831149.1:1881827-1893772		15.2521	23.5399	8.4198	17.378	12.8892	7.89982	8.13152	52.1293
ENSONIG00000001003	ENSONIG00000001003	gemin8	GL831414.1:322739-325403		17.3698	16.644	4.08984	4.26027	55.1444	45.9073	21.9397	21.8557
ENSONIG00000001004	ENSONIG00000001004	-	GL831414.1:381714-385220		0.182362	1.37089	0.581056	0.676003	0.1561	0.525771	0	2.83432
ENSONIG00000001005	ENSONIG00000001005	CCDC88A	GL831135.1:5175745-5239065		5.49936	0.296486	0.955034	0.185992	3.23477	0.425514	0.386798	0.394824
ENSONIG00000001006	ENSONIG00000001006	-	GL831414.1:477904-481693		0.112452	4.47085	13.2918	1.77691	0.55003	0.449578	1.1869	23.8479
ENSONIG00000001007	ENSONIG00000001007	-	GL831414.1:508379-510183		0	0	0	0	0	0	0	3.94756
ENSONIG00000001008	ENSONIG00000001008	-	GL831414.1:511363-511941		0	1.80793	0.255403	0	0.793971	14.6189	3.74459	4.09183
ENSONIG00000001009	ENSONIG00000001009	-	GL831414.1:707022-708842		0	3.74984	1.03735	1.25882	3.62724	6.71886	0.678772	5.87884
ENSONIG00000001010	ENSONIG00000001010	-	GL831414.1:741009-741692		0	0	0.654729	0	0	2.15781	0	1.55321
ENSONIG00000001011	ENSONIG00000001011	rnasel4 (1 of 5)	GL831414.1:780402-782575		86.6531	5.80573	1.88186	0.299292	1.3963	0.099979	0	37.3662
ENSONIG00000001012	ENSONIG00000001012	ubxn2a	GL831143.1:4670364-4676804		33.537	34.7928	10.2221	9.87269	11.8643	3.10145	83.9097	21.4303
ENSONIG00000001013	ENSONIG00000001013	mfsd2b	GL831143.1:4680166-4702284		4.84805	0.154924	0.0271111	0	1.39966	3.13924	0.477011	0
ENSONIG00000001014	ENSONIG00000001014	ppp1r1b	GL831149.1:1895472-1917616		15.0386	7.00931	0.815763	53.2561	1.09169	1.26185	3.87944	2.58126
ENSONIG00000001015	ENSONIG00000001015	cdk12	GL831149.1:1963127-1974107		6.11009	6.12866	2.10395	2.33009	11.8998	3.14609	4.54146	10.1713
ENSONIG00000001016	ENSONIG00000001016	HADHA (1 of 2)	GL831153.1:2924760-2931688		29.9166	145.677	28.9339	31.2635	34.4167	30.4349	62.8449	42.3592
ENSONIG00000001017	ENSONIG00000001017	C2orf44	GL831143.1:4680166-4702284		1.39211	6.8547	0.351873	0.659901	16.7057	7.80123	1.32443	2.39855
ENSONIG00000001018	ENSONIG00000001018	CAMK2G (1 of 2)	GL831135.1:5246223-5324053		28.6834	12.5586	1.4575	0.986151	19.8199	1.94664	6.4876	33.9798
ENSONIG00000001019	ENSONIG00000001019	fbxl20	GL831149.1:1979253-1992011		10.7918	5.21091	1.99848	1.72887	4.57089	0.626249	4.66496	6.18861
ENSONIG00000001020	ENSONIG00000001020	fkbp1b	GL831143.1:4703514-4713738		160.18	161.309	14.704	50.4137	296.777	21.4502	91.0978	17.9924
ENSONIG00000001021	ENSONIG00000001021	mut	GL831143.1:4715354-4726829		26.6831	60.3348	19.1232	22.9804	34.6476	16.3462	32.2323	19.3358
ENSONIG00000001022	ENSONIG00000001022	si:ch211-223f7.1	GL831143.1:4732347-4743315		1.12068	0	0	0	0.136819	0	0	0
ENSONIG00000001023	ENSONIG00000001023	-	GL831135.1:5338546-5341720		0.121941	0.221082	0	0	3.99511	0.771052	0.444951	0.0550861
ENSONIG00000001024	ENSONIG00000001024	-	GL831143.1:4768494-4769512		1.57346	0	0	0	0	0.595988	0	0
ENSONIG00000001025	ENSONIG00000001025	runx2b	GL831143.1:4853555-4920895		1.34429	0.0427044	0.114413	0.117252	0.73964	0.0746338	0.593914	0.0254173
ENSONIG00000001026	ENSONIG00000001026	SYNPO2L (1 of 2)	GL831135.1:5351689-5360857		0.102248	43.8145	0.128894	0.498488	0.218959	0.0195455	216.552	0.0361228
ENSONIG00000001027	ENSONIG00000001027	STAC2 (1 of 2)	GL831149.1:1997911-2025210		14.4067	0.538054	0.0890751	0	0.397306	0	0.0821096	0
ENSONIG00000001028	ENSONIG00000001028	MYOZ1 (1 of 2)	GL831135.1:5367907-5370624		1.16694	10.1614	0.249502	1.39509	2.97709	0.244103	5446.72	0.0695865
ENSONIG00000001029	ENSONIG00000001029	hhat	GL831135.1:5372861-5388045		4.048	2.08756	0.898229	0.293519	13.7446	4.01519	2.2898	1.10344
ENSONIG00000001030	ENSONIG00000001030	-	GL831149.1:2048450-2052194		0.623627	0.138773	0	0	4.96478	185.928	9.45323	0
ENSONIG00000001031	ENSONIG00000001031	clic5b	GL831143.1:4926651-4938331		0.569688	0.892356	51.5967	50.3609	1.57617	0	0.573605	0.844429
ENSONIG00000001032	ENSONIG00000001032	kif3cb	GL831153.1:2932844-2939004		44.3233	0.187981	0.0519672	0.0938856	5.64367	2.05465	0.110126	0.152563
ENSONIG00000001033	ENSONIG00000001033	kcnh1a	GL831135.1:5397244-5445667		0.187982	0	0	0	0.561346	1.60482	0	0.0705399
ENSONIG00000001034	ENSONIG00000001034	ADAM11 (1 of 2)	GL831149.1:2055237-2073030		43.5233	0.142758	0.0305778	0	1.0317	3.35815	0.749906	0
ENSONIG00000001035	ENSONIG00000001035	enpp5	GL831143.1:4941365-4946235		35.6768	18.974	3.65592	2.79882	3.83103	1.30859	15.8578	11.1926
ENSONIG00000001036	ENSONIG00000001036	asxl2	GL831153.1:2939139-2952289		1.89909	2.67969	0.769871	0.631957	3.99235	0.259908	1.45738	9.98977
ENSONIG00000001037	ENSONIG00000001037	phip	GL831143.1:4969046-5002687		1.14772	1.78119	0.491251	0.445383	2.95545	0.0867851	0.718421	6.39194
ENSONIG00000001038	ENSONIG00000001038	fgfrl1a	GL831156.1:676295-741048		0.42483	27.8616	14.3584	15.5211	4.68923	0.166514	0.966128	0.310775
ENSONIG00000001039	ENSONIG00000001039	-	GL831135.1:5451560-5458978		3.36661	13.9845	3.21715	6.17536	12.6246	2.14057	2.19314	9.5897
ENSONIG00000001040	ENSONIG00000001040	RFFL	GL831203.1:1543-12011		1.55856	5.21894	1.95974	1.35244	28.1587	7.73823	5.5113	7.9842
ENSONIG00000001041	ENSONIG00000001041	dtnbb	GL831153.1:2955662-2993288		44.6431	2.07156	0.0468316	0	1.39751	0	0.0644622	0.0560497
ENSONIG00000001042	ENSONIG00000001042	eif4h	GL831203.1:17077-24192		80.3142	113.187	46.6002	71.6977	64.7919	27.7244	141.333	173.68
ENSONIG00000001043	ENSONIG00000001043	-	GL831156.1:759333-761277		0	0	0	1.88653	0	0	0	0
ENSONIG00000001044	ENSONIG00000001044	spon2b	GL831156.1:762761-770774		0.403654	8.10464	0.0718069	0.385123	0.123498	0.557309	10.8952	0.149012
ENSONIG00000001045	ENSONIG00000001045	ANO7	GL831203.1:26427-39755		0.560553	0	0	0.124772	4.06557	1.25435	0.13472	0.0438515
ENSONIG00000001046	ENSONIG00000001046	CTBP1	GL831156.1:803654-828228		13.405	8.07623	1.9516	0.507941	1.60085	0.244639	4.28539	13.0591
ENSONIG00000001047	ENSONIG00000001047	-	GL831203.1:91090-93658		1.04799	2.40115	0.241903	0	0.194004	0	0	6.60949
ENSONIG00000001048	ENSONIG00000001048	ECE2	GL831203.1:122928-163089		64.5165	14.8604	1.40443	0.524598	10.6747	5.83552	2.78794	0.549361
ENSONIG00000001049	ENSONIG00000001049	irak1bp1	GL831143.1:5011187-5013975		0.763187	1.27534	0.910855	0.395286	47.7216	23.7974	3.2503	8.88119
ENSONIG00000001050	ENSONIG00000001050	dnmt3ab	GL831153.1:2998373-3042127		1.12127	0.440351	0.291536	0.0832115	0.847633	0	0	3.22595
ENSONIG00000001051	ENSONIG00000001051	tbx18	GL831143.1:5076793-5086615		1.63852	7.4761	0.0308155	0	0.37665	0.0887194	12.3911	0.0382975
ENSONIG00000001052	ENSONIG00000001052	leprel4	GL831149.1:2076288-2081979		1.18253	3.75187	0.723744	0.538908	4.76346	2.39116	2.19654	0.708178
ENSONIG00000001053	ENSONIG00000001053	-	GL831143.1:5116287-5130134		0.0417589	0.070333	8.84864	0	0.477903	0.0967566	0.153155	0.0198528
ENSONIG00000001054	ENSONIG00000001054	maea	GL831156.1:831433-847719		24.1179	28.5802	11.1635	11.7759	41.9095	67.505	18.1977	50.8354
ENSONIG00000001055	ENSONIG00000001055	EPT1	GL831143.1:5140271-5147855		2.69887	1.43596	0.38466	0.438708	8.71255	0.793962	0	6.31057
ENSONIG00000001056	ENSONIG00000001056	fkbp10a	GL831149.1:2084331-2102160		5.70463	8.56108	2.43744	2.49531	26.0545	7.75785	3.22839	10.5019
ENSONIG00000001057	ENSONIG00000001057	sst1.1	GL831203.1:174359-177711		158.675	0	0	2.44292	0	0.629785	0	0
ENSONIG00000001058	ENSONIG00000001058	col4a3	GL831203.1:204192-260460		1.56073	0.0809506	0.993353	0.354294	2.50198	0.799288	0	0.00695002
ENSONIG00000001059	ENSONIG00000001059	KLHL3	GL831156.1:859651-871173		5.20626	2.32516	0.875109	0.720965	9.33738	0.620982	1.67336	2.11787
ENSONIG00000001060	ENSONIG00000001060	agbl5	GL831143.1:5151129-5169571		6.73653	3.50473	1.11398	1.89385	13.8027	2.01159	2.12482	2.13846
ENSONIG00000001061	ENSONIG00000001061	NT5C3B (1 of 2)	GL831149.1:2084331-2102160		25.0553	15.2384	6.29226	8.9827	21.5553	19.0798	22.9065	39.4722
ENSONIG00000001062	ENSONIG00000001062	-	GL831143.1:5172346-5181439		0	0	0	0.51956	5.21758	0.0502941	0	0
ENSONIG00000001063	ENSONIG00000001063	dpysl5a	GL831153.1:3051037-3071133		21.366	1.91868	0.110893	0	1.40732	0	0	0.137387
ENSONIG00000001064	ENSONIG00000001064	KLHL11 (1 of 2)	GL831149.1:2105562-2108276		26.5803	5.4629	1.41322	1.63568	7.0801	18.4953	3.00523	4.08507
ENSONIG00000001065	ENSONIG00000001065	-	GL831135.1:5461783-5527048		38.5048	79.3743	27.9301	103.977	39.6319	48.141	24.4418	22.5471
ENSONIG00000001066	ENSONIG00000001066	aclya	GL831149.1:2108807-2131026		18.3316	2.01296	14.4081	19.1848	4.75462	1.64994	1.07478	5.38078
ENSONIG00000001067	ENSONIG00000001067	BCL11B (1 of 2)	GL831143.1:5309035-5342624		2.54374	0.973175	0.666288	0.316645	0.524845	0.0323752	0	5.23049
ENSONIG00000001068	ENSONIG00000001068	fam13b	GL831156.1:880835-928207		10.0083	5.72878	3.28645	0.676192	3.76718	0.247316	5.49684	2.85963
ENSONIG00000001069	ENSONIG00000001069	ccnk	GL831143.1:5347143-5354103		6.7211	8.90192	2.49302	2.39233	22.8467	9.78832	6.75967	11.5819
ENSONIG00000001070	ENSONIG00000001070	-	GL831135.1:5528411-5534983		0	0	0.0442356	427.471	0	0	0.277212	0.175057
ENSONIG00000001071	ENSONIG00000001071	ccdc85ca	GL831143.1:5358566-5402078		9.59748	3.25402	2.48816	0.74845	2.74645	6.15286	1.15668	0.478029
ENSONIG00000001072	ENSONIG00000001072	mapre3a	GL831153.1:3071602-3079928		99.2465	26.6981	4.92314	4.53015	21.0187	0.0302634	17.6824	0.624222
ENSONIG00000001073	ENSONIG00000001073	cnp	GL831149.1:2132727-2136730		22.4573	36.065	26.3203	18.3409	68.9943	172.861	33.4307	223.083
ENSONIG00000001074	ENSONIG00000001074	cyp46a2	GL831143.1:5451069-5456161		8.46495	13.0357	7.01398	22.6884	10.9704	1.54587	2.19544	8.80419
ENSONIG00000001075	ENSONIG00000001075	col4a4	GL831203.1:283601-315102		0.0244807	0	0.0764793	0	1.23862	0.260599	0	0
ENSONIG00000001076	ENSONIG00000001076	ttc25	GL831149.1:2136951-2144499		2.17069	0	9.8347	0.132551	37.5189	1.53684	0.149702	0.941316
ENSONIG00000001077	ENSONIG00000001077	eif4ea	GL831156.1:1556343-1562174		4.00879	2.89551	1.07689	1.16639	43.5484	22.6556	5.46082	12.8707
ENSONIG00000001078	ENSONIG00000001078	adh5	GL831156.1:1562563-1568160		36.7159	68.2746	144.583	316.669	97.822	79.6239	25.0107	70.7893
ENSONIG00000001079	ENSONIG00000001079	-	GL831153.1:3111619-3116822		0.191558	0.355122	0	173.433	1.02354	0	0	3.69082
ENSONIG00000001080	ENSONIG00000001080	dnajc7	GL831149.1:2144575-2151073		58.7199	46.9037	10.5568	11.5965	35.3083	17.2786	30.1785	38.9241
ENSONIG00000001081	ENSONIG00000001081	nkiras2	GL831149.1:2151520-2156191		21.52	23.8076	8.16964	6.24239	14.8616	4.57241	4.45823	22.6745
ENSONIG00000001082	ENSONIG00000001082	ism2b	GL831143.1:5467866-5472122		0.169409	1.97755	0.887759	0.795877	4.12751	3.51939	0	0.0378009
ENSONIG00000001083	ENSONIG00000001083	znf385c	GL831149.1:2159670-2215846		12.631	2.4519	0.364124	3.43879	2.2802	0.427056	0.6709	0.0533467
ENSONIG00000001084	ENSONIG00000001084	sptlc2b	GL831143.1:5477225-5495861		15.2567	23.8599	36.393	17.4759	101.881	20.3746	5.06308	57.9597
ENSONIG00000001085	ENSONIG00000001085	gar1	GL831156.1:1568972-1574107		4.65485	8.80595	5.11705	8.84671	18.5997	19.0253	7.68852	21.4487
ENSONIG00000001086	ENSONIG00000001086	zgc:63568	GL831156.1:1574705-1580173		0.734442	8.03711	2.20519	1.57907	5.19501	14.9704	2.74568	4.6183
ENSONIG00000001087	ENSONIG00000001087	exoc3l2b	GL831203.1:322729-330187		2.9091	8.2409	29.582	2.98907	3.05251	0.310349	0.885943	3.85618
ENSONIG00000001088	ENSONIG00000001088	-	GL831153.1:3233801-3234256		4.56655	44.6524	9.61041	0	61.2343	2.38461	0	675.056
ENSONIG00000001089	ENSONIG00000001089	-	GL831153.1:3271110-3272058		6.51201	19.8092	41.5419	0	18.2179	17.7447	0	111.065
ENSONIG00000001090	ENSONIG00000001090	dhx58 (1 of 2)	GL831149.1:2316854-2328717		14.8448	6.64485	1.48882	0.396393	6.25779	0.476801	4.5238	11.1459
ENSONIG00000001091	ENSONIG00000001091	-	GL831153.1:3329276-3330091		0	26.8281	21.3494	0	7.05708	8.6212	0	57.3235
ENSONIG00000001092	ENSONIG00000001092	-	GL831153.1:3358503-3359194		0	0	0.186825	0	2.72373	0	0	0.628969
ENSONIG00000001093	ENSONIG00000001093	-	GL831153.1:3417943-3419284		6.3793	0	0.744712	0	0	0.717144	0	2.96135
ENSONIG00000001094	ENSONIG00000001094	-	GL831153.1:3437383-3451739		40.979	46.2628	132.633	24.9996	85.7379	50.0917	8.57253	734.997
ENSONIG00000001095	ENSONIG00000001095	si:dkey-52k20.13	GL831153.1:3458964-3461747		2.05359	11.5197	6.54245	1.17927	1.65166	14.5342	2.61463	11.7116
ENSONIG00000001096	ENSONIG00000001096	elavl1 (1 of 2)	GL831153.1:3469525-3472046		7.57832	8.03868	2.03676	1.67343	17.9762	0.923445	3.10236	29.3634
ENSONIG00000001097	ENSONIG00000001097	rnaset2l	GL831203.1:377780-409156		1.8716	3.02476	1.4202	0	0.379668	4.26636	1.357	17.4685
ENSONIG00000001098	ENSONIG00000001098	snw1	GL831143.1:5506366-5516111		33.4463	51.4804	11.9067	14.0341	48.8539	30.166	17.7357	59.4342
ENSONIG00000001099	ENSONIG00000001099	slc1a8b	GL831153.1:3477338-3485849		1.93749	4.16053	0.1329	0.466963	0.2075	0	0.251179	0.4688
ENSONIG00000001100	ENSONIG00000001100	supt5h	GL831203.1:377780-409156		28.4634	16.2745	6.71573	7.54251	26.8208	7.80065	10.8719	24.4931
ENSONIG00000001101	ENSONIG00000001101	dhx58 (2 of 2)	GL831149.1:2316854-2328717		13.5718	10.4459	4.5201	7.03735	2.2232	1.87488	25.7143	18.4396
ENSONIG00000001102	ENSONIG00000001102	kat2a	GL831149.1:2333444-2345017		2.04824	1.89002	0.84945	0.62098	11.3398	4.38505	1.17851	5.11779
ENSONIG00000001103	ENSONIG00000001103	desi2	GL831135.1:5541813-5552521		2.73721	14.7037	0.572707	1.77646	13.6035	3.66257	3.80695	9.84776
ENSONIG00000001104	ENSONIG00000001104	mtrf1l	GL831135.1:5570164-5576199		0.831067	1.1498	0.348769	0.523276	6.40155	5.70767	1.35731	2.24714
ENSONIG00000001105	ENSONIG00000001105	-	GL831156.1:1739085-1751208		17.146	3.0251	0	0.734669	0.534324	0.0214758	3.58707	0.0162818
ENSONIG00000001106	ENSONIG00000001106	nrxn3b	GL831143.1:5694122-5994785		8.77767	0.443724	0	1.6417	0.777958	1.47351	0.14873	0
ENSONIG00000001107	ENSONIG00000001107	-	GL831153.1:3489052-3490912		6.32452	0	0.866391	0	0	0.367592	0	50.965
ENSONIG00000001108	ENSONIG00000001108	zgc:101744	GL831153.1:3493058-3499926		4.91955	40.1113	39.5973	105.997	137.658	43.4494	205.321	79.2898
ENSONIG00000001109	ENSONIG00000001109	elovl6	GL831156.1:1770796-1789327		53.2846	9.23409	0.592332	65.0622	15.3532	7.22218	2.07591	2.51818
ENSONIG00000001110	ENSONIG00000001110	fbxo5	GL831135.1:5579829-5582209		0	0.705523	0.203581	0.864656	10.3671	9.0458	3.15078	20.1355
ENSONIG00000001111	ENSONIG00000001111	vip	GL831135.1:5596587-5602730		9.45906	1.37791	0.0542095	0.147239	0.993098	0	0	0.142724
ENSONIG00000001112	ENSONIG00000001112	egf	GL831156.1:1796933-1817668		0.247079	1.31108	0.130953	0.260795	0.0914578	0	0	0
ENSONIG00000001113	ENSONIG00000001113	rab5c (1 of 2)	GL831149.1:2346604-2352652		49.281	93.3039	37.9227	33.3576	17.4784	24.2472	31.5099	113.734
ENSONIG00000001114	ENSONIG00000001114	diras1b	GL831153.1:3512267-3513178		7.91423	0	0	0	0.36092	0	0	0
ENSONIG00000001115	ENSONIG00000001115	anapc1	GL831135.1:5625046-5680180		1.56074	0.869193	0.514516	0.339606	7.30965	8.08146	1.39689	4.50141
ENSONIG00000001116	ENSONIG00000001116	GADD45A	GL831153.1:3531475-3533937		18.7051	2.12071	2.36691	1.55126	5.37731	0.492171	0.886271	1.4653
ENSONIG00000001117	ENSONIG00000001117	KCNH4 (1 of 2)	GL831149.1:2359459-2371686		1.36337	0	0.0452566	0.317437	1.03281	0.0195479	0	0.040228
ENSONIG00000001118	ENSONIG00000001118	il15l	GL831203.1:414946-423194		0.607498	11.8876	1.90589	0.445977	0.743631	0.15825	9.30783	9.07991
ENSONIG00000001119	ENSONIG00000001119	GPR171	GL831203.1:543906-549836		0.885719	3.57546	1.10369	0.433847	16.4392	45.2967	3.09441	11.4834
ENSONIG00000001120	ENSONIG00000001120	zgc:153654	GL831153.1:3534381-3538598		0	0.26956	0.0986137	0	0	0.049906	0	0.0529356
ENSONIG00000001121	ENSONIG00000001121	-	GL831203.1:558805-569218		0	0	0.163857	0	0.0560467	0.120815	0	0.21312
ENSONIG00000001122	ENSONIG00000001122	P2RY14	GL831203.1:584029-585043		2.24792	1.11693	0.387672	0.33012	0.305884	0	0.712323	2.64584
ENSONIG00000001123	ENSONIG00000001123	SHKBP1	GL831203.1:605925-614342		2.46947	4.84114	1.05287	0.708685	9.9498	3.40264	2.29684	9.68837
ENSONIG00000001124	ENSONIG00000001124	lrit3a	GL831156.1:1824000-1830651		0	10.5741	0.0417508	0.226262	0	0	0.26089	0
ENSONIG00000001125	ENSONIG00000001125	MAP1S (1 of 2)	GL831153.1:3538807-3551561		22.0749	3.15793	0.53015	0.0820223	2.04882	0.818183	0.62888	1.1788
ENSONIG00000001126	ENSONIG00000001126	slc16a12a	GL831135.1:5859894-5873554		0.20102	1.17923	0.104962	0.778411	2.09	1.65543	0.526166	0.835215
ENSONIG00000001127	ENSONIG00000001127	gpm6aa	GL831156.1:1835455-1841307		480.446	11.6903	0.796147	0	5.05036	0.17197	0	1.87275
ENSONIG00000001128	ENSONIG00000001128	hcrt	GL831149.1:2373323-2375009		0.525282	0	0.0816589	0	0.19402	0	0	1.50728
ENSONIG00000001129	ENSONIG00000001129	si:ch211-210g13.5	GL831149.1:2377479-2441680		22.6032	2.51461	1.21351	1.5543	5.59708	0.243444	1.93951	17.2798
ENSONIG00000001130	ENSONIG00000001130	cart1 (1 of 2)	GL831153.1:3551620-3553093		40.6585	0.383299	0	0	0.192307	0	0	0
ENSONIG00000001131	ENSONIG00000001131	stat5.1	GL831149.1:2451929-2500927		3.76062	5.12063	3.28826	8.5377	7.76585	0.232633	28.6436	14.0594
ENSONIG00000001132	ENSONIG00000001132	ccdc94	GL831153.1:3554569-3558522		10.9665	13.0391	5.50753	5.17073	31.6663	47.1122	12.4267	14.3489
ENSONIG00000001133	ENSONIG00000001133	cep128	GL831143.1:6011238-6065760		1.04398	1.86047	0.434188	0.334974	16.1472	1.79118	0.670705	1.85471
ENSONIG00000001134	ENSONIG00000001134	esrrd	GL831203.1:617238-621517		0.203975	40.6515	0.0587126	0.592998	12.4923	0.37202	0	0.106459
ENSONIG00000001135	ENSONIG00000001135	shda	GL831153.1:3561602-3568187		8.61573	9.96386	2.67261	1.4256	13.985	32.742	13.6806	6.91602
ENSONIG00000001136	ENSONIG00000001136	SPATA4	GL831156.1:1863899-1867833		1.31229	0.601987	6.43323	0	53.3499	7.02385	0	0
ENSONIG00000001137	ENSONIG00000001137	pank1a	GL831135.1:5882439-5902479		0.79316	0.307432	0.125915	0.846266	3.00127	0.219041	0	1.2003
ENSONIG00000001138	ENSONIG00000001138	PPAP2C (1 of 2)	GL831153.1:3606781-3610510		2.32857	304.083	17.0638	16.2499	20.0904	7.69856	3.61508	49.3911
ENSONIG00000001139	ENSONIG00000001139	LTBP4	GL831203.1:624565-686508		0.13172	0.557242	0.191038	0.0672067	1.46734	0.0568178	0.218182	0.670034
ENSONIG00000001140	ENSONIG00000001140	spata4	GL831156.1:1868933-1875204		1.44234	42.5248	0.284635	0	3.32789	0	47.28	0.662105
ENSONIG00000001141	ENSONIG00000001141	-	GL831153.1:3613421-3622912		25.7686	21.7654	11.7686	10.4789	21.3825	5.24758	16.0554	64.0185
ENSONIG00000001142	ENSONIG00000001142	zgc:65997	GL831135.1:5906141-5908925		16.9467	13.6613	1.26965	0	13.7807	39.6224	3.26977	3.2576
ENSONIG00000001143	ENSONIG00000001143	tshr	GL831143.1:6066322-6111349		0.150916	0.90326	0.048916	0	1.46712	0.0490629	0.14262	0.31678
ENSONIG00000001144	ENSONIG00000001144	MAL (1 of 3)	GL831135.1:5929054-5935026		1.14386	2.24959	0.872137	0	0	0	0	0
ENSONIG00000001145	ENSONIG00000001145	mal	GL831135.1:5938092-5945363		0.144861	0	34.1912	0	0.129601	0	0.638357	0
ENSONIG00000001146	ENSONIG00000001146	ctso	GL831156.1:1875940-1885524		1.39998	5.3524	2.55224	9.52615	18.962	14.7651	17.6291	6.2112
ENSONIG00000001147	ENSONIG00000001147	gna11b	GL831153.1:3630418-3648913		1.70404	1.09321	0.451238	0	1.88815	1.28299	0	1.33286
ENSONIG00000001148	ENSONIG00000001148	stat3	GL831149.1:2508097-2520818		28.5976	103.071	27.3647	24.5942	34.607	3.52815	64.7841	110.294
ENSONIG00000001149	ENSONIG00000001149	tdo2b	GL831156.1:1886839-1891011		0.193595	0.324358	0.118598	314.8	0	0.0907712	0	0
ENSONIG00000001150	ENSONIG00000001150	mrps5	GL831135.1:5953609-5992118		20.3783	32.9295	8.09892	9.51224	18.8105	14.897	12.5589	26.8086
ENSONIG00000001151	ENSONIG00000001151	TENM3 (1 of 2)	GL831156.1:1894216-2019245		13.1533	0.505518	0.0920063	0	2.17329	0.0196206	0.0589424	0.0221728
ENSONIG00000001152	ENSONIG00000001152	-	GL831153.1:3651064-3654475		4.9767	1.94554	0.599314	0.564026	8.35181	4.394	6.51	2.21451
ENSONIG00000001153	ENSONIG00000001153	slc8a1b	GL831135.1:6171788-6287281		1.63383	0.215731	0.0409769	0	0.472576	0.0544333	0	0.523294
ENSONIG00000001154	ENSONIG00000001154	TPGS1	GL831153.1:3655325-3658538		4.87621	6.4876	0.810939	0	9.97644	1.42872	0.703144	0.423565
ENSONIG00000001155	ENSONIG00000001155	ISYNA1	GL831153.1:3660586-3666146		25.969	7.6713	35.3993	0.423718	12.9622	6.44285	1.46403	31.5019
ENSONIG00000001156	ENSONIG00000001156	gtf2a1	GL831143.1:6066322-6111349		5.35979	3.85654	1.31258	1.0069	12.4211	1.37038	1.88761	4.5386
ENSONIG00000001157	ENSONIG00000001157	pdcd10b	GL831153.1:3678798-3691779		67.1012	64.3257	22.6058	36.6752	176.812	56.5094	39.1635	88.7009
ENSONIG00000001158	ENSONIG00000001158	ches1	GL831143.1:6120787-6180431		9.35753	9.52829	0.97667	0.880803	5.42246	0.0993965	6.10991	1.57548
ENSONIG00000001159	ENSONIG00000001159	ILKAP	GL831203.1:687886-691661		7.08765	6.97685	1.80858	1.88465	12.9334	8.28002	5.21604	6.44978
ENSONIG00000001160	ENSONIG00000001160	si:ch73-211l2.1	GL831153.1:3806261-3808744		0.180005	1.3643	0.46483	0	0.144619	4.14642	0	2.21376
ENSONIG00000001161	ENSONIG00000001161	kcnk13b	GL831143.1:6285502-6296174		4.26883	0	0.0215854	0	0.436372	0.187792	0	0
ENSONIG00000001162	ENSONIG00000001162	slitrk3b	GL831153.1:3895258-3911308		11.3298	0.544798	0.00812522	0	3.08653	0.325575	0	0.00451451
ENSONIG00000001163	ENSONIG00000001163	psmc1b	GL831143.1:6304967-6314249		66.4747	57.2899	21.4121	26.1156	65.6405	46.2766	71.4493	94.4355
ENSONIG00000001164	ENSONIG00000001164	zgc:162872	GL831203.1:695084-705972		7.73143	5.44674	2.72579	3.00635	12.167	9.99595	6.15578	4.54862
ENSONIG00000001165	ENSONIG00000001165	thumpd2	GL831135.1:6321439-6328134		4.3111	2.03094	0.967579	0.574375	5.98412	4.93671	0.32344	1.79077
ENSONIG00000001166	ENSONIG00000001166	map4k3b	GL831135.1:6329441-6370095		2.12306	4.64536	0.470626	1.71958	8.81069	0.562003	0.381563	1.88913
ENSONIG00000001167	ENSONIG00000001167	NRD1 (1 of 2)	GL831153.1:3915325-3941240		5.70174	3.69851	0.78814	2.30846	18.1666	6.19703	17.1752	3.91971
ENSONIG00000001168	ENSONIG00000001168	calm3b (1 of 2)	GL831143.1:6322884-6329440		1037.16	130.032	69.3434	20.7501	161.359	20.372	362.338	395.16
ENSONIG00000001169	ENSONIG00000001169	brms1lb	GL831143.1:6359908-6368591		40.1976	15.6565	2.31817	3.92599	13.4326	12.263	7.02002	14.3259
ENSONIG00000001170	ENSONIG00000001170	wdr74	GL831203.1:708649-732994		3.09788	4.15916	1.48842	2.15655	11.6921	54.401	19.0621	5.98795
ENSONIG00000001171	ENSONIG00000001171	IWS1	GL831203.1:708649-732994		24.9111	23.5344	9.34096	8.82974	22.4655	9.62731	19.5531	20.8259
ENSONIG00000001172	ENSONIG00000001172	PSMA6 (1 of 2)	GL831143.1:6384621-6394900		8.7995	13.3517	5.93021	7.51172	26.1832	21.9392	17.6655	33.6909
ENSONIG00000001173	ENSONIG00000001173	aga	GL831156.1:2069636-2091234		3.70404	6.43875	3.33962	2.9814	4.77643	19.4168	3.30158	20.4371
ENSONIG00000001174	ENSONIG00000001174	gmnc	GL831203.1:756791-763321		0.213802	0	0.830817	0	0.23648	6.72931	1.0025	0
ENSONIG00000001175	ENSONIG00000001175	IL1RAP	GL831203.1:774901-797717		1.67336	12.6155	1.94267	2.70124	4.81241	2.05363	2.5195	5.9673
ENSONIG00000001176	ENSONIG00000001176	neil3	GL831156.1:2069636-2091234		1.70476	1.86854	0.584351	1.13187	8.34122	4.44299	5.50268	10.1976
ENSONIG00000001177	ENSONIG00000001177	ptrfa	GL831149.1:2521159-2537881		0.82438	117.782	0.678894	0.377663	2.74568	0.0863367	84.967	1.38265
ENSONIG00000001178	ENSONIG00000001178	nfkbiaa	GL831143.1:6384621-6394900		13.2504	38.8823	31.3182	46.0683	21.0992	35.602	33.7518	180.202
ENSONIG00000001179	ENSONIG00000001179	atp6v0a1a	GL831149.1:2540829-2555288		13.5087	34.5964	10.8994	11.4423	31.6388	52.7274	11.781	43.8595
ENSONIG00000001180	ENSONIG00000001180	ARHGEF33	GL831135.1:6375607-6394345		0.098953	0.247926	0.0619681	0	1.9275	0.0388003	0.450955	0
ENSONIG00000001181	ENSONIG00000001181	slc17a5	GL831135.1:6405874-6412479		9.90303	6.08	1.83622	5.22088	4.61471	13.3082	4.6823	8.59061
ENSONIG00000001182	ENSONIG00000001182	PDGFC	GL831156.1:2122504-2169082		0.689394	0.788224	0.26178	0.525844	5.62824	0.281238	3.26588	0
ENSONIG00000001183	ENSONIG00000001183	FAM177A1 (1 of 2)	GL831143.1:6417716-6420667		45.5998	6.44031	0.385928	0	29.6483	1.41164	0	0.853886
ENSONIG00000001184	ENSONIG00000001184	glrbb	GL831156.1:2179311-2203904		56.822	3.49105	0.0274982	0.148385	2.06927	0.0740664	0	0.0900221
ENSONIG00000001185	ENSONIG00000001185	-	GL831143.1:7091544-7096649		0	0	0	83.9165	0	0.0812041	0	0
ENSONIG00000001186	ENSONIG00000001186	-	GL831143.1:7108880-7113506		0	0	0	235.784	0	0.199264	0	0.0527485
ENSONIG00000001187	ENSONIG00000001187	EEF1A1 (1 of 2)	GL831135.1:6416565-6419357		179.388	15.4018	0.334313	0.207792	13.5417	2.38218	0.929778	0.121519
ENSONIG00000001188	ENSONIG00000001188	fgf12b	GL831203.1:811406-824841		9.47241	0	0.0920346	0	0.218357	0.121475	23.4338	0
ENSONIG00000001189	ENSONIG00000001189	zgc:153952	GL831149.1:2566027-2576292		3.32553	11.1006	3.98043	3.97702	3.43309	0.99809	1.07447	24.5986
ENSONIG00000001190	ENSONIG00000001190	-	GL831143.1:7114733-7116864		0.836363	3.4184	0.58898	18645.9	0.92456	4.27495	1.90646	0.102441
ENSONIG00000001191	ENSONIG00000001191	FAM163A (1 of 2)	GL831153.1:3960196-3965352		6.35008	0.125773	0	0	1.91195	0.571067	0	0.0930439
ENSONIG00000001192	ENSONIG00000001192	si:dkey-193b15.6	GL831153.1:3968253-3978197		0.210758	0	0	0	0	0.0882382	0	0
ENSONIG00000001193	ENSONIG00000001193	glur2b	GL831156.1:2213621-2259803		54.9131	0.351361	0	0	0.106635	0.0651203	0	0
ENSONIG00000001194	ENSONIG00000001194	hsd17b1	GL831149.1:2597294-2601271		0.812303	0	0.0447459	0	0.109778	5.24934	0	0.288678
ENSONIG00000001195	ENSONIG00000001195	ddx43	GL831135.1:6429581-6445478		2.4414	2.55505	1.22674	1.9488	99.4851	20.0086	3.51685	6.86704
ENSONIG00000001196	ENSONIG00000001196	ODF3L2 (1 of 2)	GL831153.1:3968253-3978197		0.0393322	0	0.078746	0	0.136332	0	0	0.149877
ENSONIG00000001197	ENSONIG00000001197	mb21d2a	GL831203.1:868680-874548		4.66509	2.94186	0.918924	0.823533	6.68178	1.19824	2.18458	1.97811
ENSONIG00000001198	ENSONIG00000001198	ebi3	GL831153.1:3968253-3978197		1.45717	0	0.549431	0	0	0	0	3.21272
ENSONIG00000001199	ENSONIG00000001199	glrx5	GL831143.1:7139925-7141491		25.1479	68.3478	17.2278	12.5099	22.2645	80.5698	22.4999	37.5542
ENSONIG00000001200	ENSONIG00000001200	si:ch73-141c7.1	GL831149.1:2601754-2606310		0.0835556	17.3746	5.99061	151.65	4.16003	146.061	6.87008	0
ENSONIG00000001201	ENSONIG00000001201	PARL (1 of 2)	GL831203.1:875690-880502		17.2108	37.3185	9.62518	15.0267	68.1787	39.7728	39.637	22.5537
ENSONIG00000001202	ENSONIG00000001202	ints9	GL831143.1:7144491-7150627		10.5492	10.2564	3.0457	4.49391	33.119	32.0341	5.79523	20.3685
ENSONIG00000001203	ENSONIG00000001203	im:7148400 (1 of 2)	GL831149.1:2613483-2627225		0.121608	0.0729466	0.360165	2.14651	1.01185	1.81858	0.166766	0.562357
ENSONIG00000001204	ENSONIG00000001204	crlf1a	GL831153.1:3981204-4001583		1.73957	8.60255	0.581355	0.631566	3.38971	0.0840232	1.12988	2.97729
ENSONIG00000001205	ENSONIG00000001205	keap1a	GL831153.1:4022200-4036307		2.25565	13.1654	20.0398	27.1916	1.21596	6.26784	3.9045	12.4405
ENSONIG00000001206	ENSONIG00000001206	ccdc43	GL831149.1:2650305-2654784		3.28948	12.7774	2.34326	1.60489	26.9005	23.7057	46.1809	25.2841
ENSONIG00000001207	ENSONIG00000001207	chp2	GL831203.1:885635-894830		1.66236	8.82866	2.26186	187.35	1.58517	0.45609	0.615172	121.317
ENSONIG00000001208	ENSONIG00000001208	dlc	GL831203.1:981603-998144		1.40626	3.35142	6.84823	7.80333	3.87946	1.9242	0.64033	19.0682
ENSONIG00000001209	ENSONIG00000001209	kcnq5a	GL831135.1:6448539-6476497		1.20671	0.12956	0.0710767	0	0.311768	0.66352	0.771853	0.0480951
ENSONIG00000001210	ENSONIG00000001210	c1ql3b	GL831149.1:2734112-2753041		22.0607	11.1928	0.0124146	0.135843	0.0610405	0	0.152284	0.0256125
ENSONIG00000001211	ENSONIG00000001211	ezh1	GL831149.1:2819450-2830588		63.432	42.4183	6.66412	3.71183	20.6299	0.414236	16.0286	15.9289
ENSONIG00000001212	ENSONIG00000001212	pla2g7	GL831143.1:7151932-7157899		5.71316	3.8538	2.80249	6.46579	12.436	22.411	4.24469	47.8465
ENSONIG00000001213	ENSONIG00000001213	cnrip1b	GL831135.1:6561339-6576861		21.9311	4.4914	0.22261	1.27792	0.63867	0	0	0
ENSONIG00000001214	ENSONIG00000001214	PPP3R1	GL831135.1:6605775-6631781		17.5102	6.19194	2.39124	1.41671	19.3521	9.19532	14.4751	7.58364
ENSONIG00000001215	ENSONIG00000001215	SSBP4 (1 of 2)	GL831153.1:4058730-4093010		4.46778	1.02519	1.20742	0.170642	2.06645	0.242084	0.787522	1.9458
ENSONIG00000001216	ENSONIG00000001216	timm50	GL831203.1:1010555-1048174		9.36905	20.5347	4.68432	4.81804	21.1111	70.6842	20.1837	19.2299
ENSONIG00000001217	ENSONIG00000001217	-	GL831156.1:2292596-2296055		0	5.87391	0	0	1.01475	0.0791069	0	0
ENSONIG00000001218	ENSONIG00000001218	tdrd6	GL831143.1:7172841-7177788		0	0.0726627	0	0.0731432	72.7531	2.27012	0.32355	0.0545611
ENSONIG00000001219	ENSONIG00000001219	sf3b14	GL831143.1:7196201-7201258		27.0679	44.6978	14.1581	19.826	91.4599	22.3967	24.8037	122.959
ENSONIG00000001220	ENSONIG00000001220	-	GL831203.1:1087000-1089239		0	1.05519	0	0	0	0	0	0
ENSONIG00000001221	ENSONIG00000001221	clip3	GL831203.1:1099262-1114073		37.6084	0.283925	0	0	6.16762	0.028638	0	0.64308
ENSONIG00000001222	ENSONIG00000001222	fam198b	GL831156.1:2360804-2369403		1.06069	7.77264	3.15717	2.06402	0.508928	0.711649	3.96516	3.93704
ENSONIG00000001223	ENSONIG00000001223	pno1	GL831135.1:6605775-6631781		116.227	481.252	111.473	290.019	255.749	105.66	360.729	640.227
ENSONIG00000001224	ENSONIG00000001224	tmem144b	GL831156.1:2369913-2379909		0.182034	0.17141	0	0.176808	0.16558	151.636	12.3102	0
ENSONIG00000001225	ENSONIG00000001225	vsnl1a	GL831143.1:7205479-7248564		466.222	9.32676	0.501002	0.698032	22.1247	0.371112	0	0
ENSONIG00000001226	ENSONIG00000001226	ELL (1 of 2)	GL831153.1:4106619-4115756		9.39721	7.67733	2.42009	8.83806	18.8019	47.5739	16.6303	11.0438
ENSONIG00000001227	ENSONIG00000001227	CNTNAP1	GL831149.1:2835146-2847315		4.47181	0.578521	0	0	0.32629	0	0	0
ENSONIG00000001228	ENSONIG00000001228	znf395	GL831143.1:7408184-7414461		20.1883	10.6808	3.91857	3.18051	16.3708	9.17723	11.0949	17.8955
ENSONIG00000001229	ENSONIG00000001229	si:ch211-137a8.4	GL831203.1:1249158-1249998		86.9388	11.2734	2.71178	0.433395	4.8593	33.4379	9.31028	0.057446
ENSONIG00000001230	ENSONIG00000001230	fbxo16	GL831143.1:7417114-7422409		0.363999	0	3.28452	0	5.02635	0.042612	0	0
ENSONIG00000001231	ENSONIG00000001231	TMEM87A	GL831203.1:1265094-1290384		14.9867	15.6077	6.30075	8.59085	15.0627	6.03422	6.76639	21.0425
ENSONIG00000001232	ENSONIG00000001232	d2hgdh	GL831153.1:4117841-4120280		13.697	19.7752	9.51245	6.15825	25.2378	33.7409	38.5568	17.0422
ENSONIG00000001233	ENSONIG00000001233	c1d	GL831135.1:6646281-6648163		15.5279	21.2529	6.23356	3.39435	60.1378	69.0884	21.847	30.0596
ENSONIG00000001234	ENSONIG00000001234	fzd3a	GL831143.1:7426179-7442522		10.406	1.77985	0.757641	0.130425	29.9283	1.63171	0.41852	0.319509
ENSONIG00000001235	ENSONIG00000001235	acvr1l	GL831153.1:4120404-4130416		31.0481	27.0139	9.87307	9.45198	29.8838	13.533	23.9761	22.345
ENSONIG00000001236	ENSONIG00000001236	meis1	GL831135.1:6871007-6941142		4.55591	13.5201	1.08128	4.11192	2.34151	1.54972	4.0193	2.4206
ENSONIG00000001237	ENSONIG00000001237	rxfp1	GL831156.1:2496381-2513309		0.242508	0	0.194813	0	1.08468	3.43952	0.48915	0.0437778
ENSONIG00000001238	ENSONIG00000001238	CDC42BPA	GL831143.1:7446216-7509362		5.70076	7.54562	2.18887	1.76926	15.4226	2.2094	3.0122	1.74429
ENSONIG00000001239	ENSONIG00000001239	-	GL831203.1:1292581-1302531		52.6903	88.9794	23.0565	6.88711	35.9049	21.1893	25.778	34.937
ENSONIG00000001240	ENSONIG00000001240	otomp	GL831153.1:4133757-4140984		0.271527	0.124732	0	0.121063	0.161923	0.240488	0.131535	0
ENSONIG00000001241	ENSONIG00000001241	hs6st1b	GL831153.1:4272856-4327460		23.324	36.7553	12.8523	17.1418	7.11897	1.44502	7.00877	10.0828
ENSONIG00000001242	ENSONIG00000001242	uggt1	GL831153.1:4339270-4370028		7.6619	7.75355	3.56343	4.67122	34.1841	6.7601	13.9385	20.5755
ENSONIG00000001243	ENSONIG00000001243	SPRED2 (1 of 2)	GL831135.1:7123877-7133876		3.36026	3.66373	1.51019	0.932477	2.18441	0	1.46659	3.69646
ENSONIG00000001244	ENSONIG00000001244	PLEKHH3	GL831149.1:2880872-2896794		3.73137	18.4854	4.1105	3.16663	3.98186	0.273987	2.5078	7.74306
ENSONIG00000001245	ENSONIG00000001245	actr2b	GL831135.1:7140215-7154755		46.9774	74.1863	40.06	20.4577	43.6822	8.57578	26.2044	226.891
ENSONIG00000001246	ENSONIG00000001246	tubg1	GL831149.1:2898832-2906852		27.7485	10.9395	3.43897	1.87196	64.8317	21.4179	12.8501	28.7577
ENSONIG00000001247	ENSONIG00000001247	etfdh	GL831156.1:2521504-2542530		16.9953	61.1491	21.5257	33.8545	27.6801	64.6935	24.3182	17.3224
ENSONIG00000001248	ENSONIG00000001248	lgalslb	GL831135.1:7187247-7191465		10.627	2.22883	0.674704	1.9737	5.26895	22.9945	3.55375	1.72712
ENSONIG00000001249	ENSONIG00000001249	zgc:101731	GL831203.1:1307626-1317245		0	0	0	0	4.72113	0.621441	0	0
ENSONIG00000001250	ENSONIG00000001250	PELI1 (1 of 2)	GL831135.1:7247602-7300602		7.44184	12.6456	9.09652	1.30052	8.22563	1.09083	6.57071	6.47627
ENSONIG00000001251	ENSONIG00000001251	fam134c	GL831149.1:2907457-2916084		18.6591	22.0914	13.2345	47.0565	16.4608	3.37614	21.4325	26.4909
ENSONIG00000001252	ENSONIG00000001252	NAIF1 (1 of 3)	GL831203.1:1322875-1329508		6.40341	3.9711	0.723593	0.535872	12.6436	14.4531	5.63414	2.12693
ENSONIG00000001253	ENSONIG00000001253	lft1	GL831143.1:7519047-7520878		0.967638	0.3283	0.494027	0	0.397005	0.140065	0	0
ENSONIG00000001254	ENSONIG00000001254	ugp2b	GL831135.1:7304177-7338493		15.3899	14.4377	12.0272	11.1984	10.4289	8.4482	8.61129	56.2798
ENSONIG00000001255	ENSONIG00000001255	ppid	GL831156.1:2543312-2549779		9.01675	3.665	2.84724	4.62047	41.7149	23.1847	38.6406	15.9986
ENSONIG00000001256	ENSONIG00000001256	LRFN3 (1 of 2)	GL831203.1:2210347-2256302		13.1488	0.56402	0.0508419	0	0.624873	0.0291269	0	0
ENSONIG00000001257	ENSONIG00000001257	psmc3ip	GL831149.1:2916233-2927393		4.2763	7.12271	2.55413	9.09248	15.6035	11.3693	7.32704	18.8931
ENSONIG00000001258	ENSONIG00000001258	-	GL831203.1:2289296-2292931		0	0	0.115201	0	0	0	0	1.14572
ENSONIG00000001259	ENSONIG00000001259	-	GL831203.1:2320991-2327277		0.111448	1.04964	1.41478	0.0976064	0.492678	0.103159	0.206713	44.4719
ENSONIG00000001260	ENSONIG00000001260	hnrnpub	GL831143.1:7524348-7534604		78.9917	49.9209	20.5364	11.7097	29.2674	21.539	24.8002	79.4692
ENSONIG00000001261	ENSONIG00000001261	wu:fd14a06	GL831203.1:2349359-2443582		0.13238	0.508963	0.338158	0.231087	29.0886	0.0574549	0.260533	14.6673
ENSONIG00000001262	ENSONIG00000001262	sp3a (1 of 2)	GL831153.1:4371562-4377569		7.86071	11.7302	3.37086	1.41817	11.5781	6.02934	2.13092	14.2825
ENSONIG00000001263	ENSONIG00000001263	rps3	GL831203.1:2453754-2460189		677.616	2500.28	579.031	2821.52	920.786	259.35	1533.06	2877.12
ENSONIG00000001264	ENSONIG00000001264	MDH1 (1 of 2)	GL831135.1:7341365-7346499		7.58804	300.777	22.8356	3.60804	40.1906	138.073	327.41	2.50123
ENSONIG00000001265	ENSONIG00000001265	ola1	GL831153.1:4380961-4389343		29.287	22.0985	6.86175	18.3173	25.5674	42.1146	38.8804	51.206
ENSONIG00000001266	ENSONIG00000001266	rapgef2	GL831156.1:2560496-2665781		8.50792	4.23102	1.34375	0.709833	4.5589	1.33913	3.02983	8.01198
ENSONIG00000001267	ENSONIG00000001267	mlx	GL831149.1:2916233-2927393		13.3526	14.9842	4.54308	6.62584	7.65573	7.3853	11.2261	20.8612
ENSONIG00000001268	ENSONIG00000001268	KCTD14	GL831203.1:2461144-2466094		0	0	2.02789	0.530201	0.832952	30.8566	2.67182	0
ENSONIG00000001269	ENSONIG00000001269	kif26bb	GL831143.1:7542409-7572703		3.2065	0.109719	0.0270857	0.0346352	2.13274	0.141621	5.32777	0.0240545
ENSONIG00000001270	ENSONIG00000001270	hm:zeh0619	GL831203.1:2469239-2472885		0	1.54277	0.367367	0	0.438678	0.0393164	0	1.57305
ENSONIG00000001271	ENSONIG00000001271	wdpcp	GL831135.1:7371501-7434799		1.22071	0.586413	0.829454	0	3.61797	3.25792	0.776065	0.266563
ENSONIG00000001272	ENSONIG00000001272	INTS4	GL831203.1:2473531-2483648		6.39821	5.21557	2.44004	2.05652	23.2363	6.57772	3.17703	11.8944
ENSONIG00000001273	ENSONIG00000001273	fmnl1a	GL831149.1:2928907-2941149		3.83861	10.1034	6.89937	2.04987	2.78615	0.447884	0.79272	66.4923
ENSONIG00000001274	ENSONIG00000001274	tra2b	GL831153.1:4380961-4389343		46.1891	52.9516	17.066	13.7496	50.9553	3.84199	26.2973	84.0352
ENSONIG00000001275	ENSONIG00000001275	cnstb	GL831143.1:7574118-7595267		9.87109	1.84923	0.550808	0.599432	2.80563	0.187974	1.77405	1.62088
ENSONIG00000001276	ENSONIG00000001276	SNAP25 (1 of 2)	GL831143.1:7616394-7652600		1798.7	25.6339	0.398809	2.08406	4.5504	0.40097	1.18081	0.284663
ENSONIG00000001277	ENSONIG00000001277	pcnt	GL831153.1:4403308-4437597		4.20069	2.667	1.14967	0.960823	9.37985	8.29803	2.14801	10.0136
ENSONIG00000001278	ENSONIG00000001278	otx1b	GL831135.1:7440096-7444135		8.31067	1.34326	0	0	0.884462	5.0621	1.24166	0.0188413
ENSONIG00000001279	ENSONIG00000001279	SRCIN1 (1 of 2)	GL831149.1:2947280-2987565		0.416156	0	0	0.0981385	1.02918	0.0879443	0	0
ENSONIG00000001280	ENSONIG00000001280	aamdc	GL831203.1:2484646-2485484		28.3378	132.118	26.7526	89.1967	62.7426	4.43139	285.673	19.9794
ENSONIG00000001281	ENSONIG00000001281	ehbp1	GL831135.1:7451305-7608504		3.57535	1.40385	1.29397	1.17016	6.05888	0.67197	1.40213	1.74903
ENSONIG00000001282	ENSONIG00000001282	ankef1a	GL831143.1:7689762-7701874		0.436903	1.41614	1.8157	0.214223	22.2821	0.775549	0.234198	0.748017
ENSONIG00000001283	ENSONIG00000001283	eif3k	GL831203.1:2508928-2514410		37.9505	90.4521	36.1704	80.0725	60.2525	27.5212	91.4873	202.08
ENSONIG00000001284	ENSONIG00000001284	CAPN12 (1 of 2)	GL831203.1:2516304-2537596		0.0870747	0.398252	1.4539	0.21375	1.99339	0.0723703	0.809258	7.22483
ENSONIG00000001285	ENSONIG00000001285	atg9a	GL831153.1:4441418-4451821		27.2175	15.6064	5.70135	5.91144	11.7783	1.53655	8.75093	8.91208
ENSONIG00000001286	ENSONIG00000001286	-	GL831149.1:3063534-3072451		63.4168	42.1177	20.2444	22.803	34.1779	63.2039	28.2729	152.255
ENSONIG00000001287	ENSONIG00000001287	fstl5	GL831156.1:2821157-2935520		22.0481	10.6397	0.0223367	0.113079	1.06899	0.248573	0.129774	0
ENSONIG00000001288	ENSONIG00000001288	wnt9b	GL831149.1:3074404-3080582		0.333958	3.55782	8.69963	0	0.258612	1.05889	0	0.0678411
ENSONIG00000001289	ENSONIG00000001289	-	GL831135.1:7796263-7884553		2.90695	0.727548	0.085766	0.0710508	0.223246	0.0632786	0.281447	0.0367468
ENSONIG00000001290	ENSONIG00000001290	emilin1a	GL831143.1:7706713-7735563		0.870925	5.13138	4.97327	2.18774	4.6374	0.433064	0.443395	5.85821
ENSONIG00000001291	ENSONIG00000001291	gosr2	GL831149.1:3090561-3094576		12.1015	18.2569	6.7698	12.6946	25.031	37.9982	20.6811	25.9135
ENSONIG00000001292	ENSONIG00000001292	gpatch8	GL831149.1:3096890-3123837		80.1489	129.449	20.1058	40.953	46.051	4.21578	36.9306	70.0417
ENSONIG00000001293	ENSONIG00000001293	stmn4	GL831143.1:7789287-7793686		538.809	0.921454	0.137728	0.819107	0	0	0	0.67648
ENSONIG00000001294	ENSONIG00000001294	il17a/f3	GL831143.1:7795945-7799447		0.476013	0.418075	0.75844	0	1.46244	0.549335	0	1.02963
ENSONIG00000001295	ENSONIG00000001295	mcm3	GL831143.1:7802373-7809726		4.20747	8.37504	4.02402	2.54999	71.6882	103.457	10.4582	74.2941
ENSONIG00000001296	ENSONIG00000001296	qdpra	GL831156.1:3059977-3071342		43.0971	27.9774	36.9335	374.936	55.4533	48.1373	40.0939	13.506
ENSONIG00000001297	ENSONIG00000001297	MAP3K14	GL831149.1:3135027-3153607		6.39734	14.8787	6.68054	2.80477	12.9	3.12117	4.88991	43.5137
ENSONIG00000001298	ENSONIG00000001298	myo10l1	GL831153.1:4470838-4507985		17.9145	0.480351	0.112879	0.0277861	0.554219	0.0341621	0.0308179	0.0143005
ENSONIG00000001299	ENSONIG00000001299	baxa	GL831149.1:3135027-3153607		47.7327	60.8457	20.165	15.8338	131.229	81.0705	30.7424	44.5203
ENSONIG00000001300	ENSONIG00000001300	rps11	GL831149.1:3135027-3153607		379.045	1177.08	461.5	1881.93	463.734	178.36	916.445	3259.67
ENSONIG00000001301	ENSONIG00000001301	ldb2a	GL831156.1:3164913-3199725		13.4772	28.4604	3.15956	1.35596	3.72182	0.568105	1.62726	4.57559
ENSONIG00000001302	ENSONIG00000001302	TAPT1 (1 of 2)	GL831156.1:3203486-3225813		3.78945	3.79799	0.997354	0.4995	14.096	0.771269	2.58087	6.14072
ENSONIG00000001303	ENSONIG00000001303	znf395b	GL831143.1:7826454-7852728		10.6755	14.733	1.43998	1.15857	9.82808	2.32202	5.7783	0.463871
ENSONIG00000001304	ENSONIG00000001304	lfng	GL831149.1:3189850-3199658		14.1642	7.32094	2.88512	3.18079	2.54791	1.15795	1.35117	1.26884
ENSONIG00000001305	ENSONIG00000001305	pnocb	GL831143.1:7826454-7852728		1.78191	1.10647	0	0	0	0.13605	0.594723	0.0898075
ENSONIG00000001306	ENSONIG00000001306	si:ch211-63o20.7	GL831143.1:7875024-7884102		4.43936	4.45578	0.840977	0.959877	11.6742	12.6553	2.25755	10.6055
ENSONIG00000001307	ENSONIG00000001307	elp3	GL831143.1:7889607-7942559		9.2379	5.56372	2.64425	2.31323	21.0084	13.0425	12.1394	9.60773
ENSONIG00000001308	ENSONIG00000001308	prom1a	GL831156.1:3232299-3316030		2.69728	8.45538	0.203993	0.210617	8.11687	0.027017	0.364415	1.67161
ENSONIG00000001309	ENSONIG00000001309	ttyh3a	GL831149.1:3211575-3237661		32.6616	17.7751	6.41611	2.74932	10.7468	1.23601	6.61499	31.8614
ENSONIG00000001310	ENSONIG00000001310	fam96b	GL831135.1:7935053-7937096		21.0645	23.6287	6.69555	10.1621	11.6874	9.67735	17.9197	16.2582
ENSONIG00000001311	ENSONIG00000001311	kif13bb	GL831143.1:7889607-7942559		1.0946	3.59565	1.8617	0.944596	6.51735	10.499	14.8735	2.57334
ENSONIG00000001312	ENSONIG00000001312	sumo3b	GL831153.1:4520488-4521874		158.612	24.2929	5.07077	49.05	94.4009	25.9781	0	26.3741
ENSONIG00000001313	ENSONIG00000001313	wipf1	GL831135.1:7940667-7966285		6.9544	24.6745	9.00662	2.60556	5.85684	2.89782	8.12338	87.993
ENSONIG00000001314	ENSONIG00000001314	snx8a	GL831149.1:3238519-3254507		1.94725	9.46132	4.27443	1.14053	3.2825	7.67182	2.5399	19.6856
ENSONIG00000001315	ENSONIG00000001315	tspeara	GL831153.1:4525660-4532448		0.122708	0.677691	0.0391961	0	0.0968164	0	0	0
ENSONIG00000001316	ENSONIG00000001316	ACTN4	GL831203.1:2542676-2601710		38.3083	28.4698	41.2586	21.373	16.0658	10.1348	7.4733	65.1417
ENSONIG00000001317	ENSONIG00000001317	gpr155b	GL831135.1:7967187-7975491		1.95121	0.788217	0.0546701	0	1.37619	3.38099	5.35432	0.91876
ENSONIG00000001318	ENSONIG00000001318	usp40	GL831153.1:4533401-4547454		4.54373	4.58965	2.04842	2.66685	6.48547	1.12787	1.42472	6.68462
ENSONIG00000001319	ENSONIG00000001319	nudt1	GL831149.1:3238519-3254507		1.99519	11.4126	5.11115	2.31258	13.0335	7.1644	4.03204	21.7878
ENSONIG00000001320	ENSONIG00000001320	tmem41ab	GL831135.1:7982605-7987795		0	0.66343	0	0	0.801608	0	60.601	0
ENSONIG00000001321	ENSONIG00000001321	FTSJ2	GL831149.1:3255704-3260009		2.92793	2.73719	0.342445	0.743553	8.28737	22.0869	1.99339	2.11815
ENSONIG00000001322	ENSONIG00000001322	psmg3	GL831149.1:3480884-3485603		5.00033	1.76235	1.17567	0.20575	13.3724	13.1206	10.7973	20.6285
ENSONIG00000001323	ENSONIG00000001323	tmem184a	GL831149.1:3486942-3505073		0.969178	3.09039	3.94964	5.60207	8.518	14.1954	2.30874	15.2001
ENSONIG00000001324	ENSONIG00000001324	cdh5	GL831135.1:8054040-8073365		1.08585	16.8825	1.21326	0.782977	2.19208	0.134617	1.31176	7.61939
ENSONIG00000001325	ENSONIG00000001325	fgfbp2a	GL831156.1:3322292-3324367		1.72429	0	0	0	0	0.194053	0	0
ENSONIG00000001326	ENSONIG00000001326	fabp7a	GL831153.1:4548630-4550235		109.462	11.2046	0.135236	9.02861	36.2787	0.453631	3.01253	0.854544
ENSONIG00000001327	ENSONIG00000001327	anxa5a	GL831156.1:3333324-3351928		0	0	0.160856	0	0	0	0	0
ENSONIG00000001328	ENSONIG00000001328	hmbox1b	GL831143.1:7952980-7974617		1.81429	0.364366	0.569358	0	4.70441	0.736383	0.168902	1.11595
ENSONIG00000001329	ENSONIG00000001329	mafk	GL831149.1:3510414-3517232		1.37797	10.1105	1.09837	0	1.55861	7.32873	6.2231	3.80071
ENSONIG00000001330	ENSONIG00000001330	disp1	GL831143.1:8036775-8079517		4.0071	2.55111	1.52082	4.56684	3.97451	6.18933	3.17502	1.49991
ENSONIG00000001331	ENSONIG00000001331	ints1	GL831149.1:3522492-3540310		5.1031	5.81943	1.70356	1.99234	26.9918	1.60217	2.20847	11.1294
ENSONIG00000001332	ENSONIG00000001332	mtx2	GL831135.1:8122247-8127962		27.3407	34.1416	10.6623	12.9308	14.7753	49.0967	14.7786	38.1065
ENSONIG00000001333	ENSONIG00000001333	TLR5 (1 of 2)	GL831143.1:8096489-8123594		0.529833	0.997014	1.21441	3.36275	0.538054	0.279909	0.327741	22.7442
ENSONIG00000001334	ENSONIG00000001334	-	GL831153.1:4570274-4572177		5.03145	6.24378	1.22308	0.944839	2.83551	0.206729	5.0739	3.60204
ENSONIG00000001335	ENSONIG00000001335	fyna	GL831153.1:4590428-4599386		24.119	1.29178	0.306619	0	11.2062	0.669611	2.42817	0.173941
ENSONIG00000001336	ENSONIG00000001336	brox	GL831143.1:8269624-8284566		38.9292	29.5973	12.0731	7.27163	30.9774	8.31485	7.81485	21.6951
ENSONIG00000001337	ENSONIG00000001337	-	GL831203.1:2614486-2621420		0	1.12887	0.0493867	0	0.799505	0.124828	0	0.290604
ENSONIG00000001338	ENSONIG00000001338	CCNA2	GL831156.1:3361896-3366311		0.765399	3.99073	1.20521	1.21943	29.9106	456.313	73.6013	66.7437
ENSONIG00000001339	ENSONIG00000001339	marcksb	GL831153.1:4612140-4614926		70.3443	1.7371	0.322168	0	3.90638	51.1461	10.7406	0.11528
ENSONIG00000001340	ENSONIG00000001340	col10a1	GL831153.1:4619934-4625155		0	0.862848	0.0968275	0.13786	2.33889	0.207687	0.217136	0.0574928
ENSONIG00000001341	ENSONIG00000001341	-	GL831135.1:8132811-8134214		0	0	1.60053	0	0.740274	0	0.631782	0.569758
ENSONIG00000001342	ENSONIG00000001342	si:ch211-266g18.9	GL831153.1:4644454-4649142		0.574943	3.647	1.52865	0.125804	0.164495	0	0.543344	2.7176
ENSONIG00000001343	ENSONIG00000001343	-	GL831135.1:8150584-8154870		0.540325	0	0.0389986	0	0.779625	0	0	0.0593473
ENSONIG00000001344	ENSONIG00000001344	mep1a.1	GL831143.1:8290815-8320674		0.988003	0	12.7198	0	0.127647	0.0434465	0	0
ENSONIG00000001345	ENSONIG00000001345	slc8a2b	GL831203.1:2796217-2839993		11.6832	0.267276	0	0	1.90331	0	0	0
ENSONIG00000001346	ENSONIG00000001346	lnpb	GL831135.1:8175061-8183782		12.8347	10.6873	1.53953	1.7401	34.898	1.56659	36.1154	12.3509
ENSONIG00000001347	ENSONIG00000001347	fhl5	GL831153.1:4649671-4652105		2.47718	0.294024	0.049447	0	0.119478	0	0.304064	3.43451
ENSONIG00000001348	ENSONIG00000001348	si:dkey-43p13.5	GL831149.1:3547804-3551917		0.131319	0.376288	0.0220944	0.1233	0.341356	0.52507	0.290478	0.10824
ENSONIG00000001349	ENSONIG00000001349	micall2a	GL831149.1:3551986-3564832		0.168822	3.37829	0.813159	1.07131	0.264951	2.74823	1.73596	1.11342
ENSONIG00000001350	ENSONIG00000001350	-	GL831143.1:8330057-8333365		0	0.268253	23.0423	0	0.228097	0.196092	0	0
ENSONIG00000001351	ENSONIG00000001351	manea	GL831153.1:4672677-4675833		9.04135	6.13828	4.08628	11.6137	13.577	5.61504	2.21609	5.58862
ENSONIG00000001352	ENSONIG00000001352	uncx	GL831149.1:3638261-3645832		1.6294	0	0	0	0.0224403	0.0125303	0	0
ENSONIG00000001353	ENSONIG00000001353	chrna1 (1 of 2)	GL831135.1:8188261-8196382		0	0.330978	0	0	1.56348	0	105.784	0.056748
ENSONIG00000001354	ENSONIG00000001354	bbs7	GL831156.1:3369307-3376177		5.05003	3.72981	1.69282	0.215304	44.176	1.84228	0.713799	0.477982
ENSONIG00000001355	ENSONIG00000001355	zfand2a	GL831149.1:3656159-3662538		10.4388	20.6938	7.73369	15.5979	20.7731	111.243	14.2631	25.1337
ENSONIG00000001356	ENSONIG00000001356	ppp1cb (1 of 2)	GL831153.1:4681057-4692038		148.382	40.5247	17.385	22.4679	58.5216	4.33444	14.4977	35.0134
ENSONIG00000001357	ENSONIG00000001357	-	GL831203.1:2863435-2866240		0.101059	0.87883	0.123824	0.165199	0.620491	0.0436532	2.91706	0.899627
ENSONIG00000001358	ENSONIG00000001358	ypel5 (1 of 2)	GL831153.1:4711966-4712452		91.0461	8.35431	7.48524	10.1181	10.2941	5.34981	7.00949	11.367
ENSONIG00000001359	ENSONIG00000001359	si:ch73-52e11.1	GL831149.1:3677396-3687747		13.165	0.160854	0	0	0.368871	0	0	0
ENSONIG00000001360	ENSONIG00000001360	srsf7a	GL831203.1:2876137-2888252		154.472	151.552	47.7855	62.1698	177.376	88.7798	192.294	245.421
ENSONIG00000001361	ENSONIG00000001361	LCLAT1	GL831153.1:4718304-4733806		6.97953	6.27763	5.62918	3.55394	9.5455	1.02543	11.484	7.7372
ENSONIG00000001362	ENSONIG00000001362	axin1	GL831149.1:3699223-3720676		5.9694	2.65843	1.57553	0.995386	5.9373	0.917663	0.633478	0.142167
ENSONIG00000001363	ENSONIG00000001363	tmem33	GL831156.1:3376827-3382276		45.8818	23.1692	11.4845	13.8701	34.5319	23.884	12.5699	54.4028
ENSONIG00000001364	ENSONIG00000001364	cdh11	GL831135.1:8295087-8345098		15.4337	2.40901	4.74288	0.245164	3.21815	0.0789828	0.892429	11.6968
ENSONIG00000001365	ENSONIG00000001365	LBH	GL831153.1:4738949-4748514		27.1346	176.683	38.0632	1.53483	8.22553	108.519	17.4475	55.6043
ENSONIG00000001366	ENSONIG00000001366	bmp4	GL831153.1:4801392-4807027		2.48976	21.8739	1.35195	2.84975	4.10418	0.5151	1.56811	2.41486
ENSONIG00000001367	ENSONIG00000001367	ddhd1a	GL831153.1:4864272-4886312		6.14669	2.7422	1.58681	0.364523	14.3869	2.82659	1.02105	6.82657
ENSONIG00000001368	ENSONIG00000001368	PLA2G10	GL831149.1:3735546-3740220		0.212154	27.6964	1.76164	0	1.26629	0.126427	0	0.556006
ENSONIG00000001369	ENSONIG00000001369	phox2bb	GL831156.1:3425740-3429260		0.46492	0.455937	0.0842045	0	0.65459	0.0567313	0.131129	0.137687
ENSONIG00000001370	ENSONIG00000001370	VSTM5	GL831203.1:2918390-2925487		0	0	0.342323	0	0.752658	0	0	0.137648
ENSONIG00000001371	ENSONIG00000001371	limch1b	GL831156.1:3432474-3517322		3.96969	7.99906	2.54876	1.834	2.30452	0.397766	1.16023	0.317177
ENSONIG00000001372	ENSONIG00000001372	MED17	GL831203.1:2927185-2937010		9.79704	7.8141	2.81788	1.56186	3.45963	10.1674	3.19854	10.4366
ENSONIG00000001373	ENSONIG00000001373	zc3h7a	GL831149.1:3745926-3768933		9.39125	14.911	5.4079	6.14599	45.3568	48.1677	11.0091	35.8195
ENSONIG00000001374	ENSONIG00000001374	fermt2	GL831153.1:4887976-4926140		3.15995	31.4973	11.887	5.48921	10.5303	0.379691	11.6166	3.22724
ENSONIG00000001375	ENSONIG00000001375	-	GL831203.1:2989283-2997328		0	0	0.0309321	0	0.239609	0.624633	0.195363	0
ENSONIG00000001376	ENSONIG00000001376	gon4l	GL831385.1:3546-21034		14.5711	10.2734	4.30044	7.04756	14.7483	2.04829	7.84198	9.96838
ENSONIG00000001377	ENSONIG00000001377	lbx2	GL831156.1:3776452-3779706		0	0	0	0	0.361743	0.0348546	7.00955	0
ENSONIG00000001378	ENSONIG00000001378	pcgf1	GL831156.1:3783742-3793720		7.0364	7.68453	1.59665	2.33435	53.6876	68.9733	6.37474	15.686
ENSONIG00000001379	ENSONIG00000001379	mcm8	GL831135.1:9045408-9053296		0.86494	2.30161	0.635726	0.647501	17.6298	11.9205	2.07115	5.20445
ENSONIG00000001380	ENSONIG00000001380	RMI2	GL831149.1:3745926-3768933		0.88887	3.41931	0.474631	0.550025	9.69257	29.6662	1.64617	8.6776
ENSONIG00000001381	ENSONIG00000001381	ubfd1	GL831149.1:3770377-3774185		16.7626	26.6637	7.44001	16.5683	88.6669	37.5112	44.7606	33.5566
ENSONIG00000001382	ENSONIG00000001382	-	GL831385.1:37331-39042		0	0	0.10328	0	0.133594	0	0	0.171478
ENSONIG00000001383	ENSONIG00000001383	tmem79b	GL831385.1:66805-69823		1.6091	1.29264	12.7931	9.77006	9.16645	41.0585	3.35265	0.186332
ENSONIG00000001384	ENSONIG00000001384	ARHGEF2 (1 of 2)	GL831385.1:79140-109578		12.4754	8.55471	6.48739	1.68758	4.74475	0.733196	1.66063	29.5634
ENSONIG00000001385	ENSONIG00000001385	fgf24	GL831156.1:3849206-3862099		1.05051	2.16971	0.122856	0	2.05299	0.1388	0	0.688914
ENSONIG00000001386	ENSONIG00000001386	kdm8	GL831149.1:3795310-3799979		3.46536	6.43584	1.03941	2.31365	16.8718	12.9402	3.90565	15.9942
ENSONIG00000001387	ENSONIG00000001387	GJD2	GL831153.1:5090161-5095398		11.2239	4.6744	0.0276803	0.0732766	0.0365095	0	0	0
ENSONIG00000001388	ENSONIG00000001388	hs3st4	GL831149.1:3937744-4024269		7.21216	0.728498	0.0144899	0	0.035911	0.0212689	0	0.0177848
ENSONIG00000001389	ENSONIG00000001389	ACTC1 (2 of 5)	GL831153.1:5096196-5100931		0.274964	22.7375	0.459914	0	0.583724	0.354647	22.1466	20.9017
ENSONIG00000001390	ENSONIG00000001390	hs3st2	GL831149.1:4083503-4115191		9.08169	0.371297	0	0	0.751433	0	0	0
ENSONIG00000001391	ENSONIG00000001391	PLCB1 (2 of 2)	GL831135.1:9073227-9104048		15.4687	0	0	0	1.06276	0	0	0
ENSONIG00000001392	ENSONIG00000001392	USP31 (1 of 2)	GL831149.1:4155718-4168531		0.0361837	0.0631907	0.0231091	0.0602028	0.729911	1.93803	0.137221	0.807548
ENSONIG00000001393	ENSONIG00000001393	ZCCHC3	GL831203.1:2997400-3002441		0	0	0	0	0	0	0.64366	0
ENSONIG00000001394	ENSONIG00000001394	fam222bb	GL831203.1:3100193-3106597		2.0948	0.983786	0.405107	1.10993	4.80924	4.24333	1.59089	1.9842
ENSONIG00000001395	ENSONIG00000001395	aqr	GL831153.1:5112979-5159291		4.42421	5.88604	2.72343	2.076	25.9778	7.36353	3.35994	28.6564
ENSONIG00000001396	ENSONIG00000001396	flot2b	GL831203.1:3109459-3121985		24.7139	5.75313	4.76955	1.41072	44.426	1.14365	4.00005	1.96728
ENSONIG00000001397	ENSONIG00000001397	npm1b	GL831156.1:3887031-3901385		2.31978	2.65942	0.146671	1.6937	8.70671	1.34301	4.65774	7.30265
ENSONIG00000001398	ENSONIG00000001398	-	GL831385.1:121528-128621		32.4696	48.9323	24.5591	26.2034	23.4339	41.7523	14.3866	93.4211
ENSONIG00000001399	ENSONIG00000001399	baiap3	GL831149.1:4200918-4222157		17.5595	0.314836	0	0.0454784	4.38867	0.0260617	0.782483	0.0113884
ENSONIG00000001400	ENSONIG00000001400	dph6	GL831153.1:5163337-5222088		4.64699	1.73949	0.499676	0.6984	4.03953	3.09591	1.38484	3.10764
ENSONIG00000001401	ENSONIG00000001401	myo7aa	GL831203.1:3175839-3213168		0.432551	1.45474	0.056161	0.0683045	1.83177	9.60664	1.11151	0.573394
ENSONIG00000001402	ENSONIG00000001402	tlx2	GL831156.1:3907278-3918084		0	0	0.267113	0	0.0675091	0	0	0.158572
ENSONIG00000001403	ENSONIG00000001403	meis2a	GL831153.1:5378193-5453549		32.0161	12.7938	3.09676	0	16.2419	0.204783	3.33563	4.68257
ENSONIG00000001404	ENSONIG00000001404	pmvk	GL831385.1:130019-131936		22.6943	12.0777	5.62979	66.1181	11.3842	16.5839	8.44328	17.9077
ENSONIG00000001405	ENSONIG00000001405	ADAD1	GL831156.1:3991618-4007668		0	8.04928	0	0.494159	82.1185	44.0284	4.1734	0
ENSONIG00000001406	ENSONIG00000001406	-	GL831156.1:4035921-4038795		0	0	0	0	0	0	0	0.304053
ENSONIG00000001407	ENSONIG00000001407	decr1	GL831385.1:132208-138363		27.978	353.987	87.8979	230.364	35.5419	31.121	92.6505	45.7441
ENSONIG00000001408	ENSONIG00000001408	-	GL831385.1:234122-277932		0.0984629	0.199811	126.537	0.374545	0	0	0.585718	0.405546
ENSONIG00000001409	ENSONIG00000001409	cetn4	GL831156.1:4050384-4054289		12.6186	14.4378	37.5736	7.99743	120.004	33.997	6.38138	17.7473
ENSONIG00000001410	ENSONIG00000001410	IQGAP3	GL831385.1:377197-400945		0.223298	1.18427	0.656602	0.365701	13.9972	3.21788	0.563839	5.7994
ENSONIG00000001411	ENSONIG00000001411	UNKL	GL831149.1:4282778-4295338		0.957245	1.69595	0.604751	0.6873	7.03071	0.603196	0.513744	3.97686
ENSONIG00000001412	ENSONIG00000001412	spred1	GL831153.1:5580936-5612002		7.19789	1.37992	0.909896	0.205232	5.14376	0.933175	0.679671	2.07843
ENSONIG00000001413	ENSONIG00000001413	napba	GL831135.1:9112625-9122799		480.382	9.91464	0.145083	0.806144	7.92908	0.209125	0.963192	0.118421
ENSONIG00000001414	ENSONIG00000001414	fgf2	GL831156.1:4062108-4207716		0	16.0505	12.8373	3.11	1.51026	0.419969	3.6393	4.08205
ENSONIG00000001415	ENSONIG00000001415	fam98b	GL831153.1:5619873-5641038		9.53542	3.77985	0.854891	0.788	16.3477	18.1822	4.65246	4.71843
ENSONIG00000001416	ENSONIG00000001416	nudt6	GL831156.1:4062108-4207716		3.10531	15.9064	9.9537	1.0805	1.67305	0.455849	3.93806	18.4348
ENSONIG00000001417	ENSONIG00000001417	shisa9b	GL831149.1:4326794-4349618		6.87694	0	0.453088	2.60884	0	0	0.199998	0
ENSONIG00000001418	ENSONIG00000001418	ptpn21	GL831153.1:5619873-5641038		4.62587	11.0802	2.02251	5.44272	13.8646	11.4055	9.96792	3.7795
ENSONIG00000001419	ENSONIG00000001419	mkl2b	GL831149.1:4383777-4392200		1.28753	4.43801	1.63598	0.0796919	3.00946	0.075358	2.18116	0.19942
ENSONIG00000001420	ENSONIG00000001420	cdc5l	GL831135.1:9128672-9148981		9.39832	10.5505	3.65477	3.91229	21.8622	11.3989	8.46048	12.9511
ENSONIG00000001421	ENSONIG00000001421	SPATA5	GL831156.1:4062108-4207716		8.09818	23.2504	8.31278	4.26877	8.37455	4.37976	16.0348	6.39121
ENSONIG00000001422	ENSONIG00000001422	gdpd4a	GL831203.1:3223885-3259868		5.62765	0.115355	0.148274	0	7.6722	4.03801	0.478703	0.134831
ENSONIG00000001423	ENSONIG00000001423	snrnp25	GL831149.1:4399382-4402789		6.91988	3.37468	0.736873	0	8.75888	20.1671	6.11017	4.71808
ENSONIG00000001424	ENSONIG00000001424	polr3k	GL831149.1:4403183-4405819		14.5277	76.3506	10.5726	30.9182	37.053	131.599	36.4079	55.5267
ENSONIG00000001425	ENSONIG00000001425	CDIP1	GL831149.1:4409356-4412695		17.0102	8.32226	4.9493	3.38587	23.8155	7.52926	14.9664	12.7889
ENSONIG00000001426	ENSONIG00000001426	kcnk10b	GL831153.1:5648848-5668433		14.9066	0.0691283	0.0257825	0	0.0997419	0.055565	0.081538	0.0193211
ENSONIG00000001427	ENSONIG00000001427	ANKRD50	GL831156.1:4371519-4410265		13.5575	7.7974	0.934211	0.677558	4.80265	3.64975	4.79535	1.1606
ENSONIG00000001428	ENSONIG00000001428	mgrn1b	GL831149.1:4422070-4428020		43.3518	11.7012	6.72697	4.81785	32.3739	4.3232	9.64543	7.51396
ENSONIG00000001429	ENSONIG00000001429	-	GL831156.1:4470152-4475085		0	0.114683	4.94807	0	0.462274	0	0	139.243
ENSONIG00000001430	ENSONIG00000001430	pak1	GL831203.1:3279695-3348632		1.1254	1.47753	0.495334	0.124785	3.66141	0.199043	0	0.6082
ENSONIG00000001431	ENSONIG00000001431	FAT4	GL831156.1:4514670-4613571		1.01943	0.842632	0.28044	0.293946	1.67315	0.182472	0.317947	0.380517
ENSONIG00000001432	ENSONIG00000001432	supt3h	GL831135.1:9128672-9148981		4.3953	5.69121	2.50193	3.00598	11.5832	11.6424	4.43879	11.5031
ENSONIG00000001433	ENSONIG00000001433	BDKRB2 (1 of 4)	GL831153.1:5683274-5686178		0.563431	3.16277	1.49387	1.04029	9.42749	0.743074	8.85796	1.69022
ENSONIG00000001434	ENSONIG00000001434	bdkrb1	GL831153.1:5807758-5809222		0	0	0	0	0.246275	0.145514	0	0
ENSONIG00000001435	ENSONIG00000001435	BDKRB2 (2 of 4)	GL831153.1:5816705-5820336		1.73949	2.63136	0.934555	0	0.456255	0.29812	7.09689	0.147967
ENSONIG00000001436	ENSONIG00000001436	-	GL831135.1:9128672-9148981		0.2339	0	0	0	0.162436	0	0	0
ENSONIG00000001437	ENSONIG00000001437	fstl1a	GL831135.1:9149922-9152869		0.259391	0.880535	0	0	0	0.116331	0	0.0615922
ENSONIG00000001438	ENSONIG00000001438	si:dkey-32n7.9 (1 of 12)	GL831153.1:5839400-5840227		0	0	0	0	0	0	0	0
ENSONIG00000001439	ENSONIG00000001439	aanat2	GL831149.1:4435272-4436199		0	0.945314	0	0	2.03704	0	0	0
ENSONIG00000001440	ENSONIG00000001440	cx41.8	GL831135.1:9161431-9173282		3.76986	153.496	2.27116	0.408946	2.37365	0.273156	1.64648	4.28312
ENSONIG00000001441	ENSONIG00000001441	rhbdf1	GL831149.1:4437226-4446041		9.64873	19.085	2.44207	0.769071	3.7487	0.461335	6.17994	7.83723
ENSONIG00000001442	ENSONIG00000001442	LEPROTL1	GL831156.1:4862590-4866877		20.1225	6.76036	2.23657	0	22.3847	0.747033	6.1982	6.67376
ENSONIG00000001443	ENSONIG00000001443	aqp11	GL831203.1:3471333-3474118		15.6274	1.78348	0.156608	0	0.932277	0.0613922	0	1.02727
ENSONIG00000001444	ENSONIG00000001444	icln (1 of 2)	GL831203.1:3480260-3484592		8.57155	7.79363	1.65591	1.33431	11.4334	9.33061	3.21125	10.3917
ENSONIG00000001445	ENSONIG00000001445	TRIM14	GL832064.1:1598-23991		3.00069	7.4445	5.3971	3.4603	2.82025	0.27223	1.76949	33.6951
ENSONIG00000001446	ENSONIG00000001446	srp72	GL831156.1:4867435-4876260		26.6846	40.4388	11.212	25.8316	32.4844	15.2757	124.347	63.2244
ENSONIG00000001447	ENSONIG00000001447	-	GL832145.1:6053-7211		0	0	0	0	0	0	0	0
ENSONIG00000001448	ENSONIG00000001448	cycsb (1 of 2)	GL831135.1:9446036-9451137		85.6187	490.575	30.2004	13.6984	45.5315	68.6001	171.452	146.933
ENSONIG00000001449	ENSONIG00000001449	-	GL832145.1:9873-12614		0	0	0	0	0	0	0	0
ENSONIG00000001450	ENSONIG00000001450	rbm45	GL831135.1:9452968-9460045		20.2203	15.061	5.10426	4.82021	26.9037	3.45736	4.50758	13.2325
ENSONIG00000001451	ENSONIG00000001451	TTC24	GL831385.1:402110-405728		0.545603	0	0.737277	0	14.8199	1.56012	0	0.264243
ENSONIG00000001452	ENSONIG00000001452	GNRHR (1 of 4)	GL831385.1:412606-417843		1.17095	0	0.0981531	0	0.580441	0	0	0
ENSONIG00000001453	ENSONIG00000001453	mpg	GL831149.1:4473635-4476354		8.0753	8.01377	1.45461	1.31509	14.6687	22.7581	1.56463	4.15551
ENSONIG00000001454	ENSONIG00000001454	nprl3	GL831149.1:4477313-4490287		14.0665	19.923	5.45337	10.8507	26.9221	10.1981	14.5232	22.7117
ENSONIG00000001455	ENSONIG00000001455	-	GL831385.1:427917-434938		0.293428	0	0	0	0.13597	1.01875	0	0
ENSONIG00000001456	ENSONIG00000001456	zc3h15	GL831135.1:9461482-9474734		16.4431	30.1204	8.30803	15.231	45.9907	67.1935	106.289	26.9667
ENSONIG00000001457	ENSONIG00000001457	-	GL831149.1:4494466-4495263		2545.41	25309	2928.19	771.781	720.06	99.3914	1099.9	54320.9
ENSONIG00000001458	ENSONIG00000001458	-	GL831491.1:46977-48214		3.60877	6.03162	0.557306	1.11655	2.55175	0	1.22621	3.61325
ENSONIG00000001459	ENSONIG00000001459	TRIM47 (1 of 70)	GL831491.1:59151-60829		0.489014	1.17462	0.421108	0.199219	0.181315	0.209816	0.685087	2.65682
ENSONIG00000001460	ENSONIG00000001460	polr3glb	GL831385.1:443926-446061		40.6328	30.9548	4.38268	10.4497	21.7509	1.70111	22.7431	15.6496
ENSONIG00000001461	ENSONIG00000001461	TRIM47 (2 of 70)	GL831491.1:130050-131172		0.286348	0.475461	0.172438	0	0.436843	0	0	2.50533
ENSONIG00000001462	ENSONIG00000001462	TRIM47 (3 of 70)	GL831491.1:146105-154502		0.948364	1.64125	0.524442	0.311825	0.861849	0.202937	0.549938	1.57157
ENSONIG00000001463	ENSONIG00000001463	-	GL831135.1:9692828-9751031		5.45727	5.15447	0.659685	2.77165	8.1234	1.94865	2.80329	2.25342
ENSONIG00000001464	ENSONIG00000001464	-	GL831491.1:162987-184135		2.64456	1.38591	0.226112	0.27647	5.3049	0.211091	0	2.2996
ENSONIG00000001465	ENSONIG00000001465	epdr1	GL831491.1:189724-193262		51.3609	34.9936	1.69097	77.516	6.44715	13.7203	35.6812	3.06652
ENSONIG00000001466	ENSONIG00000001466	zgc:113060	GL831385.1:447961-465059		0	1.2077	0.612952	0	0.139538	0.289489	0.358617	2.75681
ENSONIG00000001467	ENSONIG00000001467	txnipb	GL831385.1:488878-491413		1.12192	9.16322	1.87172	6.15674	14.6501	41.4493	26.1827	5.70855
ENSONIG00000001468	ENSONIG00000001468	nckap1	GL831135.1:9692828-9751031		33.999	7.69405	2.79606	3.45451	18.4402	2.09412	3.09917	4.14508
ENSONIG00000001469	ENSONIG00000001469	nol7	GL831491.1:194122-199359		7.98295	8.88306	2.36116	8.45203	32.4473	96.6741	4.04714	13.9104
ENSONIG00000001470	ENSONIG00000001470	-	GL831149.1:4499185-4530460		0.978811	7.64418	1.7106	0.460659	0.160968	0.480954	0.320559	11.7286
ENSONIG00000001471	ENSONIG00000001471	ranbp9	GL831491.1:206005-232772		11.3913	14.7398	4.4864	4.86657	46.5224	22.6481	9.81483	12.4742
ENSONIG00000001472	ENSONIG00000001472	-	GL831341.1:10976-170622		1.25979	0.136624	0.149486	0	0.735489	0.810103	0.156425	3.83151
ENSONIG00000001473	ENSONIG00000001473	-	GL831149.1:4499185-4530460		0	0	0	0	0	0	0	16.5341
ENSONIG00000001474	ENSONIG00000001474	bnipl	GL831385.1:497648-507527		1.35855	0.298879	1.07779	0	0.126654	1.36289	0.625245	21.26
ENSONIG00000001475	ENSONIG00000001475	-	GL831341.1:173461-175222		0.719753	0	0	0	0	1.06302	0	0.154012
ENSONIG00000001476	ENSONIG00000001476	mag	GL831341.1:185511-192579		61.5793	3.12431	0.058167	0.144326	0	0	0.996971	0.0680242
ENSONIG00000001477	ENSONIG00000001477	snapc1a	GL831156.1:4879413-4880648		0.187379	0.632717	0	0	1.301	85.7044	10.6309	0.039517
ENSONIG00000001478	ENSONIG00000001478	arl9	GL831156.1:4882062-4886969		3.54922	6.31973	2.9605	4.97822	4.02508	3.03835	4.13558	11.4541
ENSONIG00000001479	ENSONIG00000001479	lsr	GL831341.1:208456-219268		0.915598	0.368523	13.0132	18.9713	16.4315	16.2674	3.02078	2.0644
ENSONIG00000001480	ENSONIG00000001480	-	GL831149.1:4499185-4530460		1.1328	0	0	0	0	0	0	0
ENSONIG00000001481	ENSONIG00000001481	ppp1r1c	GL831135.1:9758165-9772749		15.9126	0	1.99359	0	6.62811	0	0	1.56686
ENSONIG00000001482	ENSONIG00000001482	hopx	GL831156.1:4905906-4913497		44.9369	189.678	10.045	10.3566	12.4904	1.47155	7.68379	123.422
ENSONIG00000001483	ENSONIG00000001483	SEC24B	GL831156.1:4931302-4958301		15.1849	36.0891	4.42481	8.56236	24.5438	12.1495	4.63003	19.1965
ENSONIG00000001484	ENSONIG00000001484	prune	GL831385.1:510813-520491		12.8565	30.8925	6.78695	11.3469	25.0743	77.098	28.8916	12.8718
ENSONIG00000001485	ENSONIG00000001485	plekha3	GL831135.1:9781278-9792508		4.01086	7.78253	0.995484	0.460078	15.5363	3.35327	1.70123	3.99362
ENSONIG00000001486	ENSONIG00000001486	si:dkey-22o22.2	GL831341.1:350750-427825		0.0862214	0.0367783	0	0.0330521	0.789789	0.485528	0.182634	0.022176
ENSONIG00000001487	ENSONIG00000001487	FAM134B	GL831491.1:244108-272094		21.0754	64.5806	0.168515	0.512291	1.51191	0.0324932	15.7709	0.0546443
ENSONIG00000001488	ENSONIG00000001488	-	GL831149.1:4499185-4530460		0	0	0	0	0	0	0	0
ENSONIG00000001489	ENSONIG00000001489	-	GL831149.1:4538183-4538912		1692.99	15497.7	2005.05	539.652	437.974	71.9517	703.003	53942.4
ENSONIG00000001490	ENSONIG00000001490	myo1eb	GL831385.1:526657-539850		0	0.0780472	1.39152	0	0.10104	16.0072	1.76431	0.0917391
ENSONIG00000001491	ENSONIG00000001491	klhl4 (1 of 2)	GL831135.1:9793266-9794772		0	1.19204	0	0	8.05874	0	0	0
ENSONIG00000001492	ENSONIG00000001492	TRIM47 (4 of 70)	GL831491.1:275500-285128		0.376863	1.07015	0.405365	0	0.0994293	0	0.246502	1.82629
ENSONIG00000001493	ENSONIG00000001493	lhb	GL831135.1:9799939-9802946		0	0	0	0	0.633373	0	0	0
ENSONIG00000001494	ENSONIG00000001494	ccne2	GL831341.1:441281-449099		0.115777	0.759005	0.381763	0.0992611	11.9228	0.858445	0.116375	17.6231
ENSONIG00000001495	ENSONIG00000001495	COX20	GL831135.1:9804394-9807367		14.9259	11.651	4.69131	6.69687	18.5915	39.7494	23.2029	18.127
ENSONIG00000001496	ENSONIG00000001496	-	GL831135.1:9811269-9822297		0	0	0	0	0	0	0	0
ENSONIG00000001497	ENSONIG00000001497	SLC22A7 (1 of 4)	GL831135.1:9811269-9822297		0.175246	0.547673	62.1643	24.8267	20.9746	0.378994	0.200067	0.051624
ENSONIG00000001498	ENSONIG00000001498	-	GL831491.1:395027-439649		1.46013	1.94823	0.456377	0.843404	3.53937	1.97246	0.802135	4.06192
ENSONIG00000001499	ENSONIG00000001499	PGBD4 (1 of 8)	GL831491.1:395027-439649		4.48868	5.45271	1.3506	0.971277	1.75113	5.59114	0.712777	10.5736
ENSONIG00000001500	ENSONIG00000001500	TSTD2	GL831156.1:4984512-5001129		5.40571	6.00556	2.50999	3.70134	7.5932	16.27	13.463	10.0395
ENSONIG00000001501	ENSONIG00000001501	tp53inp1	GL831341.1:458227-466075		1.64261	3.1636	1.19509	4.11733	1.42231	0.0955756	1.51135	1.45125
ENSONIG00000001502	ENSONIG00000001502	NCBP1	GL831156.1:4984512-5001129		10.0763	6.68201	2.33675	1.59337	21.4753	7.96034	5.49886	21.74
ENSONIG00000001503	ENSONIG00000001503	NAGPA	GL831341.1:486459-505727		1.15788	3.45443	4.16299	4.16324	12.8576	9.0095	4.15026	23.4956
ENSONIG00000001504	ENSONIG00000001504	hbaa1	GL831149.1:4539759-4541291		693.796	7616.63	1052.23	224.131	237.468	30.8632	374.47	0
ENSONIG00000001505	ENSONIG00000001505	epas1b	GL831135.1:9840160-9890262		27.076	71.4033	7.80047	12.9549	10.3246	1.42447	4.42453	4.62729
ENSONIG00000001506	ENSONIG00000001506	ndufaf6	GL831341.1:506040-530335		4.51627	6.4312	2.95879	5.12545	14.4124	37.2979	6.27036	3.84937
ENSONIG00000001507	ENSONIG00000001507	-	GL831341.1:586938-587709		6.04	0.712173	0.120729	0	0.306863	0.174513	0	0
ENSONIG00000001508	ENSONIG00000001508	wdr73	GL831341.1:695342-706823		1.44396	1.05978	0.573708	0	14.3613	6.23717	1.45334	4.05395
ENSONIG00000001509	ENSONIG00000001509	SORCS2	GL831419.1:1059-383477		14.4418	1.10548	0.124618	0	4.99661	0.0371804	0.335076	1.00929
ENSONIG00000001510	ENSONIG00000001510	pi4kb	GL831385.1:556079-565164		16.8632	14.8393	6.40619	11.5281	63.2791	7.65911	45.6671	16.7686
ENSONIG00000001511	ENSONIG00000001511	C8orf37	GL831341.1:718086-731275		1.96735	3.55765	2.85606	1.32346	14.4149	2.55513	0.761518	0.730652
ENSONIG00000001512	ENSONIG00000001512	si:ch211-149p10.2	GL831341.1:734333-738786		3.29856	3.47881	2.70005	0.134795	1.81546	0.713074	1.44368	23.6562
ENSONIG00000001513	ENSONIG00000001513	selenbp1	GL831385.1:570291-574667		25.199	161.165	127.174	89.0137	7.64646	1.42545	9.19964	1.94794
ENSONIG00000001514	ENSONIG00000001514	zgc:113232	GL831341.1:747341-779030		0.0813748	0	0.0495324	0	0	0	0	0.115417
ENSONIG00000001515	ENSONIG00000001515	-	GL831149.1:4551747-4552404		0	0	0	0	0	0.454326	0	0.609273
ENSONIG00000001516	ENSONIG00000001516	grpel1	GL831419.1:404818-420507		23.0232	31.433	12.3354	30.0653	26.8106	83.3476	17.9874	35.1375
ENSONIG00000001517	ENSONIG00000001517	-	GL831149.1:4552838-4553559		0	0	0	0	0.846577	0	0	5.30699
ENSONIG00000001518	ENSONIG00000001518	-	GL831385.1:598159-608010		0	2.52423	0	0	0.404673	0	0.32844	0
ENSONIG00000001519	ENSONIG00000001519	tada2b	GL831419.1:420965-433701		4.62946	5.89918	1.11608	0.823408	22.8732	0.197841	1.87586	5.43791
ENSONIG00000001520	ENSONIG00000001520	snrnp48	GL831341.1:779580-786758		11.9305	13.0548	7.20516	9.55548	30.0563	8.27023	6.48934	21.9716
ENSONIG00000001521	ENSONIG00000001521	NPR1 (1 of 2)	GL831385.1:612775-710383		1.42606	6.67402	9.87392	8.04885	2.61074	0.2057	1.9489	0.689919
ENSONIG00000001522	ENSONIG00000001522	ccdc96	GL831419.1:420965-433701		0.791325	1.29611	0.785313	0.0815158	10.1882	0.281955	1.69031	0.585111
ENSONIG00000001523	ENSONIG00000001523	tbc1d14	GL831419.1:474127-514061		2.56453	1.6121	1.26477	0.425309	5.73832	2.86668	0.845858	4.86192
ENSONIG00000001524	ENSONIG00000001524	kank2	GL831149.1:4560785-4567780		4.2566	50.1767	1.28517	1.40324	6.7209	0.503483	3.30236	0.626347
ENSONIG00000001525	ENSONIG00000001525	MFSD7	GL831156.1:5003383-5021187		1.13848	0.933529	1.53055	0.167375	3.57625	5.82438	0.754365	3.79876
ENSONIG00000001526	ENSONIG00000001526	DOCK6	GL831149.1:4581945-4612551		3.69302	4.20876	1.9599	4.84056	17.1859	1.83809	2.16801	3.4489
ENSONIG00000001527	ENSONIG00000001527	-	GL831341.1:799980-801780		0	0	0	0	4.67357	0.70192	0	0
ENSONIG00000001528	ENSONIG00000001528	prkcea	GL831135.1:9897196-9987190		2.08884	0.770314	0.0970613	0	5.32876	0	0.263443	3.27008
ENSONIG00000001529	ENSONIG00000001529	-	GL831341.1:869867-886560		2.52617	2.33317	0.602191	0.572632	0.696288	0.0947554	1.1089	10.3629
ENSONIG00000001530	ENSONIG00000001530	zgc:158564	GL831419.1:518645-528855		4.15619	11.41	3.07018	2.30854	53.4717	1.75042	6.06165	19.3966
ENSONIG00000001531	ENSONIG00000001531	-	GL831341.1:897977-899759		0.340735	0.680277	3.21825	0	0.337867	0.115629	0	36.062
ENSONIG00000001532	ENSONIG00000001532	PCGF3	GL831156.1:5025510-5087573		3.1946	3.47098	4.36546	3.35029	9.78011	4.79093	2.2226	9.24678
ENSONIG00000001533	ENSONIG00000001533	-	GL831341.1:905789-907648		33.2182	19.0646	58.1286	5.09164	7.24161	3.35979	1.80951	165.409
ENSONIG00000001534	ENSONIG00000001534	isg20l2	GL831341.1:919321-929277		3.81098	2.92313	2.30601	4.17769	21.6586	5.35306	0.980635	4.18551
ENSONIG00000001535	ENSONIG00000001535	-	GL831419.1:547532-548631		1.19962	5.40415	1.5905	9.14473	1.32539	0.573639	28.6255	3.21638
ENSONIG00000001536	ENSONIG00000001536	S100P	GL831419.1:548786-549934		0	0	0	14.9232	0.591878	0	0	0
ENSONIG00000001537	ENSONIG00000001537	rrnad1	GL831341.1:919321-929277		2.80096	4.67103	2.47405	2.52284	8.53175	2.95902	2.19116	8.7218
ENSONIG00000001538	ENSONIG00000001538	elavl3	GL831149.1:4627692-4632875		6.32656	0	0.0571306	0	0.276997	0	0	0
ENSONIG00000001539	ENSONIG00000001539	CPLX1 (1 of 2)	GL831156.1:5218697-5224993		1262.56	15.146	1.11211	2.62243	5.41252	1.47256	3.40061	1.46836
ENSONIG00000001540	ENSONIG00000001540	SLC29A2 (1 of 2)	GL831419.1:598776-611498		27.6288	45.2091	12.0963	13.6113	13.4601	0.522772	10.7539	50.3459
ENSONIG00000001541	ENSONIG00000001541	smu1a	GL831156.1:5379152-5388303		21.9759	25.8311	8.95121	11.8114	34.76	24.634	27.5971	41.3772
ENSONIG00000001542	ENSONIG00000001542	prkcsh	GL831149.1:4639766-4644231		23.8592	15.8705	11.2481	27.1047	38.0308	54.5039	4.40289	46.2679
ENSONIG00000001543	ENSONIG00000001543	bcan	GL831341.1:941327-968612		26.2208	0.40068	6.29318	0	0.0998245	0.0538107	0.0829117	0.0117673
ENSONIG00000001544	ENSONIG00000001544	PPP1CB	GL831419.1:613677-621182		80.1049	210.11	32.2991	61.1472	78.7717	82.2263	482.754	92.3233
ENSONIG00000001545	ENSONIG00000001545	rela	GL831419.1:641269-651271		12.9367	29.3954	10.6074	17.512	10.8274	1.22952	14.4377	32.0986
ENSONIG00000001546	ENSONIG00000001546	drap1	GL831419.1:654563-660882		9.77729	15.1721	3.97092	8.59309	17.1119	2.47104	5.24554	14.6838
ENSONIG00000001547	ENSONIG00000001547	hapln2	GL831341.1:971729-976703		27.9223	1.14476	0.177842	0	0.354775	0	10.582	0.454816
ENSONIG00000001548	ENSONIG00000001548	pde4a	GL831149.1:4645296-4693310		28.1569	3.02427	1.10504	0.258698	0.389128	0.104383	1.16644	4.6194
ENSONIG00000001549	ENSONIG00000001549	CPXM1 (2 of 2)	GL831156.1:5388591-5415791		0.192737	0.261988	0.0733548	0.122405	0.166577	0.0602963	0	2.26429
ENSONIG00000001550	ENSONIG00000001550	rhbg	GL831341.1:988692-999039		1.92728	1.0041	7.28786	0.121781	1.49898	0.280782	0.283942	0.51345
ENSONIG00000001551	ENSONIG00000001551	MAP3K11	GL831419.1:666283-708447		0	0.204533	0.0183246	0	0.367789	0.246339	0	0.722022
ENSONIG00000001552	ENSONIG00000001552	atrnl1a	GL831135.1:9999068-10201266		3.75517	7.20571	1.34597	6.79267	3.16582	1.18773	3.4648	0.150368
ENSONIG00000001553	ENSONIG00000001553	dek	GL831385.1:719474-724854		14.0214	11.9616	4.71626	5.39722	53.6676	27.0656	8.9102	39.4188
ENSONIG00000001554	ENSONIG00000001554	mef2d	GL831341.1:1118172-1178520		2.57776	1.03546	0.197299	0.371178	1.28339	0.989674	5.1268	2.18486
ENSONIG00000001555	ENSONIG00000001555	ikbkap	GL831156.1:5388591-5415791		4.7978	5.19199	1.47923	2.17387	10.0433	8.72444	5.52564	7.59743
ENSONIG00000001556	ENSONIG00000001556	KCNV1	GL831385.1:731965-737862		2.66872	0.440672	0.083399	0	7.93523	0.324785	0	0.0251207
ENSONIG00000001557	ENSONIG00000001557	-	GL831385.1:783308-795046		2.57468	4.35205	0.339892	0.575327	10.3936	3.39011	4.19148	0.313463
ENSONIG00000001558	ENSONIG00000001558	gfra1a	GL831135.1:10354007-10454431		5.48804	0.664733	2.26474	0.598529	5.61134	11.7994	0.652921	0.133806
ENSONIG00000001559	ENSONIG00000001559	raver1	GL831149.1:4718873-4728779		0.158324	0.678339	0.743169	0.237176	16.5294	5.11056	0.97096	3.39074
ENSONIG00000001560	ENSONIG00000001560	-	GL831341.1:1212863-1215007		0	0	0	0	0	0	0	0.762574
ENSONIG00000001561	ENSONIG00000001561	tyk2	GL831149.1:4732870-4742119		32.1187	28.3826	17.884	14.1006	37.5325	7.71862	15.8895	59.8762
ENSONIG00000001562	ENSONIG00000001562	ccdc172	GL831135.1:10457822-10474840		0	0	0	0	22.2358	0.413582	0	0
ENSONIG00000001563	ENSONIG00000001563	anp32e (1 of 2)	GL831385.1:798680-807627		36.801	52.5941	14.899	8.73366	40.3956	14.2682	37.7218	64.4354
ENSONIG00000001564	ENSONIG00000001564	si:ch1073-126c3.2	GL831135.1:10476969-10483000		0.159389	0	0.748501	723.151	0.814753	0.466833	0	0
ENSONIG00000001565	ENSONIG00000001565	plekho1b	GL831385.1:810442-822289		3.63432	5.39072	4.08565	1.43049	17.2092	3.53774	2.64717	34.3519
ENSONIG00000001566	ENSONIG00000001566	cbr1 (1 of 4)	GL831135.1:11199908-11203543		7.2095	0.979148	7.02454	4.62741	10.3957	17.9192	3.63225	0.151021
ENSONIG00000001567	ENSONIG00000001567	CREB3L4	GL831385.1:825022-829079		6.16579	14.5625	3.07884	6.34604	16.1008	12.0623	26.5404	12.0992
ENSONIG00000001568	ENSONIG00000001568	CDC37	GL831149.1:4745556-4749602		42.0329	32.892	9.69745	11.3104	92.3734	16.9697	22.0349	42.1755
ENSONIG00000001569	ENSONIG00000001569	tgfbi	GL831156.1:5420566-5441560		7.26633	10.1804	10.1133	1.65906	6.61667	1.23011	28.2711	71.1716
ENSONIG00000001570	ENSONIG00000001570	si:ch211-138a11.5	GL831385.1:832573-835379		0.217963	0	0.750133	0.308721	0.584461	2.11766	0	0
ENSONIG00000001571	ENSONIG00000001571	slc39a3	GL831385.1:837686-845312		1.92117	6.34653	2.83618	3.08304	2.30593	1.54363	5.48013	4.41476
ENSONIG00000001572	ENSONIG00000001572	cbr1 (2 of 4)	GL831135.1:11209684-11214121		0	0	0.0721477	0	0.173621	0.396707	0	0.0674992
ENSONIG00000001573	ENSONIG00000001573	si:ch211-66e2.5	GL831149.1:4756921-4772407		13.7168	10.0483	2.30031	8.03968	4.52164	1.19384	2.18913	0.287769
ENSONIG00000001574	ENSONIG00000001574	dnmt1 (1 of 2)	GL831149.1:4841570-4854459		7.11829	3.94019	1.85912	1.10736	28.7549	16.2066	3.27316	43.5461
ENSONIG00000001575	ENSONIG00000001575	cbr1 (3 of 4)	GL831135.1:11250426-11252987		0.149382	0	0.0471463	0	0.112449	0	0	0.0495258
ENSONIG00000001576	ENSONIG00000001576	CRTC2	GL831385.1:847152-876654		13.0419	14.7885	3.85937	3.62548	11.0715	3.44153	8.04283	10.6538
ENSONIG00000001577	ENSONIG00000001577	cbr1 (4 of 4)	GL831135.1:11254409-11259484		47.3536	46.0337	21.2049	19.4851	25.1093	32.3772	29.1856	23.0592
ENSONIG00000001578	ENSONIG00000001578	klhdc8b	GL831362.1:136933-303477		0.508201	0.254379	0.139178	0	1.13383	0.0332829	0.863891	0.024267
ENSONIG00000001579	ENSONIG00000001579	usp19	GL831362.1:366725-390533		10.9669	15.8332	6.84498	4.74967	14.0487	7.34496	38.1098	14.6024
ENSONIG00000001580	ENSONIG00000001580	setd4	GL831135.1:11259491-11265940		3.80084	4.62504	2.55298	4.11562	14.8426	7.49102	4.30645	3.39409
ENSONIG00000001581	ENSONIG00000001581	cryzl1	GL831135.1:11266858-11272759		14.1095	11.9632	2.40178	5.16067	10.5874	67.386	6.72042	12.0944
ENSONIG00000001582	ENSONIG00000001582	DENND4B	GL831385.1:877798-904723		18.0764	11.0459	5.33009	2.37945	11.0847	1.30436	12.1593	30.8513
ENSONIG00000001583	ENSONIG00000001583	exosc3	GL831156.1:5447395-5451091		14.7131	6.09951	4.25644	4.69955	22.7618	30.4281	31.535	14.75
ENSONIG00000001584	ENSONIG00000001584	lamb2	GL831362.1:390543-439111		3.74782	63.2278	22.8023	0.531099	12.4171	1.68506	63.0829	2.14514
ENSONIG00000001585	ENSONIG00000001585	b4galt1	GL831156.1:5509885-5516984		2.73137	7.26683	3.9532	3.02898	7.93324	1.60138	2.37778	7.71113
ENSONIG00000001586	ENSONIG00000001586	itsn1	GL831135.1:11273682-11321684		3.31533	2.38937	0.457871	0.549723	3.46739	0.163769	0.487611	4.61096
ENSONIG00000001587	ENSONIG00000001587	aldh5a1	GL831385.1:914340-916386		38.1764	82.6921	52.6409	25.4029	19.0091	21.6329	30.0981	62.622
ENSONIG00000001588	ENSONIG00000001588	pdxkb	GL831135.1:11336649-11358799		2.29418	0	0	0	10.3316	0.122233	0	0.267299
ENSONIG00000001589	ENSONIG00000001589	rest	GL831156.1:5556098-5564558		0.931103	3.72382	2.02534	1.72511	9.71781	1.43956	2.65468	7.03614
ENSONIG00000001590	ENSONIG00000001590	noa1	GL831156.1:5568235-5573431		10.4694	8.35279	3.93874	6.51849	19.309	20.1218	27.5218	7.82131
ENSONIG00000001591	ENSONIG00000001591	-	GL831149.1:4905825-4906785		0	0	0	0	0	0	0	0.164012
ENSONIG00000001592	ENSONIG00000001592	eif3g	GL831149.1:4941031-4944999		84.3667	136.129	52.48	98.925	135.848	110.727	229.296	224.533
ENSONIG00000001593	ENSONIG00000001593	CD22 (6 of 10)	GL831897.1:12-4440		0.879669	0.469684	1.19551	0	0.464169	5.99013	0.574506	25.5004
ENSONIG00000001594	ENSONIG00000001594	-	GL831897.1:44353-45856		0	0	0	0	0	0	0	0
ENSONIG00000001595	ENSONIG00000001595	nipsnap3	GL831156.1:5573610-5576533		19.6729	303.173	184.755	205.541	23.5723	33.9125	77.4633	34.0361
ENSONIG00000001596	ENSONIG00000001596	pax7b	GL831662.1:22637-112929		1.18471	0.411619	0	0.0652361	0.510319	0.0522207	0.833092	0
ENSONIG00000001597	ENSONIG00000001597	lamb2l	GL831362.1:441417-494863		2.86774	1.28662	1.32253	0.42432	12.8483	1.1985	0.35429	1.50834
ENSONIG00000001598	ENSONIG00000001598	ppan	GL831149.1:4949117-4952699		10.3326	11.633	4.8385	9.64878	55.7304	125.011	25.1396	46.4174
ENSONIG00000001599	ENSONIG00000001599	abca1b	GL831156.1:5579389-5619099		2.85823	6.47692	1.9476	1.61907	8.41782	5.35543	2.12513	4.43458
ENSONIG00000001600	ENSONIG00000001600	map3k7	GL831328.1:209412-237954		8.74439	12.2923	5.9988	10.012	13.1407	6.03579	11.5261	7.75767
ENSONIG00000001601	ENSONIG00000001601	angptl6	GL831149.1:4955242-4959264		0	0.231201	0.206114	25.5285	1.03942	0.102804	0	0.703419
ENSONIG00000001602	ENSONIG00000001602	-	GL831149.1:5026859-5031291		0.478415	0.891156	0.297437	0	3.44852	0	0	11.132
ENSONIG00000001603	ENSONIG00000001603	-	GL831149.1:5039332-5040659		2.33913	0	0.095551	0	0.530436	0	0	1.54316
ENSONIG00000001604	ENSONIG00000001604	TRIP10 (2 of 2)	GL831149.1:5048261-5068409		9.11552	18.4362	4.19083	2.17785	16.5531	5.55427	4.49732	5.2649
ENSONIG00000001605	ENSONIG00000001605	si:rp71-17i16.5	GL831362.1:502849-523853		0.0787932	0.35978	0.0911779	0	0.218925	0.0374001	0.0790979	0.15978
ENSONIG00000001606	ENSONIG00000001606	bach2b	GL831328.1:308404-340357		0	0.112366	0.0796621	0	0.232769	0	0	0.755919
ENSONIG00000001607	ENSONIG00000001607	mfn2	GL831662.1:155407-182817		27.1453	21.0711	4.07448	7.01872	26.2069	12.9935	7.65472	7.69393
ENSONIG00000001608	ENSONIG00000001608	cx52.6	GL831328.1:348517-353334		0.111702	3.10006	0	0	0.129584	0	0	0.0917087
ENSONIG00000001609	ENSONIG00000001609	casp8ap2	GL831328.1:357617-373224		2.37101	2.44036	0.78535	0.946724	11.1047	6.32222	2.2505	7.34935
ENSONIG00000001610	ENSONIG00000001610	mdn1	GL831328.1:373266-424685		1.40444	1.12301	0.452411	1.08919	4.94038	3.46886	1.72046	4.2551
ENSONIG00000001611	ENSONIG00000001611	TNNC2 (1 of 2)	GL831362.1:538017-544902		0	0	0.232611	1.33679	0	0	438.281	1.41707
ENSONIG00000001612	ENSONIG00000001612	tnnc2	GL831362.1:546830-549605		4.65354	16.2806	1.56688	6.47326	5.11798	0.922404	13370.5	0.636203
ENSONIG00000001613	ENSONIG00000001613	olfm2a	GL831149.1:5124494-5155043		37.4427	0.825214	0.0303815	13.3329	0.338377	0.112191	0	4.99181
ENSONIG00000001614	ENSONIG00000001614	col5a3a	GL831149.1:5191405-5237228		3.01449	2.85495	0.638815	0.346721	3.52093	0.215024	6.98863	0.106457
ENSONIG00000001615	ENSONIG00000001615	slc35c2	GL831362.1:554251-600327		0.771729	2.00041	0.414633	2.53887	3.51679	2.0202	2.13545	1.78847
ENSONIG00000001616	ENSONIG00000001616	ankrd6b	GL831328.1:435336-477762		8.79026	8.63257	3.66653	7.16352	4.48087	0.435303	2.17315	2.83972
ENSONIG00000001617	ENSONIG00000001617	plagx	GL831662.1:191398-192703		1.29077	0.464483	0.842423	0.584771	4.1808	1.02803	1.30212	2.41174
ENSONIG00000001618	ENSONIG00000001618	-	GL832102.1:7411-8225		0.473772	0.846641	3.36141	0	5.11581	0.396636	0	4.99229
ENSONIG00000001619	ENSONIG00000001619	dpm1	GL831362.1:610088-616549		28.0815	45.0034	10.8783	18.9003	70.7804	84.1744	34.7094	42.8386
ENSONIG00000001620	ENSONIG00000001620	znf292b	GL831328.1:531284-549024		5.77735	4.94533	1.64	1.62884	11.9423	3.57867	2.52329	14.9622
ENSONIG00000001621	ENSONIG00000001621	-	GL831804.1:50948-52410		0	0	0	0	0	0	0	0.0575158
ENSONIG00000001622	ENSONIG00000001622	-	GL831804.1:90282-97376		1.84026	0.485735	0.818726	0.670509	0.605563	0.175594	0.702244	1.53899
ENSONIG00000001623	ENSONIG00000001623	adnpb	GL831362.1:617593-629537		8.90745	2.70933	1.26749	1.34096	12.744	2.6536	1.73374	7.82281
ENSONIG00000001624	ENSONIG00000001624	cx28.8	GL831328.1:551559-554457		0.341254	0	0	0	0	0	0	0.178138
ENSONIG00000001625	ENSONIG00000001625	pard6b	GL831362.1:641957-659683		1.75327	2.11097	6.86501	1.89275	6.82268	1.31282	0.554084	0.710047
ENSONIG00000001626	ENSONIG00000001626	SMIM8	GL831328.1:557868-558758		54.3626	319.41	54.6234	179.89	114.38	102.028	277.296	32.2032
ENSONIG00000001627	ENSONIG00000001627	ddx51	GL831328.1:559950-565458		2.8146	6.26193	1.75247	1.91797	11.2404	26.6518	10.3039	9.31532
ENSONIG00000001628	ENSONIG00000001628	arfgef2	GL831362.1:663111-687186		5.55378	3.21803	2.03577	2.1202	14.6162	2.33148	3.71502	7.73263
ENSONIG00000001629	ENSONIG00000001629	TILRAD51	GL831328.1:599138-606559		0.201421	0.985044	0.477039	0.304351	28.7639	74.905	4.60353	13.8855
ENSONIG00000001630	ENSONIG00000001630	rmdn3	GL831328.1:607446-616058		16.3507	3.8624	2.30695	0.514314	3.30755	0.374164	0	1.61436
ENSONIG00000001631	ENSONIG00000001631	SLC44A1 (1 of 2)	GL831156.1:5633323-5654133		2.81296	2.06269	0.325557	0.352848	8.2472	2.35328	1.15636	0.0123234
ENSONIG00000001632	ENSONIG00000001632	BCL2L1 (1 of 2)	GL831362.1:693487-719018		18.6814	10.6604	4.51131	8.06634	17.42	21.6746	8.06039	5.77489
ENSONIG00000001633	ENSONIG00000001633	cox4i2	GL831362.1:724479-727584		73.7552	1638.95	166.529	246.178	10.5	548.98	322.284	8.98288
ENSONIG00000001634	ENSONIG00000001634	si:ch211-241j12.3	GL831328.1:626762-634974		0.681701	2.72384	0.123274	0.0864149	2.3355	5.57423	1.58326	0.120122
ENSONIG00000001635	ENSONIG00000001635	C6orf165	GL831328.1:637675-650996		1.0584	0	1.03424	0	24.8395	29.3018	1.87559	0
ENSONIG00000001636	ENSONIG00000001636	FAM110A (1 of 2)	GL831362.1:783121-784504		2.16251	2.57422	0.889931	0.314168	2.14579	2.86909	1.44444	4.78164
ENSONIG00000001637	ENSONIG00000001637	nsfl1c	GL831362.1:851418-864041		26.7012	20.3557	7.96614	7.67243	29.4847	14.4804	32.7476	39.0405
ENSONIG00000001638	ENSONIG00000001638	kcnk10a	GL831328.1:652324-685509		8.11867	0.128057	0.0233735	0.0623437	1.7951	9.5218	0.48316	0.0144818
ENSONIG00000001639	ENSONIG00000001639	meis2b	GL831328.1:708395-722693		0.53846	0.90617	0	0	1.75008	10.9293	1.97793	0
ENSONIG00000001640	ENSONIG00000001640	fkbp1ab	GL831362.1:864594-874895		159.11	72.4823	8.21077	16.414	36.1416	54.9263	165.549	18.0137
ENSONIG00000001641	ENSONIG00000001641	sdcbp2	GL831362.1:894733-917445		97.863	129.176	34.3207	62.8087	46.2086	4.54392	22.5677	105.024
ENSONIG00000001642	ENSONIG00000001642	rdh8a	GL831149.1:5247121-5252387		12.0542	34.3452	3.00321	80.1592	6.96039	0.0973854	83.5771	0.332309
ENSONIG00000001643	ENSONIG00000001643	snphb	GL831362.1:925384-929034		0.878814	0	0	0	0.25962	0	0	1.20254
ENSONIG00000001644	ENSONIG00000001644	-	GL831362.1:952692-954293		1.81006	0.200374	0.217748	0.381953	2.97894	3.7969	1.02656	2.84577
ENSONIG00000001645	ENSONIG00000001645	notch3	GL831149.1:5285204-5313571		15.4581	10.7213	6.65554	4.02432	2.62781	0.970862	5.97849	2.46518
ENSONIG00000001646	ENSONIG00000001646	PGBD4 (2 of 8)	GL831592.1:3120-4684		0.27505	0.735291	0	0	0.109743	0	0	0
ENSONIG00000001647	ENSONIG00000001647	-	GL831592.1:147986-149838		0	0	0.104711	0	1.1939	0	0	0.795167
ENSONIG00000001648	ENSONIG00000001648	stxbp6l	GL831328.1:755018-774965		143.873	2.77905	0.533257	0.228892	0.316972	0.0629068	0	0
ENSONIG00000001649	ENSONIG00000001649	-	GL831592.1:169781-171312		0	1.37582	0.0629044	0	0.159897	0	0	1.49183
ENSONIG00000001650	ENSONIG00000001650	-	GL831592.1:183850-191176		0	0	2.1434	0	2.46186	1.10001	0	0.0819774
ENSONIG00000001651	ENSONIG00000001651	hspa5 (1 of 7)	GL831592.1:281214-289062		0.685196	2.735	0.547162	0.23802	0.322794	0.128318	0	0.54417
ENSONIG00000001652	ENSONIG00000001652	ddhd1b	GL831328.1:802498-840877		7.64319	0.371008	0.183266	0	1.04847	0.0151977	0.0625571	0.105003
ENSONIG00000001653	ENSONIG00000001653	CLCC1	GL831140.1:28556-32500		4.88366	6.66494	1.55821	5.53062	10.5364	60.7455	5.82358	10.2372
ENSONIG00000001654	ENSONIG00000001654	ftsj	GL831140.1:33670-41126		11.653	13.0567	4.62693	10.5134	53.1168	11.4762	18.0479	45.7779
ENSONIG00000001655	ENSONIG00000001655	cgrrf1	GL831328.1:846449-857061		18.6001	19.6668	5.60271	7.09563	36.7056	9.88342	11.3302	19.0801
ENSONIG00000001656	ENSONIG00000001656	agla	GL831546.1:39086-100480		22.23	32.5165	9.18093	14.5719	14.3967	7.14293	201.786	59.7728
ENSONIG00000001657	ENSONIG00000001657	psmc6	GL831328.1:857155-864700		41.0837	49.6335	19.8215	17.9956	82.7292	56.646	61.3579	60.4215
ENSONIG00000001658	ENSONIG00000001658	hrasls	GL831140.1:46189-50120		0	0	0.0931653	0	0.255433	0.143394	0	0.0595817
ENSONIG00000001659	ENSONIG00000001659	mfn1b	GL831140.1:67398-80172		16.5395	16.5169	6.79475	3.91008	20.1304	12.9239	9.21137	10.763
ENSONIG00000001660	ENSONIG00000001660	si:ch211-267e7.3	GL831546.1:104833-140505		0.388218	0	0.0404808	0	1.12181	0.633641	0	0.203473
ENSONIG00000001661	ENSONIG00000001661	nus1	GL831328.1:872285-880592		20.8305	10.7417	6.95436	6.86593	22.2098	25.2156	6.13348	21.6152
ENSONIG00000001662	ENSONIG00000001662	las1l (1 of 5)	GL831166.1:4038-5064		1.25615	6.31653	0.171115	0.938904	281.917	173.256	6.62595	8.80701
ENSONIG00000001663	ENSONIG00000001663	RAD54L2 (1 of 2)	GL831166.1:46925-76369		3.90243	1.44473	0.278564	0.452123	5.3945	0.710418	1.93356	3.15982
ENSONIG00000001664	ENSONIG00000001664	slc35f1	GL831328.1:881845-904847		20.8157	0	0	1.51393	0.680534	0.410457	0.402975	0
ENSONIG00000001665	ENSONIG00000001665	brf1a	GL831232.1:8911-115850		2.09336	0.483978	0.226366	0.543924	11.55	7.47843	2.75652	1.97393
ENSONIG00000001666	ENSONIG00000001666	serinc1	GL831328.1:907627-917114		512.347	275.089	60.3914	70.215	90.9383	15.9283	223.164	112.151
ENSONIG00000001667	ENSONIG00000001667	-	GL831149.1:5314034-5315691		1.61643	9.76177	0.554937	0.887934	6.04126	0.249492	1.44621	0.0783022
ENSONIG00000001668	ENSONIG00000001668	rnf2	GL831546.1:184428-202013		21.6528	16.0366	5.68588	6.9607	26.0463	2.34972	14.7452	12.4053
ENSONIG00000001669	ENSONIG00000001669	tmem115	GL831166.1:88962-99018		8.92041	9.17735	3.00354	4.61	14.6607	3.07471	5.37647	7.35644
ENSONIG00000001670	ENSONIG00000001670	rhoab	GL831166.1:99620-111837		54.5584	43.0983	15.7774	8.38687	65.6721	35.3065	23.6622	93.7139
ENSONIG00000001671	ENSONIG00000001671	gnb4b	GL831140.1:85905-98430		13.9423	8.07005	4.94579	1.6511	24.4442	2.17402	2.80628	14.7615
ENSONIG00000001672	ENSONIG00000001672	BTBD6 (2 of 2)	GL831232.1:8911-115850		51.486	18.2444	4.13464	1.30087	8.70781	7.04617	6.30675	5.30711
ENSONIG00000001673	ENSONIG00000001673	soul5	GL831149.1:5320175-5321676		35.5844	124.737	11.2953	26.0667	11.4475	1.16375	207.939	10.4382
ENSONIG00000001674	ENSONIG00000001674	ARPC5 (1 of 2)	GL831546.1:202259-210530		43.7087	82.9265	54.354	26.9874	76.2412	143.921	29.7541	656.831
ENSONIG00000001675	ENSONIG00000001675	sema3h	GL831166.1:123317-171848		4.41229	0	0	0	0.473677	0.0266524	1.06478	0.190693
ENSONIG00000001676	ENSONIG00000001676	JAG2 (1 of 2)	GL831232.1:304435-355927		3.60749	8.6293	8.26943	3.01801	11.526	0.223843	7.42921	0.793295
ENSONIG00000001677	ENSONIG00000001677	hsf2	GL831328.1:921189-937312		6.83222	5.67529	2.09061	4.9643	13.3432	4.77189	2.36719	7.08079
ENSONIG00000001678	ENSONIG00000001678	actl6a	GL831140.1:112526-175699		4.66665	2.51234	2.18836	1.50316	12.4901	3.19049	1.68466	12.6811
ENSONIG00000001679	ENSONIG00000001679	si:dkey-72l14.3	GL831166.1:195241-215001		0	0.291368	0.0257583	0	0	0	0	0
ENSONIG00000001680	ENSONIG00000001680	-	GL832585.1:679-5861		0	0	0	0	0	0	0	0
ENSONIG00000001681	ENSONIG00000001681	mcm9	GL831328.1:1109105-1141905		0.362839	0.163253	0.165847	0.32236	10.0937	1.41483	0.195978	8.26866
ENSONIG00000001682	ENSONIG00000001682	-	AERX01076373.2:20-1308		3.29225	6.67806	1.04158	3.90728	8.22249	29.4112	3.10172	10.7873
ENSONIG00000001683	ENSONIG00000001683	mrpl47	GL831140.1:112526-175699		6.32177	8.53333	3.51104	2.79453	11.4596	16.7484	4.22711	13.375
ENSONIG00000001684	ENSONIG00000001684	cep85l	GL831328.1:1178082-1197016		3.24071	0.275824	0.267414	0.352979	2.97461	0.429863	0.110734	0.376049
ENSONIG00000001685	ENSONIG00000001685	xpc	GL831166.1:275092-287093		4.10058	2.56626	0.860916	1.0672	11.5249	2.53535	1.60978	4.89332
ENSONIG00000001686	ENSONIG00000001686	nr5a5	GL831149.1:5323358-5327510		0.304425	0.702817	0.452022	40.7275	0.422698	0.0344592	0.465034	0
ENSONIG00000001687	ENSONIG00000001687	ndufb5	GL831140.1:112526-175699		142.719	804.638	115.735	118.745	149.018	183.762	322.231	169.209
ENSONIG00000001688	ENSONIG00000001688	gopc	GL831328.1:1201842-1220323		28.9604	18.717	6.87408	6.59497	24.9962	13.1988	11.0606	24.6039
ENSONIG00000001689	ENSONIG00000001689	ube2j1	GL831328.1:1234472-1260739		5.74104	3.72696	2.33014	1.94876	12.8378	3.34694	1.99902	15.5222
ENSONIG00000001690	ENSONIG00000001690	CAMSAP3	GL831149.1:5329305-5352277		6.93175	0.982514	1.10249	0.815766	0.894775	0.576471	0.150696	0.645329
ENSONIG00000001691	ENSONIG00000001691	gabrr2b	GL831328.1:1265893-1285345		0.809424	0.599918	0.0484239	0	0.375835	0	0.298023	0.577862
ENSONIG00000001692	ENSONIG00000001692	usp13	GL831140.1:177089-213170		4.90861	34.6078	0.38202	0.65603	14.411	1.17233	303.595	0.180681
ENSONIG00000001693	ENSONIG00000001693	arih2	GL831166.1:293401-302921		19.1152	30.5104	8.19201	3.89658	33.2395	15.4906	39.1773	16.6769
ENSONIG00000001694	ENSONIG00000001694	recql	GL831328.1:1302131-1312595		5.4725	7.39586	4.38896	2.18071	10.3672	25.0914	7.00383	10.5522
ENSONIG00000001695	ENSONIG00000001695	xab2	GL831149.1:5353635-5361107		7.97992	8.66785	4.57046	3.11423	32.1787	11.1806	8.5346	28.3538
ENSONIG00000001696	ENSONIG00000001696	impdh2	GL831166.1:307884-325822		8.28106	117.424	8.18511	4.59686	59.0693	86.3889	56.9831	23.7941
ENSONIG00000001697	ENSONIG00000001697	golt1bb	GL831328.1:1317802-1325483		8.41662	14.2707	3.25343	12.5964	2.96256	22.0381	15.6309	13.5825
ENSONIG00000001698	ENSONIG00000001698	gys2	GL831328.1:1337843-1351456		0.0849667	0.444591	0.0797193	112.585	0.375589	126.426	17.1642	0
ENSONIG00000001699	ENSONIG00000001699	dalrd3	GL831166.1:339440-347006		10.7773	2.2687	0.916243	1.70276	6.64729	7.43626	2.14041	3.6795
ENSONIG00000001700	ENSONIG00000001700	pex5la	GL831140.1:221455-277442		0.0909335	0.440954	0	0	0.191687	0	0	0.125811
ENSONIG00000001701	ENSONIG00000001701	celsr3	GL831166.1:387454-501904		1.80741	0.0892373	0.181021	0.313773	1.19367	0.114831	0.058569	1.78122
ENSONIG00000001702	ENSONIG00000001702	-	GL831149.1:5363874-5374552		1.91289	3.51123	0.684951	3.94734	3.15277	0.795018	9607.82	0.082572
ENSONIG00000001703	ENSONIG00000001703	ABR	GL831223.1:6073-79927		36.3475	6.85789	3.18306	0.823698	10.2214	5.59497	2.45667	12.4663
ENSONIG00000001704	ENSONIG00000001704	KISS2	GL831328.1:1353903-1355714		0.599353	0.998208	0	0	2.64987	1.45221	0	0
ENSONIG00000001705	ENSONIG00000001705	ldhba	GL831328.1:1356076-1366470		329.392	6169.38	290.807	49.4491	107.024	217.454	99.2946	1775.55
ENSONIG00000001706	ENSONIG00000001706	GP5	GL831140.1:396224-400385		0.763068	6.5857	1.72935	0.188277	0.0855328	0	0.871126	14.0695
ENSONIG00000001707	ENSONIG00000001707	-	GL831140.1:401917-403185		0	0	0.110796	0	1.69521	0.486441	1.41039	1.48122
ENSONIG00000001708	ENSONIG00000001708	CCDC50	GL831140.1:406493-423319		17.4734	10.0552	4.94506	5.22636	13.5628	4.74313	4.14095	14.5231
ENSONIG00000001709	ENSONIG00000001709	-	GL831140.1:433808-434800		0.664511	0	0	0	0.496672	0	0	0
ENSONIG00000001710	ENSONIG00000001710	esr2b	GL831232.1:519071-548925		0.163636	0	13.1244	19.3301	4.95626	0.321903	0	0.133163
ENSONIG00000001711	ENSONIG00000001711	-	GL831140.1:440621-442850		0.136078	0	0.0443652	5.49625	1.17192	1.35904	0	0.0890506
ENSONIG00000001712	ENSONIG00000001712	slc25a3b	GL831328.1:1374849-1381018		333.891	2511.71	321.791	326.18	173.808	419.237	912.196	591.677
ENSONIG00000001713	ENSONIG00000001713	aspa	GL831223.1:124511-135033		21.5271	11.4626	81.1505	10.149	10.9311	13.2653	3.80091	4.68476
ENSONIG00000001714	ENSONIG00000001714	leprel1	GL831140.1:445209-495059		2.04993	7.48461	1.27721	2.017	4.46937	5.69617	3.7658	0.466343
ENSONIG00000001715	ENSONIG00000001715	C11orf54	GL831223.1:174076-176851		3.86011	22.439	57.7771	37.7706	6.24553	18.4745	6.60771	13.1797
ENSONIG00000001716	ENSONIG00000001716	wdr6	GL831166.1:512008-517808		1.0585	0.316409	0.620673	0.745304	9.03651	1.63351	0.665745	2.07704
ENSONIG00000001717	ENSONIG00000001717	akap10	GL831223.1:177562-194834		15.8834	10.3495	2.87992	1.00128	11.8578	1.66988	2.13664	12.1192
ENSONIG00000001718	ENSONIG00000001718	slc26a6	GL831166.1:551326-570701		0.0752961	0	77.1328	0.397956	30.1286	0.175038	0.14511	0.121152
ENSONIG00000001719	ENSONIG00000001719	ak7b	GL831432.1:23601-46963		3.47864	0.423587	4.05005	0.272193	18.6468	0.382465	0	0.270351
ENSONIG00000001720	ENSONIG00000001720	CCDC181	GL831140.1:445209-495059		1.15769	0.824692	2.74553	0.806344	18.2624	1.02593	0.365338	0.179243
ENSONIG00000001721	ENSONIG00000001721	cpox	GL831140.1:502187-507200		10.8837	21.9772	10.1088	10.7716	15.0905	29.7978	5.77666	201.435
ENSONIG00000001722	ENSONIG00000001722	syne2b	GL831232.1:552988-674318		0.436064	0.170422	0.05355	0.102424	0.109717	0.0926979	3.11978	0.0339218
ENSONIG00000001723	ENSONIG00000001723	SPATA22	GL831223.1:302593-310553		6.00402	0.478847	0.337246	0.262496	17.8739	0.17666	0.12508	0.883074
ENSONIG00000001724	ENSONIG00000001724	PRRG1	GL831140.1:509021-511467		42.0954	38.9752	3.79154	9.52042	17.4508	8.97184	3.23074	0.999099
ENSONIG00000001725	ENSONIG00000001725	stip1	GL831223.1:316111-320015		19.4307	20.5323	8.54264	5.57269	58.2434	25.2696	68.3452	51.9292
ENSONIG00000001726	ENSONIG00000001726	TMEM47 (1 of 2)	GL831140.1:517125-521710		55.5236	8.91571	0.305242	0	8.46353	0.225709	1.90801	1.11781
ENSONIG00000001727	ENSONIG00000001727	zgc:109986	GL831432.1:79373-117129		7.00078	10.3564	1.19169	1.89988	6.08933	9.09797	10.5518	7.50172
ENSONIG00000001728	ENSONIG00000001728	tab3	GL831140.1:522578-532045		19.6858	11.5807	3.0187	2.40012	25.5047	19.7764	9.32771	8.16622
ENSONIG00000001729	ENSONIG00000001729	slc3a2b	GL831432.1:119383-125936		64.8439	0.641538	0.0615122	0	2.60552	0.0369246	0.662597	0.043043
ENSONIG00000001730	ENSONIG00000001730	nexn	GL831140.1:537144-546223		2.78479	173.737	0.0849771	0.64795	3.58347	0.344975	195.759	0.0705408
ENSONIG00000001731	ENSONIG00000001731	rps6ka4	GL831223.1:321580-333435		10.521	6.2705	3.60855	3.05249	21.9581	0.262105	2.4719	24.7033
ENSONIG00000001732	ENSONIG00000001732	MYH13 (1 of 6)	GL831149.1:5403889-5407863		0.283557	0.233206	0.0887442	0.229997	1.40241	0.0627744	2259.97	0
ENSONIG00000001733	ENSONIG00000001733	mamdc1	GL831432.1:299282-491593		1.94754	0.135628	0.0305246	0	1.33336	0	0	0.0921074
ENSONIG00000001734	ENSONIG00000001734	FAM188B	GL831140.1:552190-562053		23.6138	4.76367	2.83029	2.81976	28.9699	2.74184	3.22253	3.22576
ENSONIG00000001735	ENSONIG00000001735	-	GL831149.1:5412127-5414877		2.43956	1.69829	0.707294	0.74862	3.2227	0.464575	5671.43	0.040796
ENSONIG00000001736	ENSONIG00000001736	-	GL831149.1:5427711-5430755		1.15725	6.27623	0.719865	5.12651	2.93001	0.66259	14959.5	0
ENSONIG00000001737	ENSONIG00000001737	-	GL831149.1:5435994-5438828		5.02693	8.86022	2.37536	11.1341	6.91992	2.80549	11501.6	0
ENSONIG00000001738	ENSONIG00000001738	zfpl1	GL831223.1:425081-430273		20.1807	29.444	10.768	17.1254	55.437	21.6638	19.0455	36.4748
ENSONIG00000001739	ENSONIG00000001739	MYH13 (2 of 6)	GL831149.1:5559431-5570033		0.997819	1.98828	0.401524	1.4962	1.37292	0.552025	5601.36	0.0149012
ENSONIG00000001740	ENSONIG00000001740	FAM150A	GL831140.1:566894-575073		0.535087	5.33899	1.27382	0.482607	4.81364	0.130285	3.16138	0.341923
ENSONIG00000001741	ENSONIG00000001741	IQCA1	GL831140.1:576716-584448		0.372445	0.608863	4.05111	0	21.2688	0.0551245	0.119267	0
ENSONIG00000001742	ENSONIG00000001742	rom1a	GL831223.1:444222-448135		0.463872	326.638	0.0696347	0.721828	0.67117	0.471529	1.60071	0
ENSONIG00000001743	ENSONIG00000001743	dhrs13a.2	GL831432.1:519642-524543		0.313674	3.7037	0.359722	0	2.10625	1.76813	1.09416	0
ENSONIG00000001744	ENSONIG00000001744	frmd8	GL831223.1:451852-462612		10.0743	11.5088	5.00719	5.99419	31.0138	13.922	6.69975	20.465
ENSONIG00000001745	ENSONIG00000001745	-	GL831140.1:590670-605447		0.0403693	0	0	0	0.0865754	0	0.0721001	0.0129994
ENSONIG00000001746	ENSONIG00000001746	gphb5	GL831232.1:692842-697669		0	0.316061	0	0	0	2.84285	0.370026	0
ENSONIG00000001747	ENSONIG00000001747	obscn	GL831140.1:611077-626000		1.37769	0.219256	0.0581831	0.0426126	1.3132	0.111732	11.8147	0.613327
ENSONIG00000001748	ENSONIG00000001748	kcnh5b	GL831232.1:718103-899474		0.2609	0	0	0	0.217606	0	0	0
ENSONIG00000001749	ENSONIG00000001749	-	GL831432.1:602718-624052		25.4354	14.4961	6.36208	5.12134	25.1355	17.5411	7.08509	18.8386
ENSONIG00000001750	ENSONIG00000001750	guk1b	GL831140.1:627027-631870		0	15.3178	0	0	1.68571	0	0	0
ENSONIG00000001751	ENSONIG00000001751	vps51	GL831223.1:462810-469799		12.7133	7.67505	3.35039	1.67125	6.97054	14.8903	5.32271	9.19558
ENSONIG00000001752	ENSONIG00000001752	ppp2r5ea	GL831232.1:920243-961481		26.593	28.4339	12.9546	10.8103	30.0659	4.82212	41.5051	55.6378
ENSONIG00000001753	ENSONIG00000001753	rnf220b	GL831140.1:633282-661278		0.424525	0.114656	0	0	0.461744	0.0234307	0	0.0122644
ENSONIG00000001754	ENSONIG00000001754	tm7sf2	GL831223.1:470850-479747		6.89687	7.32255	4.1134	191.042	5.32393	0	0.333286	0.569012
ENSONIG00000001755	ENSONIG00000001755	cnih2	GL831223.1:489059-499441		14.9265	0	0	0	0.209841	0	0	0
ENSONIG00000001756	ENSONIG00000001756	dmap1	GL831140.1:682570-687824		18.3091	8.83012	5.40061	7.17608	45.2488	39.4165	13.1413	24.3553
ENSONIG00000001757	ENSONIG00000001757	slc8a4a	GL831223.1:517471-540599		75.5797	0.186017	0	0	0.396996	0.0220379	0.0980182	0
ENSONIG00000001758	ENSONIG00000001758	hnrnpm	GL831140.1:687842-695286		59.8541	44.2529	18.5773	17.5768	58.34	17.7002	25.2655	101.456
ENSONIG00000001759	ENSONIG00000001759	mgll	GL831166.1:575580-606072		3.12977	2.1853	0.774965	1.21487	0.739763	0	1.37953	1.87825
ENSONIG00000001760	ENSONIG00000001760	prkar2aa	GL831166.1:617399-658763		31.5971	45.1273	14.2655	2.65173	46.4807	8.5119	17.7083	70.9233
ENSONIG00000001761	ENSONIG00000001761	-	GL831432.1:647905-662204		228.08	320.916	115.795	166.622	114.088	100.993	124.004	236.905
ENSONIG00000001762	ENSONIG00000001762	si:dkey-175m17.7	GL831223.1:565934-571186		0	0	0	0	0.0957483	0	0	0
ENSONIG00000001763	ENSONIG00000001763	sgpp1	GL831232.1:982339-1010505		1.83805	3.43479	1.40641	1.82502	31.883	0.105045	0.653517	4.49479
ENSONIG00000001764	ENSONIG00000001764	syt16	GL831232.1:1025587-1058884		0.634997	0	0.0270878	0.135727	4.71598	0	0	0.0179372
ENSONIG00000001765	ENSONIG00000001765	snapc1b	GL831232.1:1059215-1063791		3.5577	4.74853	1.65345	3.59228	8.81188	10.9321	3.07154	8.90974
ENSONIG00000001766	ENSONIG00000001766	gng3	GL831223.1:584837-587283		519.223	0	0	34.2179	18.1092	0	0	0
ENSONIG00000001767	ENSONIG00000001767	banf1	GL831223.1:590212-590905		336.542	218.495	60.5857	69.5006	842.428	464.728	527.351	145.416
ENSONIG00000001768	ENSONIG00000001768	prdx5	GL831223.1:592308-594761		156.051	265.243	69.3492	42.073	84.7425	86.4755	148.785	217.163
ENSONIG00000001769	ENSONIG00000001769	NAT6	GL831166.1:664570-665380		0.325352	0	0.814041	0.46039	6.96435	0.346629	3.88557	3.98163
ENSONIG00000001770	ENSONIG00000001770	-	GL832206.1:7107-8117		67.5646	5.27706	10.9057	4921.74	11.3131	1.82755	0	0.638405
ENSONIG00000001771	ENSONIG00000001771	hyal3	GL831166.1:667250-669157		1.6157	2.0265	0.793976	0.201179	4.2084	0.475161	0.477694	17.2922
ENSONIG00000001772	ENSONIG00000001772	timm44	GL831140.1:696148-702635		4.53067	6.19365	1.85524	4.20845	11.2582	12.7442	5.19796	10.2218
ENSONIG00000001773	ENSONIG00000001773	yipf6	GL831232.1:1065031-1068929		16.5461	15.1238	4.0104	9.57945	8.3668	18.524	7.74655	9.44483
ENSONIG00000001774	ENSONIG00000001774	-	AERX01073953.1:1353-3202		0.377658	0.918902	0.409152	0.843087	0.810367	1.38633	0	3.50951
ENSONIG00000001775	ENSONIG00000001775	im:7136021 (1 of 4)	GL831232.1:1074496-1078962		3.0341	3.50717	0.629585	0.17991	11.5154	5.96603	2.6815	3.16503
ENSONIG00000001776	ENSONIG00000001776	dtd2	GL831232.1:1095921-1099354		4.60259	4.7179	1.71546	2.29443	2.67282	29.545	2.03159	14.0899
ENSONIG00000001777	ENSONIG00000001777	-	GL831140.1:741461-804368		0.551366	8.49694	1.01049	0.473151	2.43678	0.167705	0.535787	1.4733
ENSONIG00000001778	ENSONIG00000001778	esrra	GL831223.1:609983-626683		9.70744	36.7747	11.8318	2.40656	12.8285	5.85313	3.03554	7.85963
ENSONIG00000001779	ENSONIG00000001779	nubpl	GL831232.1:1115354-1124470		9.33459	8.2308	2.38388	3.70911	13.56	4.16742	6.11282	10.898
ENSONIG00000001780	ENSONIG00000001780	CLDND1 (1 of 2)	GL831497.1:39450-45639		33.4267	8.02152	0.0444545	0	5.48435	0.585047	2.07944	0.128575
ENSONIG00000001781	ENSONIG00000001781	amt	GL831166.1:675137-681893		5.90893	5.04542	14.055	36.4925	9.33201	8.40053	3.49325	4.18241
ENSONIG00000001782	ENSONIG00000001782	ACY3 (1 of 2)	GL831497.1:49410-52775		1.29008	0	0.0332123	0	0.078261	0	0	0.0279774
ENSONIG00000001783	ENSONIG00000001783	KCNK4 (1 of 2)	GL831223.1:632752-640716		0	0	0.175921	0	0	0	1.03668	0
ENSONIG00000001784	ENSONIG00000001784	OSBP (1 of 2)	GL831497.1:53698-66961		15.2008	20.6808	6.76265	33.5578	21.2892	7.52024	41.1808	15.474
ENSONIG00000001785	ENSONIG00000001785	arhgap5	GL831232.1:1160493-1212360		7.03756	6.79203	1.92767	1.45353	9.10804	0.477822	4.74251	2.25197
ENSONIG00000001786	ENSONIG00000001786	ifrd2	GL831166.1:689461-693056		4.5298	6.36216	1.89285	4.30126	12.8475	23.2993	7.70812	13.6326
ENSONIG00000001787	ENSONIG00000001787	adssl	GL831223.1:647004-655023		31.3288	75.3745	31.4793	20.9462	32.8196	13.8397	7.64921	77.2723
ENSONIG00000001788	ENSONIG00000001788	-	GL831166.1:696284-702574		5.98114	6.11297	1.67158	1.95588	6.35481	1.2617	1.46302	5.15624
ENSONIG00000001789	ENSONIG00000001789	akap6	GL831232.1:1241285-1433737		11.0584	0.404119	0.00419818	0	0.33998	0.0212592	0.0994228	0.0225119
ENSONIG00000001790	ENSONIG00000001790	coro1b	GL831497.1:71056-80543		20.3157	11.367	4.72131	3.83979	12.3215	5.33416	1.46673	13.3265
ENSONIG00000001791	ENSONIG00000001791	KIF4A	GL831223.1:665132-683276		0.292181	1.40632	1.30329	0.68593	18.3033	10.6304	3.04622	39.702
ENSONIG00000001792	ENSONIG00000001792	SEMA3B	GL831166.1:814325-839224		3.0093	3.54383	0.7806	1.34149	1.49919	1.06578	3.48624	0.0995953
ENSONIG00000001793	ENSONIG00000001793	DTX4 (1 of 2)	GL831497.1:88345-101010		9.84593	0.693498	0.271817	0.281963	8.59177	0.135629	0.332763	1.16791
ENSONIG00000001794	ENSONIG00000001794	MSANTD1	GL831497.1:105726-108628		1.71641	0.727739	0.45915	0	4.00183	0.216945	0	0.324288
ENSONIG00000001795	ENSONIG00000001795	cers4a	GL831140.1:842256-854334		34.5507	13.6969	0.952618	0.320888	2.70525	4.28283	0.913389	2.71893
ENSONIG00000001796	ENSONIG00000001796	rgs12a	GL831497.1:111454-153925		18.8027	0.597311	0.686539	0.45866	16.5122	2.94912	0.88032	0.804826
ENSONIG00000001797	ENSONIG00000001797	HGFAC	GL831497.1:155192-174211		1.04904	3.05085	1.55889	0.283868	0.720235	0	0.762374	3.61292
ENSONIG00000001798	ENSONIG00000001798	ammecr1	GL831223.1:690360-700685		0.806947	1.42579	0.623678	0.31401	4.14991	1.30385	0.70877	2.96691
ENSONIG00000001799	ENSONIG00000001799	NPAS3	GL831232.1:1732017-1787665		0.883515	0	0	0	0.169157	0.0215385	0	0
ENSONIG00000001800	ENSONIG00000001800	-	GL831140.1:857282-859261		0.388231	2.13821	0	0	1.72822	1.154	2.27663	0
ENSONIG00000001801	ENSONIG00000001801	lsm7	GL831140.1:859555-861029		121.998	111.604	41.8377	52.7952	342.786	252.548	115.646	194.305
ENSONIG00000001802	ENSONIG00000001802	TMEM164	GL831223.1:716038-735811		9.97979	3.71127	2.0705	0.481073	23.34	2.07061	0.816251	28.0657
ENSONIG00000001803	ENSONIG00000001803	-	GL831140.1:863528-869102		0.173938	0	0.0527916	0	0.725818	0.461043	0	0
ENSONIG00000001804	ENSONIG00000001804	gabra3	GL831223.1:756342-823385		9.36351	0.555218	1.03403	0	2.58406	1.85238	0.29307	0.0430813
ENSONIG00000001805	ENSONIG00000001805	-	GL831140.1:869804-873743		0	0	0	0	0	0.719589	0	0
ENSONIG00000001806	ENSONIG00000001806	timm13	GL831140.1:869804-873743		8.94881	15.0203	5.32117	3.849	15.8862	42.4828	16.2896	18.8578
ENSONIG00000001807	ENSONIG00000001807	egln3	GL831232.1:1816100-1824699		7.84121	13.4226	18.4546	4.01969	15.4689	6.81858	3.46896	18.8812
ENSONIG00000001808	ENSONIG00000001808	enc3	GL831140.1:877587-890778		8.64405	51.5639	4.65731	4.40125	10.7945	2.91591	1.03685	4.04566
ENSONIG00000001809	ENSONIG00000001809	eapp	GL831232.1:1843734-1848788		13.3793	12.1497	4.06864	10.5942	20.4479	22.252	12.5981	11.588
ENSONIG00000001810	ENSONIG00000001810	arhgef18b	GL831140.1:908171-920364		1.19303	1.17019	1.00754	1.42103	5.13247	5.59392	2.13766	7.86483
ENSONIG00000001811	ENSONIG00000001811	insrb	GL831140.1:955263-1026089		0.0371683	0.546687	0.0452842	0.110715	2.09803	0.518791	0.122364	1.15918
ENSONIG00000001812	ENSONIG00000001812	DOK7 (1 of 2)	GL831497.1:176064-220456		0.293165	5.03946	0.127593	1.31104	9.4274	0.879534	4.45757	0
ENSONIG00000001813	ENSONIG00000001813	si:dkey-169l5.3	GL831223.1:913078-961681		8.08697	0.263844	0	0	1.15224	0.256623	0	0
ENSONIG00000001814	ENSONIG00000001814	PRKD1	GL831232.1:1964055-2034090		3.05227	0	0	0	0.325292	0	0.0780296	0
ENSONIG00000001815	ENSONIG00000001815	si:ch73-134f24.1	GL831497.1:290992-294792		0.936299	0.23778	0.0423869	0	1.85961	0.359293	0	0.0387832
ENSONIG00000001816	ENSONIG00000001816	HMX1	GL831497.1:313104-316636		0.308803	1.44077	0	0	0.118768	0	0.150344	0
ENSONIG00000001817	ENSONIG00000001817	hmx4 (1 of 2)	GL831497.1:317113-319047		0.236018	1.6773	0	0	0.431422	0.0961119	0	0
ENSONIG00000001818	ENSONIG00000001818	CPZ (1 of 2)	GL831497.1:359015-368637		2.12792	4.8495	2.20701	0.503719	1.5531	0.0850293	4.32288	1.78797
ENSONIG00000001819	ENSONIG00000001819	sema3bl	GL831166.1:863063-920200		0.896737	0.485821	0.0428592	0	1.61308	0.165546	0.599638	1.62403
ENSONIG00000001820	ENSONIG00000001820	VSIG1	GL831223.1:976628-982162		0.488527	0	0	0.271213	0	0	0	0
ENSONIG00000001821	ENSONIG00000001821	GPR78 (1 of 2)	GL831497.1:372320-380302		9.17854	0.349007	0	0	0.0643298	0	0	0
ENSONIG00000001822	ENSONIG00000001822	trmt44	GL831497.1:411637-429720		4.30693	3.29865	1.12279	1.59287	6.29715	5.17335	2.25991	5.08645
ENSONIG00000001823	ENSONIG00000001823	tmlhe	GL831223.1:983414-1004119		2.72306	0.325945	31.68	0.282911	4.24598	30.1121	3.76876	0.0424
ENSONIG00000001824	ENSONIG00000001824	tnk1	GL831497.1:443988-458965		0.460141	2.03647	2.18057	0.837963	3.64449	9.94035	0.695752	0.91524
ENSONIG00000001825	ENSONIG00000001825	mpp1	GL831223.1:1015317-1027973		19.1054	23.8637	12.9658	17.6484	9.83096	21.1298	82.335	33.8871
ENSONIG00000001826	ENSONIG00000001826	naf1	GL831884.1:42893-57376		11.4102	17.0948	4.37214	9.09346	37.6852	48.8526	13.9051	23.3837
ENSONIG00000001827	ENSONIG00000001827	PCOLCE (1 of 2)	GL831223.1:1040763-1047922		9.79999	110.692	43.4595	13.829	12.1702	9.05459	17.5633	49.9857
ENSONIG00000001828	ENSONIG00000001828	SPTBN5	GL831232.1:2295760-2406165		0.0852839	0	1.42316	0.0892832	0.213081	0.00558205	0	0.0683509
ENSONIG00000001829	ENSONIG00000001829	use1	GL831140.1:1050823-1059184		12.3259	8.34945	2.46151	2.79779	39.0682	44.8161	22.0452	13.8955
ENSONIG00000001830	ENSONIG00000001830	MYO9B (1 of 2)	GL831140.1:1069594-1115503		1.17076	1.5288	0.829575	0.994805	9.10658	0.33732	0.319343	14.174
ENSONIG00000001831	ENSONIG00000001831	-	GL831378.1:128155-130021		0	0	0.0562405	0	0	0	0	0.115406
ENSONIG00000001832	ENSONIG00000001832	-	GL831140.1:1125082-1126270		5.75512	14.8007	15.7062	3.70787	1.00205	0.723013	1.17942	431.427
ENSONIG00000001833	ENSONIG00000001833	ncl1	GL831140.1:1212313-1226509		12.2625	5.88752	3.45624	8.64546	13.8039	14.8396	20.5689	22.7914
ENSONIG00000001834	ENSONIG00000001834	-	GL831378.1:260864-262273		3.76393	9.93043	3.35507	2.20958	4.07272	0.981836	2.95194	71.5341
ENSONIG00000001835	ENSONIG00000001835	tmem88a	GL831223.1:1049667-1050704		30.5782	113.653	3.33125	4.42204	2.18628	1.14078	2.61578	5.34595
ENSONIG00000001836	ENSONIG00000001836	-	GL831378.1:822722-824469		0	0	0.0647533	0	0	0.103917	0	0.138063
ENSONIG00000001837	ENSONIG00000001837	kdm6bb	GL831223.1:1060231-1074497		29.1022	25.4151	0.925001	0.733659	2.58559	0.281555	2.50283	19.1851
ENSONIG00000001838	ENSONIG00000001838	-	GL831378.1:902741-903618		0	0.68041	0.110661	0	0.308308	0	0	0.823205
ENSONIG00000001839	ENSONIG00000001839	-	GL831378.1:919272-920984		0	0	0.0609494	0	0.961415	0	0	0
ENSONIG00000001840	ENSONIG00000001840	-	GL831378.1:943230-962717		2.26562	4.26695	0.421473	0.428867	1.1019	0.0579091	0	1.12234
ENSONIG00000001841	ENSONIG00000001841	-	GL831166.1:966555-972482		2.18907	1.79486	4.35688	1.60955	1.11598	0.279612	0.358908	5.27414
ENSONIG00000001842	ENSONIG00000001842	ENDOD1 (6 of 22)	GL831223.1:1083636-1084752		0	0	1.82575	0.400633	0	0.202865	0	1.40159
ENSONIG00000001843	ENSONIG00000001843	nlgn2b	GL831223.1:1092980-1131103		6.52007	0.214284	0	0	1.38677	0.0662599	0.10663	0.0123156
ENSONIG00000001844	ENSONIG00000001844	actr8	GL831166.1:1020786-1028905		2.50785	1.14253	0.531567	0.411915	5.21046	1.97144	0.713602	3.67399
ENSONIG00000001845	ENSONIG00000001845	cers1	GL831140.1:1231466-1262427		23.8969	6.91728	3.95461	5.3479	20.3274	0.502473	0.361488	13.7596
ENSONIG00000001846	ENSONIG00000001846	selk	GL831166.1:1020786-1028905		57.2096	75.5836	19.2543	28.5818	57.3706	22.6298	195.648	69.7475
ENSONIG00000001847	ENSONIG00000001847	cope	GL831140.1:1263834-1271834		98.7582	64.4058	24.8714	61.7102	83.0324	63.0809	45.68	128.042
ENSONIG00000001848	ENSONIG00000001848	chdh	GL831166.1:1040954-1047599		2.08258	1.82363	11.4339	7.39479	7.55934	0.293851	0.349655	12.5225
ENSONIG00000001849	ENSONIG00000001849	EHD4	GL831232.1:2409908-2459291		7.23642	77.9156	11.7847	7.82128	8.08104	5.12289	7.89227	44.7277
ENSONIG00000001850	ENSONIG00000001850	CACNA1D (1 of 2)	GL831166.1:1052840-1130784		1.57496	0.482784	0	0.91276	0.385471	0.829031	0.0498003	0.00759539
ENSONIG00000001851	ENSONIG00000001851	-	GL831327.1:5602-30353		12.9392	0.594623	0.245159	0.134774	10.4305	4.02667	0.97673	1.5164
ENSONIG00000001852	ENSONIG00000001852	tnfaip8	GL831140.1:1289444-1294482		3.48972	16.7733	4.00217	4.38256	14.9863	24.7077	10.0427	6.87557
ENSONIG00000001853	ENSONIG00000001853	stxbp2	GL831149.1:5577381-5586384		9.19023	26.0043	27.8104	15.1513	56.1331	19.4079	4.36441	78.1618
ENSONIG00000001854	ENSONIG00000001854	C19orf10	GL831140.1:1312151-1323759		14.1065	28.3572	14.77	84.8186	45.9917	28.0999	21.5228	111.436
ENSONIG00000001855	ENSONIG00000001855	fgf11b	GL831223.1:1183860-1217114		0.713101	0	0	0	0.694853	0	0	0
ENSONIG00000001856	ENSONIG00000001856	cldn7b	GL831223.1:1235667-1239489		0.125691	0.238989	58.3011	4.05141	6.31213	96.3625	10.9564	2.11363
ENSONIG00000001857	ENSONIG00000001857	g2e3	GL831232.1:2462395-2477935		0.712611	2.38288	0.81793	0.526403	19.3942	2.47448	1.39261	16.8685
ENSONIG00000001858	ENSONIG00000001858	farp1	GL831327.1:71617-105382		7.17374	5.67757	7.47108	2.44253	2.22191	4.08117	1.80084	4.44397
ENSONIG00000001859	ENSONIG00000001859	loxl5a	GL831140.1:1330876-1335093		0.160201	0	0	0	0.111516	0.0590554	0.282642	0.241456
ENSONIG00000001860	ENSONIG00000001860	npm1a	GL831223.1:1242837-1247804		16.739	34.2232	18.9352	23.7363	97.5305	177.225	48.7502	107.629
ENSONIG00000001861	ENSONIG00000001861	mibp	GL831140.1:1341939-1345347		11.6417	202.985	16.7417	3.65582	45.1625	138.162	21.7716	170.997
ENSONIG00000001862	ENSONIG00000001862	sly1	GL831232.1:2480358-2515713		22.5283	24.2998	14.6282	18.6696	43.6967	13.3866	12.9319	27.1842
ENSONIG00000001863	ENSONIG00000001863	-	GL831327.1:107929-115755		0	1.3112	1.70369	0	1.17182	0	0	24.5881
ENSONIG00000001864	ENSONIG00000001864	arl13b	GL831327.1:159847-168406		8.03887	6.13339	3.67318	2.27073	13.5347	1.42891	2.61324	2.48414
ENSONIG00000001865	ENSONIG00000001865	kcnip1b	GL831223.1:1250745-1259816		97.5305	3.06781	0.675698	0	0.900709	0.266299	0	0.176721
ENSONIG00000001866	ENSONIG00000001866	NCAM2	GL831327.1:710714-831868		9.00535	0.550066	0.0775703	0.200002	1.25373	0.0502314	3.34235	0.0662497
ENSONIG00000001867	ENSONIG00000001867	brd4	GL831149.1:5592766-5627306		11.0072	13.1041	4.85987	4.53567	21.4218	1.64791	6.06317	16.2619
ENSONIG00000001868	ENSONIG00000001868	atcaya	GL831140.1:1348088-1360739		98.1539	0.853715	0.0713361	2.0243	4.06992	0.258504	0.103314	0.0384356
ENSONIG00000001869	ENSONIG00000001869	HRH2 (1 of 2)	GL831223.1:1280390-1288238		0	0	17.1826	0	1.31978	0.043562	0	0.0386899
ENSONIG00000001870	ENSONIG00000001870	-	GL831223.1:1319978-1364063		54.2811	3.50489	0.451724	0.057465	3.74905	0.054095	0.529551	4.1156
ENSONIG00000001871	ENSONIG00000001871	zfr2	GL831140.1:1361426-1382681		10.526	7.32066	1.93161	4.32151	10.6256	2.73361	9.27497	4.25146
ENSONIG00000001872	ENSONIG00000001872	pcdh1a	GL831223.1:1472736-1565592		12.1237	0.369988	0	0.594284	0.848808	0.0619559	0	0
ENSONIG00000001873	ENSONIG00000001873	ROBO2 (1 of 2)	GL831223.1:1648100-1729587		9.08907	0.629991	0.0243818	0.166292	0.896605	0.0790252	0.047119	0
ENSONIG00000001874	ENSONIG00000001874	lpar2a	GL831149.1:5631252-5636310		1.79135	6.22019	0.663163	0	3.99734	166.68	10.7159	0.0403787
ENSONIG00000001875	ENSONIG00000001875	pbx4	GL831149.1:5639655-5663660		7.63906	4.81264	1.5116	0.66936	8.07728	2.7744	3.38027	5.04183
ENSONIG00000001876	ENSONIG00000001876	gart	GL831327.1:978946-992511		1.65582	1.5346	0.408645	7.0229	23.0914	17.9805	2.5171	3.55384
ENSONIG00000001877	ENSONIG00000001877	atp13a	GL831149.1:5669760-5680752		7.86547	5.44293	2.47239	3.14097	14.5864	10.5667	4.30551	13.7912
ENSONIG00000001878	ENSONIG00000001878	matk	GL831140.1:1386752-1395770		2.94972	2.66418	1.01829	0.254309	2.41633	0.140103	0.599909	10.7901
ENSONIG00000001879	ENSONIG00000001879	coch	GL831232.1:2528555-2546248		5.48507	8.55262	0.632658	0.0774493	0.255097	0.0446073	0.186413	13.8238
ENSONIG00000001880	ENSONIG00000001880	CHCHD5	GL831149.1:5681211-5699545		0.740852	1.401	0.309885	0	2.35418	2.19585	1.25282	2.32644
ENSONIG00000001881	ENSONIG00000001881	-	GL831149.1:5681211-5699545		8.60666	2.86762	3.51464	0	2.38895	2.60256	1.03549	1.26246
ENSONIG00000001882	ENSONIG00000001882	n6amt1	GL831327.1:978946-992511		13.8538	12.1404	2.46335	6.81388	36.3754	30.9388	22.4495	9.43739
ENSONIG00000001883	ENSONIG00000001883	rx2	GL831140.1:1401772-1411346		0.35617	2.66907	0.0487897	0	0.632202	0	0	0.214077
ENSONIG00000001884	ENSONIG00000001884	strn3	GL831232.1:2552774-2579674		3.26009	5.51132	0.560045	0.339809	6.63204	0.864266	4.19042	7.60519
ENSONIG00000001885	ENSONIG00000001885	gmip	GL831149.1:5699734-5712361		3.59646	7.37045	4.88333	1.05789	1.91506	0.665814	9.38628	51.3191
ENSONIG00000001886	ENSONIG00000001886	-	GL831140.1:1418332-1427532		10.9147	8.90263	2.53328	26.9122	13.8817	31.7338	9.01183	12.7051
ENSONIG00000001887	ENSONIG00000001887	-	GL831327.1:1006233-1008999		0	0	0	0	0	0	0	0
ENSONIG00000001888	ENSONIG00000001888	-	GL831327.1:1019260-1020804		0	0	0	0	0	0	0	0
ENSONIG00000001889	ENSONIG00000001889	-	GL831327.1:1027244-1029796		0.687066	0	0	0	0.0925442	0	0	0
ENSONIG00000001890	ENSONIG00000001890	-	GL831327.1:1047160-1064415		6.7163	2.26151	0.397237	5.91398	0.539551	0.0994637	0.610666	2.03373
ENSONIG00000001891	ENSONIG00000001891	znf654	GL831327.1:1070212-1087243		0.606942	0.473544	0.106546	0.0938442	4.12822	0.679977	1.06903	3.31604
ENSONIG00000001892	ENSONIG00000001892	haus5	GL831140.1:1427571-1435539		0.886798	0.505718	0.464778	1.15279	9.8512	29.6147	2.36074	10.4622
ENSONIG00000001893	ENSONIG00000001893	colgalt1	GL831149.1:5712604-5723524		2.76248	7.70583	2.61606	1.76131	5.68736	1.85614	5.23096	16.6682
ENSONIG00000001894	ENSONIG00000001894	ROBO1 (1 of 2)	GL831223.1:1738113-1798403		3.95476	0.317894	0.349924	0	0.310149	0.049102	0	0.71787
ENSONIG00000001895	ENSONIG00000001895	cbsa	GL831327.1:1090033-1100714		26.6916	32.4699	4.01895	174.454	67.1921	23.8898	28.0283	5.43926
ENSONIG00000001896	ENSONIG00000001896	ap4s1	GL831232.1:2580524-2582355		8.92699	16.2948	2.0899	5.0108	15.3945	4.29589	17.3188	13.8841
ENSONIG00000001897	ENSONIG00000001897	dcp1a	GL831166.1:1135587-1146248		6.55497	7.4082	1.77564	2.51646	11.4069	1.57113	2.99356	5.75452
ENSONIG00000001898	ENSONIG00000001898	sin3b	GL831140.1:1436479-1452183		6.2154	4.19448	3.0099	4.35245	10.7344	2.48407	2.02544	8.12984
ENSONIG00000001899	ENSONIG00000001899	hectd1	GL831232.1:2583911-2625990		17.1905	27.1616	5.77351	8.29278	26.5755	10.8116	18.1645	28.1879
ENSONIG00000001900	ENSONIG00000001900	TKT (1 of 2)	GL831166.1:1147760-1160610		2.81725	7.32695	0.277803	27.1767	12.832	0.700847	0.350675	26.8264
ENSONIG00000001901	ENSONIG00000001901	pgls	GL831149.1:5712604-5723524		16.0067	11.5091	8.07147	9.07135	30.6927	53.8437	4.25424	42.1061
ENSONIG00000001902	ENSONIG00000001902	-	GL831149.1:5725438-5729268		0.671049	1.81523	0	0	2.97929	3.58944	0.693563	3.3204
ENSONIG00000001903	ENSONIG00000001903	-	GL831327.1:1102346-1112766		22.7887	13.2822	8.67943	11.1473	40.808	23.9427	25.68	46.6134
ENSONIG00000001904	ENSONIG00000001904	trim35-13	GL831149.1:5739014-5749682		0	0	0.0367841	0	0	0	24.8353	0
ENSONIG00000001905	ENSONIG00000001905	slc27a1a	GL831149.1:5739014-5749682		7.26464	8.0942	1.78975	3.87687	5.41801	11.7502	31.1891	7.50816
ENSONIG00000001906	ENSONIG00000001906	xpr1	GL831140.1:1455052-1543170		22.0591	19.0225	7.92236	3.13213	2.74316	0.086353	8.78109	1.68438
ENSONIG00000001907	ENSONIG00000001907	CD200 (1 of 2)	GL831327.1:1159229-1167150		6.16469	8.68666	1.62171	1.37387	4.40706	4.40449	1.292	1.34608
ENSONIG00000001908	ENSONIG00000001908	-	GL831327.1:1180922-1183605		0	0.677595	0.555743	0.675855	0.61373	2.16922	0	2.93611
ENSONIG00000001909	ENSONIG00000001909	-	GL831327.1:1185791-1188570		0	0	0	0	0	1.34932	0	0
ENSONIG00000001910	ENSONIG00000001910	-	GL831327.1:1192859-1194466		0.523246	0.9544	0.475071	0	0.414967	3.64044	0	6.77244
ENSONIG00000001911	ENSONIG00000001911	cyp4f3 (1 of 3)	GL831327.1:1272650-1282029		0.478303	0.839368	254.697	0	16.8991	1.13578	0.926352	0.25973
ENSONIG00000001912	ENSONIG00000001912	nsun5	GL831166.1:1167696-1170485		12.9376	20.9356	4.01176	7.17385	49.0909	62.5716	11.3612	15.3934
ENSONIG00000001913	ENSONIG00000001913	acbd6	GL831140.1:1545789-1577139		17.4597	13.8544	3.61962	5.73047	39.0831	104.968	14.5625	9.85096
ENSONIG00000001914	ENSONIG00000001914	CD97 (1 of 2)	GL831149.1:5769382-5773963		2.21215	15.2041	4.01875	1.49815	1.59757	0.753012	0.887071	81.369
ENSONIG00000001915	ENSONIG00000001915	sgk2a	GL831166.1:1187587-1202172		0.434054	17.4198	76.4066	3.04136	1.14781	0.0232686	0.312272	2.13635
ENSONIG00000001916	ENSONIG00000001916	ppm1db	GL831223.1:1836538-1846734		14.9264	4.51431	0.847615	0.89932	6.21269	2.28324	1.33664	6.69228
ENSONIG00000001917	ENSONIG00000001917	lhx4	GL831140.1:1583896-1595122		0.409352	1.1856	0.0130542	0.130992	1.96328	0.017623	0	0.0108727
ENSONIG00000001918	ENSONIG00000001918	heatr5a	GL831232.1:2638818-2694108		2.92099	2.63722	0.857328	1.12743	4.97304	3.16058	2.93654	3.69187
ENSONIG00000001919	ENSONIG00000001919	tbx2b	GL831223.1:1863269-1869150		0.0499354	0.552509	0.299487	0	0.561352	0	0	0
ENSONIG00000001920	ENSONIG00000001920	LPHN1	GL831149.1:5835820-5926234		9.01858	0.496787	0.0372016	0	6.36094	0.0136133	0.065028	0.0297549
ENSONIG00000001921	ENSONIG00000001921	qsox1	GL831140.1:1602736-1627461		2.63211	20.8435	1.46988	667.033	6.75256	8.04894	2.10131	5.38481
ENSONIG00000001922	ENSONIG00000001922	acaca	GL831223.1:1871361-1903051		22.1428	7.49228	1.53291	8.70292	9.72583	3.30277	1.87238	6.27597
ENSONIG00000001923	ENSONIG00000001923	l3mbtl1a	GL831166.1:1205824-1214424		10.1517	0	1.46347	0	1.06674	0.0410507	0.199171	0.399437
ENSONIG00000001924	ENSONIG00000001924	CEP350	GL831140.1:1628950-1660412		2.49305	5.14738	1.87405	1.2787	6.97052	0.568578	5.41694	6.43286
ENSONIG00000001925	ENSONIG00000001925	srsf6b (1 of 2)	GL831166.1:1223878-1227547		19.206	7.43571	6.65438	11.0323	20.6905	12.1424	14.832	50.1212
ENSONIG00000001926	ENSONIG00000001926	zgc:158309	GL831149.1:5949814-5964144		18.9394	67.1148	25.833	50.3765	10.3099	0.662236	9.95863	1.47559
ENSONIG00000001927	ENSONIG00000001927	eif2s2	GL831166.1:1228976-1233920		60.6575	78.8235	27.4425	48.1513	84.6224	33.3655	119.746	203.115
ENSONIG00000001928	ENSONIG00000001928	cacna1r	GL831140.1:1717660-1783563		5.08392	0.0800928	0.0299706	0	0.424069	0	0	0.0616114
ENSONIG00000001929	ENSONIG00000001929	cyp4f3 (2 of 3)	GL831327.1:1297119-1301769		0	0.215019	5.49775	0.202986	9.48323	0.373438	0.230748	0
ENSONIG00000001930	ENSONIG00000001930	-	GL831149.1:5980764-5983772		1.92489	11.5976	5.88201	1.04261	1.09267	0.646661	2.09801	17.6723
ENSONIG00000001931	ENSONIG00000001931	tmed1a	GL831149.1:5988203-5991442		0	0	4.0394	24.3799	0.409189	0	0	0.441413
ENSONIG00000001932	ENSONIG00000001932	chmp4b	GL831166.1:1238324-1242741		60.1678	35.4168	15.9087	11.678	41.8974	15.9954	54.4909	18.8028
ENSONIG00000001933	ENSONIG00000001933	dnm2a	GL831149.1:5994355-6023857		9.60537	9.97719	6.62773	6.68106	14.5596	5.96243	5.47618	29.9707
ENSONIG00000001934	ENSONIG00000001934	VAPB (1 of 2)	GL831166.1:1245243-1252171		23.1793	39.0217	11.4839	11.7461	19.2053	24.3824	47.8287	33.8829
ENSONIG00000001935	ENSONIG00000001935	-	GL831513.1:174319-175417		0.879504	0	0.387892	0.559555	1.21167	0.138087	0	0.174418
ENSONIG00000001936	ENSONIG00000001936	-	GL831327.1:1325579-1326781		0	0	0	0	0	0	0	0
ENSONIG00000001937	ENSONIG00000001937	-	GL831513.1:242199-243231		0.345249	0.686188	0.343654	0	0	0	0.647289	0.299744
ENSONIG00000001938	ENSONIG00000001938	-	GL831513.1:250943-253130		0.771201	0	0.462694	0	0.667912	0.317307	0	2.66207
ENSONIG00000001939	ENSONIG00000001939	cyp4f3 (3 of 3)	GL831327.1:1354262-1365537		1.56389	2.44855	5.49983	0.583713	0.841012	0.110302	0.35222	138.992
ENSONIG00000001940	ENSONIG00000001940	-	GL831513.1:261179-261953		0	0	0.352828	0	2.39104	0.556052	0	0.291915
ENSONIG00000001941	ENSONIG00000001941	-	GL831513.1:266244-270389		1.09453	2.09472	1.44955	1.46014	26.7648	4.45161	1.92704	44.1908
ENSONIG00000001942	ENSONIG00000001942	-	GL831513.1:366673-367916		0	0	0.157014	0	0	0.236279	0	0
ENSONIG00000001943	ENSONIG00000001943	GNAS (1 of 2)	GL831166.1:1255776-1280402		8.18307	4.13123	1.69316	1.38564	4.55256	5.79104	4.49398	10.2059
ENSONIG00000001944	ENSONIG00000001944	si:dkey-11f4.7	GL831166.1:1287884-1328390		0.684817	4.41584	1.41707	1.12902	2.24729	0.807209	1.54807	3.90254
ENSONIG00000001945	ENSONIG00000001945	qtrt1	GL831149.1:6024382-6028958		4.4817	1.9663	1.53474	1.59347	9.99545	44.7153	3.23709	8.52769
ENSONIG00000001946	ENSONIG00000001946	-	GL831149.1:6030985-6071875		11.7989	0.526021	0.0274427	0	2.34405	5.22439	0.537859	0.0297997
ENSONIG00000001947	ENSONIG00000001947	atp5e	GL831166.1:1287884-1328390		211.336	1812.45	258.97	242.212	241.863	227.943	426.805	149.295
ENSONIG00000001948	ENSONIG00000001948	lhx1b	GL831223.1:1915819-1919152		0.704229	0	0	0	0.177452	0	0	0
ENSONIG00000001949	ENSONIG00000001949	slmo2	GL831166.1:1331299-1334038		28.6815	24.7136	3.48222	6.81017	22.3249	7.85076	21.4217	18.7179
ENSONIG00000001950	ENSONIG00000001950	sez6a	GL831223.1:1952059-2042542		31.1197	2.77449	0	0	10.6938	0.0360634	0	0
ENSONIG00000001951	ENSONIG00000001951	bpifcl	GL831166.1:1337709-1342963		18.8817	24.0747	13.8892	3.43571	2.90451	6.0426	8.97711	128.315
ENSONIG00000001952	ENSONIG00000001952	trim35-12	GL831149.1:6076919-6080773		0.566384	0.315476	34.3183	0	0.0683737	0.192972	0.1697	0.0474653
ENSONIG00000001953	ENSONIG00000001953	-	GL831140.1:1792876-1816832		0.826893	0.172799	0	0	0.0500939	0	0	0
ENSONIG00000001954	ENSONIG00000001954	smfn	GL831515.1:2168-13208		17.7008	24.9961	7.37555	8.47148	151.473	81.5931	29.3513	26.3889
ENSONIG00000001955	ENSONIG00000001955	myo18aa	GL831223.1:2076069-2129714		0.858068	12.4898	0.776948	1.56165	3.30936	5.63719	21.7446	0.0196289
ENSONIG00000001956	ENSONIG00000001956	-	GL831166.1:1343659-1347864		15.6776	3.80018	0	0	0.213607	0	0	0.208079
ENSONIG00000001957	ENSONIG00000001957	actr5	GL831166.1:1355747-1361262		2.4734	3.12094	1.08267	0.8655	8.15542	15.7576	3.2512	3.8048
ENSONIG00000001958	ENSONIG00000001958	gipc1	GL831149.1:6081612-6087923		25.6532	15.336	5.35025	2.31075	20.592	3.73275	5.71746	4.73158
ENSONIG00000001959	ENSONIG00000001959	dnajb1a	GL831149.1:6092745-6095180		4.87929	3.43562	0.406075	0.182349	8.65073	0.638112	2.52462	1.33109
ENSONIG00000001960	ENSONIG00000001960	CLMP (1 of 2)	GL831515.1:94211-163355		4.70664	0.0961601	0	0	0.0416028	0	0	0
ENSONIG00000001961	ENSONIG00000001961	SHMT2 (1 of 3)	GL831166.1:1379754-1388267		2.96915	0	0.0775371	67.2261	0	0	0	0
ENSONIG00000001962	ENSONIG00000001962	tecra	GL831149.1:6097449-6112928		0.104314	41.9945	0	0	0.0809798	0	37.6406	0
ENSONIG00000001963	ENSONIG00000001963	soat1	GL831140.1:1820303-1828472		11.1242	6.03395	4.27432	2.44762	11.6057	17.8818	1.98284	59.93
ENSONIG00000001964	ENSONIG00000001964	vezf1a	GL831223.1:2134605-2146183		4.64487	10.9545	1.26147	1.92311	8.67055	1.16752	6.78917	7.16197
ENSONIG00000001965	ENSONIG00000001965	-	GL832045.1:3198-4526		0	0	0.122684	0	0	0	0	1.63418
ENSONIG00000001966	ENSONIG00000001966	KSR1 (1 of 2)	GL831223.1:2155566-2182947		7.08735	4.83924	0.575486	0.618777	1.74922	0.193708	0.253587	1.2915
ENSONIG00000001967	ENSONIG00000001967	-	AERX01077096.1:431-1013		0	0	0	0	0	0	0	0
ENSONIG00000001968	ENSONIG00000001968	p2rx8 (1 of 2)	AERX01073197.2:2237-5224		0.215473	0	0.622934	0	0.781771	0	0	37.9627
ENSONIG00000001969	ENSONIG00000001969	samd1a	GL831149.1:6097449-6112928		1.90757	13.7859	1.58785	1.31526	9.23756	2.99818	10.8386	3.27398
ENSONIG00000001970	ENSONIG00000001970	prkacaa	GL831149.1:6119735-6125850		3.09378	9.83047	1.72556	2.20441	5.05611	2.30218	4.62456	9.03221
ENSONIG00000001971	ENSONIG00000001971	omga	GL831223.1:2191744-2195680		3.07711	0	0.0172164	0	0.44763	0	0	0.194389
ENSONIG00000001972	ENSONIG00000001972	msi2a (1 of 2)	GL831223.1:2204592-2367001		1.35343	7.79764	0.503617	1.67688	5.97984	3.73616	4.54297	1.94326
ENSONIG00000001973	ENSONIG00000001973	CEMIP	GL831223.1:2376321-2543331		1.91819	0.246515	0.0111342	0.301351	0.400801	0.077834	0.198332	0.0911176
ENSONIG00000001974	ENSONIG00000001974	abl2	GL831140.1:1829039-1851963		1.69425	0.662103	0.211462	0.32194	2.12922	1.80647	0.452448	1.40626
ENSONIG00000001975	ENSONIG00000001975	stac3	GL831166.1:1404498-1412792		0	0	0.0591836	0	0.498655	0	98.2913	0.0467994
ENSONIG00000001976	ENSONIG00000001976	abhd17c	GL831223.1:2570316-2607556		9.31398	2.73285	3.11426	2.44362	6.84921	3.47745	2.21215	8.96907
ENSONIG00000001977	ENSONIG00000001977	KIF5A (1 of 2)	GL831166.1:1432137-1448383		62.6431	1.21236	0.0157852	0	4.7538	0	0	0.106097
ENSONIG00000001978	ENSONIG00000001978	arnt2	GL831223.1:2640967-2733959		26.871	7.68225	3.11003	2.70193	6.93662	1.02016	4.5269	5.75041
ENSONIG00000001979	ENSONIG00000001979	osbpl9	GL831140.1:1857212-1894602		24.6799	31.786	16.9684	15.4925	29.5479	12.4507	14.6322	59.9323
ENSONIG00000001980	ENSONIG00000001980	asf1ba	GL831149.1:6137959-6141502		3.55332	7.68113	2.21854	0.98247	75.1565	66.3698	5.66631	25.3324
ENSONIG00000001981	ENSONIG00000001981	tubb4b	GL831149.1:6153925-6156927		118.443	4.19016	0.0581341	0.298245	10.1662	0.0371463	0.327642	0.120025
ENSONIG00000001982	ENSONIG00000001982	TRIM35 (6 of 54)	GL831149.1:6157770-6162091		0.0565904	0.314668	0.132485	0.104201	0.860835	0.0285217	1.91179	0
ENSONIG00000001983	ENSONIG00000001983	-	GL831956.1:45667-48588		3.7377	31.5766	8.84632	1.58303	2.74889	0.752081	1.22081	33.4682
ENSONIG00000001984	ENSONIG00000001984	tor3a	GL831140.1:1900855-1906488		19.1616	3.58728	2.24789	53.2994	15.9663	0.471833	0.498466	2.57508
ENSONIG00000001985	ENSONIG00000001985	gcgra	GL831149.1:6185089-6235757		1.53575	0.376639	0.20514	18.4798	0.775865	0.336734	0.258236	0.062335
ENSONIG00000001986	ENSONIG00000001986	-	GL832056.1:19753-21218		6.02397	17.042	1.2975	2.39714	8.66391	3.77676	2.21622	18.6451
ENSONIG00000001987	ENSONIG00000001987	calrl2	GL831140.1:1907303-1911988		68.189	5.84991	4.53417	7.27326	30.1417	0.67369	2.01193	55.5518
ENSONIG00000001988	ENSONIG00000001988	si:dkey-65j6.2	GL831166.1:1471640-1486017		0.243964	0.156545	0	0	0.177005	0.0122811	0.0557084	0
ENSONIG00000001989	ENSONIG00000001989	cmtm7	GL831233.1:13562-19363		3.7593	2.06445	0.8851	0	17.7743	3.95404	2.51061	7.09801
ENSONIG00000001990	ENSONIG00000001990	eps15	GL831140.1:1915811-1936750		3.52508	4.59459	1.83212	2.12181	7.38729	2.2443	3.49219	11.457
ENSONIG00000001991	ENSONIG00000001991	si:ch1073-100f3.2	GL831149.1:6271941-6285243		9.50682	6.54556	1.83229	20.5677	12.1064	53.9994	90.4232	15.0922
ENSONIG00000001992	ENSONIG00000001992	SIGLEC15	GL831233.1:72425-76659		10.1595	73.5819	1.15863	7.021	2.51111	3.00462	1.2575	1.68879
ENSONIG00000001993	ENSONIG00000001993	SLC4A7 (1 of 2)	GL831233.1:113408-136970		9.43866	19.106	15.0655	8.95861	11.5278	13.001	10.9054	14.4363
ENSONIG00000001994	ENSONIG00000001994	tgm2a	GL831166.1:1496863-1504167		30.3803	1.89303	0.0312468	0	3.93384	0.0876376	147.671	0.0342181
ENSONIG00000001995	ENSONIG00000001995	zgc:103625	GL831149.1:6286451-6300605		0	1.93974	0	0	0.600575	0	0	0.227136
ENSONIG00000001996	ENSONIG00000001996	hgs	GL831149.1:6286451-6300605		34.8569	33.3939	10.1699	9.3199	29.4783	11.8218	38.3216	18.4369
ENSONIG00000001997	ENSONIG00000001997	ttc39a	GL831140.1:1950431-1966320		7.27915	4.31874	3.0724	0.632478	2.37775	0.994794	0	2.82321
ENSONIG00000001998	ENSONIG00000001998	-	GL831161.1:24505-30195		0	0	0	0	7.62368	2.43006	0	0.541221
ENSONIG00000001999	ENSONIG00000001999	-	GL831161.1:70701-71936		0.286686	0	0.262047	0	4.6922	0.121546	0	0
[truncated: 20,284 more rows]

## Sheet: oremo.dev.rpkm
Transcript ID	Ensembl Gene ID	Description	WDS-annotation	5dzx-RPKM	5dxx2-RPKM	5dxy2-RPKM	5dXX	5dXY	30dXX	30dXY	3mXX	3mXY	45dat	90dat	6mXX	6mXY	GO	IPR	KEGG	test_id	gsdf	locus	7d_XX	7d_XY	20d_XX	20d_XY	40d_XX	40d_XY	300d_XX	300d_XY
ENSONIT00000000001	ENSONIG00000000001			24.546	19.5297	17.3516														ENSONIG00000000001	ppfibp1a	GL831243.1:195804-234623	11.941	20.0868	12.2723	15.0115	23.934	19.8722	45.09	21.4579
ENSONIT00000000003	ENSONIG00000000002	cytochrome b5 reductase 3 [Source:HGNC Symbol;Acc:2873]		57.7027	37.6652	36.5768	1.92339	1.42995	79.1006	76.7313	108.903	238.545	129.979	136.54	114.371	318.509	GO:0055114; oxidation-reduction process; Biological Process GO:0016491; oxidoreductase activity; Molecular Function	IPR008333; Oxidoreductase, FAD-binding domain IPR001433; Oxidoreductase FAD/NAD(P)-binding IPR001834; NADH:cytochrome b5 reductase (CBR) IPR001709; Flavoprotein pyridine nucleotide cytochrome reductase	K00326; Metabolism; Carbohydrate Metabolism; Amino sugar and nucleotide sugar metabolism [PATH:ko00520]	ENSONIG00000000002	cyb5r3	GL831243.1:195804-234623	38.3216	33.5523	33.8784	35.5994	82.0445	67.1957	89.2889	88.7181
ENSONIT00000000004	ENSONIG00000000003	synaptotagmin I [Source:HGNC Symbol;Acc:11509]		5.71882	1.83992	2.4783	0.097436	0.338049	1.86326	3.64544	0.914938	7.00612	0.841371	1.20669	1.47179	5.54424	GO:0005515; protein binding; Molecular Function	IPR000008; C2 calcium-dependent membrane targeting IPR001565; Synaptotagmin IPR020477; C2 domain IPR018029; C2 membrane targeting protein	K15290; Organismal Systems; Nervous System; Synaptic vesicle cycle [PATH:ko04721]	ENSONIG00000000003	syt1a	GL831243.1:237232-296029	0.71672	1.55117	1.78974	1.94222	0.826412	3.16171	0.862486	1.96202
ENSONIT00000000005	ENSONIG00000000004	PRKC, apoptosis, WT1, regulator [Source:HGNC Symbol;Acc:8614]		7.89523	9.95573	6.51898	0.885719	5.87276	10.9107	8.96394	19.314	9.88373	13.4662	14.2192	29.2898	12.0551	NA	NA	NA	ENSONIG00000000004	pawr	GL831243.1:475958-543538	8.46253	13.1227	11.3619	9.4155	12.2029	13.5232	18.512	5.08897
ENSONIT00000000007	ENSONIG00000000005	protein phosphatase 1, regulatory subunit 12A [Source:HGNC Symbol;Acc:7618]		6.80749	7.41282	4.55393	6.51939	20.3078	11.2165	15.7332	47.8877	45.5856	38.0935	60.5056	78.6198	59.0635	GO:0051017; actin filament bundle assembly; Biological Process GO:0001889; liver development; Biological Process GO:0005515; protein binding; Molecular Function	IPR017401; Protein phosphatase 1, regulatory subunit 12A/B/C, eukaryote IPR002110; Ankyrin repeat IPR020683; Ankyrin repeat-containing domain	K06270; Cellular Processes; Cell Motility; Regulation of actin cytoskeleton [PATH:ko04810] Cellular Processes; Cell Communication; Focal adhesion [PATH:ko04510] Organismal Systems; Circulatory System; Vascular smooth muscle contraction [PATH:ko04270] Organismal Systems; Nervous System; Long-term potentiation [PATH:ko04720]	ENSONIG00000000005	ppp1r12a	GL831243.1:558165-615914	3.37693	5.2308	3.76442	4.43079	4.78612	5.35461	9.62184	7.47452
ENSONIT00000000008	ENSONIG00000000006	ribosomal protein S16 [Source:HGNC Symbol;Acc:10396]	WDS-Tilapia-RPS16-mRNA	2650.43	2196.88	3775.85	2802.09	2284.68	1473.02	1781.78	225.542	803.114	203.868	237.661	177.261	457.29	GO:0006412; translation; Biological Process GO:0005622; intracellular; Cellular Component GO:0005840; ribosome; Cellular Component GO:0003735; structural constituent of ribosome; Molecular Function	IPR000754; Ribosomal protein S9	K02960; Genetic Information Processing; Translation; Ribosome [PATH:ko03010]	ENSONIG00000000006	rps16	GL831243.1:653138-656057	4543.99	3715.69	3566.53	3472.52	2699.19	2469.82	899.075	959.68
ENSONIT00000000009	ENSONIG00000000007	myogenic factor 6 (herculin) [Source:HGNC Symbol;Acc:7566]		1.99697	2.12074	3.77984	0	0	0.58824	0	0	0.214971	0.36341	0.188212	0.177724	0.104292	GO:0006355; regulation of transcription, DNA-dependent; Biological Process GO:0007517; muscle organ development; Biological Process GO:0007519; skeletal muscle tissue development; Biological Process GO:0005634; nucleus; Cellular Component GO:0003677; DNA binding; Molecular Function	IPR002546; Myogenic basic muscle-specific protein IPR011598; Helix-loop-helix DNA-binding	NA	ENSONIG00000000007	myf6	GL831243.1:697392-699565	1.51805	0.945805	0.0619824	0.301102	0	0.0410755	0.0774185	0.0597387
ENSONIT00000000010	ENSONIG00000000008	guanylate cyclase activator 1A (retina) [Source:HGNC Symbol;Acc:4678]		5.62137	0.246183	0.0927703	0	0	0.0499783	0	0	0	0	0.0746243	0	0	GO:0007165; signal transduction; Biological Process GO:0005578; proteinaceous extracellular matrix; Cellular Component GO:0005509; calcium ion binding; Molecular Function	IPR018248; EF-hand IPR019577; SPARC/Testican, calcium-binding domain IPR002048; Calcium-binding EF-hand IPR001125; Recoverin IPR018249; EF-HAND 2	K08328; Organismal Systems; Sensory System; Phototransduction [PATH:ko04744] Organismal Systems; Sensory System; Olfactory transduction [PATH:ko04740]	ENSONIG00000000008	guca1a	GL831243.1:2151992-2156712	0	0.0954288	0.058004	0	0.074732	0.163103	0	0
ENSONIT00000000011	ENSONIG00000000009	golgin B1 [Source:HGNC Symbol;Acc:4429]		10.421	11.2199	4.06736	2.98884	4.22985	11.3186	10.5776	28.4691	16.9985	15.0798	20.3312	24.0985	15.3417	NA	NA	NA	ENSONIG00000000009	-	GL831243.1:2162662-2175369	3.41184	3.53703	3.5293	3.86321	4.03968	4.98127	2.70623	2.35696
ENSONIT00000000012	ENSONIG00000000010			5.91294	6.08771	5.42204														ENSONIG00000000010	hcls1	GL831243.1:2181655-2197855	33.3515	13.6368	31.3667	24.5219	71.1968	33.1167	8.10822	10.0891
ENSONIT00000000014	ENSONIG00000000011	LLP homolog, long-term synaptic facilitation (Aplysia) [Source:HGNC Symbol;Acc:28229]		27.398	23.7276	25.3631	4.05664	22.8942	149.018	87.5265	883.998	244.065	957.617	537.224	581.531	239.226	NA	IPR018784; Learning associated protein 18-like	NA	ENSONIG00000000011	llph	GL831243.1:2181655-2197855	40.7175	35.0795	32.7363	39.7945	30.2956	23.5592	152.538	33.1547
ENSONIT00000000015	ENSONIG00000000012	peroxisomal biogenesis factor 26 [Source:HGNC Symbol;Acc:22965]		3.15566	1.4376	1.93477	0.205393	0.158355	2.8393	2.35879	13.715	8.87737	11.5511	13.9431	22.3513	7.94802	GO:0045046; protein import into peroxisome membrane; Biological Process GO:0005779; integral to peroxisomal membrane; Cellular Component GO:0032403; protein complex binding; Molecular Function	IPR010797; Pex26	K13340; Cellular Processes; Transport and Catabolism; Peroxisome [PATH:ko04146]	ENSONIG00000000012	pex26	GL831243.1:2181655-2197855	1.16042	0.8203	0.841643	1.01004	1.37138	1.71265	19.9496	6.07388
ENSONIT00000000016	ENSONIG00000000013			9.51902	8.13601	8.33523	0.0606109	0	8.658	17.7499	24.2835	5.85859	26.6522	11.3846	6.49737	8.83875	GO:0006511; ubiquitin-dependent protein catabolic process; Biological Process GO:0004221; ubiquitin thiolesterase activity; Molecular Function	IPR001394; Peptidase C19, ubiquitin carboxyl-terminal hydrolase 2	NA	ENSONIG00000000013	usp18	GL831243.1:2199758-2208790	16.827	28.6865	25.3957	15.022	17.2623	20.4679	37.7822	7.37124
ENSONIT00000000018	ENSONIG00000000014	cyclin D2 [Source:HGNC Symbol;Acc:1583]		27.7028	21.6327	17.8809	1.53685	0.969457	21.2128	26.6248	56.4129	41.5018	42.4729	41.3823	68.3495	27.4051	GO:0005634; nucleus; Cellular Component	IPR006671; Cyclin, N-terminal IPR004367; Cyclin, C-terminal IPR013763; Cyclin-like	NA	ENSONIG00000000014	ccnd2b	GL831243.1:2243067-2258693	27.7315	33.8243	40.3297	29.5171	34.2228	41.9083	102.528	26.5004
ENSONIT00000000019	ENSONIG00000000015	chromosome 12 open reading frame 5 [Source:HGNC Symbol;Acc:1185]		6.1724	4.69294	4.82982	0	0.175239	8.20416	6.48491	30.9473	48.4048	26.0684	35.1338	18.3846	43.9771	NA	IPR013078; Histidine phosphatase superfamily, clade-1	K14634; Metabolism; Carbohydrate Metabolism; Fructose and mannose metabolism [PATH:ko00051]	ENSONIG00000000015	tigarb	GL831243.1:2304270-2309272	7.42737	4.64505	5.46591	4.07419	9.13156	5.26235	22.0505	16.6961
ENSONIT00000000020	ENSONIG00000000016	fibroblast growth factor 23 [Source:HGNC Symbol;Acc:3680]	WDS-Tilapia-fgf23a-mRNA	0.121887	0.001	0.0494368	0.402495	0.372382	0	0.260008	0	0.379558	0	0	0	0.184141	GO:0008083; growth factor activity; Molecular Function	IPR002348; Interleukin 1/heparin-binding growth factor	K04358; Environmental Information Processing; Signal Transduction; Two-component system [BR:ko02022] Environmental Information Processing; Signal Transduction; MAPK signaling pathway [PATH:ko04010] Environmental Information Processing; Signal Transduction; PI3K-Akt signaling pathway [PATH:ko04151] Cellular Processes; Cell Motility; Regulation of actin cytoskeleton [PATH:ko04810] Human Diseases; C…	ENSONIG00000000016	fgf23	GL831243.1:2311992-2314957	0.0554149	0.0308874	0.039803	0	0.0243743	0.103228	0	0.109507
ENSONIT00000000021	ENSONIG00000000017	fibroblast growth factor 6 [Source:HGNC Symbol;Acc:3684]	WDS-Tilapia-fgf6a-mRNA	1.64665	1.45043	2.1818	0	1.37495	0	0.10667	0.155056	0.233574	0.0438732	0	0.0482759	0.0566586	GO:0008083; growth factor activity; Molecular Function	IPR002348; Interleukin 1/heparin-binding growth factor IPR002209; Heparin-binding growth factor/Fibroblast growth factor	K04358; Environmental Information Processing; Signal Transduction; Two-component system [BR:ko02022] Environmental Information Processing; Signal Transduction; MAPK signaling pathway [PATH:ko04010] Environmental Information Processing; Signal Transduction; PI3K-Akt signaling pathway [PATH:ko04151] Cellular Processes; Cell Motility; Regulation of actin cytoskeleton [PATH:ko04810] Human Diseases; C…	ENSONIG00000000017	fgf6b (1 of many)	GL831243.1:2315908-2322511	1.17017	1.81256	0.161395	0.302059	0.128249	0.136218	0.0281347	0.0227044
ENSONIT00000000022	ENSONIG00000000018	UDP-N-acetyl-alpha-D-galactosamine:polypeptide N-acetylgalactosaminyltransferase 8 (GalNAc-T8) [Source:HGNC Symbol;Acc:4130]		0.391214	0.221565	0.257847	0.273727	0.361783	0.973012	0.926227	27.0497	0.737509	21.2643	19.3981	18.8824	0.491973	NA	IPR001173; Glycosyl transferase, family 2 IPR000772; Ricin B lectin domain	K00710; Metabolism; Glycan Biosynthesis and Metabolism; Mucin type O-glycan biosynthesis [PATH:ko00512]	ENSONIG00000000018	galnt8b.1	GL831243.1:2348119-2363923	0.233048	0.0816941	0.226386	0.192504	1.83597	0.148131	29.8326	0.179449
ENSONIT00000000023	ENSONIG00000000019			11.6241	12.0936	8.41447														ENSONIG00000000019	XPO1 (1 of many)	GL831280.1:2152-29592	22.0577	20.8873	15.9853	15.5756	27.5401	23.0946	42.7808	43.8341
ENSONIT00000000025	ENSONIG00000000020	cat eye syndrome chromosome region, candidate 1 [Source:HGNC Symbol;Acc:1839]		2.80572	1.92588	4.55911	4.05599	4.64331	3.56803	4.91827	1.15413	1.93175	1.68724	0.817455	1.85656	0.140577	GO:0009168; purine ribonucleoside monophosphate biosynthetic process; Biological Process GO:0005615; extracellular space; Cellular Component GO:0019239; deaminase activity; Molecular Function	IPR001365; Adenosine/AMP deaminase domain IPR013659; Adenosine/AMP deaminase N-terminal IPR006331; Adenosine deaminase-related growth factor	NA	ENSONIG00000000020	cecr1b	GL831243.1:2348119-2363923	1.35732	2.89463	0.700225	1.23208	3.9145	2.50197	4.26584	0.346005
ENSONIT00000000026	ENSONIG00000000021			93.3537	74.6762	80.6703	26.781	76.012	27.8183	27.612	56.2626	30.6054	64.2011	60.0249	56.798	39.4045	GO:0015991; ATP hydrolysis coupled proton transport; Biological Process GO:0060041; retina development in camera-type eye; Biological Process GO:0033178; proton-transporting two-sector ATPase complex, catalytic domain; Cellular Component GO:0046961; proton-transporting ATPase activity, rotational mechanism; Molecular Function	IPR002842; ATPase, V1/A1 complex, subunit E	K02150; Metabolism; Energy Metabolism; Oxidative phosphorylation [PATH:ko00190] Cellular Processes; Transport and Catabolism; Phagosome [PATH:ko04145] Organismal Systems; Excretory System; Collecting duct acid secretion [PATH:ko04966] Organismal Systems; Nervous System; Synaptic vesicle cycle [PATH:ko04721] Human Diseases; Immune Diseases; Rheumatoid arthritis [PATH:ko05323] Human Diseases; Infec…	ENSONIG00000000021	atp6v1e1b	GL831243.1:2365374-2376212	60.7843	49.9882	59.1703	42.7082	54.1763	51.4723	109.837	40.287
ENSONIT00000000027	ENSONIG00000000022			0.001	0.0746578	0.001														ENSONIG00000000022	-	GL831446.1:59672-62819	2.83785	2.2598	3.30452	2.20609	2.86092	1.24528	2.1661	3.71513
ENSONIT00000000029	ENSONIG00000000023						0.0801857	0	0	0.129498	0	0	0	0	0	0.091712	GO:0003676; nucleic acid binding; Molecular Function GO:0016787; hydrolase activity; Molecular Function GO:0046872; metal ion binding; Molecular Function	IPR001604; DNA/RNA non-specific endonuclease IPR020821; Extracellular Endonuclease, subunit A	NA	ENSONIG00000000023	-	GL831446.1:83087-85992	0	0	0	0	0.0989473	0.106871	0	0
ENSONIT00000000030	ENSONIG00000000024			0.0626655	0.0292277	0.001	0	0.20283	0	0	0	0	0	0.0603345	0	0.100298	GO:0003676; nucleic acid binding; Molecular Function GO:0016787; hydrolase activity; Molecular Function GO:0046872; metal ion binding; Molecular Function	IPR001604; DNA/RNA non-specific endonuclease	NA	ENSONIG00000000024	-	GL831446.1:109632-111113	0	0	0	0	0	0	0	0.241552
ENSONIT00000000031	ENSONIG00000000025			0.0617459	0.115195	0.122089	0	0.2259	0.765071	0.63092	0.152851	2.76304	0.172998	0.268789	0	1.73145	GO:0005515; protein binding; Molecular Function	IPR003599; Immunoglobulin subtype IPR007110; Immunoglobulin-like	NA	ENSONIG00000000025	-	GL831446.1:138979-142025	0	0.193221	0	0.197382	0.0532392	0.0577563	0.0873269	0.88192
ENSONIT00000000032	ENSONIG00000000026			0.001	0.0562993	0.0530387	0.0844579	0	0	0.0909318	0.528714	0	0.411402	0.755418	0.617298	0.0482992	GO:0003676; nucleic acid binding; Molecular Function GO:0016787; hydrolase activity; Molecular Function GO:0046872; metal ion binding; Molecular Function	IPR001604; DNA/RNA non-specific endonuclease IPR020821; Extracellular Endonuclease, subunit A	NA	ENSONIG00000000026	-	GL831446.1:161770-163603	0	0	0.0766013	0	0	0.319325	0.466596	0.0414244
ENSONIT00000000033	ENSONIG00000000027			0.202425	0.0708095	0.133417	0.212451	0	0.195791	0.667145	0	0.166953	0	0	0	0.222741	GO:0015684; ferrous iron transport; Biological Process GO:0016021; integral to membrane; Cellular Component GO:0005525; GTP binding; Molecular Function GO:0015093; ferrous iron transmembrane transporter activity; Molecular Function	IPR006703; AIG1 IPR011619; Ferrous iron transport protein B, N-terminal	NA	ENSONIG00000000027	-	GL831446.1:212895-215002	0	0.0900612	0.268356	0.0489345	0	0.0813013	0.0327314	0.104067
ENSONIT00000000034	ENSONIG00000000028			0.993806	1.68553	0.555768	0	0	0.0659436	0.462236	0	2.36169	0	0.590776	0.0697318	0.654722	GO:0005515; protein binding; Molecular Function	IPR013106; Immunoglobulin V-set IPR013151; Immunoglobulin IPR013098; Immunoglobulin I-set IPR003596; Immunoglobulin V-set, subgroup IPR007110; Immunoglobulin-like	NA	ENSONIG00000000028	-	GL831446.1:298858-299503	0.275191	0	0.191559	0	0	0	0.514506	0.0893834
ENSONIT00000000035	ENSONIG00000000029	chaperonin containing TCP1, subunit 4 (delta) [Source:HGNC Symbol;Acc:1617]		246.586	247.905	286.2	28.6666	18.6399	337.997	389.704	93.6917	202.567	91.5962	90.2468	95.4586	194.858	GO:0044267; cellular protein metabolic process; Biological Process GO:0006457; protein folding; Biological Process GO:0001666; response to hypoxia; Biological Process GO:0005524; ATP binding; Molecular Function GO:0051082; unfolded protein binding; Molecular Function	IPR002423; Chaperonin Cpn60/TCP-1 IPR017998; Chaperone, tailless complex polypeptide 1 IPR001844; Chaperonin Cpn60 IPR012717; T-complex protein 1, delta subunit	NA	ENSONIG00000000029	cct4	GL831280.1:32957-53546	234.249	163.418	189.822	163.097	162.02	112.583	79.9721	64.2374
ENSONIT00000000036	ENSONIG00000000030						0	0	0.124129	0.0725077	0	0	0.119289	0.0926707	0	0	GO:0005515; protein binding; Molecular Function	IPR007110; Immunoglobulin-like	NA	ENSONIG00000000030	-	GL831446.1:325577-327690	0	0	0	0	0	0	0	0
ENSONIT00000000037	ENSONIG00000000031	Spi-C transcription factor (Spi-1/PU.1 related) [Source:HGNC Symbol;Acc:29549]		0.612957	0.647295	0.680951	0.224811	0	4.07459	5.48633	0.234557	0.353334	0.165921	0.103117	0.0730283	0.642818	GO:0006355; regulation of transcription, DNA-dependent; Biological Process GO:0003700; sequence-specific DNA binding transcription factor activity; Molecular Function GO:0043565; sequence-specific DNA binding; Molecular Function	IPR000418; Ets	NA	ENSONIG00000000031	spic	GL831243.1:2392098-2394442	2.10518	1.75622	7.07576	1.94148	2.16067	1.70469	0	0.0933055
ENSONIT00000000038	ENSONIG00000000032			1.79105	2.69172	0.961865	0	0	1.66819	0.524701	7.19123	0.328266	13.0719	9.96335	14.7228	0.557399	GO:0005515; protein binding; Molecular Function	IPR013106; Immunoglobulin V-set IPR013151; Immunoglobulin IPR007110; Immunoglobulin-like	NA	ENSONIG00000000032	-	GL831446.1:330638-333181	0.311218	0	2.16258	0.621067	0.825664	2.58285	13.2755	0
ENSONIT00000000039	ENSONIG00000000033	transmembrane protein 185B [Source:HGNC Symbol;Acc:18896]		15.5505	11.0465	9.45081	0.116758	0.540113	9.89938	11.7222	28.3229	70.8795	21.6637	41.8129	33.5946	55.5531	NA	IPR019396; Transmembrane Fragile-X-F-associated protein	NA	ENSONIG00000000033	tmem185	GL831446.1:367523-374863	16.1394	17.6246	14.0058	13.942	21.3658	18.3897	50.2151	25.2781
ENSONIT00000000040	ENSONIG00000000034	myosin binding protein C, slow type [Source:HGNC Symbol;Acc:7549]		1.06922	1.47029	1.94405	0.0984445	1.63184	0.355339	0.309139	0.231102	0.154724	0.130781	0.0790209	0	0.272106	GO:0005515; protein binding; Molecular Function	IPR013098; Immunoglobulin I-set IPR003961; Fibronectin, type III IPR003599; Immunoglobulin subtype IPR003598; Immunoglobulin subtype 2 IPR007110; Immunoglobulin-like	NA	ENSONIG00000000034	mybpc1	GL831243.1:2400554-2438259	3.82096	2.1786	0.48005	0.610439	0.19567	0.278737	0.00916062	0.160875
ENSONIT00000000042	ENSONIG00000000035	MUS81 endonuclease homolog (S. cerevisiae) [Source:HGNC Symbol;Acc:29814]		4.55297	2.75822	3.2998	4.28774	4.7665	4.47225	3.65018	41.875	23.8215	47.1442	37.1388	35.0315	27.1625	GO:0006259; DNA metabolic process; Biological Process GO:0003677; DNA binding; Molecular Function GO:0004518; nuclease activity; Molecular Function	IPR006166; ERCC4 domain	K08991; Genetic Information Processing; Replication and Repair; Homologous recombination [PATH:ko03440] Genetic Information Processing; Replication and Repair; Fanconi anemia pathway [PATH:ko03460]	ENSONIG00000000035	mus81	GL831446.1:375493-384908	2.27898	1.34242	2.25734	1.70263	4.79533	3.0664	45.2834	14.1953
ENSONIT00000000043	ENSONIG00000000036	pseudouridylate synthase 10 [Source:HGNC Symbol;Acc:26505]		46.2602	46.6062	49.6705	0.151806	0.263342	3.8648	3.86133	12.1166	13.6893	13.68	11.6197	12.6303	10.7215	NA	NA	NA	ENSONIG00000000036	pus10	GL831280.1:32957-53546	36.8147	15.9234	25.898	24.6944	27.4098	15.6289	14.6729	11.6826
ENSONIT00000000045	ENSONIG00000000037	ovo-like 2 (Drosophila) [Source:HGNC Symbol;Acc:15804]		1.17768	1.25876	2.34297	2.41733	1.11824	10.9996	6.66922	14.0923	1.13979	13.6483	10.2286	17.1086	0.518402	GO:0070285; pigment cell development; Biological Process GO:0090150; establishment of protein localization in membrane; Biological Process GO:0001755; neural crest cell migration; Biological Process GO:0005622; intracellular; Cellular Component GO:0005634; nucleus; Cellular Component GO:0008270; zinc ion binding; Molecular Function	IPR015880; Zinc finger, C2H2-like IPR007087; Zinc finger, C2H2	NA	ENSONIG00000000037	ovol1	GL831446.1:388319-399226	3.02058	3.64639	13.3315	4.70509	0.944833	2.15047	8.14351	0.18278
ENSONIT00000000047	ENSONIG00000000038	v-akt murine thymoma viral oncogene homolog 3 (protein kinase B, gamma) [Source:HGNC Symbol;Acc:393]		19.1509	12.9982	8.64991	0.171731	6.25603	7.89345	15.1382	12.0271	22.2674	4.46776	17.8119	24.6223	30.9356	GO:0006468; protein phosphorylation; Biological Process GO:0004672; protein kinase activity; Molecular Function GO:0005524; ATP binding; Molecular Function GO:0004674; protein serine/threonine kinase activity; Molecular Function GO:0005515; protein binding; Molecular Function GO:0005543; phospholipid binding; Molecular Function GO:0004713; protein tyrosine kinase activity; Molecular Function	IPR000719; Protein kinase, catalytic domain IPR001245; Serine-threonine/tyrosine-protein kinase catalytic domain IPR001849; Pleckstrin homology domain IPR017892; Protein kinase, C-terminal IPR002290; Serine/threonine- / dual-specificity protein kinase, catalytic domain IPR020635; Tyrosine-protein kinase, catalytic domain IPR000961; AGC-kinase, C-terminal	K04456; Environmental Information Processing; Signal Transduction; Two-component system [BR:ko02022] Environmental Information Processing; Signal Transduction; MAPK signaling pathway [PATH:ko04010] Environmental Information Processing; Signal Transduction; ErbB signaling pathway [PATH:ko04012] Environmental Information Processing; Signal Transduction; VEGF signaling pathway [PATH:ko04370] Environ…	ENSONIG00000000038	akt3b	GL831280.1:55935-74118	7.91294	14.4021	12.3223	7.51154	7.35751	9.37392	8.54917	22.9171
ENSONIT00000000048	ENSONIG00000000039	cytidine monophosphate N-acetylneuraminic acid synthetase [Source:HGNC Symbol;Acc:18290]		2.80194	1.99974	2.01063	0.761486	0	9.10113	8.91593	17.9506	1.68303	7.88219	12.0829	21.7293	0.489908	GO:0009103; lipopolysaccharide biosynthetic process; Biological Process	IPR003329; Acylneuraminate cytidylyltransferase	K00983; Metabolism; Carbohydrate Metabolism; Amino sugar and nucleotide sugar metabolism [PATH:ko00520]	ENSONIG00000000039	CMAS	GL831446.1:470543-479862	3.01992	3.16506	8.77369	6.62969	5.27877	13.33	11.3116	0.0769992
ENSONIT00000000049	ENSONIG00000000040			4.75485	3.99837	3.00468	0.457949	0.529611	11.7116	2.83505	0	1.07963	0.202792	0.15754	0.111571	0	GO:0005576; extracellular region; Cellular Component	IPR001526; CD59 antigen IPR003571; Snake toxin	NA	ENSONIG00000000040	-	GL832066.1:22477-30190	8.2262	3.04033	12.1844	1.47493	1.05247	1.41823	0.478614	2.40606
ENSONIT00000000050	ENSONIG00000000041			2.64277	1.78302	2.53668	0	0.346235	7.40356	11.7383	4.21691	3.76433	5.03788	1.57922	4.036	2.85351	NA	NA	NA	ENSONIG00000000041	-	GL831280.1:132396-143223	5.16096	4.15299	18.0991	9.52267	6.079	14.3858	13.4033	0.590515
ENSONIT00000000051	ENSONIG00000000042	LTV1 homolog (S. cerevisiae) [Source:HGNC Symbol;Acc:21173]		28.2111	31.1689	26.6467	4.26813	1.19661	26.958	39.4777	98.5764	48.4818	85.1853	67.6599	74.8903	41.0503	NA	IPR007307; Low temperature viability protein	NA	ENSONIG00000000042	ltv1	GL831280.1:146160-154100	43.2293	19.951	17.6559	16.1498	16.0045	14.4034	83.4781	17.3993
ENSONIT00000000052	ENSONIG00000000043	calpain 9 [Source:HGNC Symbol;Acc:1486]		3.94737	4.02357	9.9473	2.3743	1.1969	10.2954	12.7159	0.285834	3.37285	1.21316	0.691129	0.385637	0.609269	GO:0006508; proteolysis; Biological Process GO:0005622; intracellular; Cellular Component GO:0004198; calcium-dependent cysteine-type endopeptidase activity; Molecular Function GO:0005509; calcium ion binding; Molecular Function	IPR001300; Peptidase C2, calpain, catalytic domain IPR022682; Peptidase C2, calpain, large subunit, domain III IPR022683; Peptidase C2, calpain, domain III IPR002048; Calcium-binding EF-hand IPR022684; Peptidase C2, calpain family IPR018249; EF-HAND 2	NA	ENSONIG00000000043	capn9	GL831280.1:155167-167753	9.7463	7.04452	10.9157	8.49978	0.795862	3.92129	2.46501	0.363953
ENSONIT00000000053	ENSONIG00000000044			0.001	0.245304	0.61626	0	0	0.791323	1.05654	0	1.15675	0.76047	0.506379	0.11954	1.26268	GO:0006879; cellular iron ion homeostasis; Biological Process GO:0005576; extracellular region; Cellular Component	IPR010500; Hepcidin	NA	ENSONIG00000000044	-	GL831268.1:35355-35838	12.4865	0	0	0	0	0	0	1.78595
ENSONIT00000000054	ENSONIG00000000045				0.0214084	0.001	0	0	0	0	0	0	0	0	0	0.267841	GO:0006879; cellular iron ion homeostasis; Biological Process GO:0005576; extracellular region; Cellular Component	IPR010500; Hepcidin	NA	ENSONIG00000000045	-	GL831268.1:38291-41062	0.234819	0	0	0.046269	0.0371398	0	0	0.12295
ENSONIT00000000055	ENSONIG00000000046	R-spondin 2 [Source:HGNC Symbol;Acc:28583]		2.5869	2.01092	1.94283	1.1728	13.757	2.43187	1.66856	0.917728	2.9624	0.18548	0.922186	1.91848	1.67673	NA	IPR006212; Furin-like repeat IPR000884; Thrombospondin, type 1 repeat	NA	ENSONIG00000000046	rspo2	GL831268.1:45783-106479	2.25791	1.43114	1.1187	1.625	3.50589	1.79329	0.69965	1.57274
ENSONIT00000000057	ENSONIG00000000047	eukaryotic translation initiation factor 3, subunit E [Source:HGNC Symbol;Acc:3277]		207.615	219.633	235.137	21.2084	16.1377	224.793	356.689	81.2074	218.734	103.226	115.114	70.1996	193.237	GO:0043473; pigmentation; Biological Process GO:0048703; embryonic viscerocranium morphogenesis; Biological Process GO:0043010; camera-type eye development; Biological Process GO:0005515; protein binding; Molecular Function	IPR019010; Eukaryotic translation initiation factor 3 (eIF3), subunit 6, N-terminal IPR000717; Proteasome component (PCI) domain IPR016650; Translation initiation factor 3, subunit 6, eukaryotic	K03250; Genetic Information Processing; Translation; RNA transport [PATH:ko03013] Human Diseases; Infectious Diseases; Hepatitis C [PATH:ko05160]	ENSONIG00000000047	eif3ea	GL831268.1:112185-141135	370.062	245.788	225.796	197.591	182.834	128.084	117.024	93.378
ENSONIT00000000058	ENSONIG00000000048	choline phosphotransferase 1 [Source:HGNC Symbol;Acc:17852]		21.7781	17.5015	15.5795	1.7756	1.61787	16.8099	18.9722	20.4625	17.5053	10.865	11.9944	11.7455	18.8314	GO:0008654; phospholipid biosynthetic process; Biological Process GO:0016020; membrane; Cellular Component GO:0016780; phosphotransferase activity, for other substituted phosphate groups; Molecular Function	IPR000462; CDP-alcohol phosphatidyltransferase IPR014472; Choline/ethanolamine phosphotransferase	K00994; Metabolism; Lipid Metabolism; Glycerophospholipid metabolism [PATH:ko00564] Metabolism; Lipid Metabolism; Ether lipid metabolism [PATH:ko00565] Metabolism; Metabolism of Other Amino Acids; Phosphonate and phosphinate metabolism [PATH:ko00440]	ENSONIG00000000048	chpt1	GL831243.1:2442640-2449076	19.292	23.2817	15.8467	18.7855	23.5903	26.0468	15.4934	9.60962
ENSONIT00000000059	ENSONIG00000000049	ER membrane protein complex subunit 2 [Source:HGNC Symbol;Acc:28963]		19.1045	16.5923	20.0742	2.48952	1.43955	25.3967	20.5866	56.0614	96.6777	52.7021	62.8046	56.5081	84.7096	GO:0005515; protein binding; Molecular Function	IPR019734; Tetratricopeptide repeat IPR013026; Tetratricopeptide repeat-containing domain	NA	ENSONIG00000000049	emc2	GL831268.1:149525-176522	26.4906	26.2187	21.4475	28.8974	34.1101	29.5591	36.2626	38.5157
ENSONIT00000000060	ENSONIG00000000050	N-acetylglucosamine-1-phosphate transferase, alpha and beta subunits [Source:HGNC Symbol;Acc:29670]		6.73718	3.75405	2.78739	0.734202	1.19645	3.10634	3.51225	23.3726	22.5805	12.9754	21.2737	22.2455	28.6848	GO:0030154; cell differentiation; Biological Process GO:0016020; membrane; Cellular Component GO:0005634; nucleus; Cellular Component GO:0008134; transcription factor binding; Molecular Function GO:0016772; transferase activity, transferring phosphorus-containing groups; Molecular Function	IPR000800; Notch domain IPR010506; DMAP1-binding IPR021520; Protein of unknown function DUF3184 IPR018249; EF-HAND 2	K08239; Cellular Processes; Transport and Catabolism; Lysosome [PATH:ko04142]	ENSONIG00000000050	GNPTAB	GL831243.1:2456692-2477366	4.99069	2.3708	3.7183	2.64605	4.49885	4.63391	11.8042	8.48076
ENSONIT00000000061	ENSONIG00000000051	thyrotropin-releasing hormone receptor [Source:HGNC Symbol;Acc:12299]		0.269334	0.149173	0.0961548	0	0.114579	0.159786	0	0	0.583935	0	0.0340832	0	0.0283293	GO:0007186; G-protein coupled receptor signaling pathway; Biological Process GO:0016021; integral to membrane; Cellular Component	IPR000276; GPCR, rhodopsin-like, 7TM IPR019424; 7TM GPCR, olfactory receptor/chemoreceptor Srsx IPR019430; 7TM GPCR, serpentine receptor class x (Srx) IPR019427; 7TM GPCR, serpentine receptor class w (Srw) IPR002120; Thyrotrophin-releasing hormone receptor IPR009144; Thyrotropin-releasing hormone receptor IPR005465; Thyrotropin-releasing hormone receptor 2 IPR017452; GPCR, rhodopsin-like superfam…	K04282; Environmental Information Processing; Signal Transduction; Calcium signaling pathway [PATH:ko04020] Environmental Information Processing; Signaling Molecules and Interaction; G protein-coupled receptors [BR:ko04030] Environmental Information Processing; Signaling Molecules and Interaction; Enzyme-linked receptors [BR:ko01020] Environmental Information Processing; Signaling Molecules and I…	ENSONIG00000000051	trhra	GL831268.1:244797-254554	0.0696594	0.271599	0.108745	0.134463	0.100162	0.197039	0.115784	0.115089
ENSONIT00000000062	ENSONIG00000000052	growth differentiation factor 6 [Source:HGNC Symbol;Acc:4221]		4.07036	3.23662	1.768	2.55852	13.6647	4.48	6.58609	0	0.877353	0.0617989	0.0960177	0.0453336	0.212822	GO:0040007; growth; Biological Process GO:0030510; regulation of BMP signaling pathway; Biological Process GO:0048706; embryonic skeletal system development; Biological Process GO:0060041; retina development in camera-type eye; Biological Process GO:0048264; determination of ventral identity; Biological Process GO:0060059; embryonic retina morphogenesis in camera-type eye; Biological Process GO:0…	IPR001839; Transforming growth factor-beta, C-terminal IPR001111; Transforming growth factor-beta, N-terminal	K04664; Environmental Information Processing; Signal Transduction; TGF-beta signaling pathway [PATH:ko04350] Environmental Information Processing; Signaling Molecules and Interaction; Cytokine-cytokine receptor interaction [PATH:ko04060]	ENSONIG00000000052	gdf6a	GL831268.1:399789-407641	5.00666	6.27437	2.69708	4.23849	0.95275	3.28025	0	0.0372738
ENSONIT00000000064	ENSONIG00000000053	DNA-damage regulated autophagy modulator 1 [Source:HGNC Symbol;Acc:25645]		5.44089	5.32247	4.22627	0	0	7.81306	12.2639	0.54433	0.819973	0.192524	0.658079	0.720268	0.596709	NA	IPR019402; Frag1/DRAM/Sfk1	NA	ENSONIG00000000053	dram1	GL831243.1:2485281-2489048	11.486	6.50409	11.7629	6.8875	8.69857	8.53237	0.0619222	0.19577
ENSONIT00000000065	ENSONIG00000000054	coiled-coil domain containing 53 [Source:HGNC Symbol;Acc:24256]		11.898	9.92692	8.85212	0.098132	0	16.6404	13.8935	60.8172	16.8885	47.0622	69.2727	116.767	22.3354	NA	IPR019309; WASH complex, subunit CCDC53	NA	ENSONIG00000000054	ccdc53	GL831243.1:2493615-2497857	9.54221	8.52215	6.4122	9.53839	9.53085	10.5256	32.5547	6.99018
ENSONIT00000000066	ENSONIG00000000055	syntabulin (syntaxin-interacting) [Source:HGNC Symbol;Acc:26011]		1.13102	1.01198	0.943225	0.0323005	1.79304	6.28097	6.64229	334.446	7.91955	270.722	245.926	282.465	2.97396	GO:0060828; regulation of canonical Wnt receptor signaling pathway; Biological Process GO:2000053; regulation of Wnt receptor signaling pathway involved in dorsal/ventral axis specification; Biological Process GO:0048263; determination of dorsal identity; Biological Process GO:0005515; protein binding; Molecular Function	NA	NA	ENSONIG00000000055	sybu	GL831268.1:416403-423827	5.14042	0.203317	0.514299	0.606146	2.34067	0.313593	72.6806	0.20947
ENSONIT00000000067	ENSONIG00000000056	estrogen receptor binding site associated, antigen, 9 [Source:HGNC Symbol;Acc:3123]		19.9677	16.1261	16.6839	0.288893	1.78187	18.9918	18.9215	23.5105	36.3241	26.8225	19.6115	22.7573	48.9022	NA	IPR017025; Cancer-associated antigen RCAS1	NA	ENSONIG00000000056	ebag9	GL831268.1:427650-432011	27.9064	26.6622	19.6499	21.46	31.6683	33.4638	30.5964	32.675
ENSONIT00000000068	ENSONIG00000000057			2.97378	1.88773	2.03723	0.556965	0.135604	2.40436	2.14614	14.2219	12.8542	9.20352	12.8273	16.5976	11.7347	GO:0005622; intracellular; Cellular Component GO:0008270; zinc ion binding; Molecular Function	IPR007087; Zinc finger, C2H2 IPR015880; Zinc finger, C2H2-like	NA	ENSONIG00000000057	-	GL831243.1:2498613-2505339	1.67999	1.5133	1.40538	1.1965	1.80431	1.71503	4.9774	4.2786
ENSONIT00000000069	ENSONIG00000000058			16.7516	15.5421	12.3905	1.49284	1.20101	15.6719	24.5633	10.5135	19.2038	9.7867	7.14513	7.51127	12.1933	GO:0005515; protein binding; Molecular Function GO:0005543; phospholipid binding; Molecular Function	IPR001849; Pleckstrin homology domain	NA	ENSONIG00000000058	def6c	GL831243.1:2514969-2528569	16.9697	24.4039	10.2675	11.0212	6.44314	11.6676	6.34403	3.28327
ENSONIT00000000070	ENSONIG00000000059	TTK protein kinase [Source:HGNC Symbol;Acc:12401]		4.89489	2.60837	2.91838	0.675999	0.568568	13.3093	8.34782	102.91	111.365	96.6719	101.393	88.9551	100.149	GO:0006468; protein phosphorylation; Biological Process GO:0004672; protein kinase activity; Molecular Function GO:0005524; ATP binding; Molecular Function GO:0004713; protein tyrosine kinase activity; Molecular Function	IPR000719; Protein kinase, catalytic domain IPR001245; Serine-threonine/tyrosine-protein kinase catalytic domain IPR002290; Serine/threonine- / dual-specificity protein kinase, catalytic domain IPR020635; Tyrosine-protein kinase, catalytic domain	K08866; Cellular Processes; Cell Growth and Death; Cell cycle [PATH:ko04110] Cellular Processes; Cell Growth and Death; Cell cycle - yeast [PATH:ko04111]	ENSONIG00000000059	ttk	GL831268.1:432110-442611	4.69684	6.12602	5.14633	2.78273	12.9658	8.94393	80.4706	37.2883
ENSONIT00000000072	ENSONIG00000000060	asteroid homolog 1 (Drosophila) [Source:HGNC Symbol;Acc:25021]		3.76731	1.91874	5.16741	0.504679	6.12835	12.3834	18.9045	0.131639	6.14729	0.428346	1.21531	1.02463	11.328	NA	NA	NA	ENSONIG00000000060	-	AERX01073626.1:342-3069	4.04162	5.36966	7.53438	6.75955	4.62996	13.5084	0.496649	0.551073
ENSONIT00000000073	ENSONIG00000000061	TAF5-like RNA polymerase II, p300/CBP-associated factor (PCAF)-associated factor, 65kDa [Source:HGNC Symbol;Acc:17304]		4.31522	2.96625	3.10081	1.13154	0.951713	10.4439	12.9395	87.0953	27.3231	92.38	105.313	121.215	27.0408	GO:0006355; regulation of transcription, DNA-dependent; Biological Process GO:0005634; nucleus; Cellular Component GO:0005515; protein binding; Molecular Function	IPR001680; WD40 repeat IPR007582; TFIID subunit, WD40-associated region IPR020472; G-protein beta WD-40 repeat IPR017986; WD40-repeat-containing domain	K03130; Genetic Information Processing; Transcription; Basal transcription factors [PATH:ko03022] Human Diseases; Infectious Diseases; Herpes simplex infection [PATH:ko05168]	ENSONIG00000000061	taf5l	GL831280.1:169735-177495	4.61552	4.44992	4.35369	4.07694	6.31035	4.95255	41.2548	10.0698
ENSONIT00000000074	ENSONIG00000000062	branched chain keto acid dehydrogenase E1, beta polypeptide [Source:HGNC Symbol;Acc:987]		83.7258	77.0363	79.0587	5.53799	2.09381	55.0368	70.2886	48.7524	65.029	80.9989	64.9212	69.641	66.3249	GO:0008152; metabolic process; Biological Process GO:0003824; catalytic activity; Molecular Function	IPR005475; Transketolase-like, pyrimidine-binding domain IPR005476; Transketolase, C-terminal	K00167; Metabolism; Amino Acid Metabolism; Valine, leucine and isoleucine degradation [PATH:ko00280]	ENSONIG00000000062	bckdhb	GL831268.1:445918-501624	92.1357	81.0649	55.7953	43.5053	47.6754	45.6488	90.55	32.0584
ENSONIT00000000075	ENSONIG00000000063			3.36076	2.39051	2.03003														ENSONIG00000000063	nup133	GL831280.1:178913-199138	7.34718	6.87861	7.61427	7.11088	12.2867	9.91274	23.4877	8.13266
ENSONIT00000000077	ENSONIG00000000064	family with sequence similarity 46, member A [Source:HGNC Symbol;Acc:18345]		1.92484	1.14521	1.31778	0.51263	46.005	0.377945	1.71096	0.240683	0.362563	0	0.352702	1.17399	0.205211	NA	IPR012937; Domain of unknown function DUF1693	NA	ENSONIG00000000064	FAM46A (1 of many)	GL831268.1:575250-580751	0.845794	2.03999	0.994785	1.62288	2.76406	4.47092	0.350541	0.770205
ENSONIT00000000078	ENSONIG00000000065	inhibitor of Bruton agammaglobulinemia tyrosine kinase [Source:HGNC Symbol;Acc:17853]		26.8348	23.7969	17.006	8.36625	6.94824	15.6696	25.4863	22.1436	39.2704	13.5421	22.3013	20.6829	36.4888	GO:0005515; protein binding; Molecular Function	IPR000408; Regulator of chromosome condensation, RCC1 IPR013069; BTB/POZ IPR002110; Ankyrin repeat IPR000210; BTB/POZ-like IPR020683; Ankyrin repeat-containing domain	NA	ENSONIG00000000065	ibtk	GL831268.1:593273-612730	12.9328	12.432	14.3071	11.7876	15.2385	24.4085	4.18722	10.8271
ENSONIT00000000079	ENSONIG00000000066			12.6776	5.77726	8.44438	2.99848	1.76537	14.0931	69.4088	3.83947	42.5426	7.17014	77.8323	106.072	51.8789	NA	IPR004000; Actin-like	K12314; Organismal Systems; Circulatory System; Cardiac muscle contraction [PATH:ko04260] Human Diseases; Cardiovascular Diseases; Hypertrophic cardiomyopathy (HCM) [PATH:ko05410] Human Diseases; Cardiovascular Diseases; Dilated cardiomyopathy (DCM) [PATH:ko05414]	ENSONIG00000000066	zgc:86725	GL831280.1:203307-208798	2.80395	24.0308	6.61795	31.5492	14.4313	21.0428	0.35151	0.550844
ENSONIT00000000080	ENSONIG00000000067	Rho guanine nucleotide exchange factor (GEF) 37 [Source:HGNC Symbol;Acc:34430]		8.57235	6.81663	8.79144	1.60788	23.4916	7.82885	11.7428	41.8977	36.2007	21.7283	32.9298	37.8413	48.0595	GO:0035023; regulation of Rho protein signal transduction; Biological Process GO:0005622; intracellular; Cellular Component GO:0005737; cytoplasm; Cellular Component GO:0005089; Rho guanyl-nucleotide exchange factor activity; Molecular Function GO:0005515; protein binding; Molecular Function	IPR000219; Dbl homology (DH) domain IPR004148; BAR domain IPR011511; Variant SH3 IPR001452; Src homology-3 domain	NA	ENSONIG00000000067	arhgef37	GL831451.1:162534-171664	9.65156	5.42738	6.97644	3.74359	5.89415	4.95109	13.6981	9.30622
ENSONIT00000000081	ENSONIG00000000068	cell division cycle 6 homolog (S. cerevisiae) [Source:HGNC Symbol;Acc:1744]		3.57632	2.07962	1.32244	14.8171	7.56336	10.7672	6.08777	135.19	25.5364	117.442	108.273	158.123	23.7453	GO:0000166; nucleotide binding; Molecular Function GO:0017111; nucleoside-triphosphatase activity; Molecular Function GO:0005524; ATP binding; Molecular Function	IPR015163; CDC6, C-terminal domain IPR003959; ATPase, AAA-type, core IPR003593; AAA+ ATPase domain IPR016314; Cell division protein Cdc6	K02213; Cellular Processes; Cell Growth and Death; Cell cycle [PATH:ko04110] Cellular Processes; Cell Growth and Death; Cell cycle - yeast [PATH:ko04111] Cellular Processes; Cell Growth and Death; Meiosis - yeast [PATH:ko04113]	ENSONIG00000000068	cdc6	GL831280.1:221118-226353	3.74197	8.22765	6.50637	4.67678	15.2724	11.1193	76.0249	8.7881
ENSONIT00000000083	ENSONIG00000000069			11.6108	13.8243	8.64956	1.38781	34.2194	89.1068	138.692	8.03216	31.4835	4.25554	8.39547	9.88828	30.3235	NA	IPR003590; Leucine-rich repeat, ribonuclease inhibitor subtype IPR007111; NACHT nucleoside triphosphatase	NA	ENSONIG00000000069	-	GL831451.1:247029-260192	9.70324	7.99972	8.5819	5.34843	6.23133	7.43911	0.3545	1.94727
ENSONIT00000000084	ENSONIG00000000070	polymerase (RNA) II (DNA directed) polypeptide B, 140kDa [Source:HGNC Symbol;Acc:9188]		69.5086	57.1811	45.6806	42.829	130.176	53.1123	45.4416	71.2828	100.392	62.6834	66.8989	59.3852	100.037	GO:0006351; transcription, DNA-dependent; Biological Process GO:0003677; DNA binding; Molecular Function GO:0003899; DNA-directed RNA polymerase activity; Molecular Function	IPR007120; DNA-directed RNA polymerase, subunit 2, domain 6 IPR007644; RNA polymerase, beta subunit, protrusion IPR007642; RNA polymerase Rpb2, domain 2 IPR007641; RNA polymerase Rpb2, domain 7 IPR007646; RNA polymerase Rpb2, domain 4 IPR007645; RNA polymerase Rpb2, domain 3 IPR007647; RNA polymerase Rpb2, domain 5	K03010; Metabolism; Nucleotide Metabolism; Purine metabolism [PATH:ko00230] Metabolism; Nucleotide Metabolism; Pyrimidine metabolism [PATH:ko00240] Genetic Information Processing; Transcription; RNA polymerase [PATH:ko03020] Human Diseases; Neurodegenerative Diseases; Huntington's disease [PATH:ko05016] Human Diseases; Infectious Diseases; Epstein-Barr virus infection [PATH:ko05169]	ENSONIG00000000070	polr2b	GL831451.1:301623-332095	37.6447	34.867	28.6777	27.2039	46.856	33.1956	70.3358	32.5663
ENSONIT00000000085	ENSONIG00000000071	ubiquitin protein ligase E3D [Source:HGNC Symbol;Acc:21381]		17.8931	17.1593	15.5433	1.07921	0	10.3957	8.35484	22.0372	25.0792	23.713	20.5784	20.9592	23.8051	NA	IPR019193; Ubiquitin-conjugating enzyme E2C-binding protein	NA	ENSONIG00000000071	ube3d	GL831268.1:648878-667869	14.962	10.5233	10.7737	8.8771	18.0258	8.21034	66.3106	22.689
ENSONIT00000000086	ENSONIG00000000072	dopey family member 1 [Source:HGNC Symbol;Acc:21194]		6.14679	5.18798	3.14849	3.78046	3.75024	3.92532	4.76671	24.3892	52.7624	14.2781	29.941	28.5154	55.0575	NA	IPR007249; Dopey, N-terminal	NA	ENSONIG00000000072	dopey1	GL831268.1:668711-696938	3.46898	2.96376	4.09964	2.99305	4.24265	4.23477	16.2831	18.681
ENSONIT00000000087	ENSONIG00000000073	WAS/WASL interacting protein family, member 2 [Source:HGNC Symbol;Acc:30923]		10.8544	12.7008	8.24181	3.41982	4.21177	22.696	29.1687	121.082	45.547	105.436	99.3725	127.638	51.4578	GO:0003779; actin binding; Molecular Function	IPR003124; WH2 domain	NA	ENSONIG00000000073	wipf2a	GL831280.1:259913-272279	7.44086	5.47884	5.63882	3.37508	3.30093	4.52443	17.9129	6.08423
ENSONIT00000000088	ENSONIG00000000074			5.86401	5.87358	5.55754														ENSONIG00000000074	igfbp7	GL831451.1:332709-342224	18.2867	40.6664	54.5053	47.4445	72.6151	154.562	4.26048	22.1057
ENSONIT00000000090	ENSONIG00000000075	cryptochrome 1 (photolyase-like) [Source:HGNC Symbol;Acc:2384]		32.8375	31.3482	23.884	0.979765	0.302155	27.7201	46.5548	17.378	26.948	21.2883	19.7063	23.8861	30.443	GO:0006281; DNA repair; Biological Process GO:0003913; DNA photolyase activity; Molecular Function	IPR005101; DNA photolyase, FAD-binding/Cryptochrome, C-terminal IPR006050; DNA photolyase, N-terminal	K02295; Organismal Systems; Environmental Adaptation; Circadian rhythm - mammal [PATH:ko04710]	ENSONIG00000000075	cry1aa	GL831243.1:32385-48822	32.4062	31.6728	26.2047	16.7605	19.4524	22.2042	12.6771	15.7134
ENSONIT00000000091	ENSONIG00000000076	synaptotagmin X [Source:HGNC Symbol;Acc:19266]		0.385303	0.158387	0.126258	0.226874	0.61221	0.557556	0.468173	0.650949	1.4263	0.368374	1.79509	0.442189	0.886578	GO:0005515; protein binding; Molecular Function	IPR000008; C2 calcium-dependent membrane targeting IPR001565; Synaptotagmin IPR020477; C2 domain IPR018029; C2 membrane targeting protein	NA	ENSONIG00000000076	syt10	GL831243.1:83684-102371	0.392992	0.343181	0.257361	0.256791	0.201487	0.169128	0.494144	1.27079
ENSONIT00000000092	ENSONIG00000000077	myogenic factor 5 [Source:HGNC Symbol;Acc:7565]		2.11637	1.5629	3.29348	0	0.393925	0.0784783	0.137525	0	0.401516	0.0754185	0.0585893	0	0.0486983	GO:0006355; regulation of transcription, DNA-dependent; Biological Process GO:0007517; muscle organ development; Biological Process GO:0055002; striated muscle cell development; Biological Process GO:0007519; skeletal muscle tissue development; Biological Process GO:0048741; skeletal muscle fiber development; Biological Process GO:0002074; extraocular skeletal muscle development; Biological Proce…	IPR022032; Myogenic determination factor 5 IPR002546; Myogenic basic muscle-specific protein IPR011598; Helix-loop-helix DNA-binding	NA	ENSONIG00000000077	myf5	GL831243.1:705568-708716	0.268678	0.247943	0.147719	0.101731	0.0941338	0.0339474	0.0824161	0.322362
ENSONIT00000000093	ENSONIG00000000078	lin-7 homolog A (C. elegans) [Source:HGNC Symbol;Acc:17787]		11.0281	11.0021	7.78829	0.652733	0	9.88259	8.93518	0.437804	3.95702	0.660679	1.21898	2.22637	3.7328	GO:0005515; protein binding; Molecular Function	IPR001478; PDZ domain IPR014775; L27, C-terminal IPR004172; L27	NA	ENSONIG00000000078	lin7a	GL831243.1:723219-743713	9.77751	11.4333	6.90908	5.37905	10.0951	7.68044	0.534112	0.680975
ENSONIT00000000094	ENSONIG00000000079	acyl-CoA synthetase short-chain family member 3 [Source:HGNC Symbol;Acc:24723]		10.7217	11.3158	8.42591	0.148257	0.822992	8.82638	10.8862	5.70783	8.80793	4.88451	6.36508	3.97321	8.49537	GO:0008152; metabolic process; Biological Process GO:0003824; catalytic activity; Molecular Function	IPR000873; AMP-dependent synthetase/ligase IPR024597; Acyl-CoA synthase, domain of unknown function DUF3448	K01908; Metabolism; Carbohydrate Metabolism; Propanoate metabolism [PATH:ko00640]	ENSONIG00000000079	acss3	GL831243.1:768726-815383	10.0373	12.6855	7.97923	10.1198	11.9132	16.9247	6.76406	2.96077
ENSONIT00000000095	ENSONIG00000000080	protein tyrosine phosphatase, receptor type, f polypeptide (PTPRF), interacting protein (liprin), alpha 2 [Source:HGNC Symbol;Acc:9246]		1.02423	0.48936	0.537855	1.80034	13.3009	0.652388	0.649248	7.9056	2.14278	4.86855	6.73454	16.8634	1.80923	GO:0005515; protein binding; Molecular Function	IPR021129; Sterile alpha motif, type 1 IPR011510; Sterile alpha motif, type 2 IPR001660; Sterile alpha motif domain	NA	ENSONIG00000000080	ppfia2	GL831243.1:821453-995200	0.952295	1.63488	0.627302	0.643918	0.258022	0.269481	2.52925	0.873966
ENSONIT00000000097	ENSONIG00000000081			2.23161	0.618245	1.06903	0	0	3.36235	1.55398	23.9691	0.472601	33.5376	29.3503	24.2439	0.366848	GO:0003333; amino acid transmembrane transport; Biological Process GO:0006810; transport; Biological Process GO:0055085; transmembrane transport; Biological Process GO:0016020; membrane; Cellular Component GO:0015171; amino acid transmembrane transporter activity; Molecular Function	IPR004841; Amino acid permease domain IPR002293; Amino acid/polyamine transporter I	NA	ENSONIG00000000081	si:ch73-352p4.8 (1 of many)	GL831243.1:1037163-1043954	6.01639	4.25196	1.64728	3.47565	2.34814	0.648668	36.8917	7.10491
ENSONIT00000000098	ENSONIG00000000082		WDS-Tilapia-FOXm1a	6.119	3.5389	2.77829	0.685021	2.64072	9.89044	7.9899	78.1721	78.3256	68.4043	81.3797	73.2103	85.7595	NA	NA	NA	ENSONIG00000000082	-	GL831243.1:1052408-1055819	1.36977	1.40706	0.920526	0.593736	2.69925	2.40117	19.4201	16.958
ENSONIT00000000099	ENSONIG00000000083	RAD9-HUS1-RAD1 interacting nuclear orphan 1 [Source:HGNC Symbol;Acc:28206]		6.69382	2.9833	3.79093	0.0693863	0	15.3469	9.8984	96.2117	44.3303	119.801	127.13	149.471	45.4337	NA	NA	NA	ENSONIG00000000083	-	GL831243.1:1056829-1057879	2.03911	2.50676	2.50514	2.21947	6.8908	7.03176	104.184	16.5704
ENSONIT00000000100	ENSONIG00000000084	tubby like protein 3 [Source:HGNC Symbol;Acc:12425]		9.35442	6.29391	7.21347	0	1.1128	4.17523	7.07923	0.878447	29.3958	1.10076	8.08236	1.42611	38.5649	NA	IPR000007; Tubby, C-terminal IPR005398; Tubby, N-terminal	NA	ENSONIG00000000084	TULP3	GL831243.1:1072276-1083811	5.21838	5.55635	2.43006	3.21135	3.3301	3.81573	0.62176	10.2834
ENSONIT00000000101	ENSONIG00000000085	tripartite motif containing 35 [Source:HGNC Symbol;Acc:16285]		7.79005	5.64555	6.36355	0.341329	0.19737	10.5772	12.0813	56.4235	4.82817	59.345	47.9959	50.1861	6.61229	GO:0005622; intracellular; Cellular Component GO:0008270; zinc ion binding; Molecular Function GO:0005515; protein binding; Molecular Function	IPR003877; SPla/RYanodine receptor SPRY IPR000315; Zinc finger, B-box IPR018957; Zinc finger, C3HC4 RING-type IPR001841; Zinc finger, RING-type IPR006574; SPRY-associated IPR018355; SPla/RYanodine receptor subgroup IPR003879; Butyrophylin-like IPR001870; B30.2/SPRY domain	NA	ENSONIG00000000085	-	GL831243.1:1090460-1092526	6.50089	4.73541	10.329	5.60542	8.698	9.91143	56.3894	2.04129
ENSONIT00000000102	ENSONIG00000000086	pleiotrophin [Source:HGNC Symbol;Acc:9630]		11.597	3.6489	5.41923	30.7828	2.38325	4.98533	4.71481	0.403145	2.12552	0.456282	0.620314	0.188276	0.441937	GO:0007399; nervous system development; Biological Process GO:0008083; growth factor activity; Molecular Function	IPR020089; Midkine heparin-binding growth factor, N-terminal IPR020090; Midkine heparin-binding growth factor, C-terminal IPR000762; Midkine heparin-binding growth factor	NA	ENSONIG00000000086	ptn	GL831243.1:1160308-1173842	1.6405	6.10413	1.75088	7.48218	4.62036	3.08304	0.254896	0
ENSONIT00000000103	ENSONIG00000000087	myotrophin [Source:HGNC Symbol;Acc:15667]		29.6059	25.9287	25.9618	8.13918	4.00546	77.8821	78.4015	33.0646	87.7768	22.9291	57.1911	49.4475	118.246	GO:0005515; protein binding; Molecular Function	IPR002110; Ankyrin repeat IPR020683; Ankyrin repeat-containing domain	NA	ENSONIG00000000087	mtpn	GL831243.1:1402531-1420291	42.8416	57.6412	50.2343	51.5063	65.4908	61.2796	21.6366	37.6475
ENSONIT00000000104	ENSONIG00000000088	family with sequence similarity 180, member A [Source:HGNC Symbol;Acc:33773]		0.123751	0.0577186	0.190315	0	13.0511	0.282615	5.21667	0	0	0.217277	0.421983	0.358621	1.05223	NA	NA	NA	ENSONIG00000000088	FAM180A (1 of many)	GL831243.1:1462658-1472815	0.357632	0.125224	0.207646	0.699501	0.247233	2.09091	0	0.117178
ENSONIT00000000105	ENSONIG00000000089	sema domain, immunoglobulin domain (Ig), short basic domain, secreted, (semaphorin) 3C [Source:HGNC Symbol;Acc:10725]		1.3889	1.0479	1.11286	0.142911	0.528876	2.10727	3.16962	5.41254	86.2507	3.45534	24.5028	7.95233	89.7033	GO:0005515; protein binding; Molecular Function	IPR001627; Semaphorin/CD100 antigen IPR013106; Immunoglobulin V-set IPR003659; Plexin/semaphorin/integrin IPR003599; Immunoglobulin subtype IPR007110; Immunoglobulin-like	K06840; Organismal Systems; Development; Axon guidance [PATH:ko04360]	ENSONIG00000000089	sema3c	GL831243.1:1520465-1542878	5.35407	3.83641	2.29065	4.86621	4.43662	7.90557	1.14208	40.6168
ENSONIT00000000106	ENSONIG00000000090	CD36 molecule (thrombospondin receptor) [Source:HGNC Symbol;Acc:1663]		0.118307	0.173421	0.163377	0	0	0.3442	0.756925	0.137533	1.34666	0.0389153	0.332547	0.0856408	0.452303	GO:0007155; cell adhesion; Biological Process GO:0034694; response to prostaglandin stimulus; Biological Process GO:0033552; response to vitamin B3; Biological Process GO:0016020; membrane; Cellular Component	IPR002159; CD36 antigen IPR005428; Adhesion molecule CD36 IPR005429; Lysosome membrane protein II	K06259; Environmental Information Processing; Signaling Molecules and Interaction; Cytokines [BR:ko04052] Environmental Information Processing; Signaling Molecules and Interaction; ECM-receptor interaction [PATH:ko04512] Cellular Processes; Transport and Catabolism; Phagosome [PATH:ko04145] Organismal Systems; Immune System; Hematopoietic cell lineage [PATH:ko04640] Organismal Systems; Endocrine …	ENSONIG00000000090	cd36	GL831243.1:1545555-1553043	0.484272	0.23888	0.212605	0.238123	3.30673	0.342045	0.125869	0.813526
ENSONIT00000000108	ENSONIG00000000091			44.0181	43.3726	40.1729	0.638549	0.671337	50.5555	50.9059	76.7678	92.7875	55.6021	87.8275	94.7567	97.0353	GO:0007186; G-protein coupled receptor signaling pathway; Biological Process GO:0004871; signal transducer activity; Molecular Function GO:0019001; guanyl nucleotide binding; Molecular Function GO:0005525; GTP binding; Molecular Function	IPR001019; Guanine nucleotide binding protein (G-protein), alpha subunit IPR006689; Small GTPase superfamily, ARF/SAR type IPR001408; G-protein alpha subunit, group I IPR002975; Fungal G-protein, alpha subunit	K04630; Cellular Processes; Cell Communication; Tight junction [PATH:ko04530] Cellular Processes; Cell Communication; Gap junction [PATH:ko04540] Organismal Systems; Immune System; Leukocyte transendothelial migration [PATH:ko04670] Organismal Systems; Immune System; Chemokine signaling pathway [PATH:ko04062] Organismal Systems; Endocrine System; Progesterone-mediated oocyte maturation [PATH:ko04…	ENSONIG00000000091	gnai1	GL831243.1:1556451-1571989	53.4332	39.0531	47.065	45.0149	77.1529	52.5129	65.419	60.6194
ENSONIT00000000109	ENSONIG00000000092			2.32157	2.33984	1.49613														ENSONIG00000000092	magi2a	GL831243.1:1742563-1928974	3.07634	3.69737	1.26361	2.12663	1.22801	2.74869	0.293611	1.07704
ENSONIT00000000111	ENSONIG00000000093			7.63271	7.94054	5.15692	0	0	4.14319	7.5461	2.97169	10.533	0.865575	2.80498	1.25177	7.34566	GO:0005622; intracellular; Cellular Component GO:0008270; zinc ion binding; Molecular Function	IPR007087; Zinc finger, C2H2 IPR015880; Zinc finger, C2H2-like	NA	ENSONIG00000000093	-	AERX01071771.2:9-5216	1.63638	1.42011	0.871529	0.647764	0.987785	1.0175	0.475726	7.76259
ENSONIT00000000112	ENSONIG00000000094	fatty acyl CoA reductase 2 [Source:HGNC Symbol;Acc:25531]		7.72293	11.9753	5.56186	0.822813	5.19038	7.99653	11.8588	35.0611	11.4625	24.0645	30.5445	58.7357	9.90282	GO:0044237; cellular metabolic process; Biological Process GO:0009058; biosynthetic process; Biological Process GO:0055114; oxidation-reduction process; Biological Process GO:0003824; catalytic activity; Molecular Function GO:0050662; coenzyme binding; Molecular Function GO:0016620; oxidoreductase activity, acting on the aldehyde or oxo group of donors, NAD or NADP as acceptor; Molecular Function	IPR013120; Male sterility, NAD-binding IPR004262; Male sterility IPR001509; NAD-dependent epimerase/dehydratase IPR003869; Polysaccharide biosynthesis protein CapD-like	K13356; Metabolism; Lipid Metabolism; Cutin, suberine and wax biosynthesis [PATH:ko00073] Cellular Processes; Transport and Catabolism; Peroxisome [PATH:ko04146]	ENSONIG00000000094	si:dkey-97m3.1	GL831243.1:1941682-1996321	18.2055	6.27792	4.73443	4.53772	4.53999	5.2865	13.2862	2.94906
ENSONIT00000000113	ENSONIG00000000095	ERGIC and golgi 2 [Source:HGNC Symbol;Acc:30208]		2.66009	1.00126	1.03896	0.0542308	0.62717	0.749674	0.700653	0.594108	3.96338	0.0960593	0.970116	0.0264247	3.84563	NA	IPR012936; Domain of unknown function DUF1692	NA	ENSONIG00000000095	si:ch211-225b10.3	GL831243.1:2000340-2004992	1.3952	0.658521	0.396267	0.341884	0.751107	0.241311	0.396072	2.2158
ENSONIT00000000114	ENSONIG00000000096	jumonji C domain containing histone demethylase 1 homolog D (S. cerevisiae) [Source:HGNC Symbol;Acc:22224]		6.05457	8.82979	5.19038	0.195334	0.790651	5.4455	9.33236	7.10757	24.119	5.51431	13.2043	12.6231	36.0252	GO:0005515; protein binding; Molecular Function GO:0008270; zinc ion binding; Molecular Function	IPR003347; JmjC domain IPR019787; Zinc finger, PHD-finger IPR001965; Zinc finger, PHD-type	NA	ENSONIG00000000096	kdm7aa	GL831243.1:2008397-2036880	5.99244	4.20353	3.26219	3.71527	3.43823	3.82164	1.81255	7.77688
ENSONIT00000000115	ENSONIG00000000097	myeloid/lymphoid or mixed-lineage leukemia 5 (trithorax homolog, Drosophila) [Source:HGNC Symbol;Acc:18541]		12.428	12.0372	7.88887	11.3181	14.1351	23.1056	40.2989	43.7165	108.681	30.066	63.2393	56.6724	146.363	GO:0005515; protein binding; Molecular Function GO:0008270; zinc ion binding; Molecular Function	IPR001214; SET domain IPR019787; Zinc finger, PHD-finger IPR001965; Zinc finger, PHD-type	K09189; Metabolism; Amino Acid Metabolism; Lysine degradation [PATH:ko00310]	ENSONIG00000000097	kmt2e	GL831243.1:2058195-2077950	19.7725	16.9907	16.771	11.4674	13.5746	16.8355	11.0739	29.1485
ENSONIT00000000118	ENSONIG00000000098			0.313434	0.0696134	0.157396														ENSONIG00000000098	lhfpl3	GL831243.1:2083059-2137469	0.169743	0.130274	0.0640873	0.172448	0.361273	0.294286	2.56162	0.0868773
ENSONIT00000000120	ENSONIG00000000099	origin recognition complex, subunit 5 [Source:HGNC Symbol;Acc:8491]		8.51886	4.46608	4.97637	22.8256	12.3972	8.30357	4.50214	55.3194	75.3806	70.8976	53.2811	52.6385	62.9414	NA	NA	K02607; Cellular Processes; Cell Growth and Death; Cell cycle [PATH:ko04110] Cellular Processes; Cell Growth and Death; Cell cycle - yeast [PATH:ko04111] Cellular Processes; Cell Growth and Death; Meiosis - yeast [PATH:ko04113]	ENSONIG00000000099	orc5	GL831243.1:2139223-2150050	4.09045	3.70648	3.43881	4.29218	12.4781	7.02768	94.468	39.0305
ENSONIT00000000121	ENSONIG00000000100	COX18 cytochrome c oxidase assembly homolog (S. cerevisiae) [Source:HGNC Symbol;Acc:26801]		13.3792	12.177	12.7577	1.88525	0.300725	10.065	10.8837	3.15394	28.1998	4.05904	7.96149	3.16763	26.1724	GO:0051205; protein insertion into membrane; Biological Process GO:0016021; integral to membrane; Cellular Component	IPR001708; Membrane insertion protein, OxaA/YidC	NA	ENSONIG00000000100	cox18	GL831451.1:346052-354691	10.512	6.80524	6.68724	5.89757	10.6955	9.03974	17.3398	10.5365
ENSONIT00000000122	ENSONIG00000000101			76.2209	68.8106	82.4944	15.6205	3.70002	83.6418	82.9746	56.8452	134.436	88.5895	92.1286	81.7983	154.389	GO:0045454; cell redox homeostasis; Biological Process GO:0008430; selenium binding; Molecular Function	IPR011893; Selenoprotein, Rdx type	NA	ENSONIG00000000101	selt2	GL831451.1:363501-372993	42.9725	39.3418	32.4459	29.5213	52.8586	41.1288	111.916	75.5687
ENSONIT00000000123	ENSONIG00000000102	aminopeptidase puromycin sensitive [Source:HGNC Symbol;Acc:7900]		32.3073	27.9685	20.1766	1.34398	1.74517	14.3307	15.3458	33.1741	60.3124	15.9333	37.1175	30.4114	54.4753	GO:0008152; metabolic process; Biological Process GO:0008237; metallopeptidase activity; Molecular Function GO:0008270; zinc ion binding; Molecular Function	IPR014782; Peptidase M1, membrane alanine aminopeptidase, N-terminal	NA	ENSONIG00000000102	npepps	GL831280.1:289647-316879	28.5163	19.5803	15.2927	14.0997	14.6482	20.6454	27.6091	21.3046
ENSONIT00000000124	ENSONIG00000000103	sequestosome 1 [Source:HGNC Symbol;Acc:11280]		17.9593	28.0935	34.4346	22.3525	23.4507	88.3095	135.51	40.0008	67.4832	30.5719	29.8173	34.9036	51.7785	GO:0005515; protein binding; Molecular Function GO:0008270; zinc ion binding; Molecular Function	IPR000433; Zinc finger, ZZ-type IPR000270; Phox/Bem1p IPR015940; Ubiquitin-associated/translation elongation factor EF1B, N-terminal, eukaryote	K14381; Organismal Systems; Development; Osteoclast differentiation [PATH:ko04380]	ENSONIG00000000103	sqstm1	GL831451.1:382844-386180	131.779	32.293	71.5976	37.7234	37.0145	32.2322	28.2292	20.9149
ENSONIT00000000126	ENSONIG00000000104	synaptosomal-associated protein, 91kDa homolog (mouse) [Source:HGNC Symbol;Acc:14986]		1.87315	0.838709	0.574644	2.01274	3.80896	1.60197	1.19432	0.60852	1.77941	0.729241	0.802563	3.07594	3.87165	GO:0005543; phospholipid binding; Molecular Function	IPR011417; ANTH IPR001026; Epsin domain, N-terminal IPR013809; Epsin-like, N-terminal	NA	ENSONIG00000000104	snap91	GL831268.1:698098-750932	0.33958	0.455243	0.589579	0.198981	1.27096	0.379663	0.982384	1.11759
ENSONIT00000000127	ENSONIG00000000105			7.85367	8.41815	7.18199														ENSONIG00000000105	TBC1D9B	GL831451.1:413435-427508	19.8254	14.2736	13.7985	9.19638	10.4382	10.4261	15.6557	6.53839
ENSONIT00000000129	ENSONIG00000000106	malic enzyme 1, NADP(+)-dependent, cytosolic [Source:HGNC Symbol;Acc:6983]		10.6741	16.265	17.4462	1.00176	0.331007	5.47332	12.1337	0.615915	32.7263	0.728783	10.9293	1.98736	37.1555	GO:0055114; oxidation-reduction process; Biological Process GO:0016616; oxidoreductase activity, acting on the CH-OH group of donors, NAD or NADP as acceptor; Molecular Function GO:0051287; NAD binding; Molecular Function	IPR012302; Malic enzyme, NAD-binding IPR012301; Malic enzyme, N-terminal IPR001891; Malic oxidoreductase	NA	ENSONIG00000000106	me1	GL831268.1:807469-859564	12.432	5.21338	7.02487	5.384	5.63706	11.4146	1.65537	12.9469
ENSONIT00000000130	ENSONIG00000000107	mitochondrial ribosomal protein L45 [Source:HGNC Symbol;Acc:16651]		35.3761	33.1801	37.0572	2.47814	1.35755	35.279	28.331	61.8495	73.0289	91.1408	63.5346	58.4371	71.8288	GO:0006886; intracellular protein transport; Biological Process GO:0005744; mitochondrial inner membrane presequence translocase complex; Cellular Component GO:0015450; P-P-bond-hydrolysis-driven protein transmembrane transporter activity; Molecular Function	IPR007379; Membrane transporter, Tim44-related/Ribosomal protein L45	NA	ENSONIG00000000107	mrpl45	GL831280.1:319166-328819	44.9524	35.5175	28.3192	29.9141	39.0465	29.8679	113.097	40.1292
ENSONIT00000000131	ENSONIG00000000108	ring finger protein 130 [Source:HGNC Symbol;Acc:18280]		21.12	11.2834	8.63045	1.42631	4.55035	23.2298	26.556	22.63	12.2908	16.5089	14.2125	24.6601	13.5288	GO:0005515; protein binding; Molecular Function GO:0008270; zinc ion binding; Molecular Function	IPR003137; Protease-associated domain, PA IPR018957; Zinc finger, C3HC4 RING-type IPR001841; Zinc finger, RING-type	NA	ENSONIG00000000108	rnf130	GL831451.1:436493-477283	11.6307	14.2178	16.1128	9.81618	14.5079	12.9894	7.10332	2.97266
ENSONIT00000000133	ENSONIG00000000109	G protein-coupled receptor 179 [Source:HGNC Symbol;Acc:31371]		0.445735	0.23588	0.184555	0.582998	6.3905	0.0934404	0.573105	5.75212	0.239033	1.80717	3.66237	5.07627	0.0579828	GO:0007186; G-protein coupled receptor signaling pathway; Biological Process GO:0016021; integral to membrane; Cellular Component GO:0004930; G-protein coupled receptor activity; Molecular Function	IPR017978; GPCR, family 3, C-terminal	NA	ENSONIG00000000109	-	GL831280.1:330444-358774	0.0231553	0.107101	0.221712	0.0573085	0.158369	0.200168	5.11183	0.0738207
ENSONIT00000000134	ENSONIG00000000110	coagulation factor II (thrombin) receptor-like 3 [Source:HGNC Symbol;Acc:3540]		2.89536	2.46801	1.38188	4.12154	5.81674	2.70391	5.64085	0.874619	6.09351	0.0928031	0.672883	1.56578	2.91629	GO:0007186; G-protein coupled receptor signaling pathway; Biological Process GO:0016021; integral to membrane; Cellular Component	IPR000276; GPCR, rhodopsin-like, 7TM IPR019426; 7TM GPCR, serpentine receptor class v (Srv) IPR003944; Protease-activated receptor 4 IPR002286; P2 purinoceptor IPR003912; Protease-activated receptor IPR017452; GPCR, rhodopsin-like superfamily	K04236; Environmental Information Processing; Signaling Molecules and Interaction; G protein-coupled receptors [BR:ko04030] Environmental Information Processing; Signaling Molecules and Interaction; Enzyme-linked receptors [BR:ko01020] Environmental Information Processing; Signaling Molecules and Interaction; Cytokine receptors [BR:ko04050] Environmental Information Processing; Signaling Molecule…	ENSONIG00000000110	si:ch211-132p1.2	GL831451.1:482114-483383	2.8858	3.29794	2.26251	2.64022	1.99862	4.26996	0.375764	0.862115
ENSONIT00000000135	ENSONIG00000000111	ArfGAP with RhoGAP domain, ankyrin repeat and PH domain 3 [Source:HGNC Symbol;Acc:24097]		5.68712	4.85756	3.4436	0.191255	2.32242	6.158	11.5184	0.879248	9.72232	0.640488	2.5084	1.71822	8.66102	GO:0007165; signal transduction; Biological Process GO:0032312; regulation of ARF GTPase activity; Biological Process GO:0005622; intracellular; Cellular Component GO:0008060; ARF GTPase activator activity; Molecular Function GO:0008270; zinc ion binding; Molecular Function GO:0005515; protein binding; Molecular Function GO:0005543; phospholipid binding; Molecular Function	IPR000198; Rho GTPase-activating protein domain IPR001849; Pleckstrin homology domain IPR001164; Arf GTPase activating protein IPR021129; Sterile alpha motif, type 1 IPR000159; Ras-association IPR011510; Sterile alpha motif, type 2 IPR001660; Sterile alpha motif domain	K12490; Cellular Processes; Transport and Catabolism; Endocytosis [PATH:ko04144]	ENSONIG00000000111	arap3	GL831451.1:495489-565510	4.20176	5.31858	7.65529	3.42406	4.96934	5.51335	0.651354	4.42036
ENSONIT00000000137	ENSONIG00000000112	PR domain containing 13 [Source:HGNC Symbol;Acc:13998]		1.55293	0.242418	0.0891233	1.57261	24.6282	0	0.405651	0	0.0772391	0	0	0	0.0374722	GO:0005622; intracellular; Cellular Component GO:0005515; protein binding; Molecular Function GO:0008270; zinc ion binding; Molecular Function	IPR015880; Zinc finger, C2H2-like IPR001214; SET domain IPR007087; Zinc finger, C2H2	NA	ENSONIG00000000112	prdm13	GL831268.1:904332-911334	0	0.0148883	0.0368757	0.0127947	0	0	0	0.00641407
ENSONIT00000000138	ENSONIG00000000113			0.0768067	0.0788112	0.128245	0.817543	39.0579	0.0259805	0	2.51483	0	1.37321	0.911621	0.109892	0.628748	GO:0005882; intermediate filament; Cellular Component	IPR016044; Filament IPR006821; Intermediate filament head, DNA-binding domain	NA	ENSONIG00000000113	zgc:172323	GL831268.1:917115-921443	0.553204	0.146108	0.0620973	0.0504827	0.375079	0.026014	1.14941	0.241885
ENSONIT00000000140	ENSONIG00000000114	suppressor of cytokine signaling 7 [Source:HGNC Symbol;Acc:29846]		1.2168	0.870106	0.964369	0.766656	1.70232	0.0423923	0.412711	0	0.578374	0.0271596	0.0421983	0.0896552	0.0526116	GO:0035556; intracellular signal transduction; Biological Process GO:0005515; protein binding; Molecular Function	IPR001496; SOCS protein, C-terminal IPR000980; SH2 domain	K04699; Environmental Information Processing; Signal Transduction; Jak-STAT signaling pathway [PATH:ko04630]	ENSONIG00000000114	socs7	GL831280.1:368604-387983	0.10707	0.385232	0.169413	0.117146	0.0854177	0.199425	0.217554	0.307591
ENSONIT00000000141	ENSONIG00000000115			3.49877	2.60666	3.12543	2.14416	50.1446	8.56275	5.89953	158.834	13.199	109.719	132.115	133.556	10.1501	NA	IPR001763; Rhodanese-like	NA	ENSONIG00000000115	si:dkey-165n16.1	GL831268.1:923448-926259	3.95864	3.73455	5.91575	6.27488	7.40913	4.56271	102.794	7.33123
ENSONIT00000000142	ENSONIG00000000116			1.75039	1.45421	0.560814														ENSONIG00000000116	usp45	GL831268.1:928166-959767	5.04503	4.81046	4.71653	3.88538	6.0463	4.47875	14.0995	4.07205
ENSONIT00000000144	ENSONIG00000000117	Sp2 transcription factor [Source:HGNC Symbol;Acc:11207]		9.76001	8.09614	5.45634	0.878362	8.67346	8.73309	14.6218	12.2133	17.9201	4.95178	10.3434	18.7165	19.4549	GO:0005622; intracellular; Cellular Component GO:0008270; zinc ion binding; Molecular Function	IPR007087; Zinc finger, C2H2 IPR015880; Zinc finger, C2H2-like	NA	ENSONIG00000000117	sp2	GL831280.1:393487-404835	5.09572	4.12242	3.1677	2.7586	2.7327	5.11493	1.8953	3.44432
ENSONIT00000000145	ENSONIG00000000118			1.00407	0.884582	1.05394	0	0.361098	7.51757	5.46279	3.05413	1.10417	2.55794	2.09457	6.65622	1.07136	NA	IPR002913; Lipid-binding START	NA	ENSONIG00000000118	si:dkeyp-110e4.11	GL831451.1:570604-585300	2.85167	1.66141	8.1628	5.86415	10.7159	8.25777	4.57182	0.329816
ENSONIT00000000146	ENSONIG00000000119	ATP-binding cassette, sub-family C (CFTR/MRP), member 10 [Source:HGNC Symbol;Acc:52]		4.13096	1.93631	1.35133	0.49327	1.90153	1.04808	1.74814	0.600428	3.35949	0.266973	0.961582	0.687675	4.05109	GO:0006810; transport; Biological Process GO:0055085; transmembrane transport; Biological Process GO:0016021; integral to membrane; Cellular Component GO:0005524; ATP binding; Molecular Function GO:0042626; ATPase activity, coupled to transmembrane movement of substances; Molecular Function GO:0016887; ATPase activity; Molecular Function GO:0000166; nucleotide binding; Molecular Function GO:00171…	IPR001140; ABC transporter, transmembrane domain IPR003439; ABC transporter-like IPR003593; AAA+ ATPase domain IPR017940; ABC transporter, integral membrane type 1	K05674; Environmental Information Processing; Membrane Transport; Transporters [BR:ko02000] Environmental Information Processing; Membrane Transport; Solute carrier family [BR:ko02001] Environmental Information Processing; Membrane Transport; ABC transporters [PATH:ko02010]	ENSONIG00000000119	-	GL831280.1:409939-425315	1.88509	2.37468	1.91169	1.96851	2.55004	2.63812	0.740393	3.41126
ENSONIT00000000147	ENSONIG00000000120	PNN-interacting serine/arginine-rich protein [Source:HGNC Symbol;Acc:21222]		21.3492	13.6338	11.4869	47.794	49.9704	85.8762	174.816	242.257	177.473	295.551	170.246	159.108	192.194	NA	NA	NA	ENSONIG00000000120	pnisr	GL831268.1:966473-972901	40.8976	47.8284	68.0849	37.206	37.1876	41.2545	89.1196	56.6365
ENSONIT00000000149	ENSONIG00000000121	family with sequence similarity 98, member A [Source:HGNC Symbol;Acc:24520]		0.957216	0.549481	0.533835	2.70162	5.66748	14.1859	7.81292	55.6536	64.8766	44.0145	30.9941	28.3792	89.2857	NA	IPR018797; Uncharacterised protein family FAM98	NA	ENSONIG00000000121	-	GL832371.1:5558-9104	0	0.0284131	0.0448126	0	0.0263314	0	0.0447015	0.128573
ENSONIT00000000150	ENSONIG00000000122			3.81242	2.91128	2.39778	0.104608	0.483908	1.71119	3.35063	0.900424	2.09624	0.416907	0.611768	1.09589	1.22636	GO:0005622; intracellular; Cellular Component GO:0008270; zinc ion binding; Molecular Function	IPR007087; Zinc finger, C2H2 IPR015880; Zinc finger, C2H2-like	NA	ENSONIG00000000122	-	GL832133.1:1754-4246	0.420594	0.317563	0.168654	0.0848922	0.0649106	0.138901	0.38454	0.967566
ENSONIT00000000151	ENSONIG00000000123			0.0914683			0.255997	0	0	0.275619	0.400641	0	0.283405	0.176132	0	0	GO:0005488; binding; Molecular Function	IPR001304; C-type lectin IPR008646; Herpesvirus UL45-like IPR002353; Type II antifreeze protein IPR003990; Pancreatitis-associated protein	NA	ENSONIG00000000123	-	AERX01075601.2:193-1542	0	0.932049	0	1.39621	0.212937	0	0.268106	0.146637
ENSONIT00000000152	ENSONIG00000000124	coenzyme Q3 homolog, methyltransferase (S. cerevisiae) [Source:HGNC Symbol;Acc:18175]		13.787	9.26066	11.1341	16.2019	3.4516	12.7376	13.0829	31.0282	18.7633	34.583	27.6239	41.9661	18.0432	GO:0008610; lipid biosynthetic process; Biological Process GO:0006744; ubiquinone biosynthetic process; Biological Process GO:0008152; metabolic process; Biological Process GO:0008425; 2-polyprenyl-6-methoxy-1,4-benzoquinone methyltransferase activity; Molecular Function GO:0008168; methyltransferase activity; Molecular Function	IPR013216; Methyltransferase type 11 IPR013217; Methyltransferase type 12 IPR003333; Mycolic acid cyclopropane synthase IPR010233; Ubiquinone biosynthesis O-methyltransferase	K00591; Metabolism; Metabolism of Cofactors and Vitamins; Ubiquinone and other terpenoid-quinone biosynthesis [PATH:ko00130]	ENSONIG00000000124	coq3	GL831268.1:976834-981939	10.2868	7.37645	7.11111	5.85551	10.074	9.7098	37.0253	8.26445
ENSONIT00000000153	ENSONIG00000000125			0.115652	0.125863	0.0508172														ENSONIG00000000125	faxcb	GL831268.1:983938-999191	4.23375	2.07516	1.39425	1.04498	1.43565	0.340396	5.84345	23.4947
ENSONIT00000000155	ENSONIG00000000126			0.29293	0.001	0.0117011														ENSONIG00000000126	-	GL831893.1:29899-31971	0.0981268	0	0.649994	0.650953	0.666874	14.5248	0	0.0364329
ENSONIT00000000157	ENSONIG00000000127	F-box and leucine-rich repeat protein 4 [Source:HGNC Symbol;Acc:13601]		3.18819	3.00253	2.37761	0.840445	3.73233	2.06028	2.6965	2.84108	8.55956	1.28027	4.76475	4.24261	8.20913	GO:0005515; protein binding; Molecular Function	IPR001810; F-box domain, cyclin-like IPR006553; Leucine-rich repeat, cysteine-containing subtype	NA	ENSONIG00000000127	fbxl4	GL831268.1:1028854-1046043	3.20065	3.31672	2.50182	1.99533	2.80387	2.87483	4.67135	7.20819
ENSONIT00000000158	ENSONIG00000000128	MMS22-like, DNA repair protein [Source:HGNC Symbol;Acc:21475]		2.1046	1.31035	0.954303	0.400798	2.35621	4.28623	2.22952	19.2098	8.97652	16.898	11.8806	15.827	8.72892	NA	NA	NA	ENSONIG00000000128	mms22l	GL831268.1:1268760-1317735	1.13571	1.19078	1.26702	1.03419	4.10492	3.23913	7.69971	2.69698
ENSONIT00000000159	ENSONIG00000000129			7.65545	6.4111	3.40256	0.256431	0.647036	5.14539	9.08577	2.62682	10.7169	3.37566	4.77967	4.4641	7.17232	GO:0006470; protein dephosphorylation; Biological Process GO:0016311; dephosphorylation; Biological Process GO:0004725; protein tyrosine phosphatase activity; Molecular Function GO:0016791; phosphatase activity; Molecular Function	IPR000242; Protein-tyrosine phosphatase, receptor/non-receptor type IPR003595; Protein-tyrosine phosphatase, catalytic IPR000387; Protein-tyrosine/Dual-specificity phosphatase	NA	ENSONIG00000000129	-	GL831812.1:3035-99163	5.04568	5.60538	4.17455	3.08316	2.72836	4.07749	2.46273	2.41694
ENSONIT00000000160	ENSONIG00000000130	kelch-like 32 (Drosophila) [Source:HGNC Symbol;Acc:21221]		0.159348	0.0854694	0.0525127	0	1.30484	0.565777	0.750297	0.10387	1.95585	0.117561	0.228319	0.194036	2.01161	GO:0005515; protein binding; Molecular Function	IPR006652; Kelch repeat type 1 IPR013069; BTB/POZ IPR011705; BTB/Kelch-associated IPR000210; BTB/POZ-like IPR017096; Kelch-like protein, gigaxonin	NA	ENSONIG00000000130	klhl32	GL831268.1:1268760-1317735	1.3277	1.02667	0.614354	0.532658	1.29648	1.01958	4.26487	1.27222
ENSONIT00000000162	ENSONIG00000000131						0.164205	0.3798	1.32413	2.2099	0	0.774238	0.181786	0.451908	0.320044	1.22076	GO:0005515; protein binding; Molecular Function	IPR007110; Immunoglobulin-like	NA	ENSONIG00000000131	-	GL831395.1:7370-11141	0	0	0	0	0	0.430128	0	0.129622
ENSONIT00000000164	ENSONIG00000000132						0.0548078	0.126768	0.732395	1.91779	0.857754	20.5446	0.728109	7.61723	0.160235	54.0041	NA	NA	NA	ENSONIG00000000132	-	AERX01073306.1:5-1375	0	0	0	0	0	0	0	0
ENSONIT00000000165	ENSONIG00000000133			8.22654	9.03829	3.44687	0.132953	0	3.76772	15.4596	1.04037	5.64195	1.20694	2.83572	3.33633	7.7933	GO:0005515; protein binding; Molecular Function	IPR007110; Immunoglobulin-like	NA	ENSONIG00000000133	-	GL831395.1:16878-20276	4.4158	8.3569	2.7606	3.19755	8.11235	9.34037	0.789392	2.6996
ENSONIT00000000166	ENSONIG00000000134	general transcription factor IIIC, polypeptide 1, alpha 220kDa [Source:HGNC Symbol;Acc:4664]		4.17829	2.6345	1.67342	0.536708	0.727709	4.8652	5.16576	21.2307	18.7614	16.4237	17.0373	18.1304	18.675	NA	IPR007309; B-block binding subunit of TFIIIC	NA	ENSONIG00000000134	GTF3C1	GL831395.1:22726-46499	4.49903	4.93771	4.55242	4.1091	6.80689	5.3101	9.84547	8.24268
ENSONIT00000000168	ENSONIG00000000135	frizzled family receptor 6 [Source:HGNC Symbol;Acc:4044]		24.3651	26.5856	13.1941	1.43699	2.79493	20.3462	34.0194	7.51344	27.333	6.33443	9.4599	12.2056	33.0951	GO:0007166; cell surface receptor signaling pathway; Biological Process GO:0001525; angiogenesis; Biological Process GO:0016020; membrane; Cellular Component GO:0004888; transmembrane signaling receptor activity; Molecular Function GO:0005515; protein binding; Molecular Function	IPR000539; Frizzled protein IPR020067; Frizzled domain IPR017981; GPCR, family 2-like	K02376; Environmental Information Processing; Signal Transduction; Wnt signaling pathway [PATH:ko04310] Organismal Systems; Endocrine System; Melanogenesis [PATH:ko04916] Human Diseases; Cancers; Pathways in cancer [PATH:ko05200] Human Diseases; Cancers; Basal cell carcinoma [PATH:ko05217] Human Diseases; Infectious Diseases; HTLV-I infection [PATH:ko05166]	ENSONIG00000000135	FZD6	GL831268.1:1319884-1328498	38.2112	39.0113	24.8884	18.6238	24.9415	23.2348	5.13401	7.03321
ENSONIT00000000169	ENSONIG00000000136	mitochondrial ribosomal protein L4 [Source:HGNC Symbol;Acc:14276]		9.12948	8.46122	9.58159	1.02018	0	33.4393	29.3268	38.2123	33.9924	55.838	31.8668	39.4365	26.0203	GO:0006412; translation; Biological Process GO:0005840; ribosome; Cellular Component GO:0003735; structural constituent of ribosome; Molecular Function	IPR002136; Ribosomal protein L4/L1e IPR013005; Ribosomal protein L4/L1e, bacterial-type	NA	ENSONIG00000000136	mrpl4	GL831280.1:446158-457569	13.0191	7.59829	6.72159	7.86679	9.66718	8.39398	16.7274	4.45442
ENSONIT00000000170	ENSONIG00000000137	collagen triple helix repeat containing 1 [Source:HGNC Symbol;Acc:18831]		11.9532	9.96084	9.35594	0.356844	4.33318	3.94634	3.84197	3.76966	7.36112	5.45168	2.88483	1.6953	4.33647	NA	IPR008160; Collagen triple helix repeat	NA	ENSONIG00000000137	cthrc1b	GL831268.1:1331276-1336874	5.53143	11.9245	4.73083	2.85591	4.81365	6.976	1.29219	1.10905
ENSONIT00000000171	ENSONIG00000000138			2.62926	1.80813	1.66547														ENSONIG00000000138	si:dkey-23f9.4	GL831280.1:446158-457569	5.67101	5.36493	5.27297	3.80392	6.48943	4.04255	56.5589	32.4358
ENSONIT00000000173	ENSONIG00000000139	solute carrier family 25 (mitochondrial folate carrier) , member 32 [Source:HGNC Symbol;Acc:29683]		9.73554	10.2506	9.53891	0.0626374	0	19.6267	9.07051	113.224	25.2516	114.278	80.2018	100.689	24.8237	NA	IPR018108; Mitochondrial substrate/solute carrier IPR002030; Mitochondrial brown fat uncoupling protein	NA	ENSONIG00000000139	slc25a32b	GL831268.1:1337682-1342009	8.43981	6.31647	6.87335	7.03041	11.0222	5.80292	90.5106	13.1551
ENSONIT00000000174	ENSONIG00000000140	sema domain, transmembrane domain (TM), and cytoplasmic domain, (semaphorin) 6D [Source:HGNC Symbol;Acc:16770]		19.9658	12.3621	8.94878	1.33792	32.493	5.71123	12.5642	1.97755	8.27977	1.69511	4.74325	17.5113	5.26021	GO:0016020; membrane; Cellular Component GO:0005515; protein binding; Molecular Function	IPR001627; Semaphorin/CD100 antigen IPR002165; Plexin	K06842; Organismal Systems; Development; Axon guidance [PATH:ko04360]	ENSONIG00000000140	sema6dl	GL831420.1:27930-48568	11.9817	16.8048	14.7522	7.70375	8.06171	10.7141	16.6257	10.3018
ENSONIT00000000175	ENSONIG00000000141	collagen, type IX, alpha 1 [Source:HGNC Symbol;Acc:2217]		1.61503	0.474883	0.82791	0	0	0.0552086	0.0806226	0.375018	0.706154	0.225488	0.26791	0.0291901	0.462493	NA	IPR008160; Collagen triple helix repeat	K08131; Organismal Systems; Digestive System; Protein digestion and absorption [PATH:ko04974]	ENSONIG00000000141	col9a1a	GL831280.1:459035-480806	2.03987	1.90246	0.473238	0.414445	0.146405	0.475735	1.45316	1.27165
ENSONIT00000000176	ENSONIG00000000142	DDB1 and CUL4 associated factor 13 [Source:HGNC Symbol;Acc:24535]		33.8443	32.818	30.2209	1.70961	0.427488	25.6772	19.5756	93.7899	56.2086	123.687	91.3662	90.8453	55.5956	GO:0005515; protein binding; Molecular Function	IPR007287; Sof1-like protein IPR001680; WD40 repeat IPR017986; WD40-repeat-containing domain	NA	ENSONIG00000000142	dcaf13	GL831268.1:1342955-1356285	21.5303	19.6183	17.7826	19.6686	26.3086	21.0006	99.1773	24.2283
ENSONIT00000000177	ENSONIG00000000143			1.13186	1.0139	0.700961														ENSONIG00000000143	RIMS2 (1 of many)	GL831268.1:1357827-1498039	0.591453	1.03104	0.708887	1.03778	1.11405	2.06986	0.286817	0.750319
ENSONIT00000000179	ENSONIG00000000144	axin 1 [Source:HGNC Symbol;Acc:903]		21.8994	14.391	11.1014	16.9244	935.775	11.1824	18.0837	6.60354	14.5091	3.73697	6.73645	12.1542	13.9314	GO:0038032; termination of G-protein coupled receptor signaling pathway; Biological Process GO:0007275; multicellular organismal development; Biological Process GO:0005622; intracellular; Cellular Component GO:0004871; signal transducer activity; Molecular Function	IPR001158; DIX IPR000342; Regulator of G protein signalling IPR014936; Axin beta-catenin binding	K02157; Environmental Information Processing; Signal Transduction; Wnt signaling pathway [PATH:ko04310] Human Diseases; Cancers; Pathways in cancer [PATH:ko05200] Human Diseases; Cancers; Colorectal cancer [PATH:ko05210] Human Diseases; Cancers; Basal cell carcinoma [PATH:ko05217] Human Diseases; Cancers; Endometrial cancer [PATH:ko05213]	ENSONIG00000000144	AXIN1 (1 of many)	GL831395.1:48877-67257	14.7076	24.5933	14.9222	14.2434	14.1298	15.5724	6.97201	9.18544
ENSONIT00000000181	ENSONIG00000000145	Dmx-like 2 [Source:HGNC Symbol;Acc:2938]		0.511232	0.404562	0.19376	0.400084	0.611692	2.3935	2.44579	11.7269	31.3978	5.23996	15.359	16.3623	32.4427	GO:0005515; protein binding; Molecular Function	IPR022033; RAVE complex protein Rav1 C-terminal IPR001680; WD40 repeat IPR017986; WD40-repeat-containing domain	NA	ENSONIG00000000145	dmxl2	GL831420.1:298756-343668	1.84302	2.18341	3.20846	1.43885	1.81772	2.20608	3.38728	11.1945
ENSONIT00000000183	ENSONIG00000000146	THUMP domain containing 1 [Source:HGNC Symbol;Acc:23807]		17.5942	11.4234	11.4203	0.216923	0	17.5924	15.8425	156.958	187.004	183.185	142.881	103.726	206.506	NA	IPR004114; THUMP	NA	ENSONIG00000000146	thumpd1	GL831395.1:85686-87351	9.47076	10.2814	9.25698	7.48194	15.4026	10.3636	77.7597	57.9351
ENSONIT00000000184	ENSONIG00000000147	ERI1 exoribonuclease family member 2 [Source:HGNC Symbol;Acc:30541]		0.916623	0.35705	0.557669	0.281911	0	1.55883	1.22926	14.3831	10.3015	13.9693	15.9825	14.2173	9.64081	GO:0005622; intracellular; Cellular Component GO:0004527; exonuclease activity; Molecular Function GO:0008270; zinc ion binding; Molecular Function	IPR013520; Exonuclease, RNase T/DNA polymerase III IPR010666; Zinc finger, GRF-type IPR006055; Exonuclease	NA	ENSONIG00000000147	ERI2	GL831395.1:90234-94319	0.40523	0.504975	0.34592	0.521638	1.5081	0.985908	18.9853	7.7707
ENSONIT00000000186	ENSONIG00000000148			3.0459	2.19437	1.54748	2.62469	4.02718	2.23925	2.11241	2.03352	8.76094	2.05988	2.93227	1.78542	8.12912	GO:0005622; intracellular; Cellular Component GO:0003676; nucleic acid binding; Molecular Function GO:0004527; exonuclease activity; Molecular Function	IPR013520; Exonuclease, RNase T/DNA polymerase III IPR000504; RNA recognition motif domain IPR006055; Exonuclease	K14570; Genetic Information Processing; Translation; Ribosome biogenesis in eukaryotes [PATH:ko03008]	ENSONIG00000000148	-	GL831395.1:94749-106347	2.9264	3.17394	2.5354	2.86412	3.69393	2.13824	4.25398	7.89593
ENSONIT00000000188	ENSONIG00000000149			0.121205																ENSONIG00000000149	-	GL831268.1:1507181-1529880	0.177299	0	0.276288	0.0586429	0.0485684	0	0.082175	0.607718
ENSONIT00000000190	ENSONIG00000000150			0.539494	0.171436	0.281336														ENSONIG00000000150	dpys	GL831268.1:1533752-1548638	1.82893	2.85944	4.18671	1.93552	0.152748	1.94387	0	0.218489
ENSONIT00000000192	ENSONIG00000000151	poly(A)-specific ribonuclease [Source:HGNC Symbol;Acc:8609]		8.91957	6.73653	6.25441	0.0606109	1.5421	11.1577	10.8979	502.271	29.5787	349.686	342.351	287.198	24.4712	GO:0006402; mRNA catabolic process; Biological Process GO:0005634; nucleus; Cellular Component GO:0005737; cytoplasm; Cellular Component GO:0003676; nucleic acid binding; Molecular Function GO:0003723; RNA binding; Molecular Function GO:0004535; poly(A)-specific ribonuclease activity; Molecular Function GO:0046872; metal ion binding; Molecular Function	IPR006941; Ribonuclease CAF1 IPR014789; Poly(A)-specific ribonuclease, RNA-binding IPR001374; Single-stranded nucleic acid binding R3H	K01148; Genetic Information Processing; Folding, Sorting and Degradation; Proteasome [BR:ko03051] Genetic Information Processing; Folding, Sorting and Degradation; RNA degradation [PATH:ko03018]	ENSONIG00000000151	parn	GL831395.1:108188-120927	9.55186	13.353	10.8481	10.828	15.2005	15.3078	296.041	23.3061
ENSONIT00000000194	ENSONIG00000000152	zinc finger protein, multitype 2 [Source:HGNC Symbol;Acc:16700]		3.70407	3.31749	1.98579	0.1617	2.3687	2.38432	5.44528	0.478009	2.96499	0.151166	0.605712	0.525269	2.04465	GO:0005622; intracellular; Cellular Component GO:0008270; zinc ion binding; Molecular Function GO:0005515; protein binding; Molecular Function	IPR015880; Zinc finger, C2H2-like IPR007087; Zinc finger, C2H2	NA	ENSONIG00000000152	zfpm2a	GL831268.1:1642028-1731860	2.1919	2.55793	2.01331	2.08437	1.84589	2.49722	0.0326186	0.684457
ENSONIT00000000195	ENSONIG00000000153			0.0272207																ENSONIG00000000153	gldn	GL831420.1:298756-343668	0.895172	0.842838	1.01944	0.21927	0.794271	0.210291	0.132294	0.0444708
ENSONIT00000000197	ENSONIG00000000154	oxidation resistance 1 [Source:HGNC Symbol;Acc:15822]		20.8516	16.7533	11.2608	0.956695	35.4646	12.0456	27.0034	15.8223	30.357	13.7629	16.5625	22.716	29.529	GO:0016998; cell wall macromolecule catabolic process; Biological Process	IPR006571; TLDc IPR018392; Peptidoglycan-binding lysin domain IPR004182; GRAM IPR002482; Peptidoglycan-binding Lysin subgroup	NA	ENSONIG00000000154	oxr1b	GL831268.1:1883541-1930334	10.2912	8.94818	5.35836	7.14072	5.58585	7.9061	5.90638	6.40112
ENSONIT00000000198	ENSONIG00000000155	cytochrome P450, family 19, subfamily A, polypeptide 1 [Source:HGNC Symbol;Acc:2594]	WDS-Tilapia-SE-cyp19a1a-mRNA	0.517624	0.30178	0.43214	8.97563	0	674.356	25.7191	145.006	3.41602	563.454	122.235	133.578	2.624	GO:0055114; oxidation-reduction process; Biological Process GO:0005506; iron ion binding; Molecular Function GO:0009055; electron carrier activity; Molecular Function GO:0016705; oxidoreductase activity, acting on paired donors, with incorporation or reduction of molecular oxygen; Molecular Function GO:0020037; heme binding; Molecular Function GO:0004497; monooxygenase activity; Molecular Functio…	IPR001128; Cytochrome P450 IPR002401; Cytochrome P450, E-class, group I IPR002403; Cytochrome P450, E-class, group IV	K07434; Metabolism; Lipid Metabolism; Steroid hormone biosynthesis [PATH:ko00140]	ENSONIG00000000155	cyp19a1a	GL831420.1:347058-350035	94.144	0.378017	239.333	0.346303	425.115	0.569178	74.0871	0.578421
ENSONIT00000000199	ENSONIG00000000156	protein tyrosine phosphatase type IVA, member 1 [Source:HGNC Symbol;Acc:9634]		95.932	70.6786	70.1758	10.8256	12.3688	45.3158	76.1812	63.2784	61.498	92.9313	81.9309	105.562	64.6683	GO:0006470; protein dephosphorylation; Biological Process GO:0016311; dephosphorylation; Biological Process GO:0004725; protein tyrosine phosphatase activity; Molecular Function GO:0008138; protein tyrosine/serine/threonine phosphatase activity; Molecular Function GO:0016791; phosphatase activity; Molecular Function	IPR000242; Protein-tyrosine phosphatase, receptor/non-receptor type IPR000340; Dual specificity phosphatase, catalytic domain IPR003595; Protein-tyrosine phosphatase, catalytic IPR000387; Protein-tyrosine/Dual-specificity phosphatase	NA	ENSONIG00000000156	ptp4a1	GL831280.1:485663-489158	50.0721	57.6128	61.6811	49.2192	53.0264	54.5353	42.8811	34.6291
ENSONIT00000000200	ENSONIG00000000157	lengsin, lens protein with glutamine synthetase domain [Source:HGNC Symbol;Acc:21016]		0.0640278	0.238905	0.0844008	0.0895988	2.48687	0	0.112545	0.140224	1.40822	0.0529022	0.390426	0.189186	1.02478	GO:0006807; nitrogen compound metabolic process; Biological Process GO:0006542; glutamine biosynthetic process; Biological Process GO:0002089; lens morphogenesis in camera-type eye; Biological Process GO:0030154; cell differentiation; Biological Process GO:0005884; actin filament; Cellular Component GO:0004356; glutamate-ammonia ligase activity; Molecular Function	IPR008146; Glutamine synthetase, catalytic domain IPR008147; Glutamine synthetase, beta-Grasp	NA	ENSONIG00000000157	lgsn	GL831280.1:497799-500830	0.0500829	0.0813854	0.0910356	0.0489189	0.0222544	0.0238526	0.279611	0.437026
ENSONIT00000000201	ENSONIG00000000158	family with sequence similarity 83, member B [Source:HGNC Symbol;Acc:21357]		0.120052	0.298631	0.140668	0	0	2.01271	1.50729	0	0	0	0	0	0	NA	IPR012461; Protein of unknown function DUF1669	NA	ENSONIG00000000158	-	GL831280.1:512259-515165	0.790731	0.375823	3.59229	0.656342	0	0.504856	0	0.0592934
ENSONIT00000000202	ENSONIG00000000159			16.3512	27.4295	31.6327	0.327343	0.206491	2.50938	1.3777	1.42047	2.98165	1.87125	1.58678	1.16002	2.10173	GO:0005515; protein binding; Molecular Function	IPR013098; Immunoglobulin I-set IPR003961; Fibronectin, type III IPR013151; Immunoglobulin IPR013106; Immunoglobulin V-set IPR003599; Immunoglobulin subtype IPR003598; Immunoglobulin subtype 2 IPR007110; Immunoglobulin-like	NA	ENSONIG00000000159	myom2a	GL831280.1:515766-542576	86.8416	39.642	5.7169	7.56419	0.803762	1.89846	4.2502	1.64364
ENSONIT00000000204	ENSONIG00000000160	extracellular leucine-rich repeat and fibronectin type III domain containing 1 [Source:HGNC Symbol;Acc:33154]		0.00710048	0.0927283	0.0499188	0.206077	0.370727	0.168816	0.33281	0.107505	0.647779	0.0202792	0.031508	0.401655	0.301172	GO:0005515; protein binding; Molecular Function	IPR003591; Leucine-rich repeat, typical subtype IPR000483; Cysteine-rich flanking region, C-terminal	NA	ENSONIG00000000160	elfn1b	GL831395.1:295063-303036	0.0654938	0.22467	0.134938	0.0829555	0.361542	0.24278	0.0173496	0.120891
ENSONIT00000000206	ENSONIG00000000161	squalene epoxidase [Source:HGNC Symbol;Acc:11279]		1.59622	1.46496	1.43668	0.216165	0.583312	5.51159	2.21098	4.62348	12.1459	3.17483	2.20611	6.10909	3.17288	GO:0055114; oxidation-reduction process; Biological Process GO:0006631; fatty acid metabolic process; Biological Process GO:0016021; integral to membrane; Cellular Component GO:0016491; oxidoreductase activity; Molecular Function GO:0050660; flavin adenine dinucleotide binding; Molecular Function GO:0003857; 3-hydroxyacyl-CoA dehydrogenase activity; Molecular Function GO:0004506; squalene monooxy…	IPR013698; Squalene epoxidase IPR002938; Monooxygenase, FAD-binding IPR006076; FAD dependent oxidoreductase IPR001327; Pyridine nucleotide-disulphide oxidoreductase, NAD-binding domain IPR006176; 3-hydroxyacyl-CoA dehydrogenase, NAD binding IPR003042; Aromatic-ring hydroxylase-like	K00511; Metabolism; Metabolism of Terpenoids and Polyketides; Sesquiterpenoid and triterpenoid biosynthesis [PATH:ko00909]	ENSONIG00000000161	sqlea	GL831268.1:1933831-1939803	1.1538	0.465287	3.60276	1.28528	1.86478	2.78304	2.01047	1.20453
ENSONIT00000000207	ENSONIG00000000162	MAD1 mitotic arrest deficient-like 1 (yeast) [Source:HGNC Symbol;Acc:6762]		19.1403	11.4602	10.2513	1.79321	3.02844	11.5551	10.8332	79.3816	40.5309	78.2359	62.9225	66.0873	32.5715	NA	IPR008672; Mitotic checkpoint	K06638; Cellular Processes; Cell Growth and Death; Cell cycle [PATH:ko04110] Organismal Systems; Endocrine System; Progesterone-mediated oocyte maturation [PATH:ko04914] Human Diseases; Cancers; Viral carcinogenesis [PATH:ko05203]	ENSONIG00000000162	mad1l1	GL831395.1:329383-396127	5.9297	5.5081	5.47677	5.17108	10.7901	8.10451	56.0645	15.3106
ENSONIT00000000208	ENSONIG00000000163	ring finger protein 144B [Source:HGNC Symbol;Acc:21578]		6.94999	6.33142	6.01831	1.01018	1.09037	9.7131	15.7342	0.526986	8.89108	0.685914	2.08509	1.24697	9.1276	GO:0008270; zinc ion binding; Molecular Function	IPR002867; Zinc finger, C6HC-type	NA	ENSONIG00000000163	rnf144b	GL831268.1:1955177-1965660	5.55876	4.14276	6.44441	4.2016	5.89157	6.01436	0.265377	4.29767
ENSONIT00000000209	ENSONIG00000000164	IQ motif containing G [Source:HGNC Symbol;Acc:25251]		6.88997	5.28232	5.24425	2.35709	0	4.28245	5.98188	1.15937	235.614	2.05774	69.4567	0.689115	198.034	GO:0005515; protein binding; Molecular Function	IPR000048; IQ motif, EF-hand binding site	NA	ENSONIG00000000164	-	GL831268.1:1969591-1974483	4.75182	5.68471	2.56563	2.69517	4.05098	2.81577	0.18649	43.9752
ENSONIT00000000210	ENSONIG00000000165	spire homolog 1 (Drosophila) [Source:HGNC Symbol;Acc:30622]		5.13073	5.47144	5.8077	0.113074	5.36149	0.325647	0.441312	0.132722	0.533151	0.0375541	0.0777976	0	0.387983	NA	IPR011019; KIND	K02098; Organismal Systems; Development; Dorso-ventral axis formation [PATH:ko04320]	ENSONIG00000000165	SPIRE1 (1 of many)	GL831268.1:1975083-2011860	1.73166	2.82911	0.816992	0.758028	0.394123	0.473856	0.16815	0.475713
ENSONIT00000000211	ENSONIG00000000166	tumor necrosis factor, alpha-induced protein 8-like 3 [Source:HGNC Symbol;Acc:20620]		5.26162	4.66976	5.89765	15.0243	13.6186	23.1082	21.5316	2.85974	2.39327	2.47246	2.37474	2.52271	6.56012	NA	IPR008477; Protein of unknown function DUF758	NA	ENSONIG00000000166	tnfaip8l3	GL831420.1:361648-385292	5.3043	5.34393	5.67531	7.51964	13.2818	11.6728	0.207656	0.343069
ENSONIT00000000212	ENSONIG00000000167	secretogranin III [Source:HGNC Symbol;Acc:13707]		5.10362	1.94957	2.60021	11.8554	12.9744	7.36939	12.1431	10.0241	1.78202	0.880853	2.98353	32.179	1.34231	NA	NA	NA	ENSONIG00000000167	scg3	GL831420.1:392046-406346	2.49163	1.87705	2.44794	4.00652	22.7238	5.0947	4.81176	2.49236
ENSONIT00000000214	ENSONIG00000000168			2.79886	2.32977	1.41446	8.06629	24.0242	0.610995	1.66554	0.0864653	1.3025	0.0733965	0.64621	0.269206	1.20062	GO:0007186; G-protein coupled receptor signaling pathway; Biological Process GO:0016021; integral to membrane; Cellular Component	IPR000276; GPCR, rhodopsin-like, 7TM IPR019430; 7TM GPCR, serpentine receptor class x (Srx) IPR017452; GPCR, rhodopsin-like superfamily	NA	ENSONIG00000000168	-	GL831395.1:456367-460468	0.530402	3.58105	1.34496	1.36311	1.87358	1.99785	0.16391	0.659194
ENSONIT00000000215	ENSONIG00000000169			10.3722	8.76552	5.13678	1.09677	8.27795	2.58011	4.47476	13.2801	6.39614	7.59191	16.9587	38.2248	6.43718	GO:0007389; pattern specification process; Biological Process GO:0016020; membrane; Cellular Component GO:0030173; integral to Golgi membrane; Cellular Component GO:0016757; transferase activity, transferring glycosyl groups; Molecular Function GO:0033829; O-fucosylpeptide 3-beta-N-acetylglucosaminyltransferase activity; Molecular Function	IPR003378; Fringe-like IPR017374; Fringe	K05948; Metabolism; Glycan Biosynthesis and Metabolism; Other types of O-glycan biosynthesis [PATH:ko00514] Environmental Information Processing; Signal Transduction; Notch signaling pathway [PATH:ko04330]	ENSONIG00000000169	-	GL831395.1:505598-516034	4.0896	6.21113	2.92061	3.51883	8.0548	5.51878	23.2062	6.08406
ENSONIT00000000216	ENSONIG00000000170			0.123062	0.0229588	0.001														ENSONIG00000000170	fpr1 (1 of many)	GL831268.1:2025245-2036781	0.134868	0.132097	0.0454444	0.202048	0.116001	0.279679	0.0449475	0.0476984
ENSONIT00000000218	ENSONIG00000000171			5.79374	5.71041	3.49268														ENSONIG00000000171	ttyh3b	GL831395.1:520802-547863	4.66875	10.1836	4.66724	6.21542	9.09058	11.0253	0.0643083	8.13962
ENSONIT00000000220	ENSONIG00000000172	LysM, putative peptidoglycan-binding, domain containing 2 [Source:HGNC Symbol;Acc:28571]		2.55133	2.1189	1.8226	10.7809	7.94416	7.03398	11.2991	41.2103	50.8327	24.6308	43.1923	43.0943	57.0699	GO:0016998; cell wall macromolecule catabolic process; Biological Process	IPR018392; Peptidoglycan-binding lysin domain IPR002482; Peptidoglycan-binding Lysin subgroup	NA	ENSONIG00000000172	lysmd2	GL831420.1:407507-413785	7.02382	4.27877	4.96559	5.56809	5.35165	6.60013	8.9869	12.17
ENSONIT00000000222	ENSONIG00000000173			0.827326	0.447611	0.465311	0	2.78492	0.106695	0.349014	0	0.109176	0.020507	0.0318621	0.0225649	0.105933	GO:0003723; RNA binding; Molecular Function GO:0003724; RNA helicase activity; Molecular Function GO:0005524; ATP binding; Molecular Function	IPR001850; Peptidase S7, flavivirus helicase (NS3)	NA	ENSONIG00000000173	-	GL832573.1:2346-4666	0.051922	0	0.109645	0.0541504	0.0427454	0.0456855	0	0.0429692
ENSONIT00000000223	ENSONIG00000000174	tropomodulin 2 (neuronal) [Source:HGNC Symbol;Acc:11872]		55.1852	45.9233	42.0711	2.13798	19.0935	34.5628	37.4052	48.3309	34.7224	17.4886	41.3509	51.3644	24.8606	GO:0005856; cytoskeleton; Cellular Component GO:0005523; tropomyosin binding; Molecular Function	IPR004934; Tropomodulin IPR003590; Leucine-rich repeat, ribonuclease inhibitor subtype	NA	ENSONIG00000000174	tmod2	GL831420.1:425524-440432	34.1687	56.8723	40.4227	40.0626	57.8552	60.7744	35.3907	20.296
ENSONIT00000000224	ENSONIG00000000175	IQ motif containing E [Source:HGNC Symbol;Acc:29171]		5.43277	4.09844	3.80767	1.24108	2.203	4.10956	8.1105	15.8548	33.954	11.2728	11.7162	6.23016	33.952	GO:0005515; protein binding; Molecular Function	IPR000048; IQ motif, EF-hand binding site	NA	ENSONIG00000000175	iqce	GL831395.1:548657-558372	5.81313	5.53503	3.49068	3.34714	4.81325	3.91739	3.7816	15.777
ENSONIT00000000226	ENSONIG00000000176			12.4171	9.13868	8.78707														ENSONIG00000000176	leo1	GL831420.1:443293-453552	15.0513	15.1766	18.7539	17.0241	23.0302	18.8491	30.3439	22.8716
ENSONIT00000000229	ENSONIG00000000177	fascin homolog 1, actin-bundling protein (Strongylocentrotus purpuratus) [Source:HGNC Symbol;Acc:11148]		14.8253	7.66976	14.5554	3.51125	3.09387	5.12354	6.88573	1.3738	2.7593	0.46276	0.661477	0.264783	3.29884	GO:0030674; protein binding, bridging; Molecular Function GO:0051015; actin filament binding; Molecular Function	IPR022768; Fascin domain	NA	ENSONIG00000000177	fscn1b	GL831395.1:562565-569221	5.04107	11.1568	4.68301	3.65736	6.50205	5.38436	0.0187757	0.710217
ENSONIT00000000230	ENSONIG00000000178			3.9884	1.49454	2.57631	6.10599	2.86872	1.97831	2.36254	3.88213	1.12462	3.33762	0.853343	4.41635	0.10912	GO:0007264; small GTPase mediated signal transduction; Biological Process GO:0015031; protein transport; Biological Process GO:0006184; GTP catabolic process; Biological Process GO:0007165; signal transduction; Biological Process GO:0005622; intracellular; Cellular Component GO:0016020; membrane; Cellular Component GO:0005525; GTP binding; Molecular Function GO:0003924; GTPase activity; Molecular…	IPR001806; Small GTPase superfamily IPR013684; Mitochondrial Rho-like IPR020849; Small GTPase superfamily, Ras type IPR003579; Small GTPase superfamily, Rab type IPR003578; Small GTPase superfamily, Rho type IPR005225; Small GTP-binding protein domain	NA	ENSONIG00000000178	zgc:152698	GL831395.1:574282-575465	0.376747	1.57629	1.15116	1.05908	1.60033	0.480979	4.16344	0.323863
ENSONIT00000000231	ENSONIG00000000179	polo-like kinase 1 [Source:HGNC Symbol;Acc:9077]		28.7966	16.1435	17.3047	5.16077	1.22637	32.7388	15.4322	185.875	125.25	150.393	165.06	193.697	141.076	GO:0006468; protein phosphorylation; Biological Process GO:0004672; protein kinase activity; Molecular Function GO:0005524; ATP binding; Molecular Function GO:0005515; protein binding; Molecular Function GO:0004713; protein tyrosine kinase activity; Molecular Function	IPR000719; Protein kinase, catalytic domain IPR000959; POLO box duplicated domain IPR001245; Serine-threonine/tyrosine-protein kinase catalytic domain IPR002290; Serine/threonine- / dual-specificity protein kinase, catalytic domain IPR020635; Tyrosine-protein kinase, catalytic domain	K06631; Cellular Processes; Cell Growth and Death; Cell cycle [PATH:ko04110] Cellular Processes; Cell Growth and Death; Oocyte meiosis [PATH:ko04114] Organismal Systems; Endocrine System; Progesterone-mediated oocyte maturation [PATH:ko04914]	ENSONIG00000000179	plk1	GL831395.1:578467-584167	10.0149	11.7773	9.48585	5.30775	28.7258	19.549	123.301	51.7597
ENSONIT00000000232	ENSONIG00000000180	mitogen-activated protein kinase 6 [Source:HGNC Symbol;Acc:6879]		43.876	36.3306	29.4523	52.3474	30.2694	84.8999	99.5507	109.545	100.111	79.5698	87.7617	100.652	130.241	GO:0006468; protein phosphorylation; Biological Process GO:0004672; protein kinase activity; Molecular Function GO:0005524; ATP binding; Molecular Function GO:0004713; protein tyrosine kinase activity; Molecular Function	IPR000719; Protein kinase, catalytic domain IPR001245; Serine-threonine/tyrosine-protein kinase catalytic domain IPR002290; Serine/threonine- / dual-specificity protein kinase, catalytic domain IPR020635; Tyrosine-protein kinase, catalytic domain IPR008350; ERK3/4 MAP kinase	NA	ENSONIG00000000180	mapk6	GL831420.1:478368-489289	74.0373	124.667	65.4295	59.9528	59.6716	64.9931	31.3259	33.4445
ENSONIT00000000234	ENSONIG00000000181	partner and localizer of BRCA2 [Source:HGNC Symbol;Acc:26144]		1.68123	0.653805	0.579708	0.183998	0	1.27177	0.627321	20.2532	16.3391	24.5251	13.9676	11.5356	14.4507	NA	NA	K10897; Genetic Information Processing; Replication and Repair; Fanconi anemia pathway [PATH:ko03460]	ENSONIG00000000181	-	GL831395.1:587107-595693	0.579101	0.661087	0.791478	0.536179	1.77025	1.50847	17.9891	5.43715
ENSONIT00000000235	ENSONIG00000000182	T-box 5 [Source:HGNC Symbol;Acc:11604]		0.444038	0.166635	0.318453	0.200075	5.83086	0.0737544	0.495446	0.125249	0.0943367	0.0354394	0.192719	0	0.205951	GO:0006355; regulation of transcription, DNA-dependent; Biological Process GO:0060174; limb bud formation; Biological Process GO:0003190; atrioventricular valve formation; Biological Process GO:0003294; atrial ventricular junction remodeling; Biological Process GO:0003342; proepicardium development; Biological Process GO:0009887; organ morphogenesis; Biological Process GO:0055007; cardiac muscle …	IPR001699; Transcription factor, T-box	NA	ENSONIG00000000182	tbx5a	GL831315.1:35001-53946	0.472303	0.79814	0.292323	0.0926914	0.0468702	1.43162	0.029444	0.0939013
ENSONIT00000000236	ENSONIG00000000183	ubiquitin specific peptidase 50 [Source:HGNC Symbol;Acc:20079]		0.320265	0.185708	0.152133	0.806389	6.32079	0.474794	0.192933	0	20.4895	0.11903	5.30157	0.174633	21.5973	GO:0006511; ubiquitin-dependent protein catabolic process; Biological Process GO:0004221; ubiquitin thiolesterase activity; Molecular Function	IPR001394; Peptidase C19, ubiquitin carboxyl-terminal hydrolase 2	NA	ENSONIG00000000183	-	GL831420.1:500390-518812	0.264151	0.0966715	0.221402	0.0596861	0.0920426	0.117517	0.0349667	3.96556
ENSONIT00000000237	ENSONIG00000000184	retinol dehydrogenase 8 (all-trans) [Source:HGNC Symbol;Acc:14423]		0.0461643	0.0430628	0.0405688	3.68226	196.338	0.0595353	0.0695528	0	0	0	0.0444471	0	0.184718	GO:0008152; metabolic process; Biological Process GO:0016491; oxidoreductase activity; Molecular Function	IPR002198; Short-chain dehydrogenase/reductase SDR IPR013968; Polyketide synthase, KR IPR002347; Glucose/ribitol dehydrogenase IPR003560; 2,3-dihydro-2,3-dihydroxybenzoate dehydrogenase	NA	ENSONIG00000000184	rdh8b	GL831395.1:598985-604303	0	0	0	0	0.0651128	0	0	0
ENSONIT00000000238	ENSONIG00000000185	ubiquitin specific peptidase 8 [Source:HGNC Symbol;Acc:12631]		5.17149	5.11747	3.84023	5.73813	1.54327	18.4208	24.9377	39.591	60.5832	29.3776	49.7235	50.8757	56.1123	GO:0006511; ubiquitin-dependent protein catabolic process; Biological Process GO:0004221; ubiquitin thiolesterase activity; Molecular Function	IPR001394; Peptidase C19, ubiquitin carboxyl-terminal hydrolase 2 IPR015063; Domain of unknown function DUF1873	K11839; Cellular Processes; Transport and Catabolism; Endocytosis [PATH:ko04144]	ENSONIG00000000185	usp8	GL831420.1:500390-518812	11.7253	10.3504	10.3142	10.1291	10.7166	13.1793	10.3629	14.8381
ENSONIT00000000240	ENSONIG00000000186	hexokinase 1 [Source:HGNC Symbol;Acc:4922]		11.1036	34.7622	20.3452	0.201597	1.65791	9.52684	14.0118	1.19191	7.34032	0.991917	3.43677	3.49266	8.04454	GO:0005975; carbohydrate metabolic process; Biological Process GO:0005524; ATP binding; Molecular Function GO:0016773; phosphotransferase activity, alcohol group as acceptor; Molecular Function	IPR022673; Hexokinase, C-terminal IPR022672; Hexokinase, N-terminal IPR001312; Hexokinase	K00844; Metabolism; Carbohydrate Metabolism; Glycolysis / Gluconeogenesis [PATH:ko00010] Metabolism; Carbohydrate Metabolism; Fructose and mannose metabolism [PATH:ko00051] Metabolism; Carbohydrate Metabolism; Galactose metabolism [PATH:ko00052] Metabolism; Carbohydrate Metabolism; Starch and sucrose metabolism [PATH:ko00500] Metabolism; Carbohydrate Metabolism; Amino sugar and nucleotide sugar m…	ENSONIG00000000186	hk1 (1 of many)	GL831280.1:548236-566757	7.66961	10.6734	6.27029	9.77575	8.87021	12.9131	0.322898	2.01436
ENSONIT00000000241	ENSONIG00000000187	T-box 3 [Source:HGNC Symbol;Acc:11602]		7.74684	6.38972	8.01807	2.10107	3.12884	5.63652	14.5178	0	1.96776	0.127453	0.712891	1.5006	3.09438	GO:0006355; regulation of transcription, DNA-dependent; Biological Process GO:0035050; embryonic heart tube development; Biological Process GO:0005634; nucleus; Cellular Component GO:0003700; sequence-specific DNA binding transcription factor activity; Molecular Function	IPR001699; Transcription factor, T-box IPR022582; Transcription factor, T-box, region of unknown function	NA	ENSONIG00000000187	tbx3a	GL831315.1:76329-86049	2.54834	5.50482	4.38261	3.62046	2.71565	5.55204	0.0739676	0.579303
ENSONIT00000000242	ENSONIG00000000188			0.442535	0.419107	0.35921														ENSONIG00000000188	col5a3b	GL831395.1:607539-650390	1.01406	1.4276	2.89589	0.599385	1.20243	1.11709	0.0385356	0.213589
ENSONIT00000000244	ENSONIG00000000189	mediator complex subunit 13-like [Source:HGNC Symbol;Acc:22962]		0.776533	1.04127	0.636715	1.6785	28.4778	5.14583	11.7048	1.65509	4.89494	1.36627	2.35643	1.94776	5.02139	GO:0006357; regulation of transcription from RNA polymerase II promoter; Biological Process GO:0016592; mediator complex; Cellular Component GO:0001104; RNA polymerase II transcription cofactor activity; Molecular Function	IPR009401; Mediator complex, subunit Med13 IPR021643; Mediator complex, subunit Med13, N-terminal, metazoa/fungi	NA	ENSONIG00000000189	MED13L	GL831315.1:255666-340772	5.17418	5.6728	4.59677	3.53182	3.66647	4.2626	0.507675	0.678292
ENSONIT00000000246	ENSONIG00000000190	histidine decarboxylase [Source:HGNC Symbol;Acc:4855]		0.0452656	0.0281497	0.001	0.675663	6.83719	0.077835	0	0.132179	0.298669	0.0561002	0	0.0205766	0.386393	GO:0019752; carboxylic acid metabolic process; Biological Process GO:0016831; carboxy-lyase activity; Molecular Function GO:0030170; pyridoxal phosphate binding; Molecular Function	IPR002129; Pyridoxal phosphate-dependent decarboxylase IPR010977; Aromatic-L-amino-acid decarboxylase	K01590; Metabolism; Amino Acid Metabolism; Histidine metabolism [PATH:ko00340]	ENSONIG00000000190	hdc	GL831420.1:523807-526945	0.0456862	0.0505331	0.0650303	0.0442781	0.0395384	0.042457	0	0
ENSONIT00000000247	ENSONIG00000000191	zinc finger and BTB domain containing 45 [Source:HGNC Symbol;Acc:23715]		5.81305	3.59779	2.98399	0.826375	0	5.16442	4.55981	0.323324	2.43526	0.297326	0.888384	0.931156	2.74688	GO:0005622; intracellular; Cellular Component GO:0005515; protein binding; Molecular Function GO:0008270; zinc ion binding; Molecular Function	IPR013069; BTB/POZ IPR007087; Zinc finger, C2H2 IPR000210; BTB/POZ-like IPR015880; Zinc finger, C2H2-like	NA	ENSONIG00000000191	-	GL831280.1:568155-574854	0.759871	1.36667	0.667695	0.730402	0.649872	1.51551	0.0484732	0.623157
ENSONIT00000000248	ENSONIG00000000192	solute carrier family 27 (fatty acid transporter), member 2 [Source:HGNC Symbol;Acc:10996]		13.0328	8.57643	9.24807	0.132739	0.537286	12.0189	17.2747	10.387	3.98994	7.71491	21.6218	15.7331	1.40433	GO:0008152; metabolic process; Biological Process GO:0003824; catalytic activity; Molecular Function	IPR000873; AMP-dependent synthetase/ligase	K08746; Cellular Processes; Transport and Catabolism; Peroxisome [PATH:ko04146] Organismal Systems; Endocrine System; PPAR signaling pathway [PATH:ko03320]	ENSONIG00000000192	zgc:158482	GL831420.1:572422-584647	5.85933	9.63383	8.68276	4.11726	4.33129	4.77421	6.68456	0.74519
ENSONIT00000000249	ENSONIG00000000193	mitochondrial fission process 1 [Source:HGNC Symbol;Acc:26945]		17.3561	15.2906	12.8259	2.8213	4.82324	15.2612	10.1032	12.6703	25.4485	6.89855	14.263	9.92185	50.6474	NA	IPR019560; Mitochondrial 18kDa protein	NA	ENSONIG00000000193	MTFP1	GL831315.1:357102-364791	18.0477	19.6007	27.9227	22.2992	30.4846	51.746	4.74248	18.0276
ENSONIT00000000250	ENSONIG00000000194	delta-like 1 (Drosophila) [Source:HGNC Symbol;Acc:2908]		0.944061	0.542948	0.89825	0.924891	2.94146	0.37291	0.54457	0	0.340697	0	0.0397717	0.0140833	0.462805	GO:0007154; cell communication; Biological Process GO:0007219; Notch signaling pathway; Biological Process GO:0007275; multicellular organismal development; Biological Process GO:0016020; membrane; Cellular Component GO:0016021; integral to membrane; Cellular Component GO:0005515; protein binding; Molecular Function GO:0005509; calcium ion binding; Molecular Function	IPR006209; EGF-like domain IPR011651; Notch ligand, N-terminal IPR001774; Delta/Serrate/lag-2 (DSL) protein IPR006210; Epidermal growth factor-like IPR001881; EGF-like calcium-binding IPR000742; Epidermal growth factor-like domain	K06051; Environmental Information Processing; Signal Transduction; Notch signaling pathway [PATH:ko04330]	ENSONIG00000000194	dla	GL831280.1:586864-592597	0.904551	0.369677	0.223647	0.268546	0.30846	0.491946	0.0483508	0.210474
ENSONIT00000000251	ENSONIG00000000195			0.0511333	0.023849	0.0449356	0	0.827517	0	0	0.223969	0	0.126745	0.196925	0.0348659	0.245521	NA	NA	NA	ENSONIG00000000195	-	GL831315.1:380998-382463	0	0	0	0	0.161276	0	0.0665278	0.424028
ENSONIT00000000252	ENSONIG00000000196	lectin, mannose-binding 2-like [Source:HGNC Symbol;Acc:19263]		1.85788	0.777103	0.673994	0	0	1.12291	0.91259	5.80362	10.2412	3.80039	5.46733	6.99541	9.17957	GO:0016020; membrane; Cellular Component	IPR005052; Legume-like lectin	NA	ENSONIG00000000196	LMAN2L (1 of many)	GL831315.1:387521-396926	1.11653	1.69765	0.717488	0.870935	2.77671	1.23576	9.10084	10.7308
ENSONIT00000000254	ENSONIG00000000197			0.80498	0.121469	0.145643	0	1.39168	0	0	0	0	0.0333052	0.413974	0.366474	0.0860219	GO:0007264; small GTPase mediated signal transduction; Biological Process GO:0015031; protein transport; Biological Process GO:0006184; GTP catabolic process; Biological Process GO:0007165; signal transduction; Biological Process GO:0005622; intracellular; Cellular Component GO:0016020; membrane; Cellular Component GO:0005525; GTP binding; Molecular Function GO:0003924; GTPase activity; Molecular…	IPR001806; Small GTPase superfamily IPR013684; Mitochondrial Rho-like IPR020849; Small GTPase superfamily, Ras type IPR003579; Small GTPase superfamily, Rab type IPR003578; Small GTPase superfamily, Rho type IPR005225; Small GTP-binding protein domain	NA	ENSONIG00000000197	si:ch211-133l11.10	GL831280.1:606636-610877	0.0339029	0.077818	0.0244673	0.101181	0.120408	0.189524	0.0896346	0.375002
ENSONIT00000000255	ENSONIG00000000198	glycine amidinotransferase (L-arginine:glycine amidinotransferase) [Source:HGNC Symbol;Acc:4175]		120.999	215.758	255.69	2.96479	6.63262	274.059	5.15437	0.380325	0.229167	0.344364	0.334401	1.56305	0.833844	NA	NA	K00613; Metabolism; Amino Acid Metabolism; Glycine, serine and threonine metabolism [PATH:ko00260] Metabolism; Amino Acid Metabolism; Arginine and proline metabolism [PATH:ko00330]	ENSONIG00000000198	gatm	GL831420.1:588589-593265	12.3374	107.421	27.456	105.226	341.628	233.723	0.197469	0.441683
ENSONIT00000000256	ENSONIG00000000199	Rho GTPase activating protein 19 [Source:HGNC Symbol;Acc:23724]		3.14338	0.978513	1.35917	0.0773273	0.894277	3.59881	1.47777	12.3439	22.1497	16.231	16.759	10.8326	27.7268	GO:0007165; signal transduction; Biological Process GO:0005622; intracellular; Cellular Component	IPR000198; Rho GTPase-activating protein domain	NA	ENSONIG00000000199	arhgap19	GL831280.1:632607-643887	0.591036	0.895215	0.419522	0.449636	2.36113	1.99773	8.69136	9.90456
ENSONIT00000000257	ENSONIG00000000200	phosphodiesterase 8A [Source:HGNC Symbol;Acc:8793]		16.3938	19.7167	16.128	1.55679	3.60081	6.48054	8.15335	9.00236	6.59391	5.43332	15.3768	22.3328	6.76015	GO:0007165; signal transduction; Biological Process GO:0000160; two-component signal transduction system (phosphorelay); Biological Process GO:0006355; regulation of transcription, DNA-dependent; Biological Process GO:0004871; signal transducer activity; Molecular Function GO:0000156; two-component response regulator activity; Molecular Function GO:0004114; 3',5'-cyclic-nucleotide phosphodiestera…	IPR002073; 3'5'-cyclic nucleotide phosphodiesterase, catalytic domain IPR001789; Signal transduction response regulator, receiver domain IPR013767; PAS fold IPR013656; PAS fold-4 IPR000014; PAS IPR003607; Metal-dependent phosphohydrolase, HD domain IPR023088; 3'5'-cyclic nucleotide phosphodiesterase	K01120; Metabolism; Nucleotide Metabolism; Purine metabolism [PATH:ko00230] Human Diseases; Substance Dependence; Morphine addiction [PATH:ko05032]	ENSONIG00000000200	PDE8A	GL831420.1:630107-654258	6.19261	10.2241	10.4412	7.57175	9.75611	6.88342	10.9859	3.14314
ENSONIT00000000258	ENSONIG00000000201			8.09084	8.81761	4.15347														ENSONIG00000000201	wbp1	GL831315.1:404764-409026	20.5538	21.7213	12.3522	14.2616	14.0829	24.2157	2.3489	18.0414
ENSONIT00000000260	ENSONIG00000000202	slit homolog 1 (Drosophila) [Source:HGNC Symbol;Acc:11085]		1.0445	2.54823	0.630598	0.423265	5.17033	0.0792339	0.790371	0.0414012	0.218282	0.0292864	0.0819047	0.0257802	0.257182	GO:0005515; protein binding; Molecular Function GO:0005509; calcium ion binding; Molecular Function	IPR006209; EGF-like domain IPR001611; Leucine-rich repeat IPR001791; Laminin G domain IPR000372; Leucine-rich repeat-containing N-terminal IPR000483; Cysteine-rich flanking region, C-terminal IPR003591; Leucine-rich repeat, typical subtype IPR003590; Leucine-rich repeat, ribonuclease inhibitor subtype IPR006210; Epidermal growth factor-like IPR001881; EGF-like calcium-binding IPR003645; Follistat…	NA	ENSONIG00000000202	slit1b	GL831280.1:646257-717628	0.136207	1.18901	0.142177	0.310006	0.24448	0.899503	0.0541965	0.0392794
ENSONIT00000000261	ENSONIG00000000203			0.822485	0.137005	0.154884	0	0.259049	0.103216	0.542625	0	4.75273	0.0991917	4.16112	0	26.9005	GO:0007186; G-protein coupled receptor signaling pathway; Biological Process GO:0007264; small GTPase mediated signal transduction; Biological Process GO:0015031; protein transport; Biological Process GO:0006886; intracellular protein transport; Biological Process GO:0005622; intracellular; Cellular Component GO:0005634; nucleus; Cellular Component GO:0005737; cytoplasm; Cellular Component GO:000…	IPR006689; Small GTPase superfamily, ARF/SAR type IPR006762; Gtr1/RagA G protein IPR001019; Guanine nucleotide binding protein (G-protein), alpha subunit IPR013684; Mitochondrial Rho-like IPR001806; Small GTPase superfamily IPR019009; Signal recognition particle receptor, beta subunit IPR000795; Protein synthesis factor, GTP-binding IPR024156; Small GTPase superfamily, ARF type IPR006687; Small G…	NA	ENSONIG00000000203	-	GL831315.1:410576-414087	0	0.11163	0	0	0	0.173666	0	10.6144
ENSONIT00000000262	ENSONIG00000000204	olfactomedin 2 [Source:HGNC Symbol;Acc:17189]		1.0505	1.39729	0.606898	0.471278	11.8915	0.868646	7.26509	0.201153	3.33317	0.151778	0.884321	0.10438	2.05809	GO:0005515; protein binding; Molecular Function	IPR003112; Olfactomedin-like IPR022082; Neurogenesis glycoprotein	NA	ENSONIG00000000204	olfm2b	GL831395.1:658906-693770	1.38307	2.32511	0.785882	1.87885	0.765795	4.82268	0.0191875	0.319946
ENSONIT00000000263	ENSONIG00000000205	paired box 8 [Source:HGNC Symbol;Acc:8622]		27.499	22.3036	12.5368	1.19145	9.6963	2.05371	13.2554	2.20996	15.605	0.60577	2.12527	0.129011	1.53937	GO:0006355; regulation of transcription, DNA-dependent; Biological Process GO:0043049; otic placode formation; Biological Process GO:0007422; peripheral nervous system development; Biological Process GO:0003677; DNA binding; Molecular Function	IPR001523; Paired box protein, N-terminal IPR022130; Paired-box protein 2 C-terminal	K09293; Human Diseases; Cancers; Pathways in cancer [PATH:ko05200] Human Diseases; Cancers; Transcriptional misregulation in cancers [PATH:ko05202] Human Diseases; Cancers; Thyroid cancer [PATH:ko05216]	ENSONIG00000000205	pax8	GL831315.1:437123-446164	20.1326	23.5529	4.88691	7.26135	1.05651	5.11877	0	0.0495368
ENSONIT00000000264	ENSONIG00000000206			12.3071	9.04355	6.53235	0.049066	7.94416	7.95845	12.1238	21.9618	20.5901	20.75	24.8463	22.7605	22.9246	NA	NA	NA	ENSONIG00000000206	-	GL831420.1:657141-670725	3.951	4.06788	3.88231	2.1856	4.20422	4.14109	16.0103	11.4344
ENSONIT00000000265	ENSONIG00000000207	fibronectin type III and SPRY domain containing 2 [Source:HGNC Symbol;Acc:18024]		3.57593	4.8675	4.40173	0.405519	3.92234	1.78366	2.52039	1.44238	5.21468	0.701972	2.30815	2.08372	6.49334	GO:0005515; protein binding; Molecular Function	IPR003961; Fibronectin, type III IPR003877; SPla/RYanodine receptor SPRY IPR003879; Butyrophylin-like IPR001870; B30.2/SPRY domain	NA	ENSONIG00000000207	FSD2	GL831420.1:657141-670725	5.19023	3.4708	1.01545	0.891365	0.705825	1.24227	1.67549	2.41268
ENSONIT00000000266	ENSONIG00000000208			10.913	10.3312	6.34595	0.454165	0	9.62667	14.9749	0.888473	29.3107	0.678766	5.66363	0.940515	27.5633	GO:0032012; regulation of ARF protein signal transduction; Biological Process GO:0005622; intracellular; Cellular Component GO:0005086; ARF guanyl-nucleotide exchange factor activity; Molecular Function GO:0005515; protein binding; Molecular Function GO:0005543; phospholipid binding; Molecular Function	IPR000904; SEC7-like IPR001849; Pleckstrin homology domain IPR001605; Pleckstrin homology domain, spectrin-type	K12494; Cellular Processes; Transport and Catabolism; Endocytosis [PATH:ko04144]	ENSONIG00000000208	-	GL831315.1:455502-460319	8.59246	4.56187	9.74302	4.75735	8.45815	5.28196	0.280862	13.3969
ENSONIT00000000267	ENSONIG00000000209	WAS protein homolog associated with actin, golgi membranes and microtubules [Source:HGNC Symbol;Acc:30493]		9.3134	10.6045	7.11445	5.19187	2.64805	7.42249	11.8963	19.4593	23.5385	15.3155	26.4521	20.1476	25.5951	GO:0003779; actin binding; Molecular Function	IPR003124; WH2 domain	NA	ENSONIG00000000209	WHAMM	GL831420.1:671441-685437	5.58616	3.60633	2.35524	2.38317	3.44121	4.96323	9.13723	5.93159
ENSONIT00000000268	ENSONIG00000000210	microfibrillar-associated protein 4 [Source:HGNC Symbol;Acc:7035]		3.91075	7.72352	7.73265	0	1.58224	1.89129	1.79524	0.401472	3.62864	0.53012	1.52964	0.583317	3.76533	GO:0007165; signal transduction; Biological Process GO:0005102; receptor binding; Molecular Function	IPR002181; Fibrinogen, alpha/beta/gamma chain, C-terminal globular	NA	ENSONIG00000000210	MFAP4 (1 of many)	GL831395.1:718389-720421	2.4221	1.11903	0.14626	0.896889	2.14154	1.86089	0.423646	0.91359
ENSONIT00000000269	ENSONIG00000000211			2.49018	1.84228	1.64126	0.0600808	4.86377	2.49163	3.55774	4.70139	10.3399	2.82017	3.05894	3.92287	10.7199	GO:0005622; intracellular; Cellular Component GO:0008270; zinc ion binding; Molecular Function	IPR007087; Zinc finger, C2H2 IPR015880; Zinc finger, C2H2-like	NA	ENSONIG00000000211	ZNF664	GL831315.1:469461-472547	1.28128	1.67201	2.0054	0.852697	1.47214	2.23258	1.34804	2.25997
ENSONIT00000000270	ENSONIG00000000212	suppressor APC domain containing 2 [Source:HGNC Symbol;Acc:28055]		0.232522	0.0559743	0.0395494	1.13342	0.714974	5.62631	3.27263	1.61258	57.3284	0.342211	13.895	1.50621	43.958	NA	NA	NA	ENSONIG00000000212	SAPCD2	GL831315.1:481006-492444	3.32216	3.42973	2.92028	2.77952	6.11519	5.4321	0.541134	21.8487
ENSONIT00000000272	ENSONIG00000000213	thyroid hormone receptor interactor 10 [Source:HGNC Symbol;Acc:12304]		17.3791	14.3499	10.2072	1.04079	2.16659	12.2136	23.0651	19.7093	8.4244	7.58933	18.2842	34.756	5.95202	GO:0005515; protein binding; Molecular Function	IPR001060; Fps/Fes/Fer/CIP4 homology IPR001452; Src homology-3 domain IPR011511; Variant SH3	NA	ENSONIG00000000213	TRIP10 (1 of many)	GL831395.1:722906-741198	7.35402	5.35379	7.83404	6.54382	4.30034	6.9907	3.72665	0.889484
ENSONIT00000000273	ENSONIG00000000214	homer homolog 2 (Drosophila) [Source:HGNC Symbol;Acc:17513]		8.27361	10.8496	9.49534	0.173661	1.74057	13.3369	5.79613	49.0115	17.3317	27.4282	47.1558	54.7199	23.8017	GO:0005515; protein binding; Molecular Function	IPR000697; EVH1	K15010; Organismal Systems; Nervous System; Glutamatergic synapse [PATH:ko04724]	ENSONIG00000000214	HOMER2	GL831420.1:691652-721522	10.9403	11.242	14.2847	8.2618	2.31127	2.8025	12.5602	6.43642
ENSONIT00000000274	ENSONIG00000000215			4.94904	4.50395	4.18122	0.0563052	0.716277	1.40103	2.47031	1.32179	1.85838	0.324135	0.65857	1.0837	1.69047	GO:0005622; intracellular; Cellular Component GO:0008270; zinc ion binding; Molecular Function	IPR007087; Zinc finger, C2H2 IPR015880; Zinc finger, C2H2-like	NA	ENSONIG00000000215	-	GL831731.1:8303-31112	1.44257	1.89151	1.70763	1.85921	2.04341	1.7442	0.62606	2.31047
ENSONIT00000000275	ENSONIG00000000216			5.36543	5.80363	4.02957	0.425999	3.57179	3.60696	4.7012	1.16672	4.26831	0.495189	0.806019	0.570828	2.98431	GO:0005622; intracellular; Cellular Component GO:0008270; zinc ion binding; Molecular Function	IPR007087; Zinc finger, C2H2 IPR015880; Zinc finger, C2H2-like	NA	ENSONIG00000000216	-	GL831731.1:60356-62188	4.51471	4.04558	3.08493	4.29591	3.52361	2.53004	0.390984	2.06712
ENSONIT00000000276	ENSONIG00000000217	transmembrane protein 141 [Source:HGNC Symbol;Acc:28211]		3.47277	2.64127	3.5417	3.27107	0.378293	6.9335	7.74796	18.9414	10.0252	5.86648	18.3422	20.4015	4.30246	NA	NA	NA	ENSONIG00000000217	tmem141	GL831315.1:493859-500730	5.2933	3.92011	4.1807	3.49638	4.13355	3.46362	34.0781	5.18597
ENSONIT00000000277	ENSONIG00000000218			4.77508	6.33738	3.07047	0.0362174	0.251309	2.18622	3.0415	0.226725	1.28076	0.192456	0.672799	0.211769	0.93203	GO:0005622; intracellular; Cellular Component GO:0008270; zinc ion binding; Molecular Function	IPR007087; Zinc finger, C2H2 IPR015880; Zinc finger, C2H2-like	NA	ENSONIG00000000218	-	GL831731.1:82228-84387	2.55132	3.76358	1.6045	1.02767	2.12971	2.3759	0.236719	2.97634
ENSONIT00000000278	ENSONIG00000000219	zinc finger, MYND-type containing 19 [Source:HGNC Symbol;Acc:21146]		8.2307	9.98754	9.54233	0.632693	1.25434	6.33058	5.59549	76.8097	30.6843	55.4743	72.8209	82.2689	36.9573	GO:0008270; zinc ion binding; Molecular Function	IPR002893; Zinc finger, MYND-type	NA	ENSONIG00000000219	zmynd19	GL831315.1:510374-515932	11.8208	19.4893	10.8499	12.1596	12.9082	12.2705	57.6187	20.5745
ENSONIT00000000279	ENSONIG00000000220	SH2 domain containing 3A [Source:HGNC Symbol;Acc:16885]		0.391544	0.182619	0.382318	0.974072	0.633655	18.3465	23.8096	20.1989	8.97035	18.8444	14.1996	15.0398	6.14491	GO:0007264; small GTPase mediated signal transduction; Biological Process GO:0005622; intracellular; Cellular Component GO:0005515; protein binding; Molecular Function GO:0005085; guanyl-nucleotide exchange factor activity; Molecular Function	IPR000980; SH2 domain IPR001895; Guanine-nucleotide dissociation stimulator CDC25	NA	ENSONIG00000000220	SH2D3A	GL831395.1:743596-756660	22.8418	6.02125	12.2316	7.99694	7.17643	5.86351	17.1577	1.78829
ENSONIT00000000281	ENSONIG00000000221	BTB (POZ) domain containing 1 [Source:HGNC Symbol;Acc:1120]		23.4744	18.8915	16.5337	3.92738	13.881	14.0913	15.5121	43.4395	29.2333	41.6027	30.3914	37.7143	28.6423	GO:0005515; protein binding; Molecular Function	IPR012983; PHR IPR013069; BTB/POZ IPR011705; BTB/Kelch-associated IPR000210; BTB/POZ-like	NA	ENSONIG00000000221	BTBD1	GL831420.1:734422-740741	15.4385	19.162	12.2677	11.1846	16.543	14.958	46.0688	13.5176
ENSONIT00000000282	ENSONIG00000000222			2.10257	2.68203	2.71592	1.11787	1.79868	7.1667	4.91889	26.3946	3.20834	21.8671	4.84882	25.2692	1.38974	GO:0005622; intracellular; Cellular Component GO:0008270; zinc ion binding; Molecular Function GO:0005515; protein binding; Molecular Function	IPR003877; SPla/RYanodine receptor SPRY IPR000315; Zinc finger, B-box IPR006574; SPRY-associated IPR018355; SPla/RYanodine receptor subgroup IPR003879; Butyrophylin-like IPR001870; B30.2/SPRY domain	NA	ENSONIG00000000222	bspry	GL831315.1:524132-531961	2.7698	3.02694	7.33687	3.94013	2.80434	4.26447	6.62538	0.243016
ENSONIT00000000283	ENSONIG00000000223	solute carrier family 7 (anionic amino acid transporter light chain, xc- system), member 11 [Source:HGNC Symbol;Acc:11059]		0.351465	1.14749	0.517349	0	0.386734	0.712672	2.13773	0	0.0985465	0.129573	0.0862796	0.244415	0.741044	GO:0003333; amino acid transmembrane transport; Biological Process GO:0006810; transport; Biological Process GO:0055085; transmembrane transport; Biological Process GO:0016020; membrane; Cellular Component GO:0015171; amino acid transmembrane transporter activity; Molecular Function	IPR004841; Amino acid permease domain IPR002293; Amino acid/polyamine transporter I	NA	ENSONIG00000000223	slc7a11	GL831793.1:51988-98131	6.70969	0.546345	0.798087	0.658872	0.758469	0.641317	0.085652	0.0785655
ENSONIT00000000285	ENSONIG00000000224	G protein-coupled receptor 116 [Source:HGNC Symbol;Acc:19030]					0	0	0.0534226	0.0936175	0.0907217	0.204993	0.0128349	0	0	0.298354	GO:0007218; neuropeptide signaling pathway; Biological Process GO:0007186; G-protein coupled receptor signaling pathway; Biological Process GO:0007166; cell surface receptor signaling pathway; Biological Process GO:0016020; membrane; Cellular Component GO:0016021; integral to membrane; Cellular Component GO:0004930; G-protein coupled receptor activity; Molecular Function GO:0004888; transmembrane…	IPR000832; GPCR, family 2, secretin-like IPR000203; GPS domain IPR000082; SEA IPR017981; GPCR, family 2-like IPR008078; GPCR, family 2, Ig-hepta receptor	NA	ENSONIG00000000224	-	GL831315.1:575432-580661	0.0600935	0	0.232211	0	0	0.0906071	0.0404803	0.14606
ENSONIT00000000288	ENSONIG00000000225	transmembrane 6 superfamily member 1 [Source:HGNC Symbol;Acc:11860]		1.51922	1.26559	1.39933	0	1.03059	0.513291	0.269846	0.784498	20.4838	0.271303	4.48351	0.569916	14.3013	NA	IPR016964; Transmembrane protein 6/97	NA	ENSONIG00000000225	TM6SF1	GL831420.1:741651-749073	0.787077	0.567335	0.327407	0.457105	0.679062	0.309293	1.12672	9.20346
ENSONIT00000000289	ENSONIG00000000226			1.50362	2.29092	1.25731														ENSONIG00000000226	VAV1	GL831395.1:758104-787745	19.304	4.00873	11.2711	6.88329	17.9325	11.0918	6.87716	3.99967
ENSONIT00000000291	ENSONIG00000000227			33.4033	22.4049	26.7142	44.9529	65.3142	28.4637	24.5346	106.097	56.7826	92.0609	135.322	112.504	70.0866	GO:0004842; ubiquitin-protein ligase activity; Molecular Function GO:0008270; zinc ion binding; Molecular Function	IPR003126; Zinc finger, N-recognin IPR013993; Zinc finger, N-recognin, metazoa	NA	ENSONIG00000000227	ubr7	GL831315.1:998696-1011840	13.4438	12.3914	11.6483	14.231	25.6134	19.5856	120.82	32.3171
ENSONIT00000000292	ENSONIG00000000228	zinc finger (CCCH type), RNA-binding motif and serine/arginine rich 2 [Source:HGNC Symbol;Acc:23019]		9.18827	6.64837	5.7241	45.0464	11.2033	8.05526	11.2833	32.0448	32.1813	38.0625	23.3584	17.1219	25.9874	GO:0003676; nucleic acid binding; Molecular Function GO:0008270; zinc ion binding; Molecular Function	IPR000571; Zinc finger, CCCH-type IPR000504; RNA recognition motif domain IPR003954; RNA recognition motif domain, eukaryote IPR009145; U2 auxiliary factor small subunit	NA	ENSONIG00000000228	zrsr2	GL831420.1:750520-762560	3.13941	3.11406	3.61145	3.42402	4.2587	3.81094	10.0431	9.37335
ENSONIT00000000293	ENSONIG00000000229	adaptor-related protein complex 1, sigma 2 subunit [Source:HGNC Symbol;Acc:560]		44.5051	31.9638	30.1181	0	2.71509	21.516	29.2789	33.6804	23.3692	28.1855	36.7029	48.491	44.0819	GO:0015031; protein transport; Biological Process GO:0008565; protein transporter activity; Molecular Function	IPR022775; AP complex, mu/sigma subunit IPR016635; Adaptor protein complex, sigma subunit	K12394; Cellular Processes; Transport and Catabolism; Lysosome [PATH:ko04142]	ENSONIG00000000229	ap1s2 (1 of many)	GL831420.1:750520-762560	34.8557	41.6307	29.6067	32.8771	64.0945	46.5357	110.747	28.8124
ENSONIT00000000294	ENSONIG00000000230			1.30926	0.438416	0.206513	0	0	1.62786	1.14106	3.13301	2.7762	2.65947	2.83572	2.63945	0.0673428	NA	NA	NA	ENSONIG00000000230	-	GL831909.1:20483-21513	0	0	0	0	0.162021	0	0.231525	0
ENSONIT00000000295	ENSONIG00000000231	ankyrin repeat and SOCS box containing 2 [Source:HGNC Symbol;Acc:16012]		2.91749	2.95908	3.73389	0.194412	0.524614	0.298612	0.226758	0.70994	1.68056	0.875257	0.334401	0.18946	1.87152	GO:0035556; intracellular signal transduction; Biological Process GO:0005515; protein binding; Molecular Function	IPR002110; Ankyrin repeat IPR001496; SOCS protein, C-terminal IPR020683; Ankyrin repeat-containing domain	NA	ENSONIG00000000231	asb2a.1	GL831315.1:1021287-1034342	3.53729	2.08215	0.172092	0.391895	0.0480846	0.205039	0.208182	0.655663
ENSONIT00000000296	ENSONIG00000000232			0.725949	0.773917	1.07542	0.0580499	2.28255	5.1893	14.5937	1.09019	12.3169	1.02824	2.99548	1.10314	18.4576	GO:0005515; protein binding; Molecular Function	IPR003599; Immunoglobulin subtype IPR003598; Immunoglobulin subtype 2 IPR007110; Immunoglobulin-like	K06498; Cellular Processes; Transport and Catabolism; Phagosome [PATH:ko04145] Organismal Systems; Immune System; Hematopoietic cell lineage [PATH:ko04640] Organismal Systems; Immune System; Fc gamma R-mediated phagocytosis [PATH:ko04666] Organismal Systems; Development; Osteoclast differentiation [PATH:ko04380] Human Diseases; Cancers; Transcriptional misregulation in cancers [PATH:ko05202] Huma…	ENSONIG00000000232	-	GL831909.1:34047-44174	2.41991	0.261415	0.734654	0.279073	1.05768	1.23586	0.155378	19.0247
ENSONIT00000000297	ENSONIG00000000233			1.83364	2.14697	1.49389	0.133643	2.72018	9.85305	10.2304	0.962109	1.26027	0.674658	1.2689	0.403739	1.16169	GO:0015684; ferrous iron transport; Biological Process GO:0016021; integral to membrane; Cellular Component GO:0005525; GTP binding; Molecular Function GO:0015093; ferrous iron transmembrane transporter activity; Molecular Function	IPR006703; AIG1 IPR011619; Ferrous iron transport protein B, N-terminal	NA	ENSONIG00000000233	-	GL831603.1:71786-77279	0.837389	0.995482	1.81372	1.16322	1.31806	2.25828	0.116113	0.194278
ENSONIT00000000298	ENSONIG00000000234			7.11339	10.0927	6.28359	0.556026	4.42086	8.43366	13.4259	1.14213	5.48919	1.16443	2.63807	1.03857	5.7037	GO:0003950; NAD+ ADP-ribosyltransferase activity; Molecular Function	IPR002589; Appr-1-p processing IPR012317; Poly(ADP-ribose) polymerase, catalytic domain IPR004170; WWE domain	NA	ENSONIG00000000234	-	GL831603.1:102667-127192	1.16531	2.47449	2.14038	2.20343	2.77921	5.92597	1.16462	1.93874
ENSONIT00000000299	ENSONIG00000000235	CD22 molecule [Source:HGNC Symbol;Acc:1643]		0.001	0.126525	0.153254	0.0542308	0.501736	0.59974	2.13115	0.509235	0.894958	0.600371	0.485058	0.924864	0.930395	GO:0005515; protein binding; Molecular Function	IPR013098; Immunoglobulin I-set IPR013151; Immunoglobulin IPR003599; Immunoglobulin subtype IPR003598; Immunoglobulin subtype 2 IPR007110; Immunoglobulin-like	NA	ENSONIG00000000235	-	GL832016.1:35744-41571	0.222963	0.208225	0.225576	0	0.169998	0.369647	0.432756	0.950212
ENSONIT00000000302	ENSONIG00000000236	ankyrin repeat and SOCS box containing 2 [Source:HGNC Symbol;Acc:16012]		0.131878	0.143521	0.0386312	0.0615156	1.28055	0.708647	1.15904	6.93168	0.580101	8.79875	8.2109	13.2786	1.12573	GO:0035556; intracellular signal transduction; Biological Process GO:0005515; protein binding; Molecular Function	IPR002110; Ankyrin repeat IPR001496; SOCS protein, C-terminal IPR020683; Ankyrin repeat-containing domain	NA	ENSONIG00000000236	-	GL831315.1:1037393-1046570	0.267417	0.239231	0.0479968	0.0646813	0.672148	0.197648	10.8272	0.0858171
ENSONIT00000000303	ENSONIG00000000237	protein phosphatase 4, regulatory subunit 4 [Source:HGNC Symbol;Acc:23788]		0.692672	0.566476	0.40859	0	0.184272	0.526189	1.08649	0.374052	49.5851	0.152878	13.192	0.207039	57.0418	GO:0005515; protein binding; Molecular Function	IPR000357; HEAT IPR021133; HEAT, type 2	NA	ENSONIG00000000237	ppp4r4	GL831315.1:1061188-1074167	2.33169	1.12719	0.974587	1.1855	1.54735	1.05274	0.378227	30.984
ENSONIT00000000304	ENSONIG00000000238			1.56294	2.4947	4.45625	0.0972062	0.449669	5.77815	6.64574	1.36917	26.5834	1.03309	5.14978	0.56838	24.2371	NA	NA	NA	ENSONIG00000000238	-	AERX01074624.1:499-1315	1.46995	2.69035	3.5139	1.50841	3.52741	2.9079	1.3402	11.9119
ENSONIT00000000305	ENSONIG00000000239			7.89219	5.58357	5.22276	0.287216	0.66432	4.30127	11.4416	20.9017	3.21632	16.2163	12.1531	26.6254	2.29951	NA	NA	NA	ENSONIG00000000239	-	AERX01072586.2:167-3504	4.1456	3.56906	3.55405	3.66461	2.58386	5.46124	17.6229	2.56816
ENSONIT00000000306	ENSONIG00000000240			0.926742	1.03988	1.17638	0.0703335	0.488037	11.408	11.0937	0.110074	0.165814	0.062291	0	0	0.0804437	GO:0015684; ferrous iron transport; Biological Process GO:0016021; integral to membrane; Cellular Component GO:0005525; GTP binding; Molecular Function GO:0015093; ferrous iron transmembrane transporter activity; Molecular Function	IPR006703; AIG1 IPR006073; GTP binding domain IPR011619; Ferrous iron transport protein B, N-terminal	NA	ENSONIG00000000240	-	GL831603.1:142258-151840	0.842695	1.56496	2.91858	2.2491	0.517775	2.09801	0.179653	0.43189
ENSONIT00000000307	ENSONIG00000000241			13.3677	19.27	14.3666	2.90307	1.70232	29.6935	51.2422	9.79065	11.5675	19.2471	6.32974	6.79387	10.6392	GO:0003950; NAD+ ADP-ribosyltransferase activity; Molecular Function	IPR012317; Poly(ADP-ribose) polymerase, catalytic domain IPR002589; Appr-1-p processing	NA	ENSONIG00000000241	-	GL831603.1:163542-175218	6.4503	9.47067	13.4751	10.2418	13.5607	24.0301	11.4317	2.24618
ENSONIT00000000308	ENSONIG00000000242	serpin peptidase inhibitor, clade A (alpha-1 antiproteinase, antitrypsin), member 10 [Source:HGNC Symbol;Acc:15996]		73.2904	70.3315	44.6947	0.318676	1.59702	53.1818	94.3534	10.6397	46.0791	6.9383	14.3248	14.4927	54.2171	NA	IPR023796; Serpin domain	NA	ENSONIG00000000242	serpina10a	GL831315.1:1081506-1084109	48.0155	41.8722	28.7125	28.9471	34.2732	44.4681	1.56826	6.6549
ENSONIT00000000309	ENSONIG00000000243			0.250523	0.162568	0.105293	0.0914544	0.987144	4.24224	6.31814	0.715641	1.58112	0.431983	1.30041	0.415915	0.906538	GO:0005525; GTP binding; Molecular Function	IPR006703; AIG1	NA	ENSONIG00000000243	-	GL831603.1:230225-252425	0.0366128	0.554446	1.36458	0.0361306	1.06538	0.043567	0.152796	0.708019
ENSONIT00000000312	ENSONIG00000000244			0.0676298	0.134058	0.0520035	0	0.0547244	0.0654136	0.127367	0	0.0557789	0.0209544	0.0325571	0	0.0811825	NA	NA	NA	ENSONIG00000000244	-	GL831987.1:1387-4039	0	0	0.214917	0.0643706	0	0.0260417	0	0.0470854
ENSONIT00000000313	ENSONIG00000000245	X-ray repair complementing defective repair in Chinese hamster cells 3 [Source:HGNC Symbol;Acc:12830]		9.26897	8.78766	7.63165	0.181833	2.66363	9.63552	9.52751	12.9006	12.2887	18.2781	24.6458	16.9818	21.8716	GO:0006259; DNA metabolic process; Biological Process GO:0003677; DNA binding; Molecular Function GO:0005524; ATP binding; Molecular Function GO:0008094; DNA-dependent ATPase activity; Molecular Function	IPR013632; DNA recombination and repair protein Rad51, C-terminal IPR014774; Circadian clock protein KaiC/DNA repair protein RadA IPR016467; DNA recombination and repair protein, RecA-like IPR020588; DNA recombination/repair protein RecA/RadB, ATP-binding domain	K10880; Genetic Information Processing; Replication and Repair; Homologous recombination [PATH:ko03440]	ENSONIG00000000245	xrcc3	GL831315.1:1096512-1104939	6.88503	3.1181	4.39269	3.16614	5.40182	5.07703	27.4513	12.7314
ENSONIT00000000314	ENSONIG00000000246	BRF1 homolog, subunit of RNA polymerase III transcription initiation factor IIIB (S. cerevisiae) [Source:HGNC Symbol;Acc:11551]		14.643	12.4139	10.8243	16.4336	4.18587	9.15962	12.5079	9.27347	26.3562	10.0175	16.9902	9.15956	36.5736	GO:0045893; positive regulation of transcription, DNA-dependent; Biological Process GO:0006355; regulation of transcription, DNA-dependent; Biological Process GO:0006413; translational initiation; Biological Process GO:0005634; nucleus; Cellular Component GO:0008270; zinc ion binding; Molecular Function GO:0003743; translation initiation factor activity; Molecular Function	IPR013150; Transcription factor TFIIB, cyclin-related IPR011665; Brf1-like TBP-binding IPR013137; Zinc finger, TFIIB-type IPR013763; Cyclin-like IPR000812; Transcription factor TFIIB	NA	ENSONIG00000000246	brf1b (1 of many)	GL831315.1:1107095-1118062	6.6196	8.46892	7.21297	7.43623	10.7564	8.79245	6.50546	16.0772
ENSONIT00000000315	ENSONIG00000000247			3.5872	2.68577	1.03698	0	0	0.601851	0.468747	0.227124	0	0.064265	0	0.070714	0.248979	GO:0005515; protein binding; Molecular Function	IPR013106; Immunoglobulin V-set IPR013151; Immunoglobulin IPR013098; Immunoglobulin I-set IPR003599; Immunoglobulin subtype IPR003596; Immunoglobulin V-set, subgroup IPR007110; Immunoglobulin-like	NA	ENSONIG00000000247	-	AERX01075951.1:20-1437	0	0	0	0	0	0	0.12801	0.136299
[truncated: 21,180 more rows]
