# Supplementary material for: Desert Hedgehog mediates stem Leydig cell differentiation through Ptch2/Gli1/Sf1 signaling axis
Source: eLife. 2026 Jun 29;15:RP109979. doi: 10.7554/eLife.109979 (PMC13313686; doi:10.7554/eLife.109979)
Supplement: Supplementary file 1. [file elife-109979-supp1.xlsx]

## Sheet: Sheet1
Primer name	Sequence (5'-3')	Purpose
gRNA-dhh-F	TAATACGACTCACTATAGCGGGCCCGGTCCGCATCCCGTTTTAGAGCTAGAAATAGC	CRISPR/Cas9 in Nile tilapia
gRNA-ptch2-F	TAATACGACTCACTATAGTCCCAGGGGCCGGCGTATTGTTTTAGAGCTAGAAATAGC
gRNA-R	AGCACCGACTCGGTGCCAC
TSL-ptch1-KO-R1	GGTGCTGCAGGAGCGCCTCCCGACAGCTCCAAGGACCCGGGAG	CRISPR/Cas9 in TSL
TSL-ptch1-KO-F1	GGAGGCGCTCCTGCAGCACCGTTTTAGAGCTAGAAATAGC
TSL-ptch2-KO-R1	AATACGCCGGCCCCTGGGACCGACAGCTCCAAGGACCCGGGAG
TSL-ptch2-KO-F1	GTCCCAGGGGCCGGCGTATTGTTTTAGAGCTAGAAATAGC
TSL-gli1-KO-R1	TGGTCCTGATCCATGAGTCACGACAGCTCCAAGGACCCGGGAG
TSL-gli1-KO-F1	TGACTCATGGATCAGGACCAGTTTTAGAGCTAGAAATAGC
TSL-gli2-KO-R1	CGTGGGGTGACAGGCGAATCCGACAGCTCCAAGGACCCGGGAG
TSL-gli2-KO-F1	GATTCGCCTGTCACCCCACGGTTTTAGAGCTAGAAATAGC
TSL-gli3-KO-R1	TAGACGTAGAGGGCTCCTCACGACAGCTCCAAGGACCCGGGAG
TSL-gli3-KO-F1	TGAGGAGCCCTCTACGTCTAGTTTTAGAGCTAGAAATAGC
TSL-sf1-KO-R1	CCCAGTACCAGTACACAGCCCGACAGCTCCAAGGACCCGGGAG
TSL-sf1-KO-F1	GGCTGTGTACTGGTACTGGGGTTTTAGAGCTAGAAATAGC
Mlu-F	CTTGACGAGTTCTTCTGAACGCGTCTCGAGCCTCTAGA
sal-R	CGCCATATTGAATTGGCGGTCGACTGGCGTAATAGCCAAC
dhh-PAGE-F	TGGCACAGCTCACCCTGGTT	Mutant screening
dhh-PAGE-R	AAACTGCTTGAGGCGCATGG
dhh-test-F	ACGTGCCCCGGAACTTTATT
dhh-test-R	TAGTCATGAAGCGGTCAGCG
ptch1-PAGE-F	CTGATGATCCAGACGCCGC
ptch1-PAGE-R	CTCGAACAGAGGCAGTTATGG
ptch1-test-F	CAATTCTGGCCCCTAACCCTT
ptch1-test-R	GCTCTAACAGGGCTACACTCA
ptch2-PAGE-F	GATTCTGTGTCGCTTCGCTCT
ptch2-PAGE-R	AGTAGGTCTGGGTTCGCAGG
ptch2-test-F	ATCGGGACGAATGAAGACGG
ptch2-test-R	GACTCCGGTTTGATAGCTGC
gli1-PAGE-F	CTGCCACGCTATGTATAATCCCA
gli1-PAGE-R	GCCCATCATACCGTGGGGTG
gli1-test-F	ATTCCTTGTCACAGTTCCCTTTG
gli1-test-R	AGAGTAATCCACTCGCCTGCT
gli2-PAGE-F	GGGCAGTCCAGTCATCTCAG
gli2-PAGE-R	GACATACGGATGTGGAGGGC
gli2-test-F	GGGGAGGGGAAAGGGTGTAA
gli2-test-R	CTCCACCGCTCACTGACATT
gli3-PAGE-F	AACGCCATCAGCTCTCAGG
gli3-PAGE-R	GAACCGTGCTGCTCCTTCTT
gli3-test-F	CTCATATCCAGGGGCTGAAGG
gli3-test-R	GAGTCTAGGTAGCCGTTGCG
sf1-PAGE-F	CTCTACGGACCCCCGTCTTT
sf1-PAGE-R	CTCGGCTTTAATTGCCCTTCC
sf1-test-F	AGGGCCTTGAAACAGCAGAA
sf1-test-R	ATGCGACACATGAGGCTGAA
ptch1-ISH-F	AAAAAGCGGACATTGGGCAC	In situ hybridization
ptch1-ISH-R	GCCAAAAAGGGAAGCACCTG
ptch2-ISH-F	GTCATCCTGATCGCTTCCGT
ptch2-ISH-R	AGTGGCTTCACCACCGTAAG
gli1-ISH-F	GGCCCCTGCTTGGATCAATA
gli1-ISH-R	CAATCGCACCTCCAAGACCT
gli2-ISH-F	GGCGGTACCATTATGAGCCA
gli2-ISH-R	AAAGGTGCCCATAGGAGCTG
gli3-ISH-F	GCAACGGCTACCTAGACTCG
gli3-ISH-R	GTCGATCGCCTGCAGATACT
8xGLI-PGL4.23-F1	CTAGGACCACCCAGACCACCCAGACCACCCAGACCACCCAGACCACCCAGACCACCCAGACCACCCAGACCACCCA	Luciferase
8xGLI-PGL4.23-R1	AGCTTGGGTGGTCTGGGTGGTCTGGGTGGTCTGGGTGGTCTGGGTGGTCTGGGTGGTCTGGGTGGTCTGGGTGGTC
NT-Flag-Dhh-pcDNA3.1-F1	CTAGCTAGCATGAAGCAGTTCTGGTGGGC
NT-Flag-Dhh-pcDNA3.1-R1	CCGCTCGAGTTATTTATCATCATCATCTTTATAATCAGGATGAAATGACTCGG
NT-Flag-Gli1-pcDNA3.1-F1	TTTAAACTTAAGCTTGGTACATGGATTATAAAGATGATGATGATAAAGATTATAAAGATGATGATGATAAACCAGTGGACATGCAGCCACA
NT-Flag-Gli1-pcDNA3.1-R1	TGCGCATGTGAACCACCAGC
NT-Flag-Gli1-pcDNA3.1-F2	GCTGGTGGTTCACATGCGCA
NT-Flag-Gli1-pcDNA3.1-R2	AACCCTCCTCCAGGACACGG
NT-Flag-Gli1-pcDNA3.1-F3	CCGTGTCCTGGAGGAGGGTT
NT-Flag-Gli1-pcDNA3.1-R3	GTTTGCTGCAGAAGCATGCG
NT-Flag-Gli1-pcDNA3.1-F4	CGCATGCTTCTGCAGCAAAC
NT-Flag-Gli1-pcDNA3.1-R4	TCCACCACACTGGACTAGTGCTAAGACAGTGTATTCAGGT
NT-sf1-pGL3-F1	CGAGATCTGCGATCTAAGTATTACAAGTTAGACTTTTGTA
NT-sf1-pGL3-R1	GATTGCACCTTCAGTGCTCCTGGC
NT-sf1-pGL3-F2	GCCAGGAGCACTGAAGGTGCAATC
NT-sf1-pGL3-R2	CCAACAGTACCGGAATGCCATTGAGCAGCAGACAGCAGGC
sf1-qPCR-F	TGTCCCTTCTGTCGGTTCCA	Real-time PCR
sf1-qPCR-R	TCTCTTGTACATGGGGCCAA
tinagl1-qPCR-F	CTGGGCACACAAAGACCATC
tinagl1-qPCR-R	ATCGAGCGGTTCGTGAATCT
hgf-qPCR-F	GTGCTTTACCACCGACCCTC
hgf-qPCR-R	ACTTTCTGTGTGGTCCATTGGT
msx2-qPCR-F	CAGCGAAGACAGTCCACAGTT
msx2-qPCR-R	TAGTAAAGGGCGTGCGAGGT
amine oxidase-qPCR-F	TGTTATAGTGGTCGGTGCGG
amine oxidase-qPCR-R	GCACAGTGAAGGTACGACCA
thbs1-qPCR-F	CACAATGGCATCGTTCGCAA
thbs1-qPCR-R	CTCCATCGGGAACAGTAGCA
pappa2-qPCR-F	CACGTTCAGCCTGGAGCTTT
pappa2-qPCR-R	TGCCTACTGACCAACCCTTCT
sfrp5-qPCR-F	TCCGGTGATGGAGACCTACG
sfrp5-qPCR-R	CACCTTTGACACTGGTGGCT
F, forward primer; R, reverse primer
